# Supplementary material for: Photochemical selective difluoroalkylation reactions of bicyclobutanes: direct sustainable pathways to functionalized bioisosteres for drug discovery
Source: Royal Society of Chemistry journal article supplement (doi:10.1039/d4gc00703d), 2024-01-01

## **Supporting Information**

### **Photochemical Selective Difluoroalkylation reactions of Bicyclobutanes: Direct Sustainable Pathways to Functionalized Bioisosteres for Drug Discovery**

**Yunxin Duan <sup>a</sup>, Yerong Xu <sup>a</sup>, Yunzhe Li <sup>a</sup>, Lin Mao <sup>a</sup>, Jianquan Feng <sup>a</sup>, Ruyue Zhang <sup>a</sup>,**

**Weifang Tang <sup>a</sup>, Tao Lu <sup>\*a</sup>, Yadong Chen <sup>\*a,b</sup>, Jie Feng <sup>\*a,b</sup>**

<sup>a</sup> School of Sciences, China Pharmaceutical University, 639 Longmian Avenue, Nanjing,  
211198, PR China

<sup>b</sup> Hebei API Crystallization Technology Innovation Center, Shijiazhuang, PR China.

# Contents

|                                                                           |           |
|---------------------------------------------------------------------------|-----------|
| <b>1. General information</b>                                             | <b>3</b>  |
| <b>2. General procedures for the synthesis of substrates and products</b> | <b>3</b>  |
| 2.1. Preparation of bicyclo[1.1.0]butane compounds                        | 3         |
| 2.2. Preparation of 2-bromo-2,2-difluoroacetates                          | 8         |
| 2.3. Preparation of 2-bromo-2,2-difluoroacetamides                        | 11        |
| 2.4. Preparation of 2-bromo-2,2-difluoroketones                           | 15        |
| 2.5. Preparation of bromodifluoromethyl substituted heterocycles          | 16        |
| 2.6. General procedure A for the synthesis of <b>3a</b>                   | 18        |
| 2.7. General procedure B for the synthesis of <b>4a</b>                   | 18        |
| 2.8. Gram-scale synthesis                                                 | 19        |
| 2.9. Late-stage functionalization                                         | 20        |
| 2.10. Applications in ATR inhibitors                                      | 21        |
| <b>3. Reaction optimization</b>                                           | <b>23</b> |
| 3.1. Optimization of reaction conditions for the preparation of <b>3a</b> | 23        |
| 3.2. Optimization of reaction conditions for the preparation of <b>4a</b> | 26        |
| <b>4. Mechanistic studies</b>                                             | <b>26</b> |
| 4.1. Radical trapping experiments                                         | 26        |
| 4.2. Light on/off experiments                                             | 28        |
| 4.3. Deuterium labelling experiments                                      | 30        |
| 4.4. DFT calculations                                                     | 32        |
| <b>5. Product characterization</b>                                        | <b>49</b> |
| <b>6. Reference</b>                                                       | <b>79</b> |
| <b>7. NMR spectra (<sup>1</sup>H, <sup>13</sup>C and <sup>19</sup>F)</b>  | <b>82</b> |

## 1. General information

Unless otherwise noted, all reactants or reagents including dry solvents were obtained from commercial suppliers and used as received. All the reactions were conducted using reaction tube (10 mL). The reactions were performed under nitrogen atmosphere. Blue LEDs (25W, equipped with a thermostank) was used as light source. Analytical thin layer chromatography (TLC) was performed using Silica Gel 60 F25 plates. Column chromatograph was performed on silica gel 200~300 mesh.  $^1\text{H}$ ,  $^{19}\text{F}$  and  $^{13}\text{C}$  NMR spectra were obtained in  $\text{CDCl}_3$ , acetone- $d_6$ , or DMSO- $d_6$  using 300 MHz, 400 MHz Varian NMR spectrometer. Chemical shifts in  $^1\text{H}$  NMR and  $^{19}\text{F}$  NMR spectra are reported in parts per million (ppm) on the  $\delta$  scale from an internal standard of residual  $\text{CDCl}_3$  (7.26 ppm). Data are reported as follows: chemical shift, multiplicity (s = singlet, d = doublet, t = triplet, q = quartet, m = multiplet), integration, and coupling constant in Hertz (Hz). Chemical shifts in  $^{13}\text{C}$  NMR spectra are reported in ppm on the  $\delta$  scale from the central peak of residual  $\text{CDCl}_3$  (77.16 ppm). High resolution mass spectrometry (HRMS) was recorded on TOF premier for  $\text{ESI}^+$ .

## 2. General procedures for the synthesis of substrates and products

### 2.1 Preparation of bicyclo[1.1.0]butane compounds

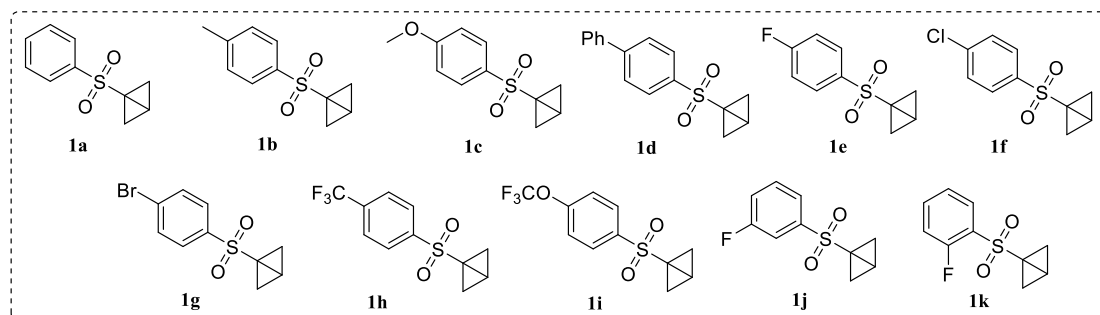

**Scheme S1.** Synthesis of bicyclo[1.1.0]butane compounds **1a-1k**<sup>a</sup>

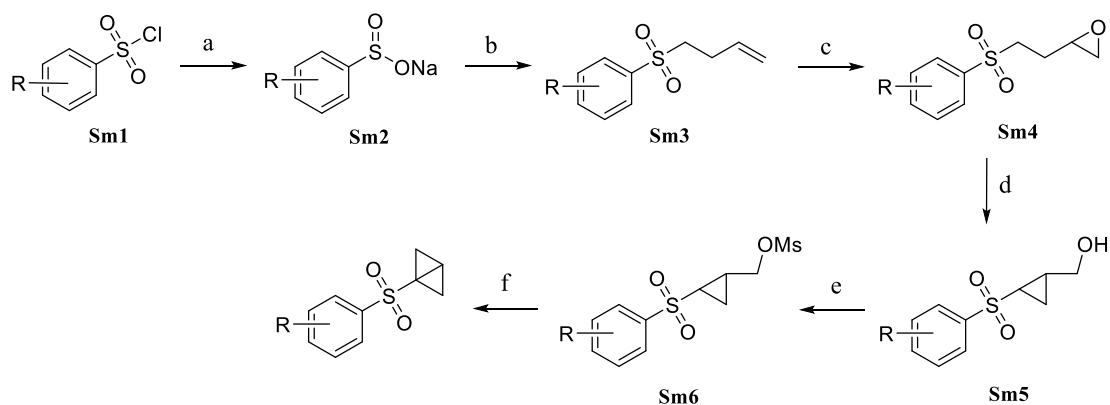

<sup>a</sup> Reagents and conditions: (a)  $\text{Na}_2\text{SO}_3$ ,  $\text{NaHCO}_3$ ,  $\text{H}_2\text{O}$ , 80 °C, 12 h; (b) 4-bromo-1-butene, DMF,

60 °C, 12 h; (c) Oxone, NaHCO<sub>3</sub>, acetone/H<sub>2</sub>O, rt, 12 h; (d) *n*-BuLi, anhydrous THF, 0 °C; (e) MsCl, TEA, DCM, 0 °C to rt, 12 h; (f) *n*-BuLi, anhydrous THF, 0 °C.

The preparations of bicyclo[1.1.0]butane compounds **1a-1k** were outlined in **Scheme S1** according to the procedure disclosed by Baran et al.<sup>1</sup>

Step a: To a solution of **Sm1** (19.2 mmol, 1.0 equiv.), and Na<sub>2</sub>SO<sub>3</sub> (38.4 mmol, 2.0 equiv.) in H<sub>2</sub>O (60 mL) was slowly added NaHCO<sub>3</sub> (38.4 mmol, 2.0 equiv.). The reaction mixture was stirred at 80 °C for 12 h then cooled to room temperature and concentrated under reduced pressure. The crude product was obtained by drying for couple hours and could be used directly in the next step without further purification.

Step b: To a solution of **Sm2** (14.4 mmol, 1.0 equiv.) in DMF (60 mL) was slowly added 4-bromo-1-butene (28.8 mmol, 2.0 equiv.). The reaction was stirred at 60 °C for 12 h then cooled to room temperature. The mixture was extracted by EtOAc (100 mL x 3) and washed with H<sub>2</sub>O followed by saturated NaCl solution. The organic layers were dried over anhydrous Na<sub>2</sub>SO<sub>4</sub>, filtered, and evaporated to give residue, which was purified by silica gel column chromatography with petroleum ether/EtOAc (30:1 to 20:1, v/v) as eluents furnishing the desired product.

Step c: To a solution of **Sm3** (11.5 mmol, 1.0 equiv.), and Oxone (17.3 mmol, 1.5 equiv.) in acetone (50 mL) and H<sub>2</sub>O (50 mL) was slowly added NaHCO<sub>3</sub> (57.5 mmol, 5.0 equiv.). The reaction mixture was stirred at room temperature for 12 h. The reaction mixture was evaporated to remove acetone then extracted by EtOAc (50 mL x 3) and washed with H<sub>2</sub>O followed by saturated NaCl solution. The organic layers were dried over anhydrous Na<sub>2</sub>SO<sub>4</sub>, filtered, and evaporated to give residue, which was purified by silica gel column chromatography with petroleum ether/EtOAc (6:1 to 4:1, v/v) as eluents furnishing the desired product.

Step d: To a solution of **Sm4** (5 mmol, 1.0 equiv.) in anhydrous THF (30 mL) was dropwise added *n*-BuLi (2.5 M in hexane, 2.2 mL, 1.1 equiv.) in an ice/water bath. The reaction mixture was stirred at 0 °C for 15 min under a nitrogen atmosphere then quenched with saturated NH<sub>4</sub>Cl solution. The mixture was extracted by EtOAc (50 mL x 3) and washed with H<sub>2</sub>O followed by saturated NaCl solution. The organic layers were dried over anhydrous Na<sub>2</sub>SO<sub>4</sub>, filtered, and evaporated to give residue, which was purified by silica gel column chromatography with petroleum ether/EtOAc (5:1 to 3:1, v/v) as eluents furnishing the desired product.

Step e: To a solution of **Sm5** (5 mmol, 1.0 equiv.), and TEA (10 mmol, 2.0 equiv.) in DCM (30 mL) was dropwise added MsCl (7.5 mmol, 1.5 equiv.) in an ice/water bath. The reaction was stirred at room temperature for 12 h. The mixture was extracted by DCM (50 mL x 3) and washed with H<sub>2</sub>O followed by saturated NaCl solution. The organic layers were dried over anhydrous Na<sub>2</sub>SO<sub>4</sub>, filtered, and evaporated to give residue, which was purified by silica gel column chromatography with petroleum ether/EtOAc (3:1 to 1:1, v/v) as eluents furnishing the desired product.

Step f: To a solution of **Sm6** (1 mmol, 1.0 equiv.) in anhydrous THF (20 mL) was dropwise added *n*-BuLi (2.5 M in hexane, 0.44 mL, 1.1 equiv.) in an ice/water bath. The reaction mixture was stirred at 0 °C for 15 min under a nitrogen atmosphere then quenched with saturated NH<sub>4</sub>Cl solution. The mixture was extracted by EtOAc (50 mL x 3) and washed with H<sub>2</sub>O followed by saturated NaCl solution. The organic layers were dried over anhydrous Na<sub>2</sub>SO<sub>4</sub>, filtered, and evaporated to give residue, which was purified by silica gel column chromatography with petroleum ether/EtOAc (20:1 to 10:1, v/v) as eluents furnishing the desired product.

#### 1-(phenylsulfonyl)bicyclo[1.1.0]butane (**1a**)

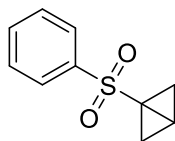

White solid. Yield: 44 %. <sup>1</sup>H NMR (300 MHz, DMSO-*d*<sub>6</sub>) δ 7.95 – 7.87 (m, 2H), 7.78 – 7.71 (m, 1H), 7.71 – 7.63 (m, 2H), 2.87 – 2.78 (m, 1H), 2.40 – 2.30 (m, 2H), 1.46 – 1.37 (m, 2H). The spectroscopic data of **1a** was consistent with previously reported data.<sup>2</sup>

#### 1-tosylbicyclo[1.1.0]butane (**1b**)

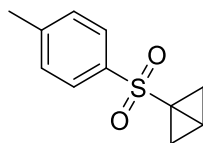

White solid. Yield: 54 %. <sup>1</sup>H NMR (300 MHz, CDCl<sub>3</sub>) δ 7.81 (d, *J* = 8.4 Hz, 2H), 7.35 (d, *J* = 7.9 Hz, 2H), 2.54 – 2.47 (m, 3H), 2.44 (s, 3H), 1.37 – 1.34 (m, 2H). The spectroscopic data of **1b** was consistent with previously reported data.<sup>2</sup>

#### 1-((4-methoxyphenyl)sulfonyl)bicyclo[1.1.0]butane (**1c**)

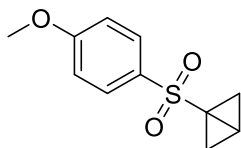

White solid. Yield: 58 %.  $^1\text{H NMR}$  (300 MHz,  $\text{CDCl}_3$ )  $\delta$  7.86 (d,  $J = 8.9$  Hz, 2H), 7.01 (d,  $J = 9.0$  Hz, 2H), 3.88 (s, 3H), 2.48 (s, 3H), 1.35 (s, 2H). The spectroscopic data of **1c** was consistent with previously reported data.<sup>2</sup>

#### 1-([1,1'-biphenyl]-4-ylsulfonyl)bicyclo[1.1.0]butane (**1d**)

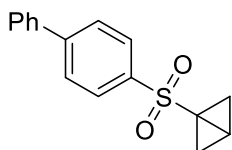

White solid. Yield: 60 %.  $^1\text{H NMR}$  (300 MHz,  $\text{CDCl}_3$ )  $\delta$  8.01 (d,  $J = 8.6$  Hz, 2H), 7.76 (d,  $J = 8.7$  Hz, 2H), 7.65 – 7.59 (m, 2H), 7.53 – 7.39 (m, 3H), 2.63 – 2.58 (m, 1H), 2.56 (d,  $J = 3.3$  Hz, 2H), 1.42 (d,  $J = 2.7$  Hz, 2H).  $^{13}\text{C NMR}$  (101 MHz,  $\text{DMSO}-d_6$ )  $\delta$  144.9, 140.1, 138.4, 129.2, 128.7, 127.8, 127.5, 127.2, 37.7, 22.9, 12.3. **HRMS** (ESI) for  $\text{C}_{16}\text{H}_{15}\text{O}_2\text{S}$  [ $\text{M} + \text{H}$ ]<sup>+</sup>, calcd: 271.0787, found: 271.0791.

#### 1-((4-fluorophenyl)sulfonyl)bicyclo[1.1.0]butane (**1e**)

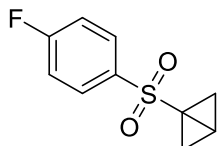

White solid. Yield: 56 %.  $^1\text{H NMR}$  (300 MHz,  $\text{CDCl}_3$ )  $\delta$  8.05 – 7.97 (m, 2H), 7.30 (d,  $J = 8.7$  Hz, 2H), 2.68 – 2.62 (m, 1H), 2.57 (d,  $J = 3.6$  Hz, 2H), 1.45 (d,  $J = 2.8$  Hz, 2H).  $^{19}\text{F NMR}$  (282 MHz,  $\text{CDCl}_3$ )  $\delta$  -104.71. The spectroscopic data of **1e** was consistent with previously reported data.<sup>2</sup>

#### 1-((4-chlorophenyl)sulfonyl)bicyclo[1.1.0]butane (**1f**)

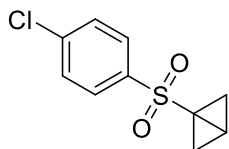

White solid. Yield: 52 %.  $^1\text{H NMR}$  (300 MHz,  $\text{CDCl}_3$ )  $\delta$  7.88 (d,  $J = 8.6$  Hz, 2H), 7.53 (d,  $J = 8.6$  Hz, 2H), 2.65 – 2.58 (m, 1H), 2.52 (d,  $J = 3.9$  Hz, 2H), 1.40 (s, 2H). The spectroscopic data of **1f** was consistent with previously reported data.<sup>2</sup>

#### 1-((4-bromophenyl)sulfonyl)bicyclo[1.1.0]butane (**1g**)

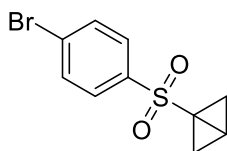

White solid. Yield: 40 %.  $^1\text{H NMR}$  (300 MHz,  $\text{CDCl}_3$ )  $\delta$  7.81 (d,  $J = 8.7$  Hz, 2H), 7.70 (d,  $J = 8.7$  Hz, 2H), 2.66 – 2.58 (m, 1H), 2.52 (d,  $J = 3.6$  Hz, 2H), 1.40 (s, 2H). The spectroscopic data of **1g** was consistent with previously reported data.<sup>3</sup>

#### 1-((4-(trifluoromethyl)phenyl)sulfonyl)bicyclo[1.1.0]butane (**1h**)

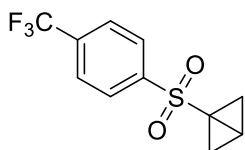

White solid. Yield: 60 %.  $^1\text{H NMR}$  (300 MHz,  $\text{CDCl}_3$ )  $\delta$  8.08 (d,  $J = 8.1$  Hz, 2H), 7.83 (d,  $J = 8.2$  Hz, 2H), 2.72 – 2.65 (m, 1H), 2.55 (d,  $J = 3.8$  Hz, 2H), 1.43 (d,  $J = 2.8$  Hz, 2H).  $^{19}\text{F NMR}$  (282 MHz,  $\text{CDCl}_3$ )  $\delta$  -63.11. The spectroscopic data of **1h** was consistent with previously reported data.<sup>2</sup>

#### 1-((4-(trifluoromethoxy)phenyl)sulfonyl)bicyclo[1.1.0]butane (**1i**)

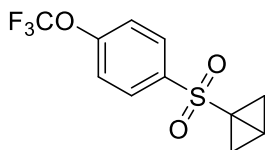

White solid. Yield: 54 %.  $^1\text{H NMR}$  (300 MHz,  $\text{CDCl}_3$ )  $\delta$  8.03 – 7.96 (m, 2H), 7.38 (d,  $J = 7.9$  Hz, 2H), 2.68 – 2.61 (m, 1H), 2.54 (d,  $J = 3.7$  Hz, 2H), 1.42 (d,  $J = 2.8$  Hz, 2H).  $^{19}\text{F NMR}$  (282 MHz,  $\text{CDCl}_3$ )  $\delta$  -57.68. The spectroscopic data of **1i** was consistent with previously reported data.<sup>2</sup>

#### 1-((3-fluorophenyl)sulfonyl)bicyclo[1.1.0]butane (**1j**)

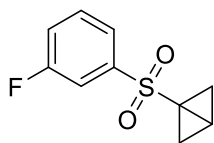

White solid. Yield: 42 %.  $^1\text{H NMR}$  (300 MHz,  $\text{CDCl}_3$ )  $\delta$  7.77 – 7.71 (m, 1H), 7.67 – 7.61 (m, 1H), 7.59 – 7.51 (m, 1H), 7.36 – 7.28 (m, 1H), 2.66 – 2.60 (m, 1H), 2.53 (d,  $J = 3.8$  Hz, 2H), 1.42 (d,  $J = 2.8$  Hz, 2H).  $^{19}\text{F NMR}$  (282 MHz,  $\text{CDCl}_3$ )  $\delta$  -109.52. The spectroscopic data of **1j** was consistent with previously reported data.<sup>2</sup>

#### 1-((2-fluorophenyl)sulfonyl)bicyclo[1.1.0]butane (**1k**)

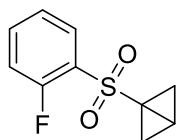

White solid. Yield: 35 %.  $^1\text{H NMR}$  (300 MHz,  $\text{CDCl}_3$ )  $\delta$  8.00 – 7.91 (m, 1H), 7.67 – 7.57 (m, 1H), 7.36 – 7.20 (m, 2H), 2.71 – 2.64 (m, 1H), 2.60 (d,  $J = 4.7$  Hz, 2H), 1.46 (d,  $J = 5.0$  Hz, 2H).  $^{19}\text{F NMR}$  (282 MHz,  $\text{CDCl}_3$ )  $\delta$  -108.49. The spectroscopic data of **1k** was consistent with previously reported data.<sup>3</sup>

## 2.2 Preparation of 2-bromo-2,2-difluoroacetates

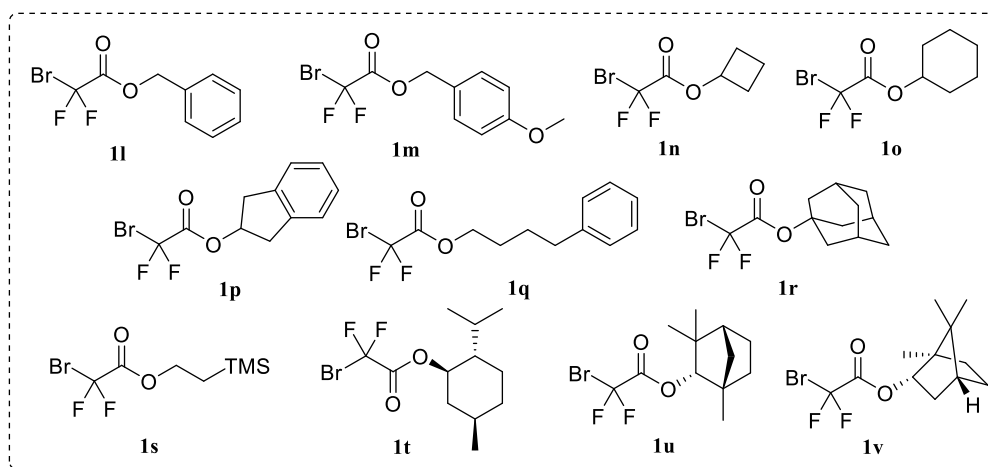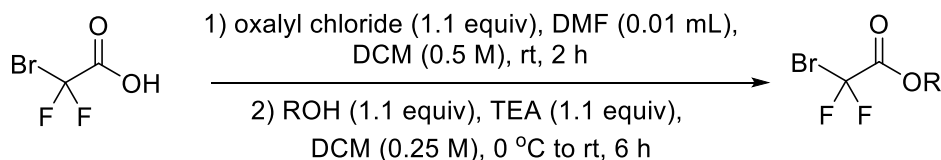

To a 2-bromo-2,2-difluoroacetic acid (5.00 mmol, 1.00 equiv.) in DCM (10.0 mL, 0.50 M) was slowly added oxalyl chloride (5.50 mmol, 1.10 equiv.) and DMF (0.01 mL) at room temperature. The reaction mixture was stirred at room temperature for 2 h then cooled to 0 °C, and then a mixture of ROH (5.50 mmol, 1.1 equiv.) and TEA (5.50 mmol, 1.10 equiv.) dissolved in DCM was added dropwise. The reaction mixture stirred at room temperature for 6 h then quenched with saturated  $\text{NaHCO}_3$  solution, extracted with DCM (25 mL x 3), and washed with  $\text{H}_2\text{O}$  followed by saturated  $\text{NaCl}$  solution. The organic layers were dried over anhydrous  $\text{Na}_2\text{SO}_4$ , filtered, and evaporated to give residue, which was purified by silica gel column chromatography with petroleum ether/EtOAc (100:1, v/v) as eluents furnishing the desired product.



### benzyl 2-bromo-2,2-difluoroacetate (**1l**)

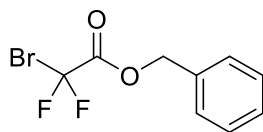

Colorless oil. Yield: 72 %.  $^1\text{H NMR}$  (300 MHz,  $\text{CDCl}_3$ )  $\delta$  7.41 (s, 5H), 5.37 (s, 2H).  $^{19}\text{F NMR}$  (282 MHz,  $\text{CDCl}_3$ )  $\delta$  -60.74. The spectroscopic data of **1l** was consistent with previously reported data.<sup>4</sup>

### 4-methoxybenzyl 2-bromo-2,2-difluoroacetate (**1m**)

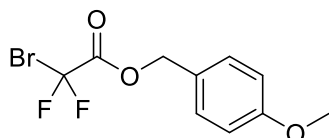

Colorless oil. Yield: 65 %.  $^1\text{H NMR}$  (300 MHz,  $\text{CDCl}_3$ )  $\delta$  7.35 (d,  $J = 8.8$  Hz, 2H), 6.92 (d,  $J = 8.8$  Hz, 2H), 5.30 (s, 2H), 3.82 (s, 3H).  $^{13}\text{C NMR}$  (75 MHz,  $\text{CDCl}_3$ )  $\delta$  160.5, 159.6 (t,  $^2J_{\text{C-F}} = 31.5$  Hz), 130.8, 125.6, 114.3, 108.9 (t,  $^1J_{\text{C-F}} = 312.8$  Hz), 69.9, 55.4.  $^{19}\text{F NMR}$  (282 MHz,  $\text{CDCl}_3$ )  $\delta$  -60.75.

**HRMS** (ESI) for  $\text{C}_{10}\text{H}_{10}\text{BrF}_2\text{O}_3$  [ $\text{M} + \text{H}$ ]<sup>+</sup>, calcd: 294.9775, found: 294.9780.

### cyclobutyl 2-bromo-2,2-difluoroacetate (**1n**)

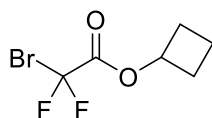

Colorless oil. Yield: 80 %.  $^1\text{H NMR}$  (300 MHz,  $\text{CDCl}_3$ )  $\delta$  5.23 – 5.10 (m, 1H), 2.52 – 2.38 (m, 2H), 2.33 – 2.14 (m, 2H), 1.98 – 1.83 (m, 1H), 1.78 – 1.60 (m, 1H).  $^{19}\text{F NMR}$  (282 MHz,  $\text{CDCl}_3$ )  $\delta$  -60.99. The spectroscopic data of **1n** was consistent with previously reported data.<sup>4</sup>

### cyclohexyl 2-bromo-2,2-difluoroacetate (**1o**)

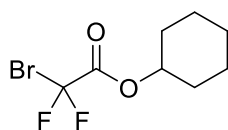

Colorless oil. Yield: 80 %.  $^1\text{H NMR}$  (300 MHz,  $\text{CDCl}_3$ )  $\delta$  5.03 – 4.91 (m, 1H), 1.97 – 1.85 (m, 2H), 1.84 – 1.70 (m, 2H), 1.66 – 1.50 (m, 3H), 1.49 – 1.28 (m, 3H).  $^{19}\text{F NMR}$  (282 MHz,  $\text{CDCl}_3$ )  $\delta$  -60.92. The spectroscopic data of **1o** was consistent with previously reported data.<sup>4</sup>

### 2,3-dihydro-1*H*-inden-2-yl 2-bromo-2,2-difluoroacetate (**1p**)

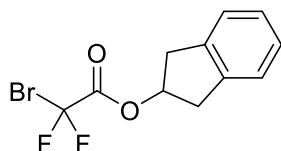

White solid. Yield: 72 %.  $^1\text{H NMR}$  (300 MHz,  $\text{CDCl}_3$ )  $\delta$  7.32 – 7.22 (m, 4H), 5.74 (tt,  $J = 6.4, 3.0$  Hz, 1H), 3.45 (dd,  $J = 17.3, 6.5$  Hz, 2H), 3.17 (dd,  $J = 17.3, 3.0$  Hz, 2H).  $^{19}\text{F NMR}$  (282 MHz,  $\text{CDCl}_3$ )  $\delta$  -61.03. The spectroscopic data of **1p** was consistent with previously reported data.<sup>5</sup>

#### 4-phenylbutyl 2-bromo-2,2-difluoroacetate (**1q**)

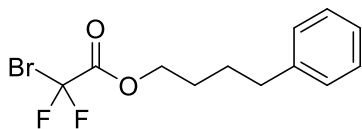

Colorless oil. Yield: 73 %.  $^1\text{H NMR}$  (300 MHz,  $\text{CDCl}_3$ )  $\delta$  7.35 – 7.28 (m, 2H), 7.25 – 7.17 (m, 3H), 4.38 (t,  $J = 6.2$  Hz, 2H), 2.69 (t,  $J = 7.2$  Hz, 2H), 1.87 – 1.70 (m, 4H).  $^{19}\text{F NMR}$  (282 MHz,  $\text{CDCl}_3$ )  $\delta$  -60.70. The spectroscopic data of **1q** was consistent with previously reported data.<sup>6</sup>

#### (3*s*,5*s*,7*s*)-adamantan-1-yl 2-bromo-2,2-difluoroacetate (**1r**)

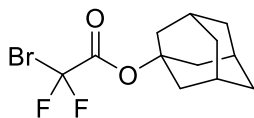

Colorless oil. Yield: 67 %.  $^1\text{H NMR}$  (300 MHz,  $\text{CDCl}_3$ )  $\delta$  2.24 (s, 3H), 2.20 – 2.15 (m, 6H), 1.72 – 1.66 (m, 6H).  $^{19}\text{F NMR}$  (282 MHz,  $\text{CDCl}_3$ )  $\delta$  -60.86. The spectroscopic data of **1r** was consistent with previously reported data.<sup>4</sup>

#### 2-(trimethylsilyl)ethyl 2-bromo-2,2-difluoroacetate (**1s**)

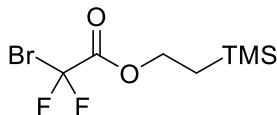

Colorless oil. Yield: 58 %.  $^1\text{H NMR}$  (300 MHz,  $\text{CDCl}_3$ )  $\delta$  4.49 – 4.39 (m, 2H), 1.18 – 1.08 (m, 2H), 0.08 (s, 9H).  $^{19}\text{F NMR}$  (282 MHz,  $\text{CDCl}_3$ )  $\delta$  -60.74. The spectroscopic data of **1s** was consistent with previously reported data.<sup>4</sup>

#### (1*R*,2*S*,5*R*)-2-isopropyl-5-methylcyclohexyl 2-bromo-2,2-difluoroacetate (**1t**)

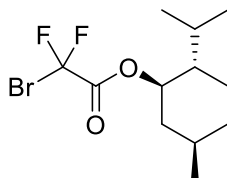

Colorless oil. Yield: 73 %.  $^1\text{H NMR}$  (300 MHz,  $\text{CDCl}_3$ )  $\delta$  4.90 – 4.78 (m, 1H), 2.11 – 2.01 (m, 1H), 1.98 – 1.86 (m, 1H), 1.79 – 1.66 (m, 2H), 1.61 – 1.44 (m, 2H), 1.20 – 1.00 (m, 2H), 0.98 – 0.87 (m, 7H), 0.78 (d,  $J = 7.0$  Hz, 3H).  $^{19}\text{F NMR}$  (282 MHz,  $\text{CDCl}_3$ )  $\delta$  -60.88 (d,  $J = 5.6$  Hz). The

spectroscopic data of **1t** was consistent with previously reported data.<sup>4</sup>

**(1S,2S,4R)-1,3,3-trimethylbicyclo[2.2.1]heptan-2-yl 2-bromo-2,2-difluoroacetate (**1u**)**

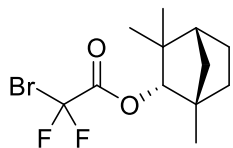

Colorless oil. Yield: 70 %. <sup>1</sup>H NMR (300 MHz, CDCl<sub>3</sub>) δ 4.50 (d, *J* = 2.0 Hz, 1H), 1.83 – 1.68 (m, 3H), 1.62 (d, *J* = 8.3 Hz, 1H), 1.57 – 1.43 (m, 1H), 1.30 – 1.12 (m, 5H), 1.10 (s, 3H), 0.86 (s, 3H).

<sup>19</sup>F NMR (282 MHz, CDCl<sub>3</sub>) δ -60.19 (d, *J* = 9.2 Hz). The spectroscopic data of **1u** was consistent with previously reported data.<sup>5</sup>

**(1R,2R,4R)-1,7,7-trimethylbicyclo[2.2.1]heptan-2-yl 2-bromo-2,2-difluoroacetate (**1v**)**

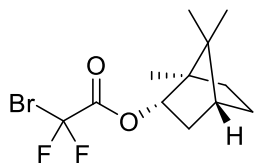

Colorless oil. Yield: 65 %. <sup>1</sup>H NMR (300 MHz, CDCl<sub>3</sub>) δ 4.83 (t, *J* = 5.7 Hz, 1H), 1.91 – 1.67 (m, 4H), 1.66 – 1.55 (m, 1H), 1.22 – 1.06 (m, 2H), 0.99 (s, 3H), 0.92 (s, 3H), 0.86 (s, 3H). <sup>19</sup>F NMR

(282 MHz, CDCl<sub>3</sub>) δ -60.75 (d, *J* = 3.1 Hz). The spectroscopic data of **1v** was consistent with previously reported data.<sup>7</sup>

**2.3 Preparation of 2-bromo-2,2-difluoroacetamides**

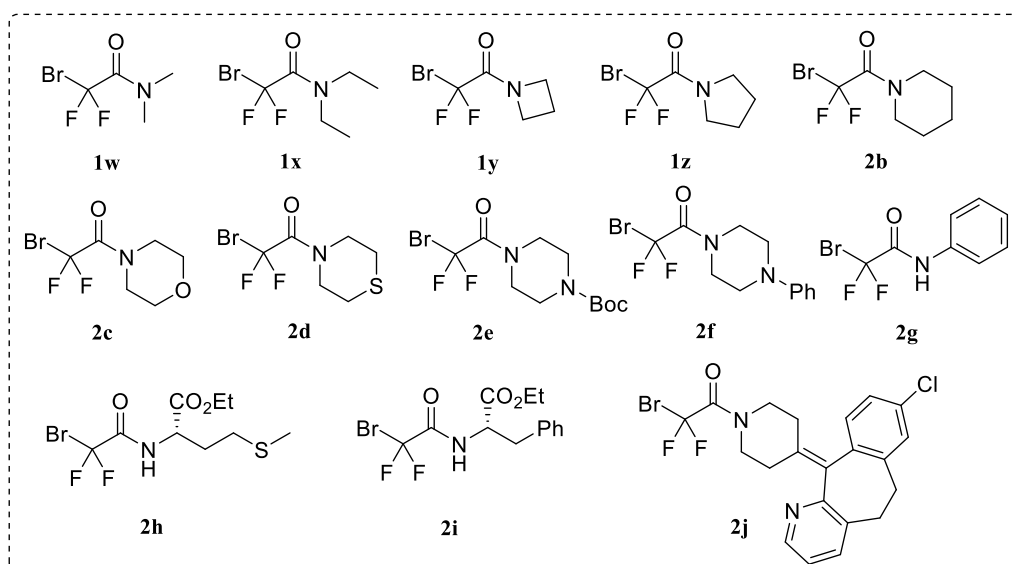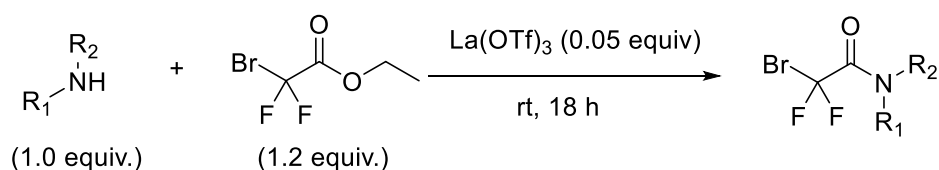

To a solution of ethyl 2-bromo-2,2-difluoroacetate (1.2 mmol, 1.2 equiv.), and amine (1.0 mmol, 1.0 equiv.) was slowly added La(OTf)<sub>3</sub> (0.05 mmol, 0.05 equiv.). The reaction was stirred at room temperature for 18 h, and was extracted by EtOAc (25 mL x 3) and washed with H<sub>2</sub>O followed by saturated NaCl solution. The organic layers were dried over anhydrous Na<sub>2</sub>SO<sub>4</sub>, filtered, and evaporated to give residue, which was purified by silica gel column chromatography with petroleum ether/EtOAc (50:1, v/v) as eluents furnishing the desired product.

**2-bromo-2,2-difluoro-*N,N*-dimethylacetamide (1w)**

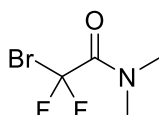

Colorless oil. Yield: 75 %. <sup>1</sup>H NMR (300 MHz, CDCl<sub>3</sub>) δ 3.17 (s, 3H), 3.04 (s, 3H). <sup>19</sup>F NMR (282 MHz, CDCl<sub>3</sub>) δ -54.38. The spectroscopic data of **1w** was consistent with previously reported data.<sup>8</sup>

**2-bromo-*N,N*-diethyl-2,2-difluoroacetamide (1x)**

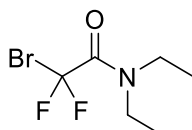

Colorless oil. Yield: 81 %. <sup>1</sup>H NMR (300 MHz, CDCl<sub>3</sub>) δ 3.52 (q, *J* = 7.1 Hz, 2H), 3.42 (q, *J* = 7.1 Hz, 2H), 1.28 – 1.14 (m, 6H). <sup>19</sup>F NMR (282 MHz, CDCl<sub>3</sub>) δ -54.12. The spectroscopic data of **1x** was consistent with previously reported data.<sup>8</sup>

**1-(azetidin-1-yl)-2-bromo-2,2-difluoroethan-1-one (1y)**

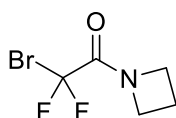

Colorless oil. Yield: 70 %. <sup>1</sup>H NMR (300 MHz, CDCl<sub>3</sub>) δ 4.44 – 4.32 (m, 2H), 4.20 – 4.08 (m, 2H), 2.47 – 2.31 (m, 2H). <sup>19</sup>F NMR (282 MHz, CDCl<sub>3</sub>) δ -57.88. The spectroscopic data of **1y** was consistent with previously reported data.<sup>8</sup>

**2-bromo-2,2-difluoro-1-(pyrrolidin-1-yl)ethan-1-one (1z)**

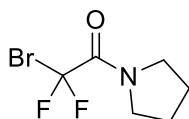

Colorless oil. Yield: 80 %. <sup>1</sup>H NMR (300 MHz, CDCl<sub>3</sub>) δ 3.58 (dd, *J* = 25.9, 7.0 Hz, 4H), 1.93 (dd, *J* = 33.6, 6.8 Hz, 4H). <sup>19</sup>F NMR (282 MHz, CDCl<sub>3</sub>) δ -56.85. The spectroscopic data of **1z** was

consistent with previously reported data.<sup>8</sup>

**2-bromo-2,2-difluoro-1-(piperidin-1-yl)ethan-1-one (2b)**

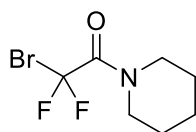

Colorless oil. Yield: 80 %. <sup>1</sup>H NMR (300 MHz, CDCl<sub>3</sub>) δ 3.64 – 3.53 (m, 4H), 1.72 – 1.55 (m, 6H).

<sup>19</sup>F NMR (282 MHz, CDCl<sub>3</sub>) δ -53.89. The spectroscopic data of **2b** was consistent with previously reported data.<sup>9</sup>

**2-bromo-2,2-difluoro-1-morpholinoethan-1-one (2c)**

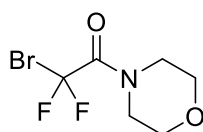

Colorless oil. Yield: 80 %. <sup>1</sup>H NMR (300 MHz, CDCl<sub>3</sub>) δ 3.78 – 3.65 (m, 8H). <sup>19</sup>F NMR (282 MHz,

CDCl<sub>3</sub>) δ -54.52. The spectroscopic data of **2c** was consistent with previously reported data.<sup>8</sup>

**2-bromo-2,2-difluoro-1-thiomorpholinoethan-1-one (2d)**

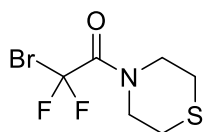

Colorless oil. Yield: 77 %. <sup>1</sup>H NMR (300 MHz, CDCl<sub>3</sub>) δ 3.97 – 3.87 (m, 4H), 2.75 – 2.64 (m, 4H).

<sup>19</sup>F NMR (282 MHz, CDCl<sub>3</sub>) δ -54.10. The spectroscopic data of **2d** was consistent with previously reported data.<sup>8</sup>

**tert-butyl 4-(2-bromo-2,2-difluoroacetyl)piperazine-1-carboxylate (2e)**

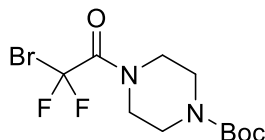

White solid. Yield: 74 %. <sup>1</sup>H NMR (300 MHz, CDCl<sub>3</sub>) δ 3.71 – 3.62 (m, 4H), 3.56 – 3.47 (m, 4H),

1.47 (s, 9H). <sup>19</sup>F NMR (282 MHz, CDCl<sub>3</sub>) δ -54.38. The spectroscopic data of **2e** was consistent with previously reported data.<sup>9</sup>

**2-bromo-2,2-difluoro-1-(4-phenylpiperazin-1-yl)ethan-1-one (2f)**

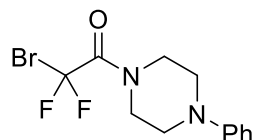

White solid. Yield: 74 %.  $^1\text{H NMR}$  (300 MHz,  $\text{CDCl}_3$ )  $\delta$  7.34 – 7.27 (m, 2H), 6.98 – 6.91 (m, 3H), 3.90 – 3.82 (m, 4H), 3.29 – 3.21 (m, 4H).  $^{19}\text{F NMR}$  (282 MHz,  $\text{CDCl}_3$ )  $\delta$  -54.20. The spectroscopic data of **2f** was consistent with previously reported data.<sup>10</sup>

#### 2-bromo-2,2-difluoro-*N*-phenylacetamide (**2g**)

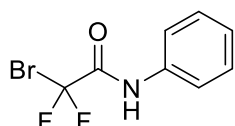

White solid. Yield: 60 %.  $^1\text{H NMR}$  (300 MHz,  $\text{CDCl}_3$ )  $\delta$  7.86 (s, 1H), 7.61 – 7.54 (m, 2H), 7.44 – 7.36 (m, 2H), 7.28 – 7.20 (m, 1H).  $^{19}\text{F NMR}$  (282 MHz,  $\text{CDCl}_3$ )  $\delta$  -60.61. The spectroscopic data of **2g** was consistent with previously reported data.<sup>8</sup>

#### ethyl (2-bromo-2,2-difluoroacetyl)-*L*-methioninate (**2h**)

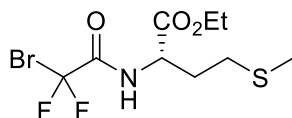

Colorless oil. Yield: 78 %.  $^1\text{H NMR}$  (300 MHz,  $\text{CDCl}_3$ )  $\delta$  7.36 – 7.27 (m, 1H), 4.70 – 4.58 (m, 1H), 4.19 (q,  $J = 7.2$  Hz, 2H), 2.53 – 2.44 (m, 2H), 2.27 – 2.13 (m, 1H), 2.12 – 1.98 (m, 4H), 1.25 (t,  $J = 7.1$  Hz, 3H).  $^{13}\text{C NMR}$  (75 MHz,  $\text{CDCl}_3$ )  $\delta$  170.5, 159.7 (t,  $^2J_{\text{C-F}} = 32.3$  Hz), 111.2 (t,  $^1J_{\text{C-F}} = 313.5$  Hz), 62.2, 52.1, 30.7, 29.7, 15.3, 14.0.  $^{19}\text{F NMR}$  (282 MHz,  $\text{CDCl}_3$ )  $\delta$  -61.01. **HRMS** (ESI) for  $\text{C}_9\text{H}_{15}\text{BrF}_2\text{NO}_3\text{S}$  [ $\text{M} + \text{H}$ ]<sup>+</sup>, calcd: 333.9916, found: 333.9924.

#### ethyl (2-bromo-2,2-difluoroacetyl)-*L*-phenylalaninate (**2i**)

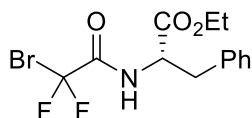

White solid. Yield: 75 %.  $^1\text{H NMR}$  (300 MHz,  $\text{CDCl}_3$ )  $\delta$  7.34 – 7.27 (m, 3H), 7.15 – 7.07 (m, 2H), 6.77 – 6.63 (m, 1H), 4.89 – 4.78 (m, 1H), 4.23 (q,  $J = 7.1$  Hz, 2H), 3.30 – 3.13 (m, 2H), 1.29 (t,  $J = 7.1$  Hz, 3H).  $^{19}\text{F NMR}$  (282 MHz,  $\text{CDCl}_3$ )  $\delta$  -60.82. The spectroscopic data of **2i** was consistent with previously reported data.<sup>7</sup>

#### 2-bromo-1-(4-(8-chloro-5,6-dihydro-11*H*-benzo[5,6]cyclohepta[1,2-*b*]pyridin-11-ylidene)piperidin-1-yl)-2,2-difluoroethan-1-one (**2j**)

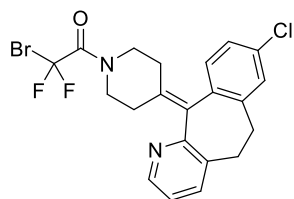

White solid. Yield: 70 %.  $^1\text{H NMR}$  (300 MHz,  $\text{CDCl}_3$ )  $\delta$  8.46 – 8.39 (m, 1H), 7.55 – 7.44 (m, 1H), 7.22 – 7.10 (m, 4H), 4.15 – 3.86 (m, 2H), 3.55 – 3.26 (m, 4H), 2.96 – 2.37 (m, 6H).  $^{13}\text{C NMR}$  (101 MHz,  $\text{CDCl}_3$ )  $\delta$  157.9 (t,  $^2J_{\text{C-F}} = 26.3$  Hz), 156.5, 146.7, 139.6, 137.9, 137.4, 135.5, 135.4, 133.4, 133.3, 130.3, 129.1, 126.3, 122.5, 110.7 (t,  $^1J_{\text{C-F}} = 316.6$  Hz), 47.2, 45.0, 31.6, 31.5, 30.7, 29.9.  $^{19}\text{F NMR}$  (282 MHz,  $\text{CDCl}_3$ )  $\delta$  -54.11. **HRMS** (ESI) for  $\text{C}_{21}\text{H}_{19}\text{BrClF}_2\text{N}_2\text{O}$  [ $\text{M} + \text{H}$ ] $^+$ , calcd: 467.0331, found: 467.0341.

#### 2.4 Preparation of 2-bromo-2,2-difluoroketones

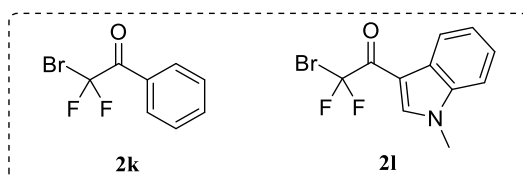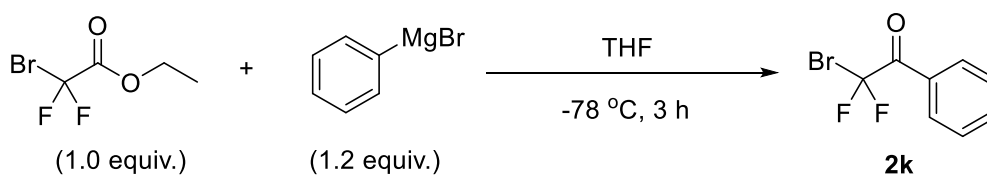

To a solution of ethyl 2-bromo-2,2-difluoroacetate (1.0 mmol, 1.0 equiv.) in anhydrous THF (10 mL) was dropwise added phenyl magnesium bromide (1.0 mol/l in THF, 1.2 mL, 1.2 equiv.) at  $-78$  °C under nitrogen atmosphere. The reaction was stirred at  $-78$  °C for 3 h and quenched with saturated  $\text{NH}_4\text{Cl}$  solution, extracted with EtOAc (25 mL x 3), and washed with  $\text{H}_2\text{O}$  followed by saturated NaCl solution. The organic layers were dried over anhydrous  $\text{Na}_2\text{SO}_4$ , filtered, and evaporated to give residue, which was purified by silica gel column chromatography with petroleum ether/EtOAc (100:1, v/v) as eluents furnishing the desired product.

#### 2-bromo-2,2-difluoro-1-phenylethan-1-one (**2k**)

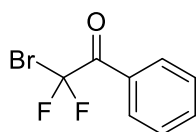

Colorless oil. Yield: 60 %.  $^1\text{H NMR}$  (300 MHz,  $\text{CDCl}_3$ )  $\delta$  8.15 (d,  $J = 7.4$  Hz, 2H), 7.68 (d,  $J = 7.5$  Hz, 1H), 7.58 – 7.49 (m, 2H).  $^{19}\text{F NMR}$  (282 MHz,  $\text{CDCl}_3$ )  $\delta$  -57.80. The spectroscopic data of **2k**

was consistent with previously reported data.<sup>11</sup>

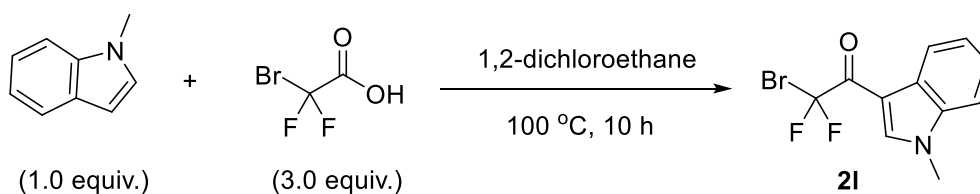

To a solution of 1-methyl-1*H*-indole (1.0 mmol, 1.0 equiv.) in 1,2-dichloroethane (30 mL) was added 2-bromo-2,2-difluoroacetic acid (3.0 mmol, 3.0 equiv.). The reaction was stirred at 100 °C for 10 h and cooled to room temperature. The reaction mixture was quenched with saturated NaHCO<sub>3</sub> solution, extracted with DCM (25 mL x 3), and washed with H<sub>2</sub>O followed by saturated NaCl solution. The organic layers were dried over anhydrous Na<sub>2</sub>SO<sub>4</sub>, filtered, and evaporated to give residue, which was purified by silica gel column chromatography with petroleum ether/EtOAc (50:1, v/v) as eluents furnishing the desired product.

#### 2-bromo-2,2-difluoro-1-(1-methyl-1*H*-indol-3-yl)ethan-1-one (**2l**)

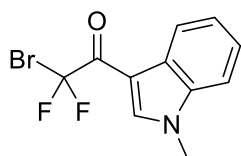

Brown solid. Yield: 66 %. <sup>1</sup>H NMR (300 MHz, CDCl<sub>3</sub>) δ 8.46 – 8.37 (m, 1H), 7.97 (s, 1H), 7.40 (d, *J* = 3.1 Hz, 3H), 3.92 (s, 3H). <sup>19</sup>F NMR (282 MHz, CDCl<sub>3</sub>) δ -56.79. The spectroscopic data of **2l** was consistent with previously reported data.<sup>12</sup>

#### 2.5 Preparation of bromodifluoromethyl substituted heterocycles

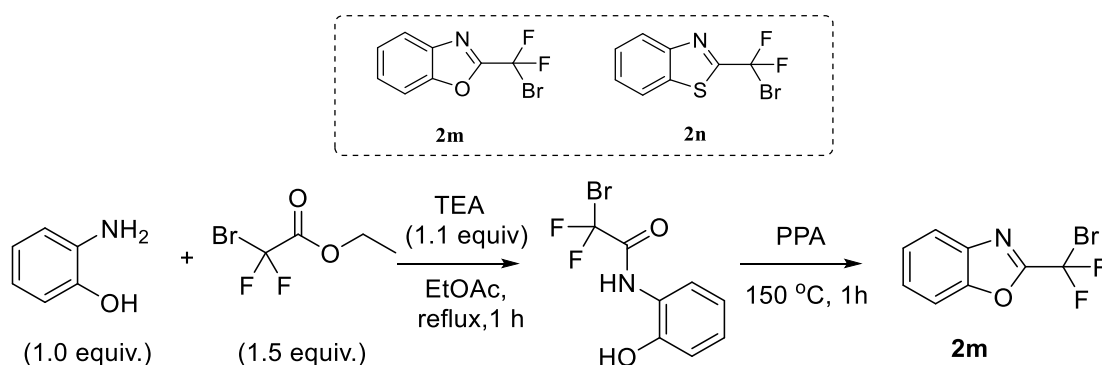

To a solution of 2-aminophenol (1.0 mmol, 1.0 equiv.), TEA (1.1 mmol, 1.1 equiv.) in EtOAc (10 mL) was added ethyl 2-bromo-2,2-difluoroacetate (1.5 mmol, 1.5 equiv.). The reaction was refluxed for 1 h and cooled to room temperature. The reaction mixture was extracted with EtOAc (25 mL x 3), and washed with H<sub>2</sub>O followed by saturated NaCl solution. The organic layers were



dried over anhydrous Na<sub>2</sub>SO<sub>4</sub>, filtered, and evaporated to give residue, which was purified by silica gel column chromatography with petroleum ether/EtOAc (10:1, v/v) as eluents furnishing the intermediate 2-bromo-2,2-difluoro-*N*-(2-hydroxyphenyl)acetamidet. Then placed the intermediate (2.08 g) and PPA (8.04 g) in a dry round-bottom flask. The reaction was stirred at 150 °C for 1 h and cooled to room temperature, then added moderate amount of ice and concentrated ammonia (6 mL, 30% NH<sub>3</sub>·H<sub>2</sub>O). The mixture was extracted with EtOAc (25 mL x 3), and washed with H<sub>2</sub>O followed by saturated NaCl solution. The organic layers were dried over anhydrous Na<sub>2</sub>SO<sub>4</sub>, filtered, and evaporated to give residue, which was purified by silica gel column chromatography with petroleum ether/EtOAc (50:1, v/v) as eluents furnishing the desired product.

### 2-(bromodifluoromethyl)benzo[*d*]oxazole (2m)

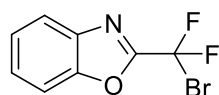

Colorless oil. Yield: 70%. <sup>1</sup>H NMR (300 MHz, DMSO-*d*<sub>6</sub>) δ 8.01 – 7.91 (m, 2H), 7.68 – 7.61 (m, 1H), 7.60 – 7.52 (m, 1H). <sup>19</sup>F NMR (282 MHz, CDCl<sub>3</sub>) δ -51.42. The spectroscopic data of **2m** was consistent with previously reported data.<sup>11</sup>

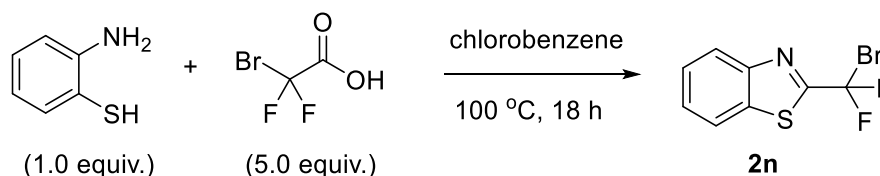

To the solution of 2-aminobenzenethiol (1.0 mmol, 1.0 equiv.) in chlorobenzene (10 mL) was added 2-bromo-2,2-difluoroacetic acid (5.0 mmol, 5.0 equiv.). The reaction mixture was stirred at 100 °C for 18 h, then cooled to room temperature and concentrated under reduced pressure. The mixture was extracted with EtOAc (25 mL x 3), and washed with H<sub>2</sub>O followed by saturated NaCl solution. The organic layers were dried over anhydrous Na<sub>2</sub>SO<sub>4</sub>, filtered, and evaporated to give residue, which was purified by silica gel column chromatography with petroleum ether/EtOAc (50:1, v/v) as eluents furnishing the desired product.

### 2-(bromodifluoromethyl)benzo[*d*]thiazole (2n)

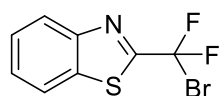

Yellow oil. Yield: 75%. <sup>1</sup>H NMR (300 MHz, DMSO-*d*<sub>6</sub>) δ 8.31 (dd, *J* = 7.3, 2.1 Hz, 1H), 8.23 (dd,

$J = 7.5, 2.1$  Hz, 1H), 7.74 – 7.62 (m, 2H).  $^{19}\text{F}$  NMR (282 MHz,  $\text{CDCl}_3$ )  $\delta$  -43.34. The spectroscopic data of **2n** was consistent with previously reported data.<sup>11</sup>

## 2.6 General procedure A for the synthesis of **3a**

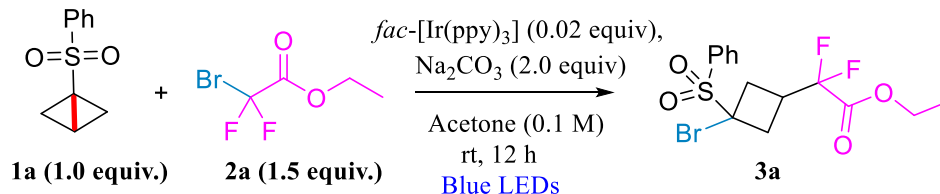

A 10 mL oven-dried reaction vessel was equipped with a magnetic stirrer bar and charged with **1a** (0.2 mmol, 1.0 equiv.),  $\text{Na}_2\text{CO}_3$  (0.4 mmol, 2.0 equiv.) and *fac*-[Ir(ppy)<sub>3</sub>] (0.004 mmol, 0.02 equiv.). The reaction vessel was sealed and degassed via vacuum evacuation and back-filled with nitrogen for three times, then added the **2a** (0.3 mmol, 1.5 equiv.) and anhydrous acetone (2.0 mL). The reaction vessel was exposed to blue LEDs (450 nm, 25 W) irradiation and stirred at room temperature for 12 h. Upon completion of the reaction, the mixture was concentrated under vacuum and then extracted by ethyl acetate (10 mL) and washed with  $\text{H}_2\text{O}$ . The organic layers were concentrated and purified by silica gel column chromatography with petroleum ether/EtOAc (20:1, v/v) as eluents furnishing the product **3a**.

## 2.7 General procedure B for the synthesis of **4a**

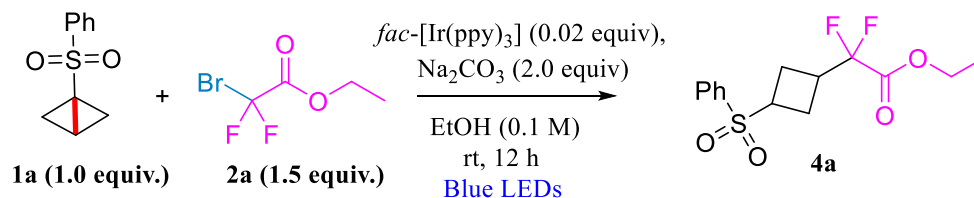

A 10 mL oven-dried reaction vessel was equipped with a magnetic stirrer bar and charged with **1a** (0.2 mmol, 1.0 equiv.),  $\text{Na}_2\text{CO}_3$  (0.4 mmol, 2.0 equiv.) and *fac*-[Ir(ppy)<sub>3</sub>] (0.004 mmol, 0.02 equiv.). The reaction vessel was sealed and degassed via vacuum evacuation and back-filled with nitrogen for three times, then added the **2a** (0.3 mmol, 1.5 equiv.) and anhydrous EtOH (2.0 mL). The reaction vessel was exposed to blue LEDs (450 nm, 25 W) irradiation and stirred at room temperature for 12 h. Upon completion of the reaction, the mixture was concentrated under vacuum and then extracted by ethyl acetate (10 mL) and washed with  $\text{H}_2\text{O}$ . The organic layers were concentrated and purified by silica gel column chromatography with petroleum ether/EtOAc (7:1, v/v) as eluents furnishing the product **4a**.

## 2.8 Gram-scale synthesis

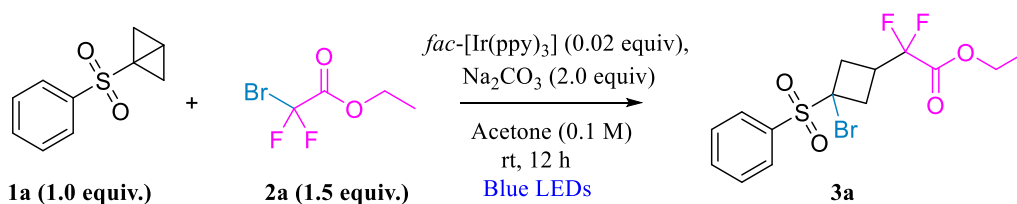

A 100 mL oven-dried reaction vessel was equipped with a magnetic stirrer bar and charged with **1a** (970 mg, 5 mmol, 1.0 equiv.), Na<sub>2</sub>CO<sub>3</sub> (1.06 g, 10 mmol, 2.0 equiv.) and *fac*-[Ir(ppy)<sub>3</sub>] (65 mg, 0.1 mmol, 0.02 equiv.). The reaction vessel was sealed and degassed via vacuum evacuation and back-filled with nitrogen for three times, then added the **2a** (1.52 g, 7.5 mmol, 1.5 equiv.) and anhydrous acetone (50 mL). The reaction vessel was exposed to blue LEDs (450 nm, 25 W) irradiation and stirred at room temperature for 12 h. Upon completion of the reaction, the mixture was concentrated under vacuum and then extracted by ethyl acetate (25 mL) and washed with H<sub>2</sub>O. The organic layers were concentrated and purified by silica gel column chromatography with petroleum ether/EtOAc (20:1, v/v) as eluents furnishing the product **3a** (1.17 g, 59 % yield).

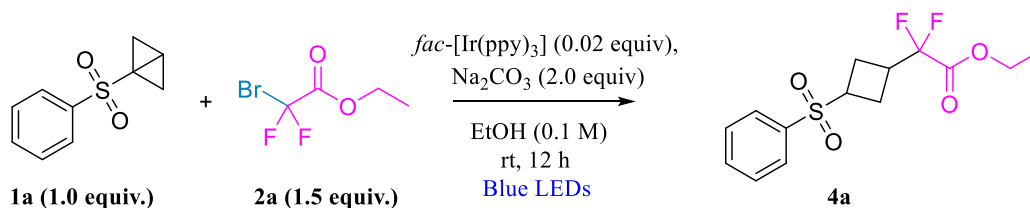

A 100 mL oven-dried reaction vessel was equipped with a magnetic stirrer bar and charged with **1a** (970 mg, 5 mmol, 1.0 equiv.), Na<sub>2</sub>CO<sub>3</sub> (1.06 g, 10 mmol, 2.0 equiv.) and *fac*-[Ir(ppy)<sub>3</sub>] (65 mg, 0.1 mmol, 0.02 equiv.). The reaction vessel was sealed and degassed via vacuum evacuation and back-filled with nitrogen for three times, then added the **2a** (1.52 g, 7.5 mmol, 1.5 equiv.) and anhydrous EtOH (50 mL). The reaction vessel was exposed to blue LEDs (450 nm, 25 W) irradiation and stirred at room temperature for 12 h. Upon completion of the reaction, the mixture was concentrated under vacuum and then extracted by ethyl acetate (25 mL) and washed with H<sub>2</sub>O. The organic layers were concentrated and purified by silica gel column chromatography with petroleum ether/EtOAc (7:1, v/v) as eluents furnishing the product **4a** (1.07 g, 67 % yield).

## 2.9 Late-stage functionalization

### 2-(3-bromo-3-(phenylsulfonyl)cyclobutyl)-2,2-difluoroacetamide (5a)

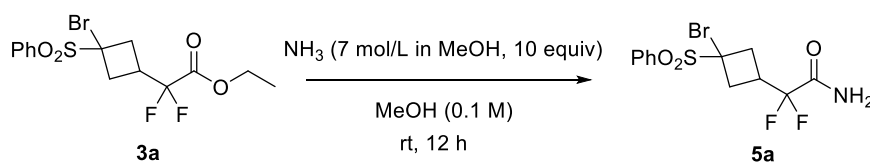

To a solution of compound **3a** (80 mg, 0.20 mmol, 1.0 equiv.) in MeOH (2.0 mL, 0.1 M) was added  $\text{NH}_3$  (7.0 M in MeOH, 0.29 mL, 2.0 mmol, 10.0 equiv.). The reaction was stirred at room temperature for 12 h and quenched with saturated  $\text{NH}_4\text{Cl}$  solution. The reaction mixture was extracted with DCM (10 mL x 3), and washed with  $\text{H}_2\text{O}$  followed by saturated NaCl solution. The organic layers were dried over anhydrous  $\text{Na}_2\text{SO}_4$ , filtered, and evaporated to give residue, which was purified by silica gel column chromatography with petroleum ether/EtOAc (5:1, v/v) as eluents furnishing the desired product as a white solid (58 mg, 78 % yield).

### ethyl 2,2-difluoro-2-(3-(phenylsulfonyl)cyclobutyl)acetate (4a)

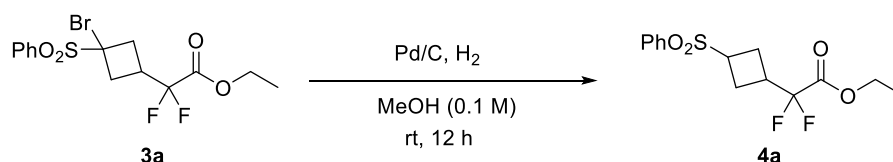

To a solution of compound **3a** (80 mg, 0.20 mmol, 1.0 equiv.) in MeOH (2.0 mL, 0.1 M) was added 10 %  $\text{Pd/C}$  (5 mg). The reaction was stirred at room temperature for 12 h under a hydrogen atmosphere. The desired product **4a** was obtained as a light-yellow solid by filtering mixture and evaporating the filtrate (58 mg, 90 % yield).

### 2,2-difluoro-2-(3-(phenylsulfonyl)cyclobutyl)acetic acid (5b)

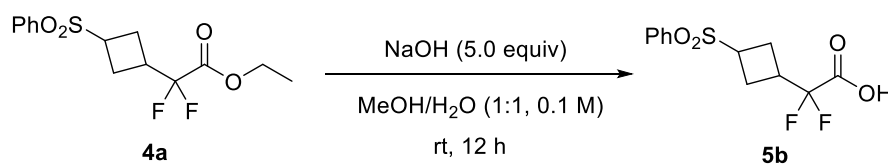

To a solution of compound **4a** (63.6 mg, 0.20 mmol, 1.0 equiv.) in MeOH (1.0 mL) was added  $\text{NaOH}$  solution (1.0 M, 1.0 mL) at room temperature. The reaction was stirred at room temperature for 12 h and concentrated *in vacuo*, then neutralized to pH 6-7 with 1N  $\text{HCl}$  solution. The reaction mixture was extracted with DCM (10 mL x 3), and washed with  $\text{H}_2\text{O}$  followed by saturated NaCl solution. The organic layers were dried over anhydrous  $\text{Na}_2\text{SO}_4$ , filtered, and evaporated to give residue, which was purified by silica gel column chromatography with DCM/MeOH/AcOH (30:1:0.1, v/v) as eluents furnishing the desired product as a white solid (38 mg, 66 % yield).

## 2.10 Applications in ATR inhibitors

### Scheme S2. Synthesis of compound **5n**<sup>a</sup>

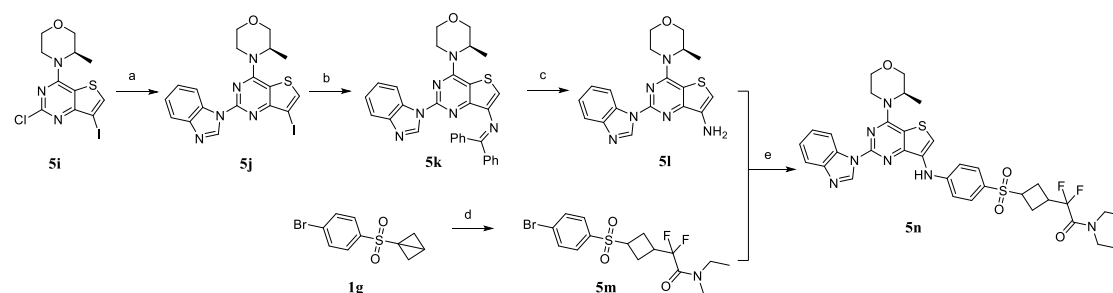

<sup>a</sup> *Reagents and conditions*: (a) benzimidazole, K<sub>2</sub>CO<sub>3</sub>, DMF, 110 °C, 12 h; (b) benzophenone imine, Pd<sub>2</sub>(dba)<sub>3</sub>, Xantphos, Cs<sub>2</sub>CO<sub>3</sub>, 1,4-dioxane, 105 °C, 12 h; (c) hydroxylamine hydrochloride, AcONa, rt, 24 h; (d) 2-bromo-*N,N*-diethyl-2,2-difluoroacetamide (**1x**), *fac*-[Ir(ppy)<sub>3</sub>], Na<sub>2</sub>CO<sub>3</sub>, EtOH, Blue LEDs, rt, 12 h; (e) Pd<sub>2</sub>(dba)<sub>3</sub>, Xantphos, Cs<sub>2</sub>CO<sub>3</sub>, 1,4-dioxane, 105 °C, 12 h.

#### (*R*)-4-(2-(1*H*-benzo[*d*]imidazol-1-yl)-7-iodothieno[3,2-*d*]pyrimidin-4-yl)-3-methylmorpholine (**5j**)

A mixture of benzimidazole (224 mg, 1.90 mmol) and K<sub>2</sub>CO<sub>3</sub> (524 mg, 3.79 mmol) in DMF (15 mL) was added **5i** (500 mg, 1.26 mmol). The reaction mixture was stirred at 110 °C for 12 h and cooled to room temperature. Then extracted by EtOAc and washed with H<sub>2</sub>O and brine. The combined organic layers were dried over anhydrous Na<sub>2</sub>SO<sub>4</sub>, filtered, and concentrated under reduced pressure. The residue was purified by silica gel chromatography to give **5j** as a white solid (yield, 74 %). <sup>1</sup>H NMR (300 MHz, CDCl<sub>3</sub>) δ 9.07 (s, 1H), 8.93 (d, *J* = 7.9 Hz, 1H), 7.99 (s, 1H), 7.85 (d, *J* = 8.2 Hz, 1H), 7.47 (t, *J* = 7.7 Hz, 1H), 7.38 (t, *J* = 7.6 Hz, 1H), 4.86 – 4.73 (m, 1H), 4.58 – 4.45 (m, 1H), 4.21 – 4.10 (m, 1H), 3.96 – 3.82 (m, 2H), 3.79 – 3.59 (m, 2H), 1.51 (d, *J* = 6.8 Hz, 3H).

#### (*R*)-*N*-(2-(1*H*-benzo[*d*]imidazol-1-yl)-4-(3-methylmorpholino)thieno[3,2-*d*]pyrimidin-7-yl)-1,1-diphenylmethanimine (**5k**)

A mixture of **5j** (300 mg, 0.63 mmol), Pd<sub>2</sub>(dba)<sub>3</sub> (29 mg, 0.031 mmol), Xantphos (36 mg, 0.062 mmol) and Cs<sub>2</sub>CO<sub>3</sub> (614 mg, 1.89 mmol) in anhydrous 1,4-dioxane (15 mL) was added benzophenone imine (171 mg, 0.94 mmol). The reaction mixture was refluxed for 12 h under a nitrogen atmosphere then cooled to room temperature and concentrated under reduced pressure. Then extracted by EtOAc and washed with H<sub>2</sub>O and brine. The combined organic layers were dried

over anhydrous Na<sub>2</sub>SO<sub>4</sub>, filtered, and concentrated under reduced pressure. The residue was purified by silica gel chromatography to give **5k** as a yellow solid (yield, 62 %). <sup>1</sup>H NMR (400 MHz, CDCl<sub>3</sub>) δ 9.50 (s, 1H), 9.08 (d, *J* = 7.9 Hz, 1H), 8.33 (d, *J* = 7.1 Hz, 2H), 8.26 (d, *J* = 7.9 Hz, 1H), 7.98 (t, *J* = 7.3 Hz, 1H), 7.90 (t, *J* = 7.6 Hz, 2H), 7.74 (t, *J* = 7.6 Hz, 1H), 7.70 – 7.60 (m, 7H), 5.25 – 5.15 (m, 1H), 4.92 – 4.84 (m, 1H), 4.56 – 4.52 (m, 1H), 4.33 – 4.22 (m, 2H), 4.17 – 3.98 (m, 2H), 1.89 (d, *J* = 6.8 Hz, 3H).

**(R)-2-(1H-benzo[d]imidazol-1-yl)-4-(3-methylmorpholino)thieno[3,2-d]pyrimidin-7-amine (5l)**

A mixture of **5k** (250 mg, 0.47 mmol) and AcONa (97 mg, 1.18 mmol) in MeOH (15 mL) was added hydroxylamine hydrochloride (66 mg, 0.94 mmol). The reaction mixture was stirred at room temperature for 12 h. Then extracted by EtOAc and washed with H<sub>2</sub>O and brine. The combined organic layers were dried over anhydrous Na<sub>2</sub>SO<sub>4</sub>, filtered, and concentrated under reduced pressure. The residue was purified by silica gel chromatography to give **5l** as a white solid (yield, 80 %). <sup>1</sup>H NMR (300 MHz, DMSO-*d*<sub>6</sub>) δ 9.29 (s, 1H), 8.69 (d, *J* = 8.1 Hz, 1H), 7.76 (d, *J* = 7.2 Hz, 1H), 7.46 – 7.39 (m, 1H), 7.38 – 7.30 (m, 1H), 6.68 (s, 1H), 5.41 (s, 2H), 4.89 – 4.73 (m, 1H), 4.59 – 4.44 (m, 1H), 4.14 – 3.99 (m, 1H), 3.88 – 3.72 (m, 2H), 3.67 – 3.51 (m, 2H), 1.40 (d, *J* = 6.8 Hz, 3H).

**2-(3-((4-bromophenyl)sulfonyl)cyclobutyl)-N,N-diethyl-2,2-difluoroacetamide (5m)**

Compound **5m** was synthesized from **1g** and **1x** by general procedure B for the synthesis of **5m** as a white solid (yield, 71 %). <sup>1</sup>H NMR (300 MHz, CDCl<sub>3</sub>) δ 7.83 – 7.50 (m, 4H), 3.78 – 3.63 (m, 1H), 3.51 (q, *J* = 7.1 Hz, 2H), 3.33 (q, *J* = 7.1 Hz, 2H), 3.23 – 3.01 (m, 1H), 2.72 – 2.56 (m, 2H), 2.38 – 2.25 (m, 2H), 1.19 (t, *J* = 7.0 Hz, 3H), 1.12 (t, *J* = 7.1 Hz, 3H). <sup>19</sup>F NMR (282 MHz, CDCl<sub>3</sub>) δ -108.64.

**(R)-2-(3-(((4-((2-(1H-benzo[d]imidazol-1-yl)-4-(3-methylmorpholino)thieno[3,2-d]pyrimidin-7-yl)amino)phenyl)sulfonyl)cyclobutyl)-N,N-diethyl-2,2-difluoroacetamide (5n)**

Compound **5n** was synthesized from **5l** and **5m** by a synthetic procedure similar to that of **5n** as a beige solid (yield, 65 %). <sup>1</sup>H NMR (300 MHz, CDCl<sub>3</sub>) δ 9.11 (s, 1H), 8.43 (d, *J* = 9.0 Hz, 1H), 7.88 – 7.77 (m, 3H), 7.46 – 7.29 (m, 5H), 7.27 (s, 1H), 4.92 – 4.75 (m, 1H), 4.63 – 4.47 (m, 1H), 4.22 – 4.10 (m, 1H), 3.99 – 3.81 (m, 2H), 3.79 – 3.60 (m, 3H), 3.51 (q, *J* = 7.1 Hz, 2H), 3.33 (q, *J* = 7.1 Hz, 2H), 3.21 – 2.99 (m, 1H), 2.75 – 2.57 (m, 2H), 2.40 – 2.23 (m, 2H), 1.53 (d, *J* = 6.8 Hz, 3H), 1.23 – 1.15 (m, 3H), 1.12 (t, *J* = 7.1 Hz, 3H). <sup>13</sup>C NMR (75 MHz, CDCl<sub>3</sub>) δ 162.1 (t, <sup>2</sup>*J*<sub>C-F</sub> =

29.3 Hz), 158.4, 154.5, 152.7, 147.0, 144.8, 142.4, 132.9, 132.0, 130.6, 128.4, 124.5, 123.7, 120.5, 117.9 (t,  $^1J_{C-F}$  = 255.0 Hz), 115.6, 114.9, 110.1, 107.7, 71.0, 66.9, 52.9, 49.7, 41.6, 41.2, 33.1 (t,  $^2J_{C-F}$  = 27.0 Hz), 23.6 (t,  $^3J_{C-F}$  = 5.3 Hz), 15.5, 14.3, 12.4.  $^{19}\text{F}$  NMR (282 MHz,  $\text{CDCl}_3$ )  $\delta$  -108.48. HRMS (ESI) for  $\text{C}_{34}\text{H}_{37}\text{F}_2\text{N}_7\text{NaO}_4\text{S}_2$   $[\text{M} + \text{Na}]^+$ , calcd: 732.2188, found: 732.2209.

### 3. Reaction optimization

#### 3.1 Optimization of reaction conditions for the preparation of 3a:

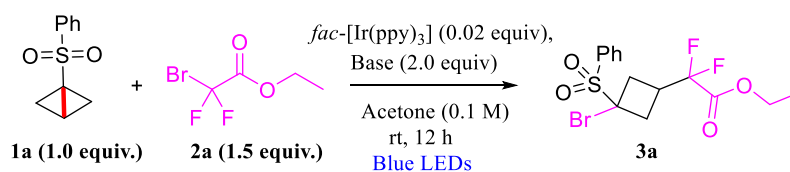

**Table S1. Screening of base<sup>a</sup>**

| Entry | Base                                | Yield (%) <sup>b</sup> |
|-------|-------------------------------------|------------------------|
| 1     | DBU                                 | 0                      |
| 2     | pyridine                            | 0                      |
| 3     | DIPEA                               | 0                      |
| 4     | <b>Na<sub>2</sub>CO<sub>3</sub></b> | <b>62</b>              |
| 5     | NaHCO <sub>3</sub>                  | 60                     |
| 6     | K <sub>2</sub> CO <sub>3</sub>      | 55                     |
| 7     | K <sub>3</sub> PO <sub>4</sub>      | 53                     |
| 8     | CS <sub>2</sub> CO <sub>3</sub>     | trace                  |
| 9     | <i>t</i> -BuONa                     | 0                      |
| 10    | AcONa                               | 52                     |

<sup>a</sup> Reactions were carried out with **1a** (0.2 mmol), **2a** (0.3 mmol), photocatalyst (0.004 mmol) and base (0.4 mmol) in acetone (2.0 mL) at room temperature under nitrogen atmosphere for 12 h.

<sup>b</sup> All yields are of isolated products.

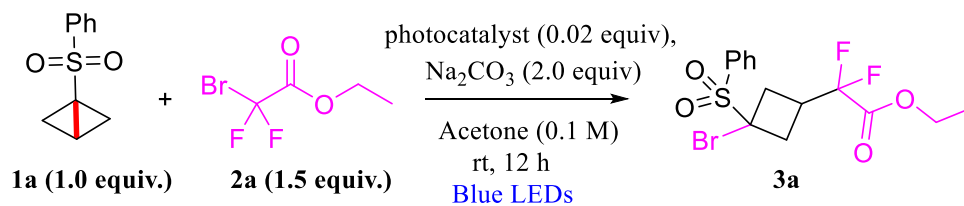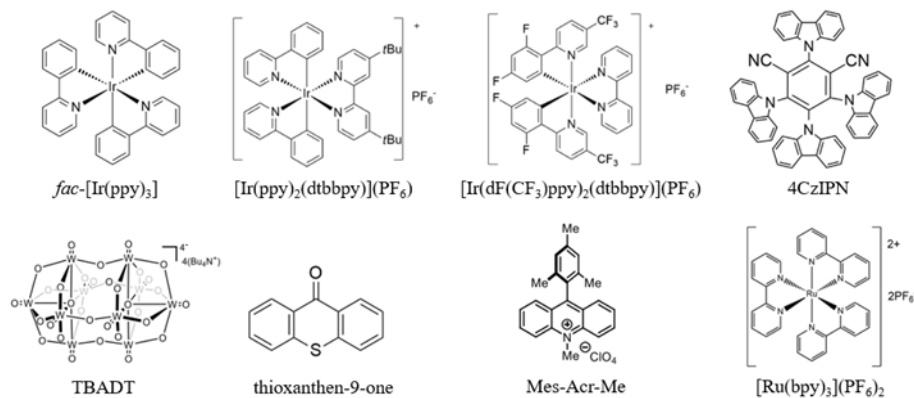

**Table S2. Screening of photocatalyst<sup>a</sup>**

| Entry    | Base                                                                  | Yield (%) <sup>b</sup> |
|----------|-----------------------------------------------------------------------|------------------------|
| <b>1</b> | <i>fac</i> -[Ir(ppy) <sub>3</sub> ]                                   | <b>62</b>              |
| 2        | [Ir(ppy) <sub>2</sub> (dtbbpy)](PF <sub>6</sub> )                     | 0                      |
| 3        | [Ir(dF(CF <sub>3</sub> )ppy) <sub>2</sub> (dtbbpy)](PF <sub>6</sub> ) | 0                      |
| 4        | 4CzIPN                                                                | 0                      |
| 5        | TBADT                                                                 | 0                      |
| 6        | thioxanthen-9-one                                                     | N.R. <sup>c</sup>      |
| 7        | Mes-Acr-Me                                                            | N.R.                   |
| 8        | [Ru(bpy) <sub>3</sub> ](PF <sub>6</sub> ) <sub>2</sub>                | trace                  |

<sup>a</sup> Reactions were carried out with **1a** (0.2 mmol), **2a** (0.3 mmol), photocatalyst (0.004 mmol) and base (0.4 mmol) in acetone (2.0 mL) at room temperature under nitrogen atmosphere for 12 h.

<sup>b</sup> All yields are of isolated products.

<sup>c</sup> N.R. = No Reaction.



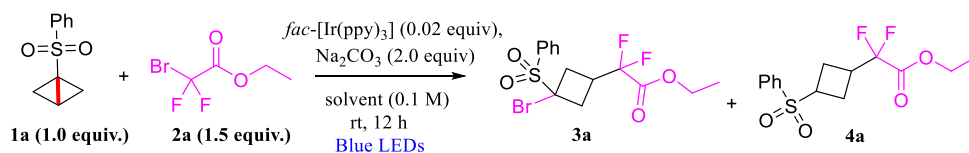

**Table S3. Screening of solvent <sup>a</sup>**

| Entry | Solvent     | Yield of <b>3a/4a</b> (%) <sup>b</sup> |
|-------|-------------|----------------------------------------|
| 1     | Acetone     | 62/0                                   |
| 2     | DCM         | trace/0                                |
| 3     | EtOAc       | 10/0                                   |
| 4     | THF         | 20/50                                  |
| 5     | 2-MeTHF     | 20/47                                  |
| 6     | MeCN        | 58/0                                   |
| 7     | toluene     | 43/22                                  |
| 8     | MeOH        | 0/trace                                |
| 9     | EtOH        | 0/72                                   |
| 10    | 1,4-dioxane | trace/56                               |
| 11    | DMF         | 0/46                                   |
| 12    | DMSO        | 0/0                                    |

<sup>a</sup> Reactions were carried out with **1a** (0.2 mmol), **2a** (0.3 mmol), *fac*-[Ir(ppy)<sub>3</sub>] (0.004 mmol) and base (0.4 mmol) in solvent (2.0 mL) at room temperature under nitrogen atmosphere for 12 h.

<sup>b</sup> All yields are of isolated products.

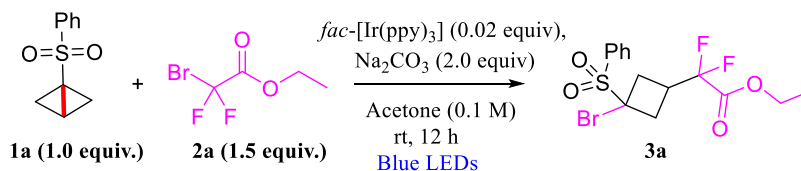

**Table S4. Control experiments <sup>a</sup>**

| Entry | Deviation                       | Yield (%) <sup>b</sup> |
|-------|---------------------------------|------------------------|
| 1     | without base                    | trace                  |
| 2     | without light                   | N.R. <sup>c</sup>      |
| 3     | 390 nm purple LEDs              | 26                     |
| 4     | without photocatalyst           | N.R.                   |
| 5     | under air                       | 0                      |
| 6     | with a drop of H <sub>2</sub> O | 34                     |

<sup>a</sup> Reactions were carried out with **1a** (0.2 mmol), **2a** (0.3 mmol), *fac*-[Ir(ppy)<sub>3</sub>] (0.004 mmol) and base (0.4 mmol) in solvent (2.0 mL) at room temperature under nitrogen atmosphere for 12 h.

<sup>b</sup> All yields are of isolated products.

<sup>c</sup> N.R. = No Reaction.

### 3.2 Optimization of reaction conditions for the preparation of 4a:

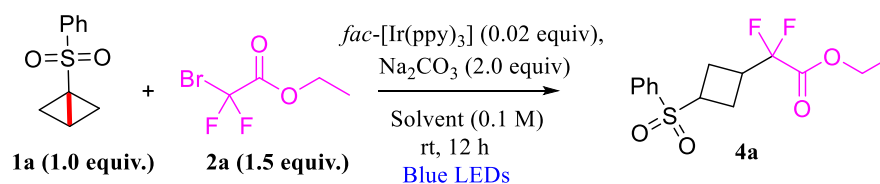

Table S5. Screening of solvent <sup>a</sup>

| Entry | Solvent        | Yield of 7a (%) <sup>b</sup> |
|-------|----------------|------------------------------|
| 1     | EtOH           | 72                           |
| 2     | <i>i</i> -PrOH | 55                           |
| 3     | <i>n</i> -PrOH | 56                           |
| 4     | <i>n</i> -BuOH | 50                           |
| 5     | <i>s</i> -BuOH | 67                           |
| 6     | <i>t</i> -BuOH | 18                           |

<sup>a</sup> Reactions were carried out with **1a** (0.2 mmol), **2a** (0.3 mmol), *fac*-[Ir(ppy)<sub>3</sub>] (0.004 mmol) and base (0.4 mmol) in solvent (2.0 mL) at room temperature under nitrogen atmosphere for 12 h.

<sup>b</sup> All yields are of isolated products.

## 4. Mechanistic Studies

### 4.1 Radical trapping experiments

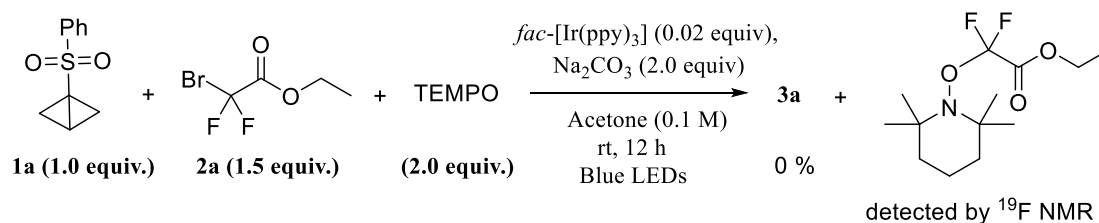

A 10 mL oven-dried reaction vessel was equipped with a magnetic stirrer bar and charged with **1a** (0.2 mmol, 1.0 equiv.), TEMPO (0.4 mmol, 2.0 equiv.), Na<sub>2</sub>CO<sub>3</sub> (0.4 mmol, 2.0 equiv.) and *fac*-[Ir(ppy)<sub>3</sub>] (0.004 mmol, 0.02 equiv.). The reaction vessel was sealed and degassed via vacuum evacuation and back-filled with nitrogen for three times, then added the **2a** (0.3 mmol, 1.5 equiv.) and anhydrous acetone (2 mL). The reaction vessel was exposed to blue LEDs (450 nm, 25 W) irradiation and stirred at room temperature for 12 h. The reaction mixture was concentrated under vacuum then taken and monitored by <sup>19</sup>F NMR. (PhCF<sub>3</sub> was used as an internal standard.)<sup>13</sup>

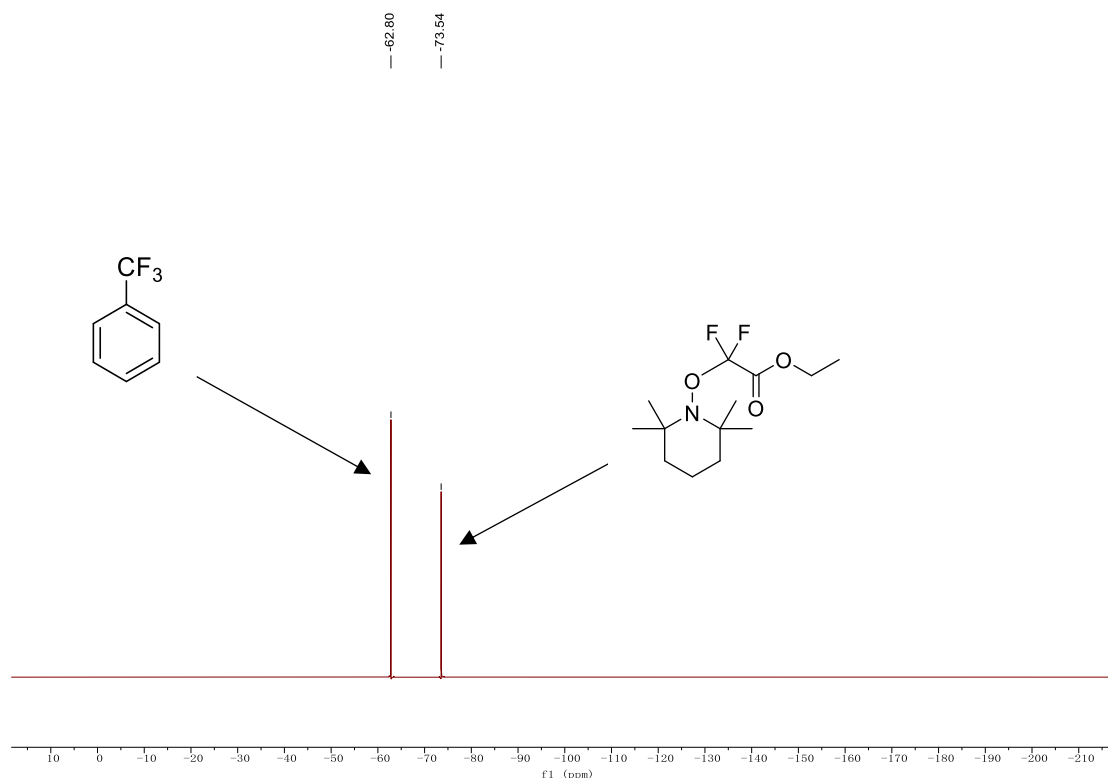

**Results and Conclusion:** TEMPO-adduct product was detected by  $^{19}\text{F}$  NMR spectrum, no desired product was obtained in the presence of a radical scavenger. This experiment indicates that the reaction likely proceeds through a radical mechanism.

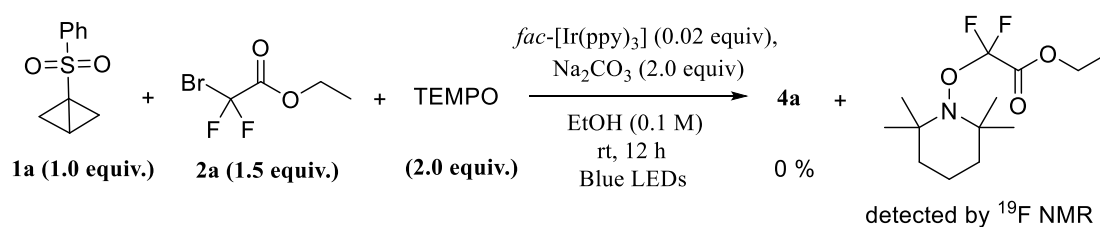

A 10 mL oven-dried reaction vessel was equipped with a magnetic stirrer bar and charged with **1a** (0.2 mmol, 1.0 equiv.), TEMPO (0.4 mmol, 2.0 equiv.),  $\text{Na}_2\text{CO}_3$  (0.4 mmol, 2.0 equiv.) and *fac*-[Ir(ppy) $_3$ ] (0.004 mmol, 0.02 equiv.). The reaction vessel was sealed and degassed via vacuum evacuation and back-filled with nitrogen for three times, then added the **2a** (0.3 mmol, 1.5 equiv.) and anhydrous EtOH (2 mL). The reaction vessel was exposed to blue LEDs (450 nm, 25 W) irradiation and stirred at room temperature for 12 h. The reaction mixture was concentrated under vacuum then taken and monitored by  $^{19}\text{F}$  NMR. (PhCF $_3$  was used as an internal standard.)<sup>13</sup>

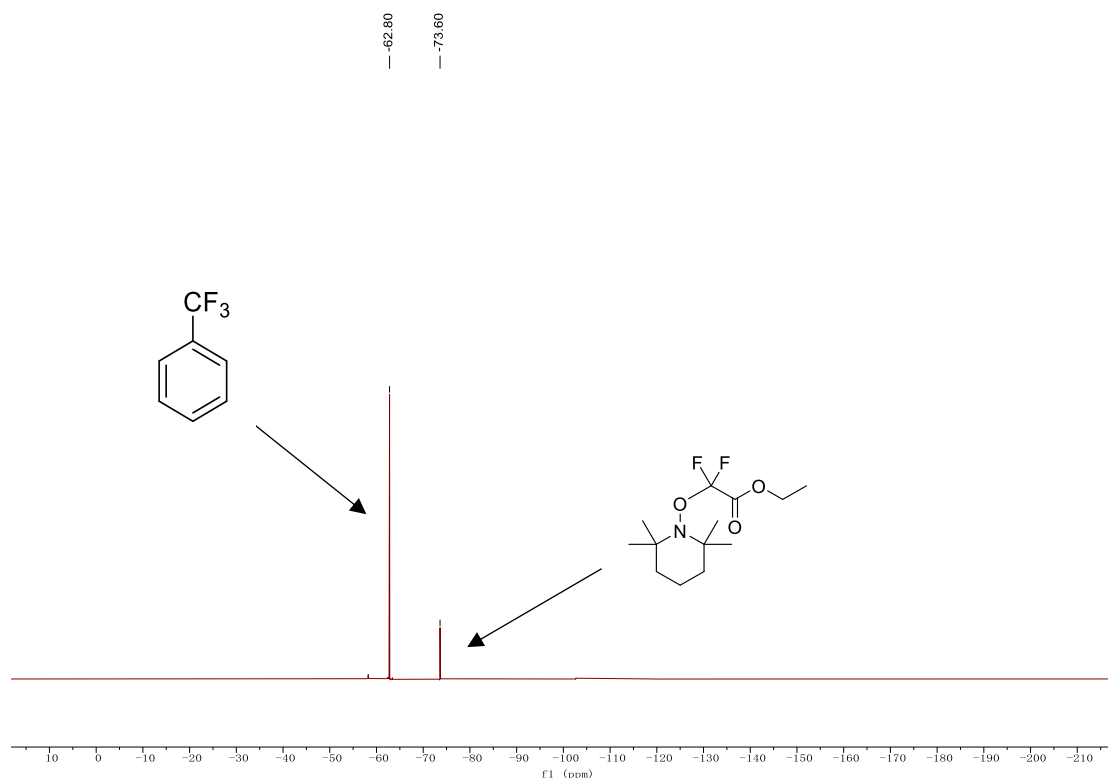

**Results and Conclusion:** TEMPO-adduct product was detected by  $^{19}\text{F}$  NMR spectrum, no desired product was obtained in the presence of a radical scavenger. This experiment indicates that the reaction likely proceeds through a radical mechanism.

#### 4.2 Light on/off experiments

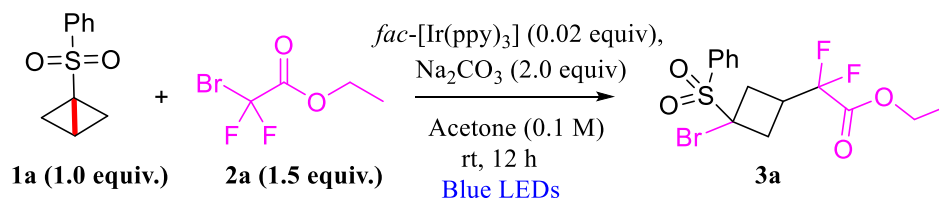

A 10 mL oven-dried reaction vessel was equipped with a magnetic stirrer bar and charged with **1a** (0.2 mmol, 1.0 equiv.),  $\text{Na}_2\text{CO}_3$  (0.4 mmol, 2.0 equiv.) and  $\text{fac-}[\text{Ir}(\text{ppy})_3]$  (0.004 mmol, 0.02 equiv.). The reaction vessel was sealed and degassed via vacuum evacuation and back-filled with nitrogen for three times, then added the **2a** (0.3 mmol, 1.5 equiv.) and anhydrous acetone (2 mL). The reaction vessel was exposed to blue LEDs (450 nm, 25 W) irradiation and stirred at room temperature for 0.5 h. The light was then removed for 0.5 h. Repeat those lights on and off operation for 3 h. The reaction was tracked with LC-MS at each 0.5 hours.

| Light condition |   | on  | off | on  | off | on  | off |
|-----------------|---|-----|-----|-----|-----|-----|-----|
| Time (h)        | 0 | 0.5 | 1.0 | 1.5 | 2.0 | 2.5 | 3.0 |
| Yield           | 0 | 32  | 34  | 44  | 44  | 51  | 53  |

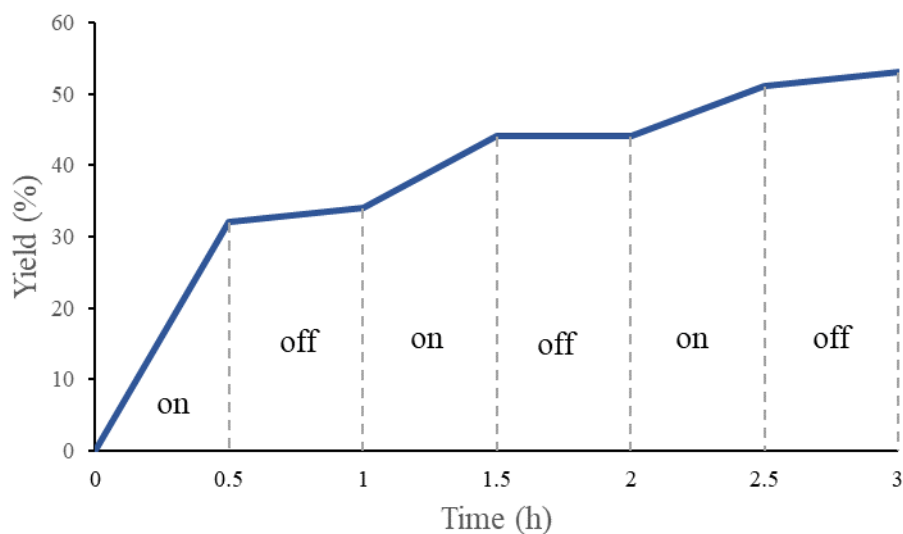

**Fig. S2.** Light on/off experiment.

**Results and Conclusion:** The light on/off experiment indicated that the reaction shows photo-irradiation dependence and may not follow a radical chain mechanism.

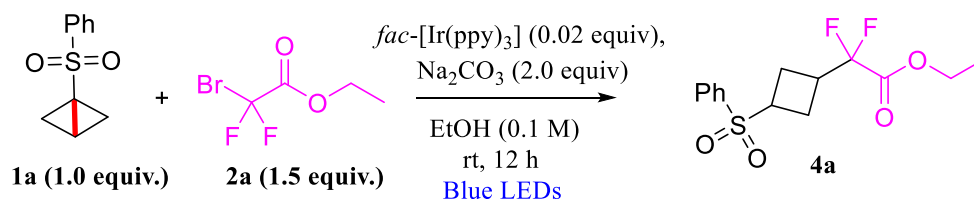

A 10 mL oven-dried reaction vessel was equipped with a magnetic stirrer bar and charged with **1a** (0.2 mmol, 1.0 equiv.),  $\text{Na}_2\text{CO}_3$  (0.4 mmol, 2.0 equiv.) and *fac*-[Ir(ppy)<sub>3</sub>] (0.004 mmol, 0.02 equiv.). The reaction vessel was sealed and degassed via vacuum evacuation and back-filled with nitrogen for three times, then added the **2a** (0.3 mmol, 1.5 equiv.) and anhydrous EtOH (2 mL). The reaction vessel was exposed to blue LEDs (450 nm, 25 W) irradiation and stirred at room temperature for 0.5 h. The light was then removed for 0.5 h. Repeat those lights on and off operation for 3 h. The reaction was tracked with LC-MS at each 0.5 hours.

| Light condition | on | off | on  | off | on  | off |     |
|-----------------|----|-----|-----|-----|-----|-----|-----|
| Time (h)        | 0  | 0.5 | 1.0 | 1.5 | 2.0 | 2.5 | 3.0 |
| Yield           | 0  | 37  | 37  | 47  | 47  | 59  | 59  |

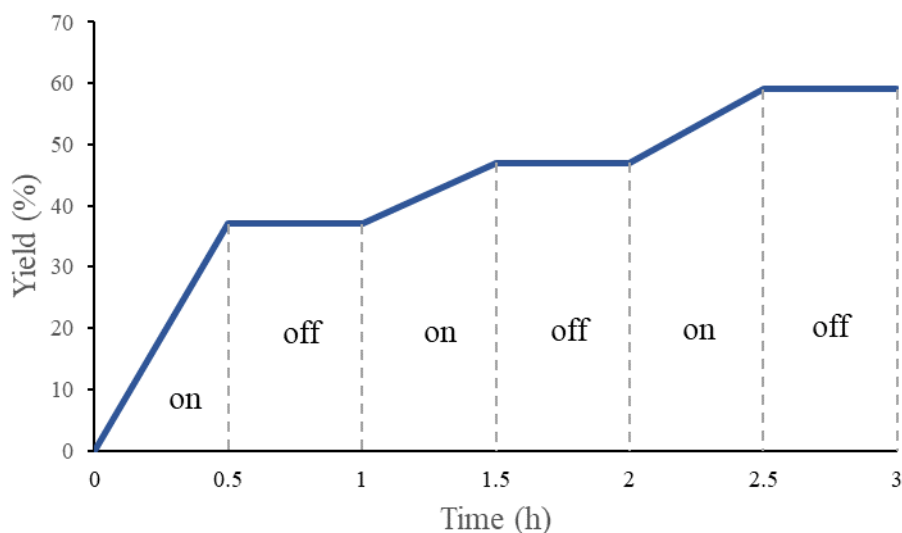

**Fig. S3.** Light on/off experiment.

*Results and Conclusion:* The light on/off experiment indicated that the reaction shows photo-irradiation dependence and may not follow a radical chain mechanism.

### 4.3 Deuterium labeling experiments

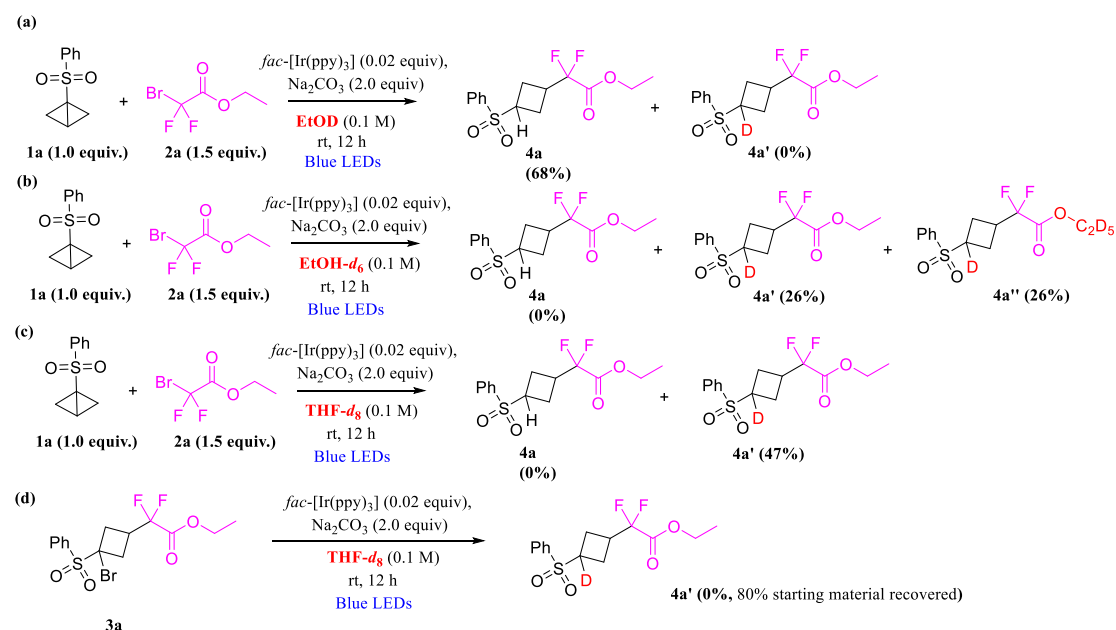

*Results and Conclusion:* When EtOD was used as solvent, no deuterated product **4a'** was tracked. While the deuterated product **4a'** and its transesterification product **4a''** were recorded with full deuterated EtOH-*d*<sub>6</sub>. In the screening process, solvents bearing C-H bond adjacent to heteroatom were conducive to the formation of difluoromethylation product **4a**. The deuterated product **4a'** was produced in 47% yield using the THF-*d*<sub>8</sub>, which further confirmed the

borrowed hydrogen coming from solvents.

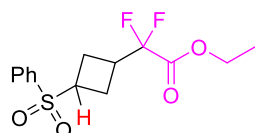

4a (EtOD as solvent)

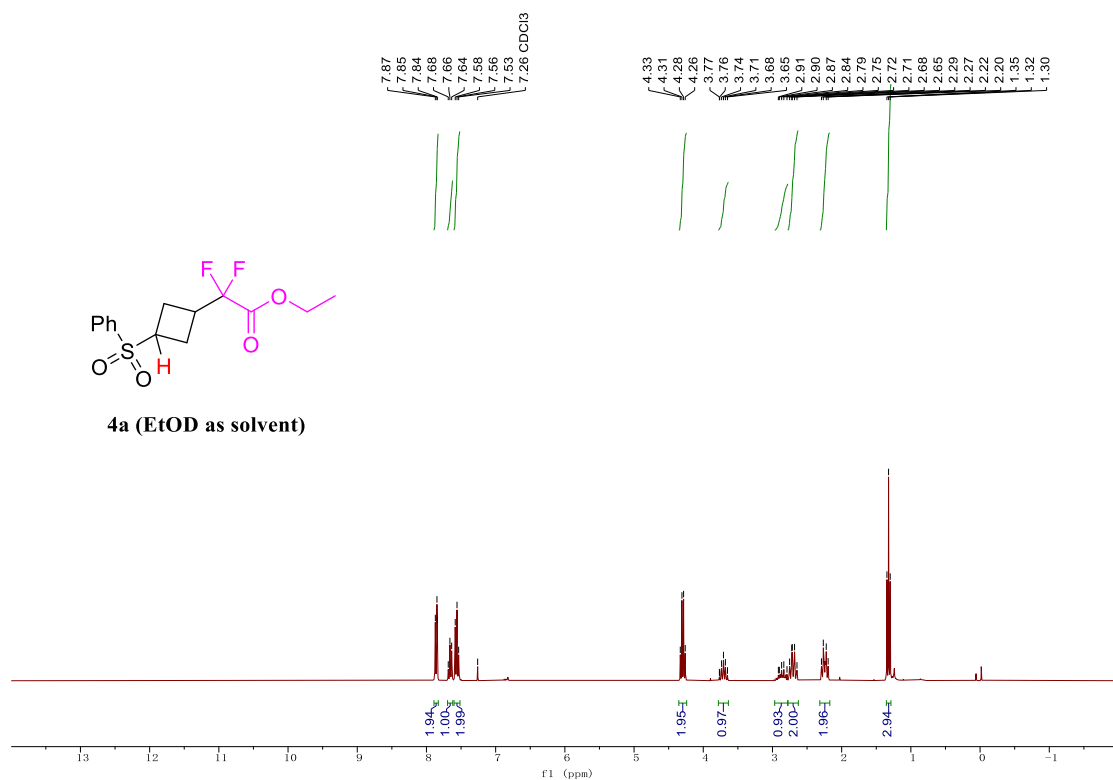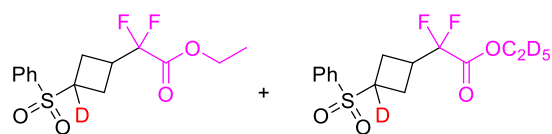

4a' + 4a'' (EtOH- $d_6$  as solvent)

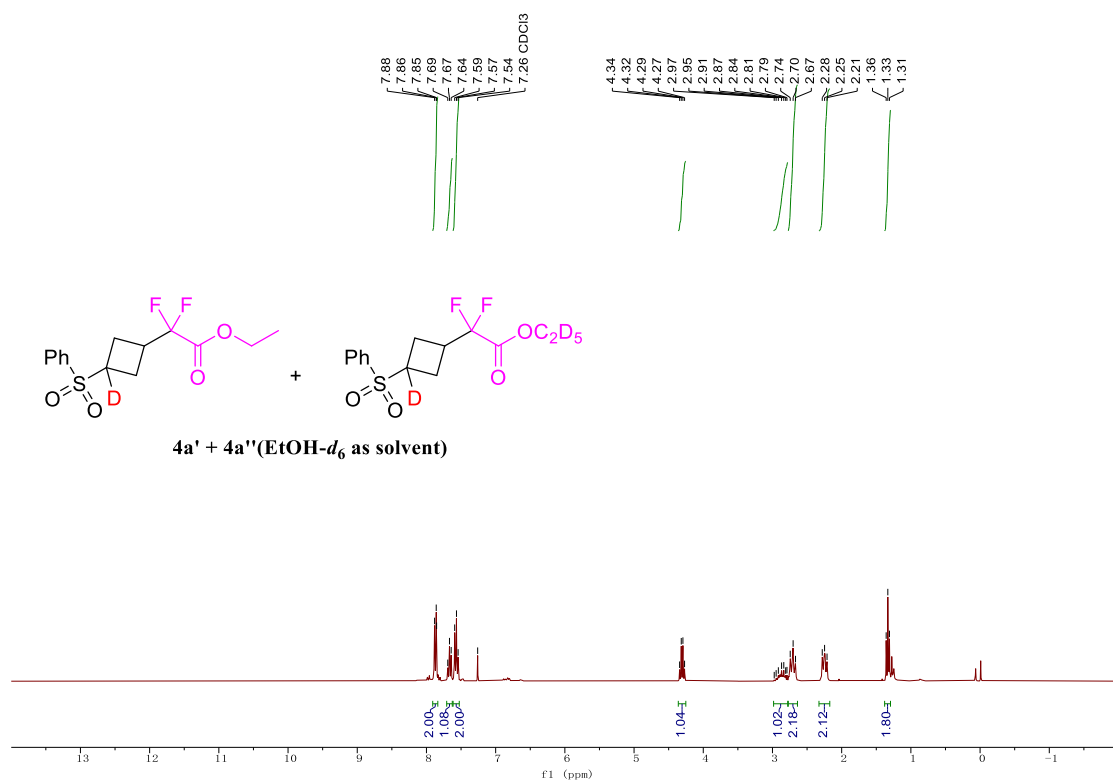

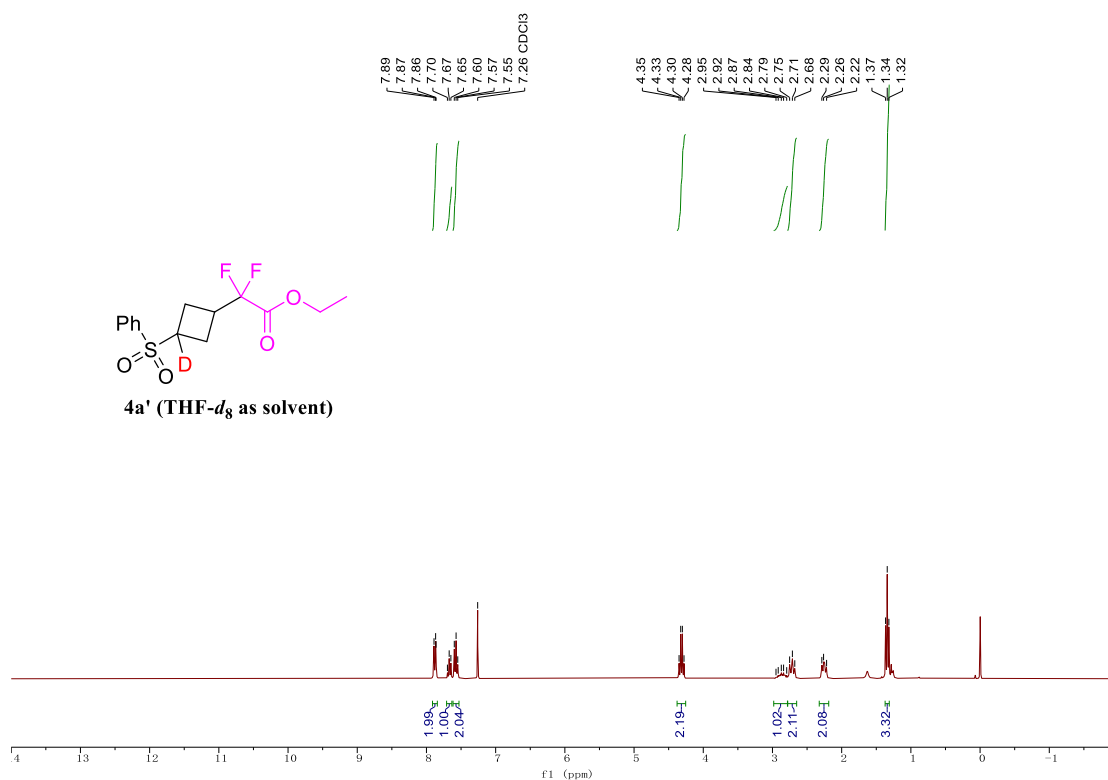

#### 4.4 DFT calculations

All density functional theory (DFT) calculations were performed with the Gaussian 16 program package.<sup>14</sup>

Full geometry optimizations were operated to locate all of the stationary points, using (U)M06-2X density functional theory method<sup>15-16</sup> with def2SVP<sup>17</sup> basis for all atoms, and a polarized continuum model based on solute electron density (PCM)<sup>18-19</sup> was employed to simulate the solvent effect of acetone or ethanol solvent in optimization. The spin-restricted DFT method was used for closed-shell species and the spin-unrestricted DFT method for radical species and open-shell singlet species (TS1-Br, TS1-H<sub>a</sub>, TS1-H<sub>b</sub>) with the “guess (mix, always)” keyword. In the meantime, the stability of the density function theory (DFT) wave-function of the auxiliary Kohn–Sham determinant was examined.<sup>20</sup> Harmonic vibrational frequency calculations were conducted to characterize all stationary point. Herein, minima have zero imaginary frequencies, and transition states have only one imaginary vibrational frequency. Intrinsic reaction coordinate (IRC) calculations<sup>21-22</sup> were implemented to track minimum energy paths connecting each transition state structure to two corresponding minima. The single point energy calculations of all stationary points were performed at the (U)M06-2X/def2TZVP,SDD level using the PCM-SMD model with acetone or ethanol as solvent. This theoretical level is denoted as PCM-SMD (acetone/ethanol)-(U)M06-



Unless mentioned otherwise, the Gibbs free energy of formation ( $\Delta G$ ) is obtained at the PCM-SMD (acetone/ethanol)-(U)M06-2X/def2TZVP level.

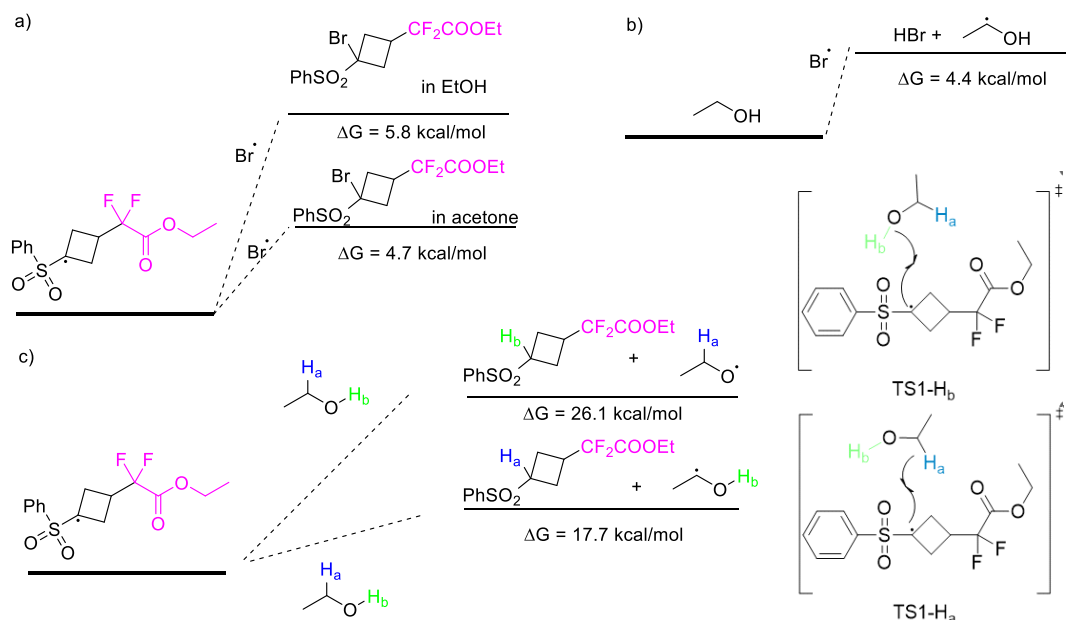

**Scheme S3. DFT calculations**

**Table S6.** Thermal correction to Gibbs free energy ( $G_0$ , hartree), single point energies (SP-E, hartree), sum of electronic and thermal free energies ( $G_c$ , hartree) with the addition of SP-E as well as thermal corrections, and relative Gibbs free energies ( $\Delta G$ , kcal mol<sup>-1</sup>) of various species with respect to TS1-Br for radical coupling and radical addition reactions at the PCM-SMD (acetone/ethanol)-(U)M06-2X/def2TZVP. IF represents imaginary frequencies (cm<sup>-1</sup>).

| Species             | $G_0$    | SP-E         | $G_c(G_0+SP-E)$ | $\Delta G$ | IF       |
|---------------------|----------|--------------|-----------------|------------|----------|
| Solvent: EtOH       |          |              |                 |            |          |
| Br                  | -0.01683 | -2574.154372 | -2574.171202    |            |          |
| EtOH                | 0.05507  | -155.036443  | -154.981373     |            |          |
| Int I               | 0.222813 | -1441.228673 | -1441.00586     |            |          |
| P1                  | 0.224901 | -4015.486781 | -4015.26188     |            |          |
| TS1-Br              | 0.219643 | -4015.387473 | -4015.16783     | 5.79308    | -86.59   |
| TS1-H <sub>b</sub>  | 0.291753 | -1596.237465 | -1595.945712    | 26.0544275 | -1759.19 |
| TS1-H <sub>a</sub>  | 0.293404 | -1596.252483 | -1595.959079    | 17.666635  | -1372.19 |
| TS2                 | 0.046353 | -2729.191868 | -2729.145515    | 4.43015    | -175.25  |
| Solvent: acetone    |          |              |                 |            |          |
| Br                  | -0.01683 | -2574.153976 | -2574.170806    |            |          |
| Int I               | 0.22279  | -1441.228974 | -1441.006184    |            |          |
| P1                  | 0.224895 | -4015.487142 | -4015.262247    |            |          |
| TS1-Br              | 0.219401 | -4015.388964 | -4015.169563    | 4.6604425  | -87.73   |
| Solvent: 1-propanol |          |              |                 |            |          |
| 1-propanol          | 0.081307 | -194.338495  | -194.257188     |            |          |
| Int I               | 0.222818 | -1441.228062 | -1441.005244    |            |          |
| TS1-H <sub>a</sub>  | 0.320068 | -1635.542199 | -1635.222131    | 25.268727  | -1388.91 |
| TS2                 | 0.073001 | -2768.499527 | -2768.426526    | 1.17       | -162.89  |
| Solvent: 1-butanol  |          |              |                 |            |          |

|                              |          |              |              |           |          |
|------------------------------|----------|--------------|--------------|-----------|----------|
| 1-butanol                    | 0.10751  | -233.645252  | -233.537742  |           |          |
| Int I                        | 0.222845 | -1441.227246 | -1441.004401 |           |          |
| TS1-H <sub>a</sub>           | 0.318263 | -1635.568792 | -1674.502717 | 24.720102 | -1384.55 |
| TS2                          | 0.099024 | -2807.807042 | -2807.708018 | 0.43      | -158.92  |
| Solvent: 2-methyl-1-propanol |          |              |              |           |          |
| 2-methyl-1-Propanol          | 0.10756  | -233.647572  | -233.540012  |           |          |
| Int I                        | 0.222848 | -1441.227801 | -1441.004953 |           |          |
| TS1-H <sub>a</sub>           | 0.347655 | -1674.850447 | -1674.502792 | 26.442471 | -1414.60 |
| TS2                          | 0.100245 | -2807.808915 | -2807.70867  | 1.649     | -111.62  |

**Table S7. Structure and Cartesian Coordinates of Optimized Geometries**

|                                                               |                                                                                      |             |             |             |  |
|---------------------------------------------------------------|--------------------------------------------------------------------------------------|-------------|-------------|-------------|--|
| Structure Ethanol<br>Solvent: Ethanol                         |     |             |             |             |  |
| cartesian coordinates<br>of stationary point<br>structure [Å] | C                                                                                    | -2.75902300 | 0.01808400  | 0.00395400  |  |
|                                                               | C                                                                                    | -1.24528500 | 0.01421100  | -0.00269600 |  |
|                                                               | H                                                                                    | -3.13670600 | 1.05033700  | 0.01082800  |  |
|                                                               | H                                                                                    | -3.15589600 | -0.49364900 | -0.88315300 |  |
|                                                               | H                                                                                    | -3.13685200 | -0.49253000 | 0.90103000  |  |
|                                                               | H                                                                                    | -0.87451500 | -1.02645500 | -0.02808400 |  |
|                                                               | H                                                                                    | -0.87453600 | 0.51226500  | -0.91680800 |  |
|                                                               | O                                                                                    | -0.79673900 | 0.68369400  | 1.15640200  |  |
|                                                               | H                                                                                    | 0.16699100  | 0.68184700  | 1.15266800  |  |
| Structure Int I<br>Solvent: Ethanol                           |  |             |             |             |  |
| cartesian coordinates<br>of stationary point<br>structure [Å] | C                                                                                    | -0.68165100 | -0.29219100 | 2.28978200  |  |
|                                                               | C                                                                                    | 0.72479400  | -0.79188000 | 1.84954500  |  |
|                                                               | C                                                                                    | -0.07255800 | 1.07168300  | 2.38994000  |  |
|                                                               | H                                                                                    | -1.49059500 | -0.41268800 | 1.55205600  |  |
|                                                               | H                                                                                    | -1.01788400 | -0.70591600 | 3.25173800  |  |
|                                                               | H                                                                                    | 1.15080800  | -1.60824600 | 2.44354600  |  |
|                                                               | C                                                                                    | 1.32726300  | 0.61678600  | 2.11550800  |  |
|                                                               | H                                                                                    | 1.99507900  | 0.65354800  | 2.98848800  |  |
|                                                               | H                                                                                    | 1.83709000  | 1.09697700  | 1.26536700  |  |
|                                                               | S                                                                                    | -0.80221500 | 2.61615800  | 2.04821900  |  |
|                                                               | O                                                                                    | 0.15673000  | 3.65196500  | 2.43145800  |  |
|                                                               | O                                                                                    | -2.14974200 | 2.60254900  | 2.61700600  |  |
|                                                               | C                                                                                    | -0.94799000 | 2.62332500  | 0.27626700  |  |
|                                                               | C                                                                                    | 0.11736200  | 3.10368400  | -0.48487800 |  |
|                                                               | C                                                                                    | -2.09424600 | 2.08307400  | -0.30634900 |  |
|                                                               | C                                                                                    | 0.03116100  | 3.02779700  | -1.87338400 |  |

|                                                               |                                                                                     |             |             |             |
|---------------------------------------------------------------|-------------------------------------------------------------------------------------|-------------|-------------|-------------|
|                                                               | H                                                                                   | 0.98857300  | 3.53637400  | 0.00918900  |
|                                                               | C                                                                                   | -2.16573700 | 2.01412900  | -1.69594000 |
|                                                               | H                                                                                   | -2.91338100 | 1.73407600  | 0.32420400  |
|                                                               | C                                                                                   | -1.10422500 | 2.48035100  | -2.47443300 |
|                                                               | H                                                                                   | 0.85075900  | 3.40049600  | -2.48869200 |
|                                                               | H                                                                                   | -3.05369700 | 1.59831900  | -2.17325200 |
|                                                               | H                                                                                   | -1.16492200 | 2.42154400  | -3.56199300 |
|                                                               | C                                                                                   | 0.75269300  | -1.17988500 | 0.39482000  |
|                                                               | C                                                                                   | 2.16817700  | -1.49205300 | -0.12468000 |
|                                                               | F                                                                                   | 0.24898700  | -0.17426500 | -0.37090100 |
|                                                               | F                                                                                   | -0.03740500 | -2.25502400 | 0.18174400  |
|                                                               | O                                                                                   | 3.15947600  | -1.30278300 | 0.52560500  |
|                                                               | O                                                                                   | 2.12455000  | -1.96585300 | -1.35006800 |
|                                                               | C                                                                                   | 3.38815900  | -2.28045500 | -1.96640800 |
|                                                               | C                                                                                   | 3.10807700  | -2.79305100 | -3.35663200 |
|                                                               | H                                                                                   | 3.89760000  | -3.02668300 | -1.34077000 |
|                                                               | H                                                                                   | 4.00241100  | -1.36912300 | -1.97292800 |
|                                                               | H                                                                                   | 4.05448600  | -3.04267000 | -3.85316700 |
|                                                               | H                                                                                   | 2.48494600  | -3.69622900 | -3.31844800 |
|                                                               | H                                                                                   | 2.59089700  | -2.03047700 | -3.95372000 |
| Structure Int I<br>Solvent: acetone                           | 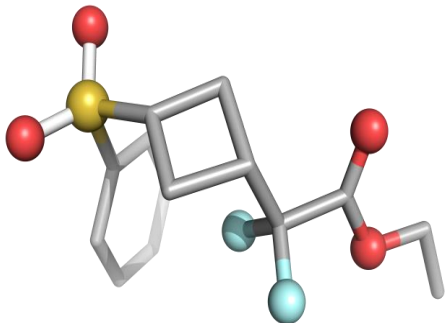 |             |             |             |
| cartesian coordinates<br>of stationary point<br>structure [Å] | C                                                                                   | -0.68166900 | -0.29233300 | 2.29050200  |
|                                                               | C                                                                                   | 0.72476200  | -0.79216000 | 1.85037800  |
|                                                               | C                                                                                   | -0.07251000 | 1.07154100  | 2.39013800  |
|                                                               | H                                                                                   | -1.49073200 | -0.41309600 | 1.55295100  |
|                                                               | H                                                                                   | -1.01763100 | -0.70575800 | 3.25267200  |
|                                                               | H                                                                                   | 1.15061800  | -1.60846900 | 2.44453400  |
|                                                               | C                                                                                   | 1.32734500  | 0.61647900  | 2.11621900  |
|                                                               | H                                                                                   | 1.99474300  | 0.65321500  | 2.98951800  |
|                                                               | H                                                                                   | 1.83753500  | 1.09648900  | 1.26618900  |
|                                                               | S                                                                                   | -0.80190100 | 2.61581200  | 2.04748000  |
|                                                               | O                                                                                   | 0.15677700  | 3.65198800  | 2.43080900  |
|                                                               | O                                                                                   | -2.14951200 | 2.60304000  | 2.61636100  |
|                                                               | C                                                                                   | -0.94763300 | 2.62283000  | 0.27560300  |
|                                                               | C                                                                                   | 0.11800600  | 3.10255500  | -0.48558400 |
|                                                               | C                                                                                   | -2.09416000 | 2.08299700  | -0.30694200 |
|                                                               | C                                                                                   | 0.03167900  | 3.02675000  | -1.87409700 |
|                                                               | H                                                                                   | 0.98966400  | 3.53456700  | 0.00827800  |
|                                                               | C                                                                                   | -2.16577000 | 2.01417700  | -1.69654300 |
|                                                               | H                                                                                   | -2.91341300 | 1.73409000  | 0.32350300  |
|                                                               | C                                                                                   | -1.10407200 | 2.47996000  | -2.47509200 |
|                                                               | H                                                                                   | 0.85149600  | 3.39892000  | -2.48942200 |
|                                                               | H                                                                                   | -3.05394100 | 1.59876100  | -2.17380000 |
|                                                               | H                                                                                   | -1.16485700 | 2.42124300  | -3.56264900 |

|                                                               |                                                                                    |             |             |             |
|---------------------------------------------------------------|------------------------------------------------------------------------------------|-------------|-------------|-------------|
|                                                               | C                                                                                  | 0.75273000  | -1.18017600 | 0.39569800  |
|                                                               | C                                                                                  | 2.16818400  | -1.49205600 | -0.12406200 |
|                                                               | F                                                                                  | 0.24872500  | -0.17461600 | -0.37003700 |
|                                                               | F                                                                                  | -0.03725300 | -2.25540200 | 0.18250100  |
|                                                               | O                                                                                  | 3.15956100  | -1.30302200 | 0.52620900  |
|                                                               | O                                                                                  | 2.12433000  | -1.96528400 | -1.34961000 |
|                                                               | C                                                                                  | 3.38784400  | -2.27962400 | -1.96650200 |
|                                                               | C                                                                                  | 3.10737300  | -2.79148000 | -3.35690200 |
|                                                               | H                                                                                  | 3.89734900  | -3.02624300 | -1.34140300 |
|                                                               | H                                                                                  | 4.00200500  | -1.36824700 | -1.97278700 |
|                                                               | H                                                                                  | 4.05370000  | -3.04076500 | -3.85374100 |
|                                                               | H                                                                                  | 2.48436000  | -3.69475900 | -3.31904700 |
|                                                               | H                                                                                  | 2.59009900  | -2.02856300 | -3.95348400 |
| Structure P1<br>Solvent: Ethanol                              | 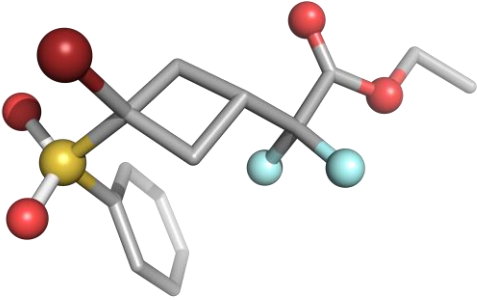 |             |             |             |
| cartesian coordinates<br>of stationary point<br>structure [Å] | C                                                                                  | -0.70958500 | -0.23619100 | 2.08558300  |
|                                                               | C                                                                                  | 0.69093700  | -0.68802900 | 1.61067700  |
|                                                               | C                                                                                  | -0.06314000 | 1.03920800  | 2.65146300  |
|                                                               | H                                                                                  | -1.38787500 | -0.02612200 | 1.24716100  |
|                                                               | H                                                                                  | -1.21994600 | -0.87087800 | 2.81661300  |
|                                                               | H                                                                                  | 1.12212100  | -1.48979900 | 2.22270600  |
|                                                               | C                                                                                  | 1.26046400  | 0.70836500  | 1.94190400  |
|                                                               | H                                                                                  | 2.15829500  | 0.74497600  | 2.56611200  |
|                                                               | H                                                                                  | 1.41786600  | 1.31891600  | 1.04253200  |
|                                                               | S                                                                                  | -0.86025500 | 2.62990700  | 2.22911600  |
|                                                               | O                                                                                  | 0.06640300  | 3.68530900  | 2.62819400  |
|                                                               | O                                                                                  | -2.21322100 | 2.58152900  | 2.77620700  |
|                                                               | C                                                                                  | -0.97165900 | 2.62230000  | 0.45556000  |
|                                                               | C                                                                                  | 0.08002500  | 3.15782900  | -0.28778700 |
|                                                               | C                                                                                  | -2.11546400 | 2.09731900  | -0.14546800 |
|                                                               | C                                                                                  | -0.00505800 | 3.12828600  | -1.67772500 |
|                                                               | H                                                                                  | 0.94014100  | 3.59733400  | 0.21963000  |
|                                                               | C                                                                                  | -2.18585100 | 2.07518900  | -1.53639800 |
|                                                               | H                                                                                  | -2.93519900 | 1.72495800  | 0.47077600  |
|                                                               | C                                                                                  | -1.13053600 | 2.58161900  | -2.29716400 |
|                                                               | H                                                                                  | 0.80665700  | 3.53923800  | -2.27857400 |
|                                                               | H                                                                                  | -3.06976700 | 1.66703300  | -2.02714600 |
|                                                               | H                                                                                  | -1.19055800 | 2.55982600  | -3.38607500 |
|                                                               | C                                                                                  | 0.75074500  | -1.09364600 | 0.16115500  |
|                                                               | C                                                                                  | 2.18284900  | -1.35805200 | -0.33391600 |
|                                                               | F                                                                                  | 0.24160100  | -0.10398200 | -0.62419700 |
|                                                               | F                                                                                  | -0.01891500 | -2.18122900 | -0.04652100 |
|                                                               | O                                                                                  | 3.14545300  | -0.88701500 | 0.20870000  |
|                                                               | O                                                                                  | 2.19133000  | -2.10657000 | -1.41327400 |
|                                                               | C                                                                                  | 3.47863500  | -2.37380600 | -2.00334000 |
|                                                               | C                                                                                  | 3.25816000  | -3.24305100 | -3.21563300 |
|                                                               | H                                                                                  | 4.10662900  | -2.86377800 | -1.24630200 |

|                                                               |                                                                                    |             |             |             |
|---------------------------------------------------------------|------------------------------------------------------------------------------------|-------------|-------------|-------------|
|                                                               | H                                                                                  | 3.94474000  | -1.41156100 | -2.25773000 |
|                                                               | H                                                                                  | 4.22350500  | -3.46442600 | -3.68855800 |
|                                                               | H                                                                                  | 2.78301400  | -4.19113000 | -2.93127200 |
|                                                               | H                                                                                  | 2.61951900  | -2.73200100 | -3.94804500 |
|                                                               | Br                                                                                 | 0.07655800  | 1.04062000  | 4.58760100  |
| Structure P1<br>Solvent: acetone                              | 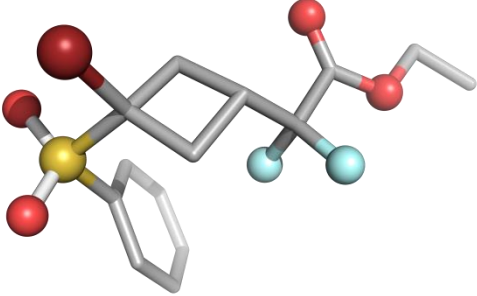 |             |             |             |
| cartesian coordinates<br>of stationary point<br>structure [Å] | C                                                                                  | -0.70955300 | -0.23628700 | 2.08706900  |
|                                                               | C                                                                                  | 0.69087800  | -0.68824700 | 1.61196700  |
|                                                               | C                                                                                  | -0.06311900 | 1.03960200  | 2.65185500  |
|                                                               | H                                                                                  | -1.38834800 | -0.02691100 | 1.24887500  |
|                                                               | H                                                                                  | -1.21938300 | -0.87064600 | 2.81874600  |
|                                                               | H                                                                                  | 1.12219100  | -1.48976300 | 2.22419900  |
|                                                               | C                                                                                  | 1.26047400  | 0.70829600  | 1.94247600  |
|                                                               | H                                                                                  | 2.15817300  | 0.74504200  | 2.56687000  |
|                                                               | H                                                                                  | 1.41813500  | 1.31845800  | 1.04288200  |
|                                                               | S                                                                                  | -0.86053700 | 2.62972300  | 2.22823100  |
|                                                               | O                                                                                  | 0.06521400  | 3.68593700  | 2.62775000  |
|                                                               | O                                                                                  | -2.21371900 | 2.58141700  | 2.77514300  |
|                                                               | C                                                                                  | -0.97120800 | 2.62172100  | 0.45481700  |
|                                                               | C                                                                                  | 0.08084400  | 3.15711900  | -0.28816000 |
|                                                               | C                                                                                  | -2.11465800 | 2.09628800  | -0.14653800 |
|                                                               | C                                                                                  | -0.00363800 | 3.12723000  | -1.67812500 |
|                                                               | H                                                                                  | 0.94087500  | 3.59667800  | 0.21934000  |
|                                                               | C                                                                                  | -2.18442500 | 2.07390200  | -1.53750200 |
|                                                               | H                                                                                  | -2.93458300 | 1.72363000  | 0.46926600  |
|                                                               | C                                                                                  | -1.12883800 | 2.58033900  | -2.29791600 |
|                                                               | H                                                                                  | 0.80836100  | 3.53800200  | -2.27870100 |
|                                                               | H                                                                                  | -3.06804900 | 1.66546700  | -2.02853100 |
|                                                               | H                                                                                  | -1.18837300 | 2.55831000  | -3.38684500 |
|                                                               | C                                                                                  | 0.75041100  | -1.09429700 | 0.16258700  |
|                                                               | C                                                                                  | 2.18242400  | -1.35808600 | -0.33310000 |
|                                                               | F                                                                                  | 0.24042200  | -0.10512900 | -0.62292700 |
|                                                               | F                                                                                  | -0.01880900 | -2.18232100 | -0.04457900 |
|                                                               | O                                                                                  | 3.14509800  | -0.88688600 | 0.20931300  |
|                                                               | O                                                                                  | 2.19062200  | -2.10619500 | -1.41265500 |
|                                                               | C                                                                                  | 3.47773900  | -2.37291800 | -2.00361100 |
|                                                               | C                                                                                  | 3.25661200  | -3.24059500 | -3.21688800 |
|                                                               | H                                                                                  | 4.10583700  | -2.86405000 | -1.24742400 |
|                                                               | H                                                                                  | 3.94379400  | -1.41041700 | -2.25704100 |
|                                                               | H                                                                                  | 4.22177800  | -3.46150800 | -3.69037600 |
|                                                               | H                                                                                  | 2.78147400  | -4.18898400 | -2.93353600 |
|                                                               | H                                                                                  | 2.61788600  | -2.72844900 | -3.94846900 |
|                                                               | Br                                                                                 | 0.07661600  | 1.04302400  | 4.58810300  |

|                                                               |                                                                                     |             |             |             |
|---------------------------------------------------------------|-------------------------------------------------------------------------------------|-------------|-------------|-------------|
| Structure TS2<br>Solvent: Ethanol                             | 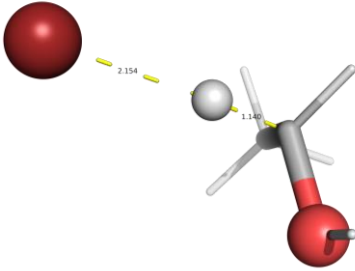  |             |             |             |
| cartesian coordinates<br>of stationary point<br>structure [Å] | O                                                                                   | -2.33403900 | -0.35429400 | -0.03946300 |
|                                                               | H                                                                                   | -2.73059600 | 0.49053000  | 0.20531000  |
|                                                               | C                                                                                   | -0.95085700 | -0.22540500 | -0.04821200 |
|                                                               | C                                                                                   | -0.31002700 | -1.58550200 | -0.18070500 |
|                                                               | H                                                                                   | -0.57234600 | 0.32027800  | 0.83390300  |
|                                                               | H                                                                                   | -0.62297400 | 0.41632400  | -0.93128900 |
|                                                               | H                                                                                   | 0.78247100  | -1.49369300 | -0.23732400 |
|                                                               | H                                                                                   | -0.57183600 | -2.20730000 | 0.68691400  |
|                                                               | H                                                                                   | -0.67015500 | -2.08567200 | -1.09053400 |
|                                                               | Br                                                                                  | 0.46454200  | 0.79603900  | -2.75136800 |
| Structure TS1-Br<br>Solvent: Ethanol                          |  |             |             |             |
| cartesian coordinates<br>of stationary point<br>structure [Å] | C                                                                                   | -0.79757400 | -0.16070200 | 0.16742100  |
|                                                               | C                                                                                   | 0.73828700  | -0.59994400 | 0.33250400  |
|                                                               | C                                                                                   | -0.05295500 | 0.99228800  | 0.57019400  |
|                                                               | H                                                                                   | -1.03549500 | -0.27684900 | -0.89793200 |
|                                                               | H                                                                                   | -1.56309100 | -0.51479100 | 0.86469200  |
|                                                               | H                                                                                   | 1.00355100  | -0.95578400 | 1.33976500  |
|                                                               | C                                                                                   | 1.27045500  | 0.87953400  | 0.03316000  |
|                                                               | H                                                                                   | 2.07091300  | 1.30506400  | 0.64605000  |
|                                                               | H                                                                                   | 1.40124600  | 0.95992600  | -1.05262800 |
|                                                               | S                                                                                   | -0.53150800 | 2.07954000  | 1.97502900  |
|                                                               | O                                                                                   | 0.64414300  | 2.77443700  | 2.45318800  |
|                                                               | O                                                                                   | -1.47917200 | 1.38050700  | 2.81790900  |
|                                                               | C                                                                                   | -1.41531100 | 3.15087600  | 0.87113000  |
|                                                               | C                                                                                   | -0.72031500 | 4.19592500  | 0.25495400  |
|                                                               | C                                                                                   | -2.77787800 | 2.92161800  | 0.65803700  |
|                                                               | C                                                                                   | -1.42081900 | 5.03343200  | -0.60784200 |
|                                                               | H                                                                                   | 0.33929100  | 4.35069500  | 0.46244800  |
|                                                               | C                                                                                   | -3.45986800 | 3.77163100  | -0.20664000 |
|                                                               | H                                                                                   | -3.28765700 | 2.10720000  | 1.17436900  |
|                                                               | C                                                                                   | -2.78204400 | 4.81883500  | -0.83711300 |
|                                                               | H                                                                                   | -0.90500100 | 5.85909900  | -1.09800000 |
|                                                               | H                                                                                   | -4.52458900 | 3.62129000  | -0.38520900 |
|                                                               | H                                                                                   | -3.32430000 | 5.48013200  | -1.51409300 |
|                                                               | C                                                                                   | 1.11883000  | -1.57184000 | -0.78432600 |
|                                                               | C                                                                                   | 2.63629900  | -1.85988400 | -0.75033900 |
|                                                               | F                                                                                   | 0.82576800  | -1.05374400 | -1.99544100 |

|                                                               |    |             |             |             |
|---------------------------------------------------------------|----|-------------|-------------|-------------|
|                                                               | F  | 0.40225000  | -2.68898800 | -0.64334600 |
|                                                               | O  | 3.42623100  | -0.99272700 | -0.50094200 |
|                                                               | O  | 2.89681000  | -3.10394000 | -1.05315400 |
|                                                               | C  | 4.29255800  | -3.47883600 | -1.09933600 |
|                                                               | C  | 4.36330200  | -4.93783200 | -1.47028000 |
|                                                               | H  | 4.72809400  | -3.27398900 | -0.11186300 |
|                                                               | H  | 4.79153600  | -2.83257000 | -1.83429500 |
|                                                               | H  | 5.41416100  | -5.25118800 | -1.51354400 |
|                                                               | H  | 3.84572000  | -5.55345400 | -0.72315700 |
|                                                               | H  | 3.90648000  | -5.11089800 | -2.45340100 |
|                                                               | Br | 1.43448800  | -0.28546900 | 3.54715800  |
| Structure TS1-Br<br>Solvent: acetone                          |    |             |             |             |
| cartesian coordinates<br>of stationary point<br>structure [Å] | C  | -0.79772300 | -0.16296700 | 0.18509000  |
|                                                               | C  | 0.73762000  | -0.60253700 | 0.34931400  |
|                                                               | C  | -0.05494200 | 0.99308500  | 0.58351600  |
|                                                               | H  | -1.03623700 | -0.28075000 | -0.88008700 |
|                                                               | H  | -1.56390000 | -0.51550400 | 0.88243700  |
|                                                               | H  | 1.00309200  | -0.95510500 | 1.35722800  |
|                                                               | C  | 1.26843200  | 0.87588400  | 0.04643300  |
|                                                               | H  | 2.06995700  | 1.30415800  | 0.65594100  |
|                                                               | H  | 1.39720300  | 0.95452800  | -1.03990200 |
|                                                               | S  | -0.53532400 | 2.08958400  | 1.97989400  |
|                                                               | O  | 0.64003100  | 2.78584100  | 2.45728400  |
|                                                               | O  | -1.48478100 | 1.39661900  | 2.82598200  |
|                                                               | C  | -1.41537200 | 3.15452200  | 0.86754100  |
|                                                               | C  | -0.71848600 | 4.19679200  | 0.24863500  |
|                                                               | C  | -2.77698800 | 2.92305700  | 0.65022700  |
|                                                               | C  | -1.41616800 | 5.02930000  | -0.62117900 |
|                                                               | H  | 0.34033200  | 4.35303000  | 0.45900300  |
|                                                               | C  | -3.45602900 | 3.76807100  | -0.22156200 |
|                                                               | H  | -3.28833500 | 2.11073300  | 1.16827900  |
|                                                               | C  | -2.77634800 | 4.81249200  | -0.85471300 |
|                                                               | H  | -0.89893300 | 5.85260500  | -1.11378500 |
|                                                               | H  | -4.51984400 | 3.61588200  | -0.40384300 |
|                                                               | H  | -3.31629800 | 5.46972700  | -1.53746300 |
|                                                               | C  | 1.11832400  | -1.57848600 | -0.76342700 |
|                                                               | C  | 2.63584300  | -1.86641100 | -0.72837000 |
|                                                               | F  | 0.82410500  | -1.06625800 | -1.97656900 |
|                                                               | F  | 0.40310000  | -2.69618000 | -0.61733500 |
|                                                               | O  | 3.42540800  | -1.00594900 | -0.45544100 |
|                                                               | O  | 2.89696600  | -3.10343500 | -1.05840100 |
|                                                               | C  | 4.29268100  | -3.47818000 | -1.10797600 |
|                                                               | C  | 4.36370300  | -4.92997500 | -1.50605300 |
|                                                               | H  | 4.72587800  | -3.29217000 | -0.11576300 |
|                                                               | H  | 4.79369800  | -2.81846900 | -1.82949200 |
|                                                               | H  | 5.41449500  | -5.24327000 | -1.55117900 |

|                                                               |                                                                                    |             |             |             |
|---------------------------------------------------------------|------------------------------------------------------------------------------------|-------------|-------------|-------------|
|                                                               | H                                                                                  | 3.84287700  | -5.55907700 | -0.77251900 |
|                                                               | H                                                                                  | 3.91053800  | -5.08419300 | -2.49398700 |
|                                                               | Br                                                                                 | 1.42426000  | -0.26839400 | 3.56736900  |
| Structure TS1-H <sub>b</sub><br>Solvent: Ethanol              | 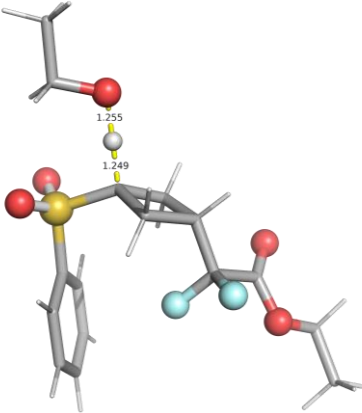 |             |             |             |
| cartesian coordinates<br>of stationary point<br>structure [Å] | C                                                                                  | -0.38268200 | -0.93818300 | 2.26957200  |
|                                                               | C                                                                                  | 1.01554500  | -1.21545500 | 1.66119500  |
|                                                               | C                                                                                  | 0.17075600  | 0.37167400  | 2.82254300  |
|                                                               | H                                                                                  | -1.17488300 | -0.80944900 | 1.51695900  |
|                                                               | H                                                                                  | -0.72227300 | -1.65097500 | 3.03038600  |
|                                                               | H                                                                                  | 1.55181000  | -2.04913000 | 2.12976400  |
|                                                               | C                                                                                  | 1.50946900  | 0.18055300  | 2.11222200  |
|                                                               | H                                                                                  | 2.38845200  | 0.18474200  | 2.76744400  |
|                                                               | H                                                                                  | 1.68272300  | 0.87877100  | 1.28010200  |
|                                                               | S                                                                                  | -0.75245500 | 1.88170800  | 2.64755200  |
|                                                               | O                                                                                  | 0.09190000  | 2.96198300  | 3.16350600  |
|                                                               | O                                                                                  | -2.07587400 | 1.64266900  | 3.22776900  |
|                                                               | C                                                                                  | -0.94946600 | 2.11374400  | 0.89763300  |
|                                                               | C                                                                                  | 0.03206300  | 2.81210300  | 0.19460900  |
|                                                               | C                                                                                  | -2.06775900 | 1.56702300  | 0.26895500  |
|                                                               | C                                                                                  | -0.10357900 | 2.94244300  | -1.18570100 |
|                                                               | H                                                                                  | 0.87617800  | 3.25248600  | 0.72753200  |
|                                                               | C                                                                                  | -2.18982400 | 1.70645600  | -1.11181100 |
|                                                               | H                                                                                  | -2.82919900 | 1.05457400  | 0.85882100  |
|                                                               | C                                                                                  | -1.20742300 | 2.38556700  | -1.83477500 |
|                                                               | H                                                                                  | 0.65139300  | 3.48496200  | -1.75553300 |
|                                                               | H                                                                                  | -3.05652500 | 1.28775100  | -1.62413300 |
|                                                               | H                                                                                  | -1.30728700 | 2.48950000  | -2.91604100 |
|                                                               | C                                                                                  | 0.99685700  | -1.43240600 | 0.17190700  |
|                                                               | C                                                                                  | 2.40399700  | -1.52352800 | -0.44482400 |
|                                                               | F                                                                                  | 0.35416900  | -0.40576600 | -0.44828900 |
|                                                               | F                                                                                  | 0.30373400  | -2.55234500 | -0.12747500 |
|                                                               | O                                                                                  | 3.39698000  | -1.20506600 | 0.15071000  |
|                                                               | O                                                                                  | 2.35135600  | -1.95841800 | -1.68419000 |
|                                                               | C                                                                                  | 3.60388700  | -2.05061100 | -2.38980500 |
|                                                               | C                                                                                  | 3.31376300  | -2.55805800 | -3.77987900 |
|                                                               | H                                                                                  | 4.26424600  | -2.72596700 | -1.82807900 |
|                                                               | H                                                                                  | 4.06729400  | -1.05406100 | -2.39692800 |
|                                                               | H                                                                                  | 4.25177500  | -2.63958100 | -4.34385300 |
|                                                               | H                                                                                  | 2.84289800  | -3.54912100 | -3.74016500 |
|                                                               | H                                                                                  | 2.64495900  | -1.86886900 | -4.31209000 |
|                                                               | O                                                                                  | 0.49387600  | 0.23011600  | 5.30203400  |
|                                                               | H                                                                                  | 0.34280100  | 0.30421100  | 4.05793200  |
|                                                               | C                                                                                  | -0.48367200 | 1.01638700  | 5.91955800  |



|                                                               |                                                                                    |             |             |             |
|---------------------------------------------------------------|------------------------------------------------------------------------------------|-------------|-------------|-------------|
|                                                               | C                                                                                  | -0.22127500 | 0.92739700  | 7.42084800  |
|                                                               | H                                                                                  | -1.49851000 | 0.64894100  | 5.69206900  |
|                                                               | H                                                                                  | -0.41397000 | 2.06743500  | 5.59086300  |
|                                                               | H                                                                                  | -0.96627300 | 1.53129900  | 7.95587700  |
|                                                               | H                                                                                  | -0.29641500 | -0.11348200 | 7.76193100  |
|                                                               | H                                                                                  | 0.78143500  | 1.30677600  | 7.65734800  |
| Structure TS1-H <sub>a</sub><br>Solvent: Ethanol              | 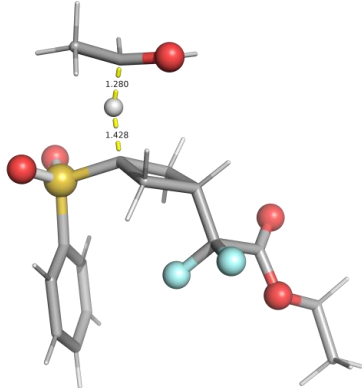 |             |             |             |
| cartesian coordinates<br>of stationary point<br>structure [Å] | C                                                                                  | -0.24618500 | -0.61492800 | 2.41209000  |
|                                                               | C                                                                                  | 1.13153300  | -0.97188400 | 1.79599000  |
|                                                               | C                                                                                  | 0.32921900  | 0.74417600  | 2.77097700  |
|                                                               | H                                                                                  | -1.07423700 | -0.59644300 | 1.68662500  |
|                                                               | H                                                                                  | -0.53115100 | -1.23146800 | 3.27550100  |
|                                                               | H                                                                                  | 1.66815800  | -1.77006300 | 2.32273900  |
|                                                               | C                                                                                  | 1.65858700  | 0.45452100  | 2.09487000  |
|                                                               | H                                                                                  | 2.53977600  | 0.50065800  | 2.74972700  |
|                                                               | H                                                                                  | 1.86087100  | 1.05467000  | 1.19392200  |
|                                                               | S                                                                                  | -0.55316200 | 2.23289800  | 2.53099600  |
|                                                               | O                                                                                  | 0.34666700  | 3.33574900  | 2.88264600  |
|                                                               | O                                                                                  | -1.83897800 | 2.09341500  | 3.22319500  |
|                                                               | C                                                                                  | -0.88008000 | 2.32654600  | 0.78458400  |
|                                                               | C                                                                                  | 0.06666500  | 2.92289800  | -0.04841000 |
|                                                               | C                                                                                  | -2.04305600 | 1.74173700  | 0.28348600  |
|                                                               | C                                                                                  | -0.15490500 | 2.91575200  | -1.42405400 |
|                                                               | H                                                                                  | 0.95142600  | 3.39297700  | 0.38362800  |
|                                                               | C                                                                                  | -2.25140400 | 1.74274300  | -1.09424800 |
|                                                               | H                                                                                  | -2.77220000 | 1.30802900  | 0.96945400  |
|                                                               | C                                                                                  | -1.30712300 | 2.32248800  | -1.94374200 |
|                                                               | H                                                                                  | 0.57140500  | 3.37926400  | -2.09263600 |
|                                                               | H                                                                                  | -3.15579900 | 1.29346600  | -1.50604800 |
|                                                               | H                                                                                  | -1.47456000 | 2.31863900  | -3.02167500 |
|                                                               | C                                                                                  | 1.06151600  | -1.31484300 | 0.33334500  |
|                                                               | C                                                                                  | 2.44467100  | -1.49744500 | -0.31697600 |
|                                                               | F                                                                                  | 0.41862100  | -0.33183100 | -0.35328600 |
|                                                               | F                                                                                  | 0.33835400  | -2.44268200 | 0.14992700  |
|                                                               | O                                                                                  | 3.47159100  | -1.22465200 | 0.24255100  |
|                                                               | O                                                                                  | 2.33293500  | -1.96258900 | -1.54224300 |
|                                                               | C                                                                                  | 3.55783000  | -2.15199300 | -2.27548500 |
|                                                               | C                                                                                  | 3.20077300  | -2.68611600 | -3.63983400 |
|                                                               | H                                                                                  | 4.19325400  | -2.84664300 | -1.70846900 |
|                                                               | H                                                                                  | 4.07865300  | -1.18555400 | -2.32859300 |
|                                                               | H                                                                                  | 4.11647300  | -2.84097200 | -4.22471600 |
|                                                               | H                                                                                  | 2.67440200  | -3.64590700 | -3.55454400 |
|                                                               | H                                                                                  | 2.55858800  | -1.97636000 | -4.17778300 |
|                                                               | C                                                                                  | -0.61755400 | 0.40219900  | 6.02337300  |
|                                                               | H                                                                                  | -1.33762000 | -0.22137800 | 5.47353000  |

|                                                               |                                                                                      |             |             |             |
|---------------------------------------------------------------|--------------------------------------------------------------------------------------|-------------|-------------|-------------|
|                                                               | H                                                                                    | -0.98845000 | 1.43509000  | 6.02409000  |
|                                                               | C                                                                                    | 0.73449200  | 0.33813100  | 5.37253200  |
|                                                               | H                                                                                    | 0.53896600  | 0.77010100  | 4.18325000  |
|                                                               | H                                                                                    | 1.48210200  | 1.03061900  | 5.78918600  |
|                                                               | H                                                                                    | -0.56627800 | 0.03746500  | 7.06116900  |
|                                                               | O                                                                                    | 1.18712700  | -0.96009800 | 5.23964100  |
|                                                               | H                                                                                    | 2.14251400  | -0.95932700 | 5.10164200  |
| Structure 1-propanol<br>Solvent:1-propanol                    | 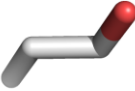   |             |             |             |
| cartesian coordinates<br>of stationary point<br>structure [Å] | C                                                                                    | -3.50516200 | 1.37845200  | 0.01071100  |
|                                                               | H                                                                                    | -3.16919100 | 0.33124900  | -0.02609600 |
|                                                               | H                                                                                    | -3.16830600 | 1.86990200  | -0.91443300 |
|                                                               | H                                                                                    | -4.60342500 | 1.37808300  | 0.00894900  |
|                                                               | C                                                                                    | -2.95429100 | 2.08832800  | 1.24061600  |
|                                                               | H                                                                                    | -3.31183500 | 3.12964600  | 1.27776800  |
|                                                               | H                                                                                    | -3.31181700 | 1.59986300  | 2.16100300  |
|                                                               | C                                                                                    | -1.43839900 | 2.10519300  | 1.27017600  |
|                                                               | H                                                                                    | -1.06002200 | 2.60550100  | 0.35845400  |
|                                                               | H                                                                                    | -1.06019300 | 1.06540400  | 1.24800100  |
|                                                               | O                                                                                    | -1.01807800 | 2.77816000  | 2.43548300  |
|                                                               | H                                                                                    | -0.05479400 | 2.78736200  | 2.45131800  |
| Structure TS1-Ha<br>Solvent:1-propanol                        |  |             |             |             |
| cartesian coordinates<br>of stationary point<br>structure [Å] | C                                                                                    | -0.25366500 | -0.62366900 | 2.40854800  |
|                                                               | C                                                                                    | 1.12326500  | -0.98217500 | 1.79167900  |
|                                                               | C                                                                                    | 0.32428400  | 0.73380300  | 2.76974900  |
|                                                               | H                                                                                    | -1.08133800 | -0.60194900 | 1.68274700  |
|                                                               | H                                                                                    | -0.54069200 | -1.24060600 | 3.27098600  |
|                                                               | H                                                                                    | 1.65924900  | -1.78086800 | 2.31830100  |
|                                                               | C                                                                                    | 1.65229700  | 0.44339800  | 2.09080700  |
|                                                               | H                                                                                    | 2.53448300  | 0.48782000  | 2.74451900  |
|                                                               | H                                                                                    | 1.85367800  | 1.04387600  | 1.18991400  |
|                                                               | S                                                                                    | -0.55677100 | 2.22417500  | 2.53427000  |

|   |             |             |             |
|---|-------------|-------------|-------------|
| O | 0.34188800  | 3.32470000  | 2.89594100  |
| O | -1.84590800 | 2.08136800  | 3.21939200  |
| C | -0.87554500 | 2.32715200  | 0.78682300  |
| C | 0.07491200  | 2.92811800  | -0.03857200 |
| C | -2.03627400 | 1.74525700  | 0.27726200  |
| C | -0.14038500 | 2.92853100  | -1.41523900 |
| H | 0.95757000  | 3.39593700  | 0.40018000  |
| C | -2.23836700 | 1.75382500  | -1.10137000 |
| H | -2.76852800 | 1.30798300  | 0.95763300  |
| C | -1.29023100 | 2.33814100  | -1.94337600 |
| H | 0.58889700  | 3.39576700  | -2.07796900 |
| H | -3.14089300 | 1.30686200  | -1.51973700 |
| H | -1.45280300 | 2.34021300  | -3.02206100 |
| C | 1.05254200  | -1.32449000 | 0.32892400  |
| C | 2.43543000  | -1.50805400 | -0.32170700 |
| F | 0.41032300  | -0.34063100 | -0.35701500 |
| F | 0.32857500  | -2.45175800 | 0.14509200  |
| O | 3.46296700  | -1.24047900 | 0.23918500  |
| O | 2.32283300  | -1.96795300 | -1.54893000 |
| C | 3.54742300  | -2.15757200 | -2.28244700 |
| C | 3.18941100  | -2.68401900 | -3.64954200 |
| H | 4.18054400  | -2.85682800 | -1.71849500 |
| H | 4.07129900  | -1.19251100 | -2.33063200 |
| H | 4.10487300  | -2.83884600 | -4.23481600 |
| H | 2.66002500  | -3.64256700 | -3.56913000 |
| H | 2.54957700  | -1.96974700 | -4.18429900 |
| C | -0.59752400 | 0.40947600  | 6.04113400  |
| H | -1.31551600 | -0.19198100 | 5.45949600  |
| H | -0.94773600 | 1.45084000  | 5.98406000  |
| C | 0.74685000  | 0.33135900  | 5.36684000  |
| H | 0.53936300  | 0.75913100  | 4.17525300  |
| H | 1.50526000  | 1.01849100  | 5.77597300  |
| O | 1.18736600  | -0.97129700 | 5.23552700  |
| H | 2.14487200  | -0.98383900 | 5.11510100  |
| C | -0.55348600 | -0.07752500 | 7.48858600  |
| H | -1.55053400 | -0.04036300 | 7.94817600  |
| H | -0.19096200 | -1.11367600 | 7.53001300  |
| H | 0.12424200  | 0.54492200  | 8.09108200  |

|                                                               |                                                                                      |             |             |             |
|---------------------------------------------------------------|--------------------------------------------------------------------------------------|-------------|-------------|-------------|
| Structure TS2<br>Solvent:1-propanol                           | 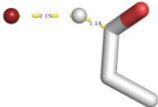    |             |             |             |
| cartesian coordinates<br>of stationary point<br>structure [Å] | O                                                                                    | -2.36533400 | -0.39065600 | -0.13050700 |
|                                                               | H                                                                                    | -2.79943100 | 0.43264200  | 0.12290200  |
|                                                               | C                                                                                    | -0.98791200 | -0.22339000 | -0.07181000 |
|                                                               | C                                                                                    | -0.29722000 | -1.56875700 | -0.14061700 |
|                                                               | H                                                                                    | -0.67093800 | 0.34681300  | 0.82057300  |
|                                                               | H                                                                                    | -0.63127300 | 0.40756100  | -0.95126800 |
|                                                               | H                                                                                    | 0.78830900  | -1.39502100 | -0.19359600 |
|                                                               | H                                                                                    | -0.58861000 | -2.05675700 | -1.08450600 |
|                                                               | Br                                                                                   | 0.51217000  | 0.80508800  | -2.72698200 |
|                                                               | C                                                                                    | -0.64781200 | -2.45886300 | 1.04661400  |
|                                                               | H                                                                                    | -1.73248400 | -2.62466400 | 1.09290500  |
|                                                               | H                                                                                    | -0.15128200 | -3.43543200 | 0.96861600  |
|                                                               | H                                                                                    | -0.33453900 | -1.99236300 | 1.99265800  |
| Structure 1-butanol<br>Solvent:1-butanol                      |  |             |             |             |
| cartesian coordinates<br>of stationary point<br>structure [Å] | C                                                                                    | -3.50516200 | 1.37845200  | 0.01071100  |
|                                                               | H                                                                                    | -3.16919100 | 0.33124900  | -0.02609600 |
|                                                               | H                                                                                    | -3.16830600 | 1.86990200  | -0.91443300 |
|                                                               | H                                                                                    | -4.60342500 | 1.37808300  | 0.00894900  |
|                                                               | C                                                                                    | -2.95429100 | 2.08832800  | 1.24061600  |
|                                                               | H                                                                                    | -3.31183500 | 3.12964600  | 1.27776800  |
|                                                               | H                                                                                    | -3.31181700 | 1.59986300  | 2.16100300  |
|                                                               | C                                                                                    | -1.43839900 | 2.10519300  | 1.27017600  |
|                                                               | H                                                                                    | -1.06002200 | 2.60550100  | 0.35845400  |
|                                                               | H                                                                                    | -1.06019300 | 1.06540400  | 1.24800100  |
|                                                               | O                                                                                    | -1.01807800 | 2.77816000  | 2.43548300  |
|                                                               | H                                                                                    | -0.05479400 | 2.78736200  | 2.45131800  |

|                                                               |                                                                                                                                                         |                                                                                                                                                                                                                                                                                                                                                                                                                                                             |                                                                                                                                                                                                                                                                                                                                                                                                                                                             |                                                                                                                                                                                                                                                                                                                                                                                                                                                            |
|---------------------------------------------------------------|---------------------------------------------------------------------------------------------------------------------------------------------------------|-------------------------------------------------------------------------------------------------------------------------------------------------------------------------------------------------------------------------------------------------------------------------------------------------------------------------------------------------------------------------------------------------------------------------------------------------------------|-------------------------------------------------------------------------------------------------------------------------------------------------------------------------------------------------------------------------------------------------------------------------------------------------------------------------------------------------------------------------------------------------------------------------------------------------------------|------------------------------------------------------------------------------------------------------------------------------------------------------------------------------------------------------------------------------------------------------------------------------------------------------------------------------------------------------------------------------------------------------------------------------------------------------------|
| Structure TS1-Ha<br>Solvent:1-butanol                         | 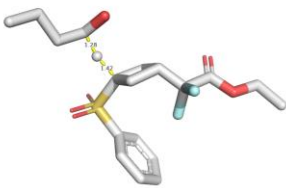                                                                      |                                                                                                                                                                                                                                                                                                                                                                                                                                                             |                                                                                                                                                                                                                                                                                                                                                                                                                                                             |                                                                                                                                                                                                                                                                                                                                                                                                                                                            |
| cartesian coordinates<br>of stationary point<br>structure [Å] | C<br>C<br>C<br>H<br>H<br>H<br>C<br>H<br>H<br>S<br>O<br>O<br>C<br>C<br>C<br>C<br>H<br>C<br>H<br>C<br>H<br>H<br>H<br>C<br>C<br>F<br>F<br>O<br>O<br>C<br>C | -0.24330700<br>1.12527500<br>0.35079800<br>-1.07636000<br>-0.52954800<br>1.65739800<br>1.67102000<br>2.55815700<br>1.87251500<br>-0.51602200<br>0.39744200<br>-1.80156100<br>-0.84643800<br>0.10388600<br>-2.01665800<br>-0.12152300<br>0.99425600<br>-2.22879100<br>-2.74819900<br>-1.28103300<br>0.60745700<br>-3.13881800<br>-1.45144700<br>1.03998700<br>2.41614600<br>0.40085400<br>0.30527900<br>3.45080900<br>2.28943400<br>3.50660300<br>3.13272100 | -0.58285900<br>-0.96252400<br>0.77304800<br>-0.56225400<br>-1.18586400<br>-1.76073000<br>0.46101700<br>0.50432200<br>1.04880500<br>2.27000300<br>3.36447800<br>2.14895400<br>2.35594500<br>2.93749200<br>1.77989000<br>2.92377000<br>3.40164700<br>1.77415300<br>1.35819000<br>2.33877600<br>3.37585400<br>1.33144300<br>2.32968200<br>-1.32037400<br>-1.52391500<br>-0.33874800<br>-2.44357800<br>-1.26804600<br>-1.98745100<br>-2.19762000<br>-2.72408100 | 2.43118400<br>1.80829800<br>2.77094500<br>1.71152900<br>3.30370600<br>2.33953000<br>2.08670900<br>2.73385200<br>1.17748000<br>2.52493700<br>2.86695900<br>3.22074100<br>0.77867500<br>-0.06064600<br>0.28445800<br>-1.43562900<br>0.36627900<br>-1.09266100<br>0.97534800<br>-1.94839000<br>-2.10912400<br>-1.49913000<br>-3.02582900<br>0.35004000<br>-0.30889800<br>-0.34167300<br>0.18425300<br>0.24426200<br>-1.53342800<br>-2.27347800<br>-3.63633400 |

|                                                               |                                                                                     |             |             |             |
|---------------------------------------------------------------|-------------------------------------------------------------------------------------|-------------|-------------|-------------|
|                                                               | H                                                                                   | 4.13297300  | -2.90379100 | -1.71057200 |
|                                                               | H                                                                                   | 4.04424900  | -1.24052800 | -2.32860000 |
|                                                               | H                                                                                   | 4.04221700  | -2.89448700 | -4.22657100 |
|                                                               | H                                                                                   | 2.58989800  | -3.67447000 | -3.54896500 |
|                                                               | H                                                                                   | 2.50003400  | -2.00267000 | -4.17000400 |
|                                                               | C                                                                                   | -0.54683800 | 0.50458700  | 6.05545000  |
|                                                               | H                                                                                   | -1.27923400 | -0.10607100 | 5.49936600  |
|                                                               | H                                                                                   | -0.89304000 | 1.54752900  | 5.98057600  |
|                                                               | C                                                                                   | 0.78884700  | 0.39870800  | 5.37041800  |
|                                                               | H                                                                                   | 0.57655400  | 0.81275900  | 4.17595200  |
|                                                               | H                                                                                   | 1.56008800  | 1.08120400  | 5.76266200  |
|                                                               | O                                                                                   | 1.21112800  | -0.91161700 | 5.25285300  |
|                                                               | H                                                                                   | 2.16723100  | -0.93824600 | 5.12408800  |
|                                                               | C                                                                                   | -0.50478000 | 0.05532400  | 7.51737500  |
|                                                               | H                                                                                   | -0.11749900 | -0.97446800 | 7.55464900  |
|                                                               | H                                                                                   | 0.21932800  | 0.68151200  | 8.06398400  |
|                                                               | C                                                                                   | -1.87033500 | 0.13061700  | 8.18926400  |
|                                                               | H                                                                                   | -1.82052000 | -0.19348700 | 9.23809000  |
|                                                               | H                                                                                   | -2.26161800 | 1.15886800  | 8.17132900  |
|                                                               | H                                                                                   | -2.59830200 | -0.51160200 | 7.67130300  |
| Structure TS2<br>Solvent:1-butanol                            | 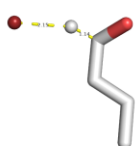 |             |             |             |
| cartesian coordinates<br>of stationary point<br>structure [Å] | O                                                                                   | -2.37030700 | -0.49963200 | -0.20293200 |
|                                                               | H                                                                                   | -2.88352000 | 0.29291300  | -0.00562300 |
|                                                               | C                                                                                   | -1.01582200 | -0.21410600 | -0.08434900 |
|                                                               | C                                                                                   | -0.21335100 | -1.49675500 | -0.07225700 |
|                                                               | H                                                                                   | -0.79315600 | 0.40836600  | 0.80149100  |
|                                                               | H                                                                                   | -0.66905900 | 0.41672900  | -0.96689800 |
|                                                               | H                                                                                   | 0.85785200  | -1.23864500 | -0.08774300 |
|                                                               | H                                                                                   | -0.42230300 | -2.04679300 | -1.00535600 |
|                                                               | Br                                                                                  | 0.49303600  | 0.85240100  | -2.72799000 |
|                                                               | C                                                                                   | -0.52937800 | -2.37995400 | 1.13215600  |
|                                                               | H                                                                                   | -1.60985800 | -2.58855900 | 1.13986000  |
|                                                               | H                                                                                   | -0.31366200 | -1.81824300 | 2.05637000  |

|                                                              |                                                                                      |             |             |             |
|--------------------------------------------------------------|--------------------------------------------------------------------------------------|-------------|-------------|-------------|
|                                                              | C                                                                                    | 0.25876600  | -3.68416400 | 1.12113500  |
|                                                              | H                                                                                    | 1.34202300  | -3.49081700 | 1.13296700  |
|                                                              | H                                                                                    | 0.01792500  | -4.30711100 | 1.99371600  |
|                                                              | H                                                                                    | 0.03526200  | -4.26952900 | 0.21660000  |
| Structure 2-methyl-1-propanol<br>Solvent:2-methyl-1-propanol | 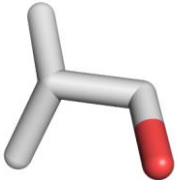   |             |             |             |
| cartesian coordinates of stationary point structure [Å]      | C                                                                                    | -3.45930900 | -0.04623800 | 0.00651800  |
|                                                              | H                                                                                    | -3.07334700 | -1.07382900 | -0.01074400 |
|                                                              | H                                                                                    | -3.12839100 | 0.45944200  | -0.91547000 |
|                                                              | H                                                                                    | -4.55835300 | -0.08345600 | -0.00391700 |
|                                                              | C                                                                                    | -2.94646400 | 0.70330400  | 1.23315500  |
|                                                              | H                                                                                    | -3.30726200 | 0.18203300  | 2.13702500  |
|                                                              | C                                                                                    | -3.45191500 | 2.14270400  | 1.26340600  |
|                                                              | H                                                                                    | -3.09164500 | 2.69781200  | 0.38243100  |
|                                                              | H                                                                                    | -4.55075400 | 2.17251000  | 1.25060200  |
|                                                              | H                                                                                    | -3.10763600 | 2.67396700  | 2.16303000  |
|                                                              | C                                                                                    | -1.42603700 | 0.67833000  | 1.29159300  |
|                                                              | H                                                                                    | -1.08559900 | 1.25049000  | 2.17492100  |
|                                                              | H                                                                                    | -1.02627300 | 1.19136200  | 0.39448300  |
|                                                              | O                                                                                    | -0.98715800 | -0.65966400 | 1.35275900  |
|                                                              | H                                                                                    | -0.02409800 | -0.66670500 | 1.32934900  |
| Structure TS1-Ha<br>Solvent:<br>2-methyl-1-propanol          |  |             |             |             |
| cartesian coordinates of stationary point structure [Å]      | C                                                                                    | -0.27693900 | -0.65426600 | 2.38933200  |
|                                                              | C                                                                                    | 1.11305200  | -0.96132000 | 1.77462100  |
|                                                              | C                                                                                    | 0.25101100  | 0.72268300  | 2.75488900  |
|                                                              | H                                                                                    | -1.09957000 | -0.65405900 | 1.65730600  |
|                                                              | H                                                                                    | -0.54993100 | -1.28289700 | 3.24730200  |

|   |             |             |             |
|---|-------------|-------------|-------------|
| H | 1.68328700  | -1.72669900 | 2.31482100  |
| C | 1.57963300  | 0.49020000  | 2.05135700  |
| H | 2.47398300  | 0.58705800  | 2.68153400  |
| H | 1.72703300  | 1.08794500  | 1.13844600  |
| S | -0.71406900 | 2.16155200  | 2.50646100  |
| O | 0.09269600  | 3.31672900  | 2.91717700  |
| O | -2.01960000 | 1.92575200  | 3.13273500  |
| C | -0.96613900 | 2.27097300  | 0.74817400  |
| C | -0.01937300 | 2.93712500  | -0.03032600 |
| C | -2.07227700 | 1.63529500  | 0.18456100  |
| C | -0.17981400 | 2.94716700  | -1.41438900 |
| H | 0.81795100  | 3.44635100  | 0.44922600  |
| C | -2.22041400 | 1.65506900  | -1.20080400 |
| H | -2.80560700 | 1.14813100  | 0.82885300  |
| C | -1.27366100 | 2.30310900  | -1.99617000 |
| H | 0.54808900  | 3.46426500  | -2.04058900 |
| H | -3.08001100 | 1.16642000  | -1.66082600 |
| H | -1.39363300 | 2.31331400  | -3.08037700 |
| C | 1.06026400  | -1.33461400 | 0.31855000  |
| C | 2.45145800  | -1.47202000 | -0.32563800 |
| F | 0.37986900  | -0.39221900 | -0.38826700 |
| F | 0.38439900  | -2.49447800 | 0.15640300  |
| O | 3.46410600  | -1.14134600 | 0.22868500  |
| O | 2.36326400  | -1.97001300 | -1.53991100 |
| C | 3.59709100  | -2.12293500 | -2.26634800 |
| C | 3.26704700  | -2.70084600 | -3.61964200 |
| H | 4.25964700  | -2.77772900 | -1.68314100 |
| H | 4.07701900  | -1.13679800 | -2.33906300 |
| H | 4.19026100  | -2.83030200 | -4.19888300 |
| H | 2.78035700  | -3.67944100 | -3.51475600 |
| H | 2.59774000  | -2.03018000 | -4.17439700 |
| C | -0.59087500 | 0.56507300  | 6.07882500  |
| H | -1.40637900 | 0.19477300  | 5.43178600  |
| C | 0.71204100  | 0.29893400  | 5.35607600  |
| H | 0.50477200  | 0.74208700  | 4.16578100  |
| H | 1.56268800  | 0.89181500  | 5.73319200  |
| O | 0.98996300  | -1.04553600 | 5.21991600  |
| H | 1.93857700  | -1.17524900 | 5.09883000  |



|                                                               |                                                                                   |             |             |             |
|---------------------------------------------------------------|-----------------------------------------------------------------------------------|-------------|-------------|-------------|
|                                                               | C                                                                                 | -0.64186700 | -0.18609000 | 7.41047400  |
|                                                               | H                                                                                 | -1.60266000 | -0.00833100 | 7.91476500  |
|                                                               | H                                                                                 | -0.51876100 | -1.26592700 | 7.25738700  |
|                                                               | H                                                                                 | 0.16304200  | 0.16160700  | 8.07732400  |
|                                                               | C                                                                                 | -0.77130000 | 2.06851900  | 6.27437900  |
|                                                               | H                                                                                 | -0.70215600 | 2.61396700  | 5.32334000  |
|                                                               | H                                                                                 | -1.75394200 | 2.28373000  | 6.71701700  |
|                                                               | H                                                                                 | 0.00058000  | 2.45969500  | 6.95598200  |
| Structure TS2<br>Solvent:2-methyl-1-propanol                  | 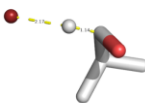 |             |             |             |
| cartesian coordinates<br>of stationary point<br>structure [Å] | O                                                                                 | -2.41393700 | -0.39536500 | -0.07817300 |
|                                                               | H                                                                                 | -2.82351200 | 0.43215700  | 0.20028500  |
|                                                               | C                                                                                 | -1.03253300 | -0.24374600 | -0.09737600 |
|                                                               | C                                                                                 | -0.35239000 | -1.59939800 | -0.20737900 |
|                                                               | H                                                                                 | -0.65929200 | 0.31893500  | 0.77671600  |
|                                                               | H                                                                                 | -0.72240100 | 0.37751500  | -0.99953700 |
|                                                               | H                                                                                 | 0.72809100  | -1.39258300 | -0.28828700 |
|                                                               | Br                                                                                | 0.64154700  | 1.06860700  | -2.54484500 |
|                                                               | C                                                                                 | -0.60625300 | -2.42567200 | 1.05377000  |
|                                                               | H                                                                                 | -1.68405400 | -2.60571200 | 1.17627900  |
|                                                               | H                                                                                 | -0.09857400 | -3.39851600 | 0.98923200  |
|                                                               | H                                                                                 | -0.24083300 | -1.90681300 | 1.95207000  |
|                                                               | C                                                                                 | -0.80692900 | -2.34089900 | -1.46280800 |
|                                                               | H                                                                                 | -0.60074900 | -1.74953000 | -2.36791500 |
|                                                               | H                                                                                 | -0.28573800 | -3.30400100 | -1.55651100 |
|                                                               | H                                                                                 | -1.88807700 | -2.53578800 | -1.41869500 |

## 5 Product characterization

### ethyl 2-(3-bromo-3-(phenylsulfonyl)cyclobutyl)-2,2-difluoroacetate (**3a**)

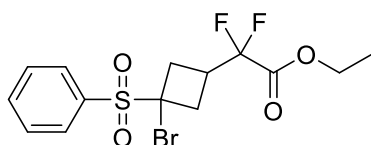

Prepared according to General Procedure A, compound **3a** was obtained as colorless oil (49

mg, 62 % yield,  $dr = 3.5:1$ ). Mixture of isomer 1 and isomer 2:  $^1\text{H NMR}$  (300 MHz,  $\text{CDCl}_3$ )  $\delta$  8.07 – 7.93 (m, 2H), 7.77 – 7.68 (m, 1H), 7.65 – 7.56 (m, 2H), 4.40 – 4.28 (m, 2H), 3.55 – 3.26 (m, 3H), 3.05 – 2.42 (m, 2H), 1.40 – 1.32 (m, 3H). Isomer 1:  $^{13}\text{C NMR}$  (75 MHz,  $\text{CDCl}_3$ )  $\delta$  163.1 (t,  $^2J_{\text{C-F}} = 33.0$  Hz), 135.0, 133.6, 131.3, 129.1, 114.1 (t,  $^1J_{\text{C-F}} = 250.5$  Hz), 65.4, 63.4, 35.7 (t,  $^3J_{\text{C-F}} = 5.3$  Hz), 34.3 (t,  $^2J_{\text{C-F}} = 26.3$  Hz), 14.1.  $^{19}\text{F NMR}$  (282 MHz,  $\text{CDCl}_3$ )  $\delta$  -114.52. **HRMS** (ESI) for  $\text{C}_{14}\text{H}_{15}\text{BrF}_2\text{NaO}_4\text{S}$   $[\text{M} + \text{Na}]^+$ , calcd: 418.9735, found: 418.9733. Isomer 2:  $^{13}\text{C NMR}$  (75 MHz,  $\text{CDCl}_3$ )  $\delta$  163.1 (t,  $^2J_{\text{C-F}} = 33.0$  Hz), 134.8, 134.0, 130.7, 129.2, 114.1 (t,  $^1J_{\text{C-F}} = 250.5$  Hz), 67.7, 63.5, 34.7 (t,  $^3J_{\text{C-F}} = 5.3$  Hz), 31.9 (t,  $^2J_{\text{C-F}} = 26.3$  Hz), 14.1.  $^{19}\text{F NMR}$  (282 MHz,  $\text{CDCl}_3$ )  $\delta$  -113.40. **HRMS** (ESI) for  $\text{C}_{14}\text{H}_{15}\text{BrF}_2\text{NaO}_4\text{S}$   $[\text{M} + \text{Na}]^+$ , calcd: 418.9735, found: 418.9733.

**ethyl 2-(3-bromo-3-tosylcyclobutyl)-2,2-difluoroacetate (3b)**

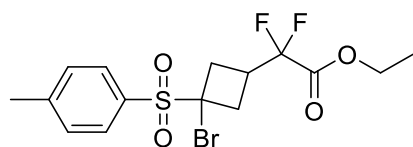

Prepared according to General Procedure A, compound **3b** was obtained as colorless oil (53 mg, 65 % yield,  $dr = 3.5:1$ ). Mixture of isomer 1 and isomer 2:  $^1\text{H NMR}$  (300 MHz,  $\text{CDCl}_3$ )  $\delta$  7.93 – 7.81 (m, 2H), 7.42 – 7.35 (m, 2H), 4.39 – 4.28 (m, 2H), 3.53 – 3.26 (m, 3H), 3.04 – 2.40 (m, 5H), 1.39 – 1.32 (m, 3H). Isomer 1:  $^{13}\text{C NMR}$  (101 MHz,  $\text{CDCl}_3$ )  $\delta$  163.1 (t,  $^2J_{\text{C-F}} = 33.3$  Hz), 146.3, 130.9, 130.5, 129.8, 113.8 (t,  $^1J_{\text{C-F}} = 252.5$  Hz), 65.6, 63.4, 35.7 (t,  $^3J_{\text{C-F}} = 5.1$  Hz), 34.3 (t,  $^2J_{\text{C-F}} = 26.3$  Hz), 21.9, 14.0.  $^{19}\text{F NMR}$  (282 MHz,  $\text{CDCl}_3$ )  $\delta$  -114.53. **HRMS** (ESI) for  $\text{C}_{15}\text{H}_{17}\text{BrF}_2\text{NaO}_4\text{S}$   $[\text{M} + \text{Na}]^+$ , calcd: 432.9891, found: 432.9888. Isomer 2:  $^{13}\text{C NMR}$  (101 MHz,  $\text{CDCl}_3$ )  $\delta$  163.1 (t,  $^2J_{\text{C-F}} = 33.3$  Hz), 146.1, 131.2, 130.6, 129.9, 114.2 (t,  $^1J_{\text{C-F}} = 252.5$  Hz), 67.9, 63.4, 34.7 (t,  $^3J_{\text{C-F}} = 5.1$  Hz), 31.8 (t,  $^2J_{\text{C-F}} = 26.3$  Hz), 21.9, 14.0.  $^{19}\text{F NMR}$  (282 MHz,  $\text{CDCl}_3$ )  $\delta$  -113.38. **HRMS** (ESI) for  $\text{C}_{15}\text{H}_{17}\text{BrF}_2\text{NaO}_4\text{S}$   $[\text{M} + \text{Na}]^+$ , calcd: 432.9891, found: 432.9888.

**ethyl 2-(3-bromo-3-((4-methoxyphenyl)sulfonyl)cyclobutyl)-2,2-difluoroacetate (3c)**

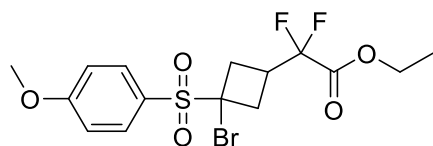

Prepared according to General Procedure A, compound **3c** was obtained as colorless oil (60 mg, 70 % yield,  $dr = 3.3:1$ ). Mixture of isomer 1 and isomer 2:  $^1\text{H NMR}$  (300 MHz,  $\text{CDCl}_3$ )  $\delta$  7.98 – 7.83 (m, 2H), 7.08 – 6.99 (m, 2H), 4.33 (q,  $J = 7.1$  Hz, 2H), 3.90 (d,  $J = 1.8$  Hz, 3H), 3.51 – 3.26

(m, 3H), 3.05 – 2.38 (m, 2H), 1.35 (t,  $J = 7.2$  Hz, 3H). Isomer 1:  $^{13}\text{C}$  NMR (101 MHz,  $\text{CDCl}_3$ )  $\delta$  164.8, 163.2 (t,  $^2J_{\text{C-F}} = 33.3$  Hz), 133.5, 124.7, 114.4, 113.9 (t,  $^1J_{\text{C-F}} = 252.5$  Hz), 65.9, 63.4, 55.9, 35.7 (t,  $^3J_{\text{C-F}} = 5.1$  Hz), 34.3 (t,  $^2J_{\text{C-F}} = 26.3$  Hz), 14.1.  $^{19}\text{F}$  NMR (282 MHz,  $\text{CDCl}_3$ )  $\delta$  -114.51. HRMS (ESI) for  $\text{C}_{15}\text{H}_{17}\text{BrF}_2\text{NaO}_5\text{S}$  [ $\text{M} + \text{Na}$ ] $^+$ , calcd: 448.9840, found: 448.9833. Isomer 2:  $^{13}\text{C}$  NMR (101 MHz,  $\text{CDCl}_3$ )  $\delta$  164.7, 163.2 (t,  $^2J_{\text{C-F}} = 33.3$  Hz), 132.9, 125.1, 114.5, 114.2 (t,  $^1J_{\text{C-F}} = 252.5$  Hz), 68.3, 63.4, 55.9, 34.8 (t,  $^3J_{\text{C-F}} = 5.1$  Hz), 31.8 (t,  $^2J_{\text{C-F}} = 26.3$  Hz), 14.1.  $^{19}\text{F}$  NMR (282 MHz,  $\text{CDCl}_3$ )  $\delta$  -113.39. HRMS (ESI) for  $\text{C}_{15}\text{H}_{17}\text{BrF}_2\text{NaO}_5\text{S}$  [ $\text{M} + \text{Na}$ ] $^+$ , calcd: 448.9840, found: 448.9833.

**ethyl 2-(3-([1,1'-biphenyl]-4-ylsulfonyl)-3-bromocyclobutyl)-2,2-difluoroacetate (3d)**

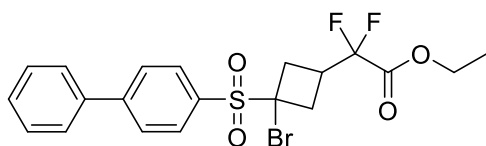

Prepared according to General Procedure A, compound **3d** was obtained as a beige solid (35 mg, 37 % yield,  $dr = 2.7:1$ ). Mixture of isomer 1 and isomer 2:  $^1\text{H}$  NMR (400 MHz,  $\text{CDCl}_3$ )  $\delta$  8.12 – 7.99 (m, 2H), 7.82 – 7.76 (m, 2H), 7.68 – 7.59 (m, 2H), 7.54 – 7.42 (m, 3H), 4.40 – 4.28 (m, 2H), 3.58 – 3.30 (m, 3H), 3.07 – 2.47 (m, 2H), 1.37 (t,  $J = 7.2$  Hz, 3H). Isomer 1:  $^{13}\text{C}$  NMR (75 MHz,  $\text{CDCl}_3$ )  $\delta$  163.1 (t,  $^2J_{\text{C-F}} = 33.0$  Hz), 147.8, 138.9, 132.4, 132.0, 131.2, 129.3, 129.1, 127.6, 127.6, 113.8 ( $^1J_{\text{C-F}} = 251.3$  Hz), 65.5, 63.4, 35.7 (t,  $^3J_{\text{C-F}} = 5.1$  Hz), 34.3 (t,  $^2J_{\text{C-F}} = 26.3$  Hz), 14.1.  $^{19}\text{F}$  NMR (282 MHz,  $\text{CDCl}_3$ )  $\delta$  -114.50. HRMS (ESI) for  $\text{C}_{20}\text{H}_{19}\text{BrF}_2\text{NaO}_4\text{S}$  [ $\text{M} + \text{Na}$ ] $^+$ , calcd: 495.0048, found: 495.0043. Isomer 2:  $^{13}\text{C}$  NMR (75 MHz,  $\text{CDCl}_3$ )  $\delta$  163.1 (t,  $^2J_{\text{C-F}} = 33.0$  Hz), 147.7, 138.9, 132.4, 131.8, 131.2, 129.3, 129.0, 127.7, 127.6, 114.1 (t,  $^1J_{\text{C-F}} = 250.5$  Hz), 67.9, 63.5, 34.8 (t,  $^3J_{\text{C-F}} = 5.3$  Hz), 31.9 (t,  $^2J_{\text{C-F}} = 26.3$  Hz), 14.1.  $^{19}\text{F}$  NMR (282 MHz,  $\text{CDCl}_3$ )  $\delta$  -113.37. HRMS (ESI) for  $\text{C}_{20}\text{H}_{19}\text{BrF}_2\text{NaO}_4\text{S}$  [ $\text{M} + \text{Na}$ ] $^+$ , calcd: 495.0048, found: 495.0043.

**ethyl 2-(3-bromo-3-((4-chlorophenyl)sulfonyl)cyclobutyl)-2,2-difluoroacetate (3e)**

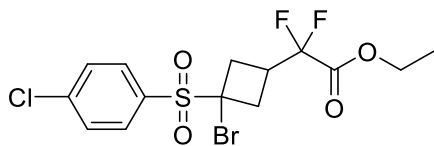

Prepared according to General Procedure A, compound **3e** was obtained as colorless oil (51 mg, 59 % yield,  $dr = 2.6:1$ ). Mixture of isomer 1 and isomer 2:  $^1\text{H}$  NMR (300 MHz,  $\text{CDCl}_3$ )  $\delta$  8.00 – 7.87 (m, 2H), 7.61 – 7.54 (m, 2H), 4.34 (qd,  $J = 7.2, 3.7$  Hz, 2H), 3.54 – 3.27 (m, 3H), 3.05 – 2.43

(m, 2H), 1.36 (td,  $J = 7.2, 1.7$  Hz, 3H). Isomer 1:  $^{13}\text{C}$  NMR (75 MHz,  $\text{CDCl}_3$ )  $\delta$  163.1 (t,  $^2J_{\text{C-F}} = 33.0$  Hz), 142.1, 132.4, 132.1, 129.5, 114.1 (t,  $^1J_{\text{C-F}} = 224.3$  Hz), 65.3, 63.5, 35.7 (t,  $^3J_{\text{C-F}} = 5.3$  Hz), 34.3 (t,  $^2J_{\text{C-F}} = 25.5$  Hz), 14.1.  $^{19}\text{F}$  NMR (282 MHz,  $\text{CDCl}_3$ )  $\delta$  -114.53. HRMS (ESI) for  $\text{C}_{14}\text{H}_{14}\text{BrClF}_2\text{NaO}_4\text{S}$   $[\text{M} + \text{Na}]^+$ , calcd: 452.9345, found: 452.9346. Isomer 2:  $^{13}\text{C}$  NMR (75 MHz,  $\text{CDCl}_3$ )  $\delta$  163.1 (t,  $^2J_{\text{C-F}} = 33.0$  Hz), 141.9, 132.6, 132.1, 129.7, 114.1 (t,  $^1J_{\text{C-F}} = 224.3$  Hz), 67.6, 63.5, 34.7 (t,  $^3J_{\text{C-F}} = 5.3$  Hz), 31.8 (t,  $^2J_{\text{C-F}} = 26.3$  Hz), 14.1.  $^{19}\text{F}$  NMR (282 MHz,  $\text{CDCl}_3$ )  $\delta$  -113.45. HRMS (ESI) for  $\text{C}_{14}\text{H}_{14}\text{BrClF}_2\text{NaO}_4\text{S}$   $[\text{M} + \text{Na}]^+$ , calcd: 452.9345, found: 452.9346.

**ethyl 2-(3-bromo-3-((4-bromophenyl)sulfonyl)cyclobutyl)-2,2-difluoroacetate (3f)**

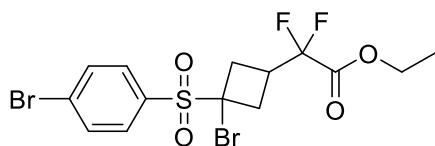

Prepared according to General Procedure A, compound **3f** was obtained as colorless oil (50 mg, 52 % yield,  $dr = 2.2:1$ ). Mixture of isomer 1 and isomer 2:  $^1\text{H}$  NMR (300 MHz,  $\text{CDCl}_3$ )  $\delta$  7.91 – 7.78 (m, 2H), 7.77 – 7.69 (m, 2H), 4.38 – 4.27 (m, 2H), 3.53 – 3.26 (m, 3H), 3.07 – 2.41 (m, 2H), 1.39 – 1.31 (m, 3H). Isomer 1:  $^{13}\text{C}$  NMR (101 MHz,  $\text{CDCl}_3$ )  $\delta$  163.1 (t,  $^2J_{\text{C-F}} = 33.3$  Hz), 133.1, 132.6, 132.1, 130.7, 113.7 (t,  $^1J_{\text{C-F}} = 251.5$  Hz), 65.3, 63.4, 35.7 (t,  $^3J_{\text{C-F}} = 5.1$  Hz), 34.3 (t,  $^2J_{\text{C-F}} = 26.3$  Hz), 14.1.  $^{19}\text{F}$  NMR (282 MHz,  $\text{CDCl}_3$ )  $\delta$  -114.51. HRMS (ESI) for  $\text{C}_{14}\text{H}_{14}\text{Br}_2\text{F}_2\text{NaO}_4\text{S}$   $[\text{M} + \text{Na}]^+$ , calcd: 496.8840, found: 496.8847. Isomer 2:  $^{13}\text{C}$  NMR (101 MHz,  $\text{CDCl}_3$ )  $\delta$  163.1 (t,  $^2J_{\text{C-F}} = 33.3$  Hz), 132.6, 132.5, 132.1, 130.5, 114.1 (t,  $^1J_{\text{C-F}} = 251.5$  Hz), 67.6, 63.5, 34.7 (t,  $^3J_{\text{C-F}} = 5.1$  Hz), 31.9 (t,  $^2J_{\text{C-F}} = 26.3$  Hz), 14.1.  $^{19}\text{F}$  NMR (282 MHz,  $\text{CDCl}_3$ )  $\delta$  -113.45. HRMS (ESI) for  $\text{C}_{14}\text{H}_{14}\text{Br}_2\text{F}_2\text{NaO}_4\text{S}$   $[\text{M} + \text{Na}]^+$ , calcd: 496.8840, found: 496.8847.

**ethyl 2-(3-bromo-3-((4-fluorophenyl)sulfonyl)cyclobutyl)-2,2-difluoroacetate (3g)**

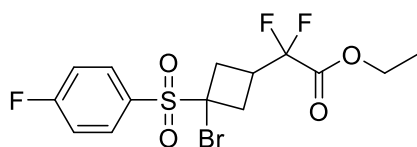

Prepared according to General Procedure A, compound **3g** was obtained as colorless oil (62 mg, 75 % yield,  $dr = 2.8:1$ ). Mixture of isomer 1 and isomer 2:  $^1\text{H}$  NMR (300 MHz,  $\text{CDCl}_3$ )  $\delta$  8.09 – 7.93 (m, 2H), 7.32 – 7.22 (m, 2H), 4.40 – 4.26 (m, 2H), 3.54 – 3.25 (m, 3H), 3.04 – 2.41 (m, 2H), 1.39 – 1.30 (m, 3H). Isomer 1:  $^{13}\text{C}$  NMR (101 MHz,  $\text{CDCl}_3$ )  $\delta$  168.0 (d,  $^1J_{\text{C-F}} = 259.6$  Hz), 163.1 (t,  $^2J_{\text{C-F}} = 33.3$  Hz), 134.2 (d,  $^3J_{\text{C-F}} = 9.1$  Hz), 129.6 (d,  $^4J_{\text{C-F}} = 3.0$  Hz), 116.7 (d,  $^2J_{\text{C-F}} = 22.2$  Hz), 113.8

(t,  $^1J_{C-F} = 252.5$  Hz), 65.5, 63.4, 35.7 (t,  $^3J_{C-F} = 5.1$  Hz), 34.3 (t,  $^2J_{C-F} = 26.3$  Hz), 14.1.  **$^{19}\text{F}$  NMR** (282 MHz,  $\text{CDCl}_3$ )  $\delta$  -101.20, -114.52. **HRMS** (ESI) for  $\text{C}_{14}\text{H}_{14}\text{BrF}_3\text{NaO}_4\text{S}$   $[\text{M} + \text{Na}]^+$ , calcd: 436.9641, found: 436.9635. Isomer 2:  **$^{13}\text{C}$  NMR** (101 MHz,  $\text{CDCl}_3$ )  $\delta$  167.9 (d,  $^1J_{C-F} = 259.6$  Hz), 163.1 (t,  $^2J_{C-F} = 33.3$  Hz), 133.6 (d,  $^3J_{C-F} = 10.1$  Hz), 130.0 (d,  $^4J_{C-F} = 3.0$  Hz), 116.8 (d,  $^2J_{C-F} = 23.2$  Hz), 114.1 (t,  $^1J_{C-F} = 252.5$  Hz), 67.8, 63.5, 34.7 (t,  $^3J_{C-F} = 5.1$  Hz), 31.8 (t,  $^2J_{C-F} = 26.3$  Hz), 14.1.  **$^{19}\text{F}$  NMR** (282 MHz,  $\text{CDCl}_3$ )  $\delta$  -101.48, -113.48. **HRMS** (ESI) for  $\text{C}_{14}\text{H}_{14}\text{BrF}_3\text{NaO}_4\text{S}$   $[\text{M} + \text{Na}]^+$ , calcd: 436.9641, found: 436.9635.

**ethyl 2-(3-bromo-3-((4-(trifluoromethyl)phenyl)sulfonyl)cyclobutyl)-2,2-difluoroacetate (3h)**

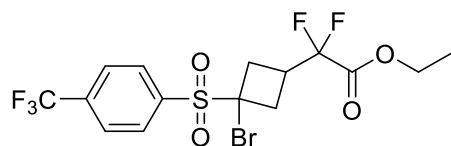

Prepared according to General Procedure A, compound **3h** was obtained as colorless oil (56 mg, 60 % yield,  $dr = 7:1$ ). Mixture of isomer 1 and isomer 2:  **$^1\text{H}$  NMR** (300 MHz,  $\text{CDCl}_3$ )  $\delta$  8.21 – 8.07 (m, 2H), 7.91 – 7.82 (m, 2H), 4.34 (q,  $J = 7.2$  Hz, 2H), 3.58 – 3.29 (m, 3H), 3.08 – 2.42 (m, 2H), 1.36 (t,  $J = 7.2$  Hz, 3H). Isomer 1:  **$^{13}\text{C}$  NMR** (101 MHz,  $\text{CDCl}_3$ )  $\delta$  163.1 (t,  $^2J_{C-F} = 33.3$  Hz), 137.9, 136.9 (q,  $^2J_{C-F} = 33.3$  Hz), 131.9, 126.4 (q,  $^3J_{C-F} = 4.0$  Hz), 124.5 (q,  $^1J_{C-F} = 274.7$  Hz), 114.0 (t,  $^1J_{C-F} = 252.5$  Hz), 65.1, 63.5, 35.7 (t,  $^3J_{C-F} = 5.1$  Hz), 34.4 (t,  $^2J_{C-F} = 28.3$  Hz), 14.1.  **$^{19}\text{F}$  NMR** (282 MHz,  $\text{CDCl}_3$ )  $\delta$  -63.30, -114.54. **HRMS** (ESI) for  $\text{C}_{15}\text{H}_{14}\text{BrF}_5\text{NaO}_4\text{S}$   $[\text{M} + \text{Na}]^+$ , calcd: 486.9609, found: 486.9619. Isomer 2:  **$^{13}\text{C}$  NMR** (101 MHz,  $\text{CDCl}_3$ )  $\delta$  163.1 (t,  $^2J_{C-F} = 33.3$  Hz), 137.9, 136.9 (q,  $^2J_{C-F} = 33.3$  Hz), 131.3, 126.4 (q,  $^3J_{C-F} = 4.0$  Hz), 124.5 (q,  $^1J_{C-F} = 274.7$  Hz), 114.0 (t,  $^1J_{C-F} = 252.5$  Hz), 67.3, 63.5, 34.7 (t,  $^3J_{C-F} = 5.1$  Hz), 32.0 (t,  $^2J_{C-F} = 27.3$  Hz), 14.1.  **$^{19}\text{F}$  NMR** (282 MHz,  $\text{CDCl}_3$ )  $\delta$  -63.28, -113.52. **HRMS** (ESI) for  $\text{C}_{15}\text{H}_{14}\text{BrF}_5\text{NaO}_4\text{S}$   $[\text{M} + \text{Na}]^+$ , calcd: 486.9609, found: 486.9619.

**ethyl 2-(3-bromo-3-((4-(trifluoromethoxy)phenyl)sulfonyl)cyclobutyl)-2,2-difluoroacetate (3i)**

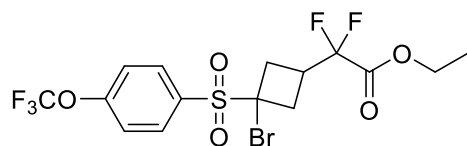

Prepared according to General Procedure A, compound **3i** was obtained as colorless oil (61 mg, 63 % yield,  $dr = 2.2:1$ ). Mixture of isomer 1 and isomer 2:  **$^1\text{H}$  NMR** (400 MHz,  $\text{CDCl}_3$ )  $\delta$  8.12 – 8.00 (m, 2H), 7.44 – 7.38 (m, 2H), 4.38 – 4.28 (m, 2H), 3.53 – 3.30 (m, 3H), 3.07 – 2.45 (m, 2H),

1.36 (t,  $J = 7.1$  Hz, 3H). Isomer 1:  $^{13}\text{C}$  NMR (101 MHz,  $\text{CDCl}_3$ )  $\delta$  163.1 (t,  $^2J_{\text{C-F}} = 33.3$  Hz), 154.0, 133.6, 131.7, 121.6 (q,  $^1J_{\text{C-F}} = 261.6$  Hz), 120.6, 114.1 (t,  $^1J_{\text{C-F}} = 252.5$  Hz), 65.3, 63.5, 35.7 (t,  $^3J_{\text{C-F}} = 5.1$  Hz), 34.3 (t,  $^2J_{\text{C-F}} = 26.3$  Hz), 14.1.  $^{19}\text{F}$  NMR (282 MHz,  $\text{CDCl}_3$ )  $\delta$  -57.59, -114.54. HRMS (ESI) for  $\text{C}_{15}\text{H}_{14}\text{BrF}_5\text{NaO}_5\text{S}$   $[\text{M} + \text{Na}]^+$ , calcd: 502.9558, found: 502.9558. Isomer 2:  $^{13}\text{C}$  NMR (101 MHz,  $\text{CDCl}_3$ )  $\delta$  163.1 (t,  $^2J_{\text{C-F}} = 33.3$  Hz), 153.9, 133.0, 132.2, 121.6 (q,  $^1J_{\text{C-F}} = 261.6$  Hz), 120.7, 114.1 (t,  $^1J_{\text{C-F}} = 252.5$  Hz), 67.6, 63.5, 34.7 (t,  $^3J_{\text{C-F}} = 5.1$  Hz), 31.9 (t,  $^2J_{\text{C-F}} = 27.3$  Hz), 14.1.  $^{19}\text{F}$  NMR (282 MHz,  $\text{CDCl}_3$ )  $\delta$  -57.61, -113.49. HRMS (ESI) for  $\text{C}_{15}\text{H}_{14}\text{BrF}_5\text{NaO}_5\text{S}$   $[\text{M} + \text{Na}]^+$ , calcd: 502.9558, found: 502.9558.

**ethyl 2-(3-bromo-3-((3-fluorophenyl)sulfonyl)cyclobutyl)-2,2-difluoroacetate (3j)**

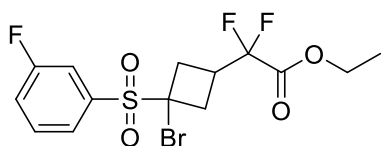

Prepared according to General Procedure A, compound **3j** was obtained as colorless oil (46 mg, 55 % yield,  $dr = 2.4:1$ ). Mixture of isomer 1 and isomer 2:  $^1\text{H}$  NMR (400 MHz,  $\text{CDCl}_3$ )  $\delta$  7.85 – 7.66 (m, 2H), 7.64 – 7.56 (m, 1H), 7.47 – 7.39 (m, 1H), 4.34 (qd,  $J = 7.1, 4.6$  Hz, 2H), 3.55 – 3.30 (m, 3H), 3.06 – 2.46 (m, 2H), 1.36 (td,  $J = 7.1, 2.4$  Hz, 3H). Isomer 1:  $^{13}\text{C}$  NMR (101 MHz,  $\text{CDCl}_3$ )  $\delta$  163.6 (d,  $^1J_{\text{C-F}} = 253.5$  Hz), 163.1 (t,  $^2J_{\text{C-F}} = 33.3$  Hz), 135.7 (d,  $^3J = 7.1$  Hz), 130.9 (d,  $^3J_{\text{C-F}} = 7.1$  Hz), 127.1 (d,  $^4J_{\text{C-F}} = 3.0$  Hz), 122.4 (d,  $^2J_{\text{C-F}} = 21.2$  Hz), 118.7 (d,  $^2J_{\text{C-F}} = 25.3$  Hz), 113.7 (t,  $^1J_{\text{C-F}} = 252.5$  Hz), 65.2, 63.5, 35.7 (t,  $^3J_{\text{C-F}} = 5.1$  Hz), 34.3 (t,  $^2J_{\text{C-F}} = 26.3$  Hz), 14.1.  $^{19}\text{F}$  NMR (282 MHz,  $\text{CDCl}_3$ )  $\delta$  -109.07, -114.53. HRMS (ESI) for  $\text{C}_{14}\text{H}_{14}\text{BrF}_3\text{NaO}_4\text{S}$   $[\text{M} + \text{Na}]^+$ , calcd: 436.9641, found: 436.9638. Isomer 2:  $^{13}\text{C}$  NMR (101 MHz,  $\text{CDCl}_3$ )  $\delta$  163.7 (d,  $^1J_{\text{C-F}} = 253.5$  Hz), 163.1 (t,  $^2J_{\text{C-F}} = 33.3$  Hz), 136.1 (d,  $^3J = 6.1$  Hz), 131.1 (d,  $^3J_{\text{C-F}} = 7.1$  Hz), 126.5 (d,  $^4J_{\text{C-F}} = 3.0$  Hz), 122.3 (d,  $^2J_{\text{C-F}} = 21.2$  Hz), 118.1 (d,  $^2J_{\text{C-F}} = 24.2$  Hz), 114.1 (t,  $^1J_{\text{C-F}} = 252.5$  Hz), 67.4, 63.5, 34.7 (t,  $^3J_{\text{C-F}} = 5.1$  Hz), 31.9 (t,  $^2J_{\text{C-F}} = 26.3$  Hz), 14.1.  $^{19}\text{F}$  NMR (282 MHz,  $\text{CDCl}_3$ )  $\delta$  -108.97, -113.46. HRMS (ESI) for  $\text{C}_{14}\text{H}_{14}\text{BrF}_3\text{NaO}_4\text{S}$   $[\text{M} + \text{Na}]^+$ , calcd: 436.9641, found: 436.9638.

**ethyl 2-(3-bromo-3-((2-fluorophenyl)sulfonyl)cyclobutyl)-2,2-difluoroacetate (3k)**

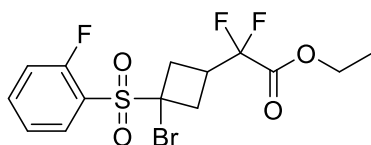

Prepared according to General Procedure A, compound **3k** was obtained as colorless oil (34

mg, 41 % yield, *dr* = 2.1:1). Mixture of isomer 1 and isomer 2: **<sup>1</sup>H NMR** (300 MHz, CDCl<sub>3</sub>) δ 8.05 – 7.94 (m, 1H), 7.76 – 7.64 (m, 1H), 7.41 – 7.33 (m, 1H), 7.31 – 7.21 (m, 1H), 4.33 (qd, *J* = 7.2, 3.9 Hz, 2H), 3.65 – 3.22 (m, 3H), 3.14 – 2.52 (m, 2H), 1.35 (td, *J* = 7.2, 2.5 Hz, 3H). Isomer 1: **<sup>13</sup>C NMR** (101 MHz, CDCl<sub>3</sub>) δ 163.1 (t, <sup>2</sup>*J*<sub>C-F</sub> = 33.3 Hz), 161.1 (d, <sup>1</sup>*J*<sub>C-F</sub> = 259.6 Hz), 137.4 (d, <sup>3</sup>*J*<sub>C-F</sub> = 9.1 Hz), 134.0, 124.7 (d, <sup>3</sup>*J*<sub>C-F</sub> = 4.0 Hz), 122.9 (d, <sup>2</sup>*J*<sub>C-F</sub> = 15.2 Hz), 117.8 (d, <sup>2</sup>*J*<sub>C-F</sub> = 22.2 Hz), 113.9 (t, <sup>1</sup>*J*<sub>C-F</sub> = 252.5 Hz), 66.2, 63.4, 35.5 (q, <sup>3</sup>*J*<sub>C-F</sub> = 5.1 Hz), 34.2 (t, <sup>2</sup>*J*<sub>C-F</sub> = 26.3 Hz), 14.1. **<sup>19</sup>F NMR** (282 MHz, CDCl<sub>3</sub>) δ -103.55, -114.52. **HRMS** (ESI) for C<sub>14</sub>H<sub>14</sub>BrF<sub>3</sub>NaO<sub>4</sub>S [M + Na]<sup>+</sup>, calcd: 436.9641, found: 436.9636. Isomer 2: **<sup>13</sup>C NMR** (101 MHz, CDCl<sub>3</sub>) δ 163.1 (t, <sup>2</sup>*J*<sub>C-F</sub> = 33.3 Hz), 160.9 (d, <sup>1</sup>*J*<sub>C-F</sub> = 258.6 Hz), 137.2 (d, <sup>3</sup>*J*<sub>C-F</sub> = 8.1 Hz), 133.0, 124.8 (d, <sup>3</sup>*J*<sub>C-F</sub> = 4.0 Hz), 123.3 (d, <sup>2</sup>*J*<sub>C-F</sub> = 15.2 Hz), 117.5 (d, <sup>2</sup>*J*<sub>C-F</sub> = 21.2 Hz), 114.2 (t, <sup>1</sup>*J*<sub>C-F</sub> = 252.5 Hz), 68.1, 63.4, 35.1 (q, <sup>3</sup>*J*<sub>C-F</sub> = 5.1 Hz), 32.1 (t, <sup>2</sup>*J*<sub>C-F</sub> = 26.3 Hz), 14.1. **<sup>19</sup>F NMR** (282 MHz, CDCl<sub>3</sub>) δ -105.35, -113.37. **HRMS** (ESI) for C<sub>14</sub>H<sub>14</sub>BrF<sub>3</sub>NaO<sub>4</sub>S [M + Na]<sup>+</sup>, calcd: 436.9641, found: 436.9636.

**methyl 2-(3-bromo-3-(phenylsulfonyl)cyclobutyl)-2,2-difluoroacetate (3l)**

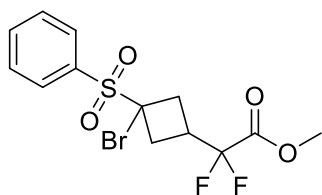

Prepared according to General Procedure A, compound **3l** was obtained as colorless oil (45 mg, 59 % yield, *dr* = 3:1). Mixture of isomer 1 and isomer 2: **<sup>1</sup>H NMR** (300 MHz, CDCl<sub>3</sub>) δ 8.06 – 7.92 (m, 2H), 7.76 – 7.67 (m, 1H), 7.64 – 7.55 (m, 2H), 3.88 (d, *J* = 3.7 Hz, 3H), 3.54 – 3.26 (m, 3H), 3.06 – 2.41 (m, 2H). Isomer 1: **<sup>13</sup>C NMR** (101 MHz, CDCl<sub>3</sub>) δ 163.6 (t, <sup>2</sup>*J*<sub>C-F</sub> = 33.3 Hz), 135.0, 133.6, 131.3, 129.1, 113.8 (t, <sup>1</sup>*J*<sub>C-F</sub> = 251.5 Hz), 65.3, 53.7, 35.7 (t, <sup>3</sup>*J*<sub>C-F</sub> = 5.1 Hz), 34.3 (t, <sup>2</sup>*J*<sub>C-F</sub> = 26.3 Hz). **<sup>19</sup>F NMR** (282 MHz, CDCl<sub>3</sub>) δ -114.29. **HRMS** (ESI) for C<sub>13</sub>H<sub>13</sub>BrF<sub>2</sub>NaO<sub>4</sub>S [M + Na]<sup>+</sup>, calcd: 404.9578, found: 404.9573. Isomer 2: **<sup>13</sup>C NMR** (101 MHz, CDCl<sub>3</sub>) δ 163.6 (t, <sup>2</sup>*J*<sub>C-F</sub> = 33.3 Hz), 134.8, 134.0, 130.7, 129.2, 114.2 (t, <sup>1</sup>*J*<sub>C-F</sub> = 252.5 Hz), 67.7, 53.8, 34.7 (t, <sup>3</sup>*J*<sub>C-F</sub> = 5.1 Hz), 31.8 (t, <sup>2</sup>*J*<sub>C-F</sub> = 26.3 Hz). **<sup>19</sup>F NMR** (282 MHz, CDCl<sub>3</sub>) δ -113.15. **HRMS** (ESI) for C<sub>13</sub>H<sub>13</sub>BrF<sub>2</sub>NaO<sub>4</sub>S [M + Na]<sup>+</sup>, calcd: 404.9578, found: 404.9573.

**benzyl 2-(3-bromo-3-(phenylsulfonyl)cyclobutyl)-2,2-difluoroacetate (3m)**

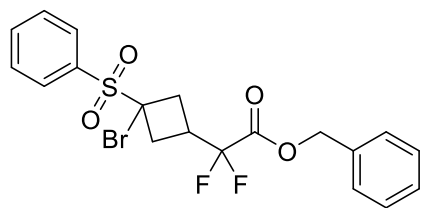

Prepared according to General Procedure A, compound **3m** was obtained as colorless oil (49 mg, 53 % yield, *dr* = 3.1:1). Mixture of isomer 1 and isomer 2: **<sup>1</sup>H NMR** (300 MHz, CDCl<sub>3</sub>) δ 8.04 – 7.90 (m, 2H), 7.77 – 7.67 (m, 1H), 7.63 – 7.53 (m, 2H), 7.44 – 7.33 (m, 5H), 5.28 (d, *J* = 4.2 Hz, 2H), 3.54 – 3.24 (m, 3H), 3.04 – 2.37 (m, 2H). Isomer 1: **<sup>13</sup>C NMR** (101 MHz, CDCl<sub>3</sub>) δ 162.9 (t, <sup>2</sup>*J*<sub>C-F</sub> = 33.3 Hz), 134.9, 133.9, 131.2, 130.6, 129.2, 129.1, 128.9, 128.6, 113.8 (t, <sup>1</sup>*J*<sub>C-F</sub> = 252.5 Hz), 68.7, 65.3, 35.6 (t, <sup>3</sup>*J*<sub>C-F</sub> = 5.1 Hz), 34.3 (t, <sup>2</sup>*J*<sub>C-F</sub> = 26.3 Hz). **<sup>19</sup>F NMR** (282 MHz, CDCl<sub>3</sub>) δ -114.36. **HRMS** (ESI) for C<sub>19</sub>H<sub>17</sub>BrF<sub>2</sub>NaO<sub>4</sub>S [M + Na]<sup>+</sup>, calcd: 480.9891, found: 480.9889. Isomer 2: **<sup>13</sup>C NMR** (101 MHz, CDCl<sub>3</sub>) δ 162.9 (t, <sup>2</sup>*J*<sub>C-F</sub> = 33.3 Hz), 134.8, 134.0, 131.2, 130.6, 129.2, 129.1, 128.9, 128.6, 114.2 (t, <sup>1</sup>*J*<sub>C-F</sub> = 252.5 Hz), 68.8, 67.6, 34.7 (t, <sup>3</sup>*J*<sub>C-F</sub> = 5.1 Hz), 31.8 (t, <sup>2</sup>*J*<sub>C-F</sub> = 26.3 Hz). **<sup>19</sup>F NMR** (282 MHz, CDCl<sub>3</sub>) δ -113.22. **HRMS** (ESI) for C<sub>19</sub>H<sub>17</sub>BrF<sub>2</sub>NaO<sub>4</sub>S [M + Na]<sup>+</sup>, calcd: 480.9891, found: 480.9889.

#### 4-methoxybenzyl 2-(3-bromo-3-(phenylsulfonyl)cyclobutyl)-2,2-difluoroacetate (**3n**)

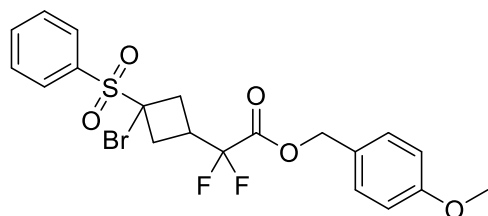

Prepared according to General Procedure A, compound **3n** was obtained as colorless oil (47 mg, 48 % yield, *dr* = 2.9:1). Mixture of isomer 1 and isomer 2: **<sup>1</sup>H NMR** (300 MHz, CDCl<sub>3</sub>) δ 8.02 – 7.90 (m, 2H), 7.76 – 7.67 (m, 1H), 7.63 – 7.54 (m, 2H), 7.31 (dd, *J* = 8.8, 2.4 Hz, 2H), 6.91 (dd, *J* = 8.9, 2.4 Hz, 2H), 5.22 (d, *J* = 3.9 Hz, 2H), 3.82 (d, *J* = 2.9 Hz, 3H), 3.54 – 3.21 (m, 3H), 3.01 – 2.35 (m, 2H). Isomer 1: **<sup>13</sup>C NMR** (101 MHz, CDCl<sub>3</sub>) δ 163.0 (t, <sup>2</sup>*J*<sub>C-F</sub> = 32.3 Hz), 160.4, 134.9, 133.6, 131.3, 130.7, 129.1, 126.2, 114.3, 114.2 (t, <sup>1</sup>*J*<sub>C-F</sub> = 252.5 Hz), 68.7, 65.4, 55.5, 35.7 (t, <sup>3</sup>*J*<sub>C-F</sub> = 5.1 Hz), 34.4 (t, <sup>2</sup>*J*<sub>C-F</sub> = 26.3 Hz). **<sup>19</sup>F NMR** (282 MHz, CDCl<sub>3</sub>) δ -114.54. **HRMS** (ESI) for C<sub>20</sub>H<sub>19</sub>BrF<sub>2</sub>NaO<sub>5</sub>S [M + Na]<sup>+</sup>, calcd: 510.9997, found: 510.9974. Isomer 2: **<sup>13</sup>C NMR** (101 MHz, CDCl<sub>3</sub>) δ 163.0 (t, <sup>2</sup>*J*<sub>C-F</sub> = 32.3 Hz), 160.3, 134.8, 134.0, 130.7, 130.7, 129.2, 126.2, 114.3, 114.0 (t,



$^1J_{C-F} = 252.5$  Hz), 68.8, 67.7, 55.5, 34.7 (t,  $^3J_{C-F} = 5.1$  Hz), 31.9 (t,  $^2J_{C-F} = 26.3$  Hz).  $^{19}\text{F}$  NMR (282 MHz,  $\text{CDCl}_3$ )  $\delta$  -113.28. **HRMS** (ESI) for  $\text{C}_{20}\text{H}_{19}\text{BrF}_2\text{NaO}_5\text{S}$  [ $\text{M} + \text{Na}$ ] $^+$ , calcd: 510.9997, found: 510.9974.

**cyclobutyl 2-(3-bromo-3-(phenylsulfonyl)cyclobutyl)-2,2-difluoroacetate (3o)**

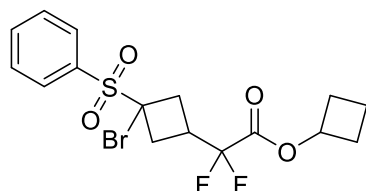

Prepared according to General Procedure A, compound **3o** was obtained as colorless oil (56 mg, 66 % yield,  $dr = 2.4:1$ ). Mixture of isomer 1 and isomer 2:  $^1\text{H}$  NMR (300 MHz,  $\text{CDCl}_3$ )  $\delta$  8.07 – 7.93 (m, 2H), 7.77 – 7.68 (m, 1H), 7.65 – 7.55 (m, 2H), 5.18 – 5.04 (m, 1H), 3.56 – 3.23 (m, 3H), 3.05 – 2.35 (m, 4H), 2.26 – 2.06 (m, 2H), 1.94 – 1.81 (m, 1H), 1.75 – 1.62 (m, 1H). Isomer 1:  $^{13}\text{C}$  NMR (101 MHz,  $\text{CDCl}_3$ )  $\delta$  162.3 (t,  $^2J_{C-F} = 33.3$  Hz), 134.9, 133.6, 131.3, 129.1, 113.7 (t,  $^1J_{C-F} = 252.5$  Hz), 71.6, 65.4, 35.7 (t,  $^3J_{C-F} = 5.1$  Hz), 34.3 (t,  $^2J_{C-F} = 26.3$  Hz), 30.2, 13.5.  $^{19}\text{F}$  NMR (282 MHz,  $\text{CDCl}_3$ )  $\delta$  -114.59. **HRMS** (ESI) for  $\text{C}_{16}\text{H}_{17}\text{BrF}_2\text{NaO}_4\text{S}$  [ $\text{M} + \text{Na}$ ] $^+$ , calcd: 444.9891, found: 444.9882. Isomer 2:  $^{13}\text{C}$  NMR (101 MHz,  $\text{CDCl}_3$ )  $\delta$  162.4 (t,  $^2J_{C-F} = 32.3$  Hz), 134.8, 134.0, 130.7, 129.2, 114.0 (t,  $^1J_{C-F} = 252.5$  Hz), 71.7, 67.8, 34.7 (t,  $^3J_{C-F} = 5.1$  Hz), 31.9 (t,  $^2J_{C-F} = 26.3$  Hz), 30.2, 13.5.  $^{19}\text{F}$  NMR (282 MHz,  $\text{CDCl}_3$ )  $\delta$  -113.55. **HRMS** (ESI) for  $\text{C}_{16}\text{H}_{17}\text{BrF}_2\text{NaO}_4\text{S}$  [ $\text{M} + \text{Na}$ ] $^+$ , calcd: 444.9891, found: 444.9882.

**cyclohexyl 2-(3-bromo-3-(phenylsulfonyl)cyclobutyl)-2,2-difluoroacetate (3p)**

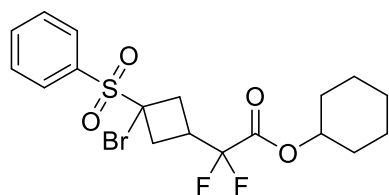

Prepared according to General Procedure A, compound **3p** was obtained as colorless oil (52 mg, 58 % yield,  $dr = 2.6:1$ ). Mixture of isomer 1 and isomer 2:  $^1\text{H}$  NMR (300 MHz,  $\text{CDCl}_3$ )  $\delta$  8.06 – 7.92 (m, 2H), 7.76 – 7.67 (m, 1H), 7.64 – 7.54 (m, 2H), 4.97 – 4.84 (m, 1H), 3.54 – 3.23 (m, 3H), 3.05 – 2.40 (m, 2H), 1.94 – 1.81 (m, 2H), 1.78 – 1.70 (m, 2H), 1.58 – 1.30 (m, 6H). Isomer 1:  $^{13}\text{C}$  NMR (75 MHz,  $\text{CDCl}_3$ )  $\delta$  162.5 (t,  $^2J_{C-F} = 32.3$  Hz), 134.9, 133.6, 131.2, 129.1, 114.1 (t,  $^1J_{C-F} = 250.5$  Hz), 76.4, 65.4, 35.7 (t,  $^3J_{C-F} = 5.3$  Hz), 34.3 (t,  $^2J_{C-F} = 26.3$  Hz), 31.2, 25.1, 23.5.  $^{19}\text{F}$  NMR (282 MHz,  $\text{CDCl}_3$ )  $\delta$  -114.64. **HRMS** (ESI) for  $\text{C}_{18}\text{H}_{21}\text{BrF}_2\text{NaO}_4\text{S}$  [ $\text{M} + \text{Na}$ ] $^+$ , calcd: 473.0204,

found: 473.0194. Isomer 2:  $^{13}\text{C}$  NMR (75 MHz,  $\text{CDCl}_3$ )  $\delta$  162.5 (t,  $^2J_{\text{C-F}} = 32.3$  Hz), 134.8, 134.0, 130.6, 129.2, 114.1 ( $^1J_{\text{C-F}} = 250.5$  Hz), 76.4, 67.8, 34.8 (t,  $^3J_{\text{C-F}} = 5.3$  Hz), 31.9 (t,  $^2J_{\text{C-F}} = 26.3$  Hz), 31.2, 25.1, 23.5.  $^{19}\text{F}$  NMR (282 MHz,  $\text{CDCl}_3$ )  $\delta$  -113.72. HRMS (ESI) for  $\text{C}_{18}\text{H}_{21}\text{BrF}_2\text{NaO}_4\text{S}$  [ $\text{M} + \text{Na}$ ] $^+$ , calcd: 473.0204, found: 473.0194.

### 2,3-dihydro-1H-inden-2-yl 2-(3-bromo-3-(phenylsulfonyl)cyclobutyl)-2,2-difluoroacetate (3q)

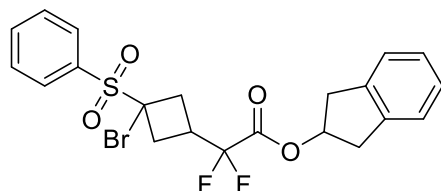

Prepared according to General Procedure A, compound **3q** was obtained as colorless oil (63 mg, 65 % yield,  $dr = 2.7:1$ ). Mixture of isomer 1 and isomer 2:  $^1\text{H}$  NMR (300 MHz,  $\text{CDCl}_3$ )  $\delta$  8.01 – 7.89 (m, 2H), 7.76 – 7.67 (m, 1H), 7.64 – 7.54 (m, 2H), 7.27 – 7.19 (m, 4H), 5.67 (t,  $J = 6.2, 3.0$  Hz, 1H), 3.49 – 3.21 (m, 5H), 3.14 – 3.02 (m, 2H), 3.00 – 2.32 (m, 2H). Isomer 1:  $^{13}\text{C}$  NMR (75 MHz,  $\text{CDCl}_3$ )  $\delta$  163.1 (t,  $^2J_{\text{C-F}} = 33.0$  Hz), 139.5, 134.9, 133.6, 131.2, 129.1, 127.3, 124.8, 114.1 (t,  $^1J_{\text{C-F}} = 249.8$  Hz), 78.8, 65.3, 39.5, 35.7 (t,  $^3J_{\text{C-F}} = 5.3$  Hz), 34.3 (t,  $^2J_{\text{C-F}} = 25.5$  Hz).  $^{19}\text{F}$  NMR (282 MHz,  $\text{CDCl}_3$ )  $\delta$  -114.51. HRMS (ESI) for  $\text{C}_{21}\text{H}_{19}\text{BrF}_2\text{NaO}_4\text{S}$  [ $\text{M} + \text{Na}$ ] $^+$ , calcd: 507.0048, found: 507.0039. Isomer 2:  $^{13}\text{C}$  NMR (75 MHz,  $\text{CDCl}_3$ )  $\delta$  163.1 (t,  $^2J_{\text{C-F}} = 33.0$  Hz), 139.5, 134.8, 134.0, 130.6, 129.2, 127.3, 124.8, 114.1 (t,  $^1J_{\text{C-F}} = 249.8$  Hz), 78.8, 67.7, 39.5, 34.7 (t,  $^3J_{\text{C-F}} = 5.3$  Hz), 31.9 (t,  $^2J_{\text{C-F}} = 26.3$  Hz).  $^{19}\text{F}$  NMR (282 MHz,  $\text{CDCl}_3$ )  $\delta$  -113.38. HRMS (ESI) for  $\text{C}_{21}\text{H}_{19}\text{BrF}_2\text{NaO}_4\text{S}$  [ $\text{M} + \text{Na}$ ] $^+$ , calcd: 507.0048, found: 507.0039.

### 4-phenylbutyl 2-(3-bromo-3-(phenylsulfonyl)cyclobutyl)-2,2-difluoroacetate (3r)

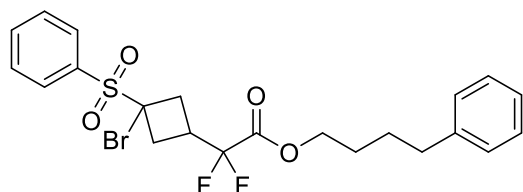

Prepared according to General Procedure A, compound **3r** was obtained as colorless oil (68 mg, 68 % yield,  $dr = 2.4:1$ ). Mixture of isomer 1 and isomer 2:  $^1\text{H}$  NMR (300 MHz,  $\text{CDCl}_3$ )  $\delta$  8.05 – 7.92 (m, 2H), 7.77 – 7.66 (m, 1H), 7.64 – 7.53 (m, 2H), 7.35 – 7.24 (m, 2H), 7.22 – 7.13 (m, 3H), 4.38 – 4.17 (m, 2H), 3.53 – 3.26 (m, 3H), 3.05 – 2.38 (m, 4H), 1.82 – 1.67 (m, 4H). Isomer 1:  $^{13}\text{C}$  NMR (75 MHz,  $\text{CDCl}_3$ )  $\delta$  163.2 (t,  $^2J_{\text{C-F}} = 32.3$  Hz), 141.7, 135.0, 133.6, 131.3, 129.1, 128.6, 128.5, 126.1, 114.2, 67.1, 65.4, 35.7 (t,  $^3J_{\text{C-F}} = 5.3$  Hz), 35.4, 34.3 (t,  $^2J_{\text{C-F}} = 26.3$  Hz), 27.9, 27.5.  $^{19}\text{F}$  NMR

(282 MHz, CDCl<sub>3</sub>)  $\delta$ -114.36. **HRMS** (ESI) for C<sub>22</sub>H<sub>23</sub>BrF<sub>2</sub>NaO<sub>4</sub>S [M + Na]<sup>+</sup>, calcd: 523.0361, found: 523.0358. Isomer 2: **<sup>13</sup>C NMR** (75 MHz, CDCl<sub>3</sub>)  $\delta$  163.2 (t, <sup>2</sup>J<sub>C-F</sub> = 32.3 Hz), 141.7, 134.8, 134.0, 130.7, 129.2, 128.6, 128.5, 126.1, 114.2, 67.7, 67.2, 35.4, 34.7 (t, <sup>3</sup>J<sub>C-F</sub> = 32.3 Hz), 31.86 (t, <sup>2</sup>J<sub>C-F</sub> = 26.3 Hz), 27.9, 27.55. **<sup>19</sup>F NMR** (282 MHz, CDCl<sub>3</sub>)  $\delta$  -113.32. **HRMS** (ESI) for C<sub>22</sub>H<sub>23</sub>BrF<sub>2</sub>NaO<sub>4</sub>S [M + Na]<sup>+</sup>, calcd: 523.0361, found: 523.0358.

**2-(trimethylsilyl)ethyl 2-(3-bromo-3-(phenylsulfonyl)cyclobutyl)-2,2-difluoroacetate (3s)**

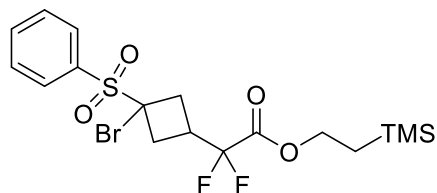

Prepared according to General Procedure A, compound **3s** was obtained as colorless oil (54 mg, 59 % yield, *dr* = 4.4:1). Mixture of isomer 1 and isomer 2: **<sup>1</sup>H NMR** (300 MHz, CDCl<sub>3</sub>)  $\delta$  8.07 – 7.92 (m, 2H), 7.76 – 7.68 (m, 1H), 7.65 – 7.55 (m, 2H), 4.41 – 4.30 (m, 2H), 3.56 – 3.26 (m, 3H), 3.05 – 2.40 (m, 2H), 1.13 – 1.01 (m, 2H), 0.06 (s, 9H). Isomer 1: **<sup>13</sup>C NMR** (75 MHz, CDCl<sub>3</sub>)  $\delta$  163.3 (t, <sup>2</sup>J<sub>C-F</sub> = 32.3 Hz), 135.0, 133.6, 131.3, 129.1, 114.1 (t, <sup>1</sup>J<sub>C-F</sub> = 250.5 Hz), 67.8, 65.4, 35.7 (t, <sup>3</sup>J<sub>C-F</sub> = 5.3 Hz), 34.3 (t, <sup>2</sup>J<sub>C-F</sub> = 26.3 Hz), 17.5, -1.5. **<sup>19</sup>F NMR** (282 MHz, CDCl<sub>3</sub>)  $\delta$  -114.56. **HRMS** (ESI) for C<sub>17</sub>H<sub>23</sub>BrF<sub>2</sub>NaO<sub>4</sub>SSi [M + Na]<sup>+</sup>, calcd: 491.0130, found: 491.0133. Isomer 2: **<sup>13</sup>C NMR** (75 MHz, CDCl<sub>3</sub>)  $\delta$  163.3 (t, <sup>2</sup>J<sub>C-F</sub> = 32.3 Hz), 134.8, 134.0, 130.7, 129.2, 114.1 (t, <sup>1</sup>J<sub>C-F</sub> = 250.5 Hz), 67.8, 66.1, 34.8 (t, <sup>3</sup>J<sub>C-F</sub> = 5.3 Hz), 31.9 (t, <sup>2</sup>J<sub>C-F</sub> = 26.3 Hz), 17.5, -1.5. **<sup>19</sup>F NMR** (282 MHz, CDCl<sub>3</sub>)  $\delta$  -113.51. **HRMS** (ESI) for C<sub>17</sub>H<sub>23</sub>BrF<sub>2</sub>NaO<sub>4</sub>SSi [M + Na]<sup>+</sup>, calcd: 491.0130, found: 491.0133.

**(3s,5s,7s)-adamantan-1-yl 2-(3-bromo-3-(phenylsulfonyl)cyclobutyl)-2,2-difluoroacetate (3t)**

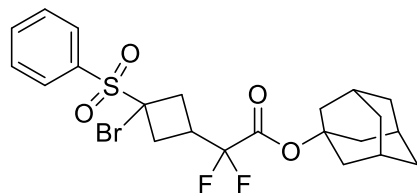

Prepared according to General Procedure A, compound **3t** was obtained as a white solid (51 mg, 51 % yield, *dr* = 2.8:1). Mixture of isomer 1 and isomer 2: **<sup>1</sup>H NMR** (300 MHz, CDCl<sub>3</sub>)  $\delta$  8.06 – 7.92 (m, 2H), 7.76 – 7.67 (m, 1H), 7.64 – 7.54 (m, 2H), 3.52 – 3.18 (m, 3H), 3.02 – 2.38 (m, 2H), 2.21 (s, 3H), 2.13 (s, 6H), 1.66 (s, 6H). Isomer 1: **<sup>13</sup>C NMR** (75 MHz, CDCl<sub>3</sub>)  $\delta$  161.6 (t, <sup>2</sup>J<sub>C-F</sub> = 32.3 Hz), 134.9, 133.6, 131.2, 129.1, 113.8 (t, <sup>1</sup>J<sub>C-F</sub> = 250.5 Hz), 85.5, 65.5, 41.1, 35.9, 35.8 (t, <sup>3</sup>J<sub>C-</sub>

$F = 5.3$  Hz), 34.4 (t,  $^2J_{C-F} = 26.3$  Hz), 31.0.  $^{19}\text{F}$  NMR (282 MHz,  $\text{CDCl}_3$ )  $\delta$  -114.63. HRMS (ESI) for  $\text{C}_{22}\text{H}_{25}\text{BrF}_2\text{NaO}_4\text{S}$   $[\text{M} + \text{Na}]^+$ , calcd: 525.0517, found: 525.0512. Isomer 2:  $^{13}\text{C}$  NMR (75 MHz,  $\text{CDCl}_3$ )  $\delta$  161.6 (t,  $^2J_{C-F} = 32.3$  Hz), 134.7, 134.1, 130.6, 129.2, 113.8 (t,  $^1J_{C-F} = 250.5$  Hz), 85.5, 68.0, 41.1, 35.9, 34.9 (t,  $^3J_{C-F} = 5.3$  Hz), 32.0 (t,  $^2J_{C-F} = 26.3$  Hz), 31.0.  $^{19}\text{F}$  NMR (282 MHz,  $\text{CDCl}_3$ )  $\delta$  -113.74. HRMS (ESI) for  $\text{C}_{22}\text{H}_{25}\text{BrF}_2\text{NaO}_4\text{S}$   $[\text{M} + \text{Na}]^+$ , calcd: 525.0517, found: 525.0512.

### 2-(3-bromo-3-(phenylsulfonyl)cyclobutyl)-2,2-difluoro-*N,N*-dimethylacetamide (3u)

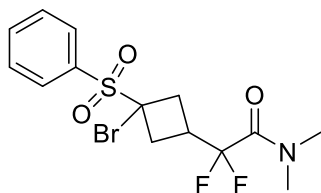

Prepared according to General Procedure A, compound **3u** was obtained as colorless oil (36 mg, 46 % yield,  $dr = 3.7:1$ ). Mixture of isomer 1 and isomer 2:  $^1\text{H}$  NMR (300 MHz,  $\text{CDCl}_3$ )  $\delta$  8.09 – 7.92 (m, 2H), 7.75 – 7.66 (m, 1H), 7.63 – 7.53 (m, 2H), 3.74 – 3.36 (m, 3H), 3.19 (s, 3H), 2.98 (s, 3H), 2.94 – 2.49 (m, 2H). Isomer 1:  $^{13}\text{C}$  NMR (75 MHz,  $\text{CDCl}_3$ )  $\delta$  162.3 (t,  $^2J_{C-F} = 29.3$  Hz), 134.8, 133.8, 131.3, 129.0, 117.8 (t,  $^1J_{C-F} = 255.0$  Hz), 66.3, 36.8, 36.3 (t,  $^3J_{C-F} = 5.3$  Hz), 34.7 (t,  $^2J_{C-F} = 25.5$  Hz).  $^{19}\text{F}$  NMR (282 MHz,  $\text{CDCl}_3$ )  $\delta$  -108.68. HRMS (ESI) for  $\text{C}_{14}\text{H}_{16}\text{BrF}_2\text{NNaO}_3\text{S}$   $[\text{M} + \text{Na}]^+$ , calcd: 417.9894, found: 417.9881. Isomer 2:  $^{13}\text{C}$  NMR (75 MHz,  $\text{CDCl}_3$ )  $\delta$  162.3 (t,  $^2J_{C-F} = 29.3$  Hz), 134.6, 134.3, 130.6, 129.1, 117.8 (t,  $^1J_{C-F} = 255.0$  Hz), 68.2, 36.7, 35.2 (t,  $^3J_{C-F} = 5.3$  Hz), 32.3 (t,  $^2J_{C-F} = 26.3$  Hz).  $^{19}\text{F}$  NMR (282 MHz,  $\text{CDCl}_3$ )  $\delta$  -108.22. HRMS (ESI) for  $\text{C}_{14}\text{H}_{16}\text{BrF}_2\text{NNaO}_3\text{S}$   $[\text{M} + \text{Na}]^+$ , calcd: 417.9894, found: 417.9881.

### 2-(3-bromo-3-(phenylsulfonyl)cyclobutyl)-2,2-difluoro-1-morpholinoethan-1-one (3v)

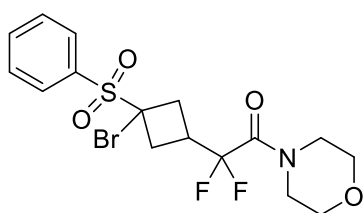

Prepared according to General Procedure A, compound **3v** was obtained as a white solid (37 mg, 42 % yield,  $dr = 4.1:1$ ). Mixture of isomer 1 and isomer 2:  $^1\text{H}$  NMR (300 MHz,  $\text{CDCl}_3$ )  $\delta$  8.09 – 7.92 (m, 2H), 7.75 – 7.66 (m, 1H), 7.63 – 7.51 (m, 2H), 3.79 – 3.66 (m, 6H), 3.66 – 3.38 (m, 5H), 2.96 – 2.49 (m, 2H). Isomer 1:  $^{13}\text{C}$  NMR (101 MHz,  $\text{CDCl}_3$ )  $\delta$  161.0 (t,  $^2J_{C-F} = 29.3$  Hz), 134.8, 133.8, 130.6, 129.1, 118.0 (t,  $^1J_{C-F} = 257.6$  Hz), 66.9, 66.7, 66.2, 46.4 (t,  $^3J_{C-F} = 6.1$  Hz), 43.3, 36.3

(t,  $^3J_{C-F} = 6.1$  Hz), 34.6 (t,  $^2J_{C-F} = 26.3$  Hz).  $^{19}\text{F}$  NMR (282 MHz,  $\text{CDCl}_3$ )  $\delta$  -108.02. HRMS (ESI) for  $\text{C}_{16}\text{H}_{18}\text{BrF}_2\text{NNaO}_4\text{S}$   $[\text{M} + \text{Na}]^+$ , calcd: 460.0000, found: 459.9996. Isomer 2:  $^{13}\text{C}$  NMR (101 MHz,  $\text{CDCl}_3$ )  $\delta$  161.0 (t,  $^2J_{C-F} = 29.3$  Hz), 134.7, 134.3, 131.3, 129.0, 118.0 (t,  $^1J_{C-F} = 257.6$  Hz), 68.1, 66.9, 66.7, 46.4 (t,  $^3J_{C-F} = 6.1$  Hz), 43.3, 35.2 (t,  $^3J_{C-F} = 6.1$  Hz), 32.2 (t,  $J = 26.3$  Hz).  $^{19}\text{F}$  NMR (282 MHz,  $\text{CDCl}_3$ )  $\delta$  -107.58. HRMS (ESI) for  $\text{C}_{16}\text{H}_{18}\text{BrF}_2\text{NNaO}_4\text{S}$   $[\text{M} + \text{Na}]^+$ , calcd: 460.0000, found: 459.9996.

### 2-(3-bromo-3-(phenylsulfonyl)cyclobutyl)-2,2-difluoro-1-phenylethan-1-one (3w)

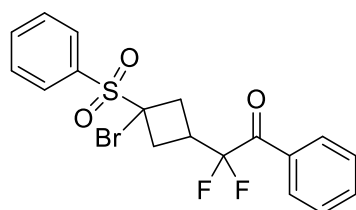

Prepared according to General Procedure A, compound **3w** was obtained as colorless oil (43 mg, 50 % yield,  $dr = 4:1$ ). Mixture of isomer 1 and isomer 2:  $^1\text{H}$  NMR (300 MHz,  $\text{CDCl}_3$ )  $\delta$  8.14 – 7.93 (m, 4H), 7.75 – 7.48 (m, 6H), 3.73 – 3.41 (m, 3H), 3.05 – 2.50 (m, 2H). Isomer 1:  $^{13}\text{C}$  NMR (75 MHz,  $\text{CDCl}_3$ )  $\delta$  188.4 (t,  $^2J_{C-F} = 32.3$  Hz), 134.9, 134.7, 133.7, 131.4 (t,  $^3J_{C-F} = 3.8$  Hz), 131.3, 130.3 (t,  $^4J_{C-F} = 3.0$  Hz), 129.1, 128.9, 117.8 (t,  $^1J_{C-F} = 254.3$  Hz), 66.1, 36.1 (t,  $^3J_{C-F} = 5.3$  Hz), 33.8 (t,  $^2J_{C-F} = 25.5$  Hz).  $^{19}\text{F}$  NMR (282 MHz,  $\text{CDCl}_3$ )  $\delta$  -108.09. HRMS (ESI) for  $\text{C}_{18}\text{H}_{15}\text{BrF}_2\text{NaO}_3\text{S}$   $[\text{M} + \text{Na}]^+$ , calcd: 450.9786, found: 450.9785. Isomer 2:  $^{13}\text{C}$  NMR (75 MHz,  $\text{CDCl}_3$ )  $\delta$  188.4 (t,  $^2J_{C-F} = 32.3$  Hz), 134.9, 134.7, 134.2, 131.4 (t,  $^3J_{C-F} = 3.8$  Hz), 130.6, 130.3 (t,  $^4J_{C-F} = 3.0$  Hz), 129.2, 128.9, 117.8 (t,  $^1J_{C-F} = 254.3$  Hz), 68.3, 35.0 (t,  $^3J_{C-F} = 5.3$  Hz), 31.3 (t,  $^2J_{C-F} = 25.5$  Hz).  $^{19}\text{F}$  NMR (282 MHz,  $\text{CDCl}_3$ )  $\delta$  -107.30. HRMS (ESI) for  $\text{C}_{18}\text{H}_{15}\text{BrF}_2\text{NaO}_3\text{S}$   $[\text{M} + \text{Na}]^+$ , calcd: 450.9786, found: 450.9785.

### ethyl 2,2-difluoro-2-(3-(phenylsulfonyl)cyclobutyl)acetate (4a)

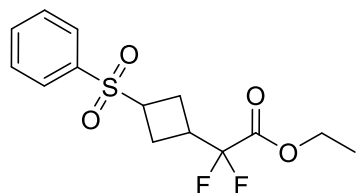

Prepared according to General Procedure B, compound **4a** was obtained as a light-yellow solid. (46 mg, 72 % yield,  $dr = 8:1$ ). Isomer 1:  $^1\text{H}$  NMR (400 MHz,  $\text{CDCl}_3$ )  $\delta$  7.89 (d,  $J = 7.5$  Hz, 2H), 7.67 (t,  $J = 7.5$  Hz, 1H), 7.57 (t,  $J = 7.8$  Hz, 2H), 4.30 (q,  $J = 7.1$  Hz, 2H), 3.85 – 3.73 (m, 1H), 3.24

- 3.06 (m, 1H), 2.79 – 2.65 (m, 2H), 2.53 – 2.41 (m, 2H), 1.33 (t,  $J = 7.2$  Hz, 3H).  $^{13}\text{C}$  NMR (75 MHz,  $\text{CDCl}_3$ )  $\delta$  163.4 (t,  $^2J_{\text{C-F}} = 33.0$  Hz), 137.5, 134.1, 129.6, 128.4, 115.4 (t,  $^2J_{\text{C-F}} = 249.8$  Hz), 63.2, 54.2, 34.0 (t,  $^2J_{\text{C-F}} = 24.8$  Hz), 22.2 (t,  $^3J_{\text{C-F}} = 5.3$  Hz), 14.1.  $^{19}\text{F}$  NMR (282 MHz,  $\text{CDCl}_3$ )  $\delta$  -113.77. HRMS (ESI) for  $\text{C}_{14}\text{H}_{16}\text{F}_2\text{NaO}_4\text{S}$   $[\text{M} + \text{Na}]^+$ , calcd: 341.0630, found: 341.0616. Isomer 2:  $^1\text{H}$  NMR (400 MHz,  $\text{CDCl}_3$ )  $\delta$  7.90 – 7.85 (m, 2H), 7.67 (t,  $J = 7.5$  Hz, 1H), 7.57 (t,  $J = 7.6$  Hz, 2H), 4.31 (q,  $J = 7.2$  Hz, 2H), 3.76 – 3.65 (m, 1H), 2.95 – 2.78 (m, 1H), 2.77 – 2.66 (m, 2H), 2.31 – 2.20 (m, 2H), 1.34 (t,  $J = 7.2$  Hz, 3H).  $^{13}\text{C}$  NMR (75 MHz,  $\text{CDCl}_3$ )  $\delta$  163.4 (t,  $^2J_{\text{C-F}} = 32.3$  Hz), 137.5, 134.1, 129.5, 128.5, 114.2 (t,  $^1J_{\text{C-F}} = 249.8$  Hz), 63.2, 52.2, 32.6 (t,  $^2J_{\text{C-F}} = 26.3$  Hz), 23.0 (t,  $^3J_{\text{C-F}} = 5.3$  Hz), 14.1.  $^{19}\text{F}$  NMR (282 MHz,  $\text{CDCl}_3$ )  $\delta$  -115.48. HRMS (ESI) for  $\text{C}_{14}\text{H}_{16}\text{F}_2\text{NaO}_4\text{S}$   $[\text{M} + \text{Na}]^+$ , calcd: 341.0630, found: 341.0616.

**ethyl 2,2-difluoro-2-(3-tosylcyclobutyl)acetate (4b)**

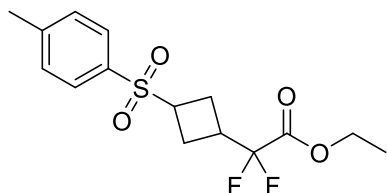

Prepared according to General Procedure B, compound **4b** was obtained as a light-yellow solid. (38 mg, 58 % yield,  $dr = 9:1$ ).  $^1\text{H}$  NMR (300 MHz,  $\text{CDCl}_3$ )  $\delta$  7.78 – 7.72 (m, 2H), 7.39 – 7.33 (m, 2H), 4.31 (q,  $J = 7.1$  Hz, 2H), 3.77 – 3.61 (m, 1H), 2.95 – 2.63 (m, 3H), 2.45 (s, 3H), 2.31 – 2.16 (m, 2H), 1.34 (t,  $J = 7.2$  Hz, 3H).  $^{13}\text{C}$  NMR (101 MHz,  $\text{CDCl}_3$ )  $\delta$  163.3 (t,  $^2J_{\text{C-F}} = 33.3$  Hz), 145.1, 134.5, 130.1, 128.4, 114.3 (t,  $^1J_{\text{C-F}} = 252.5$  Hz), 63.1, 52.2, 32.5 (t,  $^2J_{\text{C-F}} = 26.3$  Hz), 22.9 (t,  $^3J_{\text{C-F}} = 5.1$  Hz), 21.7, 14.0.  $^{19}\text{F}$  NMR (282 MHz,  $\text{CDCl}_3$ )  $\delta$  -113.72. HRMS (ESI) for  $\text{C}_{15}\text{H}_{18}\text{F}_2\text{NaO}_4\text{S}$   $[\text{M} + \text{Na}]^+$ , calcd: 355.0786, found: 355.0780.

**ethyl 2,2-difluoro-2-(3-((4-methoxyphenyl)sulfonyl)cyclobutyl)acetate (4c)**

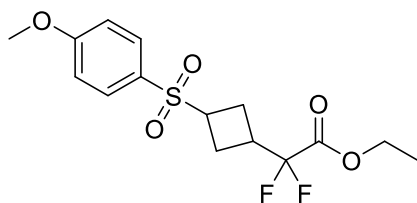

Prepared according to General Procedure B, compound **4c** was obtained as a light-yellow solid. (44 mg, 63 % yield,  $dr > 20:1$ ).  $^1\text{H}$  NMR (300 MHz,  $\text{CDCl}_3$ )  $\delta$  7.84 – 7.76 (m, 2H), 7.06 – 6.98 (m, 2H), 4.31 (q,  $J = 7.2$  Hz, 2H), 3.88 (s, 3H), 3.75 – 3.60 (m, 1H), 2.94 – 2.61 (m, 3H), 2.31 – 2.17 (m, 2H), 1.34 (t,  $J = 7.1$  Hz, 3H).  $^{13}\text{C}$  NMR (101 MHz,  $\text{CDCl}_3$ )  $\delta$  164.1, 163.4 (t,  $^2J_{\text{C-F}} = 32.3$  Hz),

130.7, 128.9, 114.7, 114.3 (t,  $^1J_{C-F} = 252.5$  Hz), 63.2, 55.8, 52.5, 32.5 (t,  $^2J_{C-F} = 27.3$  Hz), 23.1 (t,  $^3J_{C-F} = 5.1$  Hz), 14.1.  $^{19}\text{F}$  NMR (282 MHz,  $\text{CDCl}_3$ )  $\delta$  -113.73. HRMS (ESI) for  $\text{C}_{15}\text{H}_{18}\text{F}_2\text{NaO}_5\text{S} [\text{M} + \text{Na}]^+$ , calcd: 371.0735, found: 371.0724.

**ethyl 2-(3-([1,1'-biphenyl]-4-ylsulfonyl)cyclobutyl)-2,2-difluoroacetate (4d)**

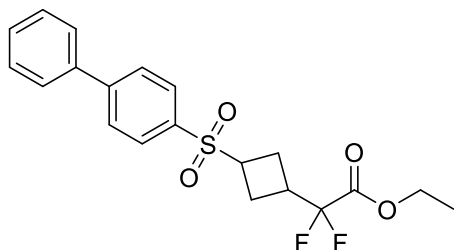

Prepared according to General Procedure B, compound **4d** was obtained as a beige solid. (32 mg, 41 % yield,  $dr > 20:1$ ).  $^1\text{H}$  NMR (300 MHz,  $\text{CDCl}_3$ )  $\delta$  7.98 – 7.89 (m, 2H), 7.81 – 7.73 (m, 2H), 7.66 – 7.58 (m, 2H), 7.53 – 7.40 (m, 3H), 4.32 (q,  $J = 7.2$  Hz, 2H), 3.75 (t,  $J = 8.7$  Hz, 1H), 2.98 – 2.68 (m, 3H), 2.36 – 2.22 (m, 2H), 1.35 (t,  $J = 7.2$  Hz, 3H).  $^{13}\text{C}$  NMR (101 MHz,  $\text{CDCl}_3$ )  $\delta$  163.4 (t,  $^2J_{C-F} = 33.3$  Hz), 147.0, 139.1, 136.1, 129.2, 129.0, 128.9, 128.1, 127.5, 114.3 (t,  $^1J_{C-F} = 251.5$  Hz), 63.2, 52.4, 32.6 (t,  $^2J_{C-F} = 26.3$  Hz), 23.1 (t,  $^3J_{C-F} = 5.1$  Hz), 14.1.  $^{19}\text{F}$  NMR (282 MHz,  $\text{CDCl}_3$ )  $\delta$  -113.70. HRMS (ESI) for  $\text{C}_{20}\text{H}_{20}\text{F}_2\text{NaO}_4\text{S} [\text{M} + \text{Na}]^+$ , calcd: 417.0943, found: 417.0936.

**ethyl 2-(3-((4-chlorophenyl)sulfonyl)cyclobutyl)-2,2-difluoroacetate (4e)**

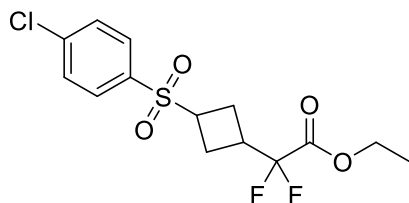

Prepared according to General Procedure B, compound **4e** was obtained as a beige solid. (43 mg, 61 % yield,  $dr > 20:1$ ).  $^1\text{H}$  NMR (300 MHz,  $\text{CDCl}_3$ )  $\delta$  7.84 – 7.78 (m, 2H), 7.58 – 7.51 (m, 2H), 4.31 (q,  $J = 7.2$  Hz, 2H), 3.76 – 3.63 (m, 1H), 3.00 – 2.63 (m, 3H), 2.33 – 2.20 (m, 2H), 1.34 (t,  $J = 7.2$  Hz, 3H).  $^{13}\text{C}$  NMR (75 MHz,  $\text{CDCl}_3$ )  $\delta$  163.3 (t,  $^2J_{C-F} = 33.3$  Hz), 140.9, 136.0, 129.9, 129.9, 114.2 (t,  $^1J_{C-F} = 249.8$  Hz), 63.2, 52.2, 32.5 (t,  $^2J_{C-F} = 26.3$  Hz), 22.9 (t,  $^3J_{C-F} = 5.3$  Hz), 14.0.  $^{19}\text{F}$  NMR (282 MHz,  $\text{CDCl}_3$ )  $\delta$  -113.81. HRMS (ESI) for  $\text{C}_{14}\text{H}_{15}\text{ClF}_2\text{NaO}_4\text{S} [\text{M} + \text{Na}]^+$ , calcd: 375.0240, found: 375.0231.

**ethyl 2-(3-((4-bromophenyl)sulfonyl)cyclobutyl)-2,2-difluoroacetate (4f)**

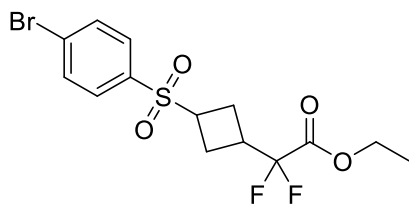

Prepared according to General Procedure B, compound **4f** was obtained as a light-yellow solid. (45 mg, 57 % yield, *dr* > 20:1). **<sup>1</sup>H NMR** (300 MHz, CDCl<sub>3</sub>) δ 7.73 (d, *J* = 1.2 Hz, 4H), 4.32 (q, *J* = 7.2 Hz, 2H), 3.77 – 3.62 (m, 1H), 3.00 – 2.64 (m, 3H), 2.35 – 2.19 (m, 2H), 1.34 (t, *J* = 7.2 Hz, 3H). **<sup>13</sup>C NMR** (75 MHz, CDCl<sub>3</sub>) δ 163.3 (t, <sup>2</sup>*J*<sub>C-F</sub> = 33.3 Hz), 136.6, 132.9, 130.0, 129.5, 114.2 (t, <sup>1</sup>*J*<sub>C-F</sub> = 249.8 Hz), 63.3, 52.3, 32.6 (t, <sup>2</sup>*J*<sub>C-F</sub> = 26.3 Hz), 23.0 (t, <sup>3</sup>*J*<sub>C-F</sub> = 5.3 Hz), 14.1. **<sup>19</sup>F NMR** (282 MHz, CDCl<sub>3</sub>) δ -113.80. **HRMS** (ESI) for C<sub>14</sub>H<sub>15</sub>BrF<sub>2</sub>NaO<sub>4</sub>S [M + Na]<sup>+</sup>, calcd: 418.9735, found: 418.9727.

**ethyl 2,2-difluoro-2-(3-((4-fluorophenyl)sulfonyl)cyclobutyl)acetate (4g)**

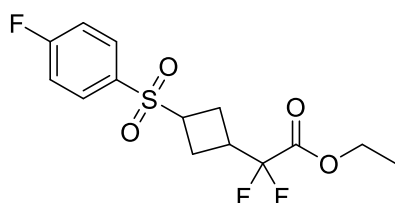

Prepared according to General Procedure B, compound **4g** was obtained as a yellow solid. (44 mg, 66 % yield, *dr* > 20:1). **<sup>1</sup>H NMR** (300 MHz, CDCl<sub>3</sub>) δ 7.93 – 7.86 (m, 2H), 7.29 – 7.21 (m, 2H, overlapping with CDCl<sub>3</sub> signal), 4.31 (q, *J* = 7.2 Hz, 2H), 3.78 – 3.62 (m, 1H), 2.99 – 2.62 (m, 3H), 2.33 – 2.20 (m, 2H), 1.34 (t, *J* = 7.2 Hz, 3H). **<sup>13</sup>C NMR** (75 MHz, CDCl<sub>3</sub>) δ 167.8 (d, <sup>1</sup>*J*<sub>C-F</sub> = 255.0 Hz), 163.3 (t, <sup>2</sup>*J*<sub>C-F</sub> = 33.3 Hz), 133.6 (d, <sup>4</sup>*J*<sub>C-F</sub> = 3.8 Hz), 131.4 (d, <sup>3</sup>*J*<sub>C-F</sub> = 9.0 Hz), 117.0 (t, <sup>2</sup>*J*<sub>C-F</sub> = 22.5 Hz), 114.2 (t, <sup>1</sup>*J*<sub>C-F</sub> = 249.8 Hz), 63.3, 52.4, 32.5 (t, <sup>2</sup>*J*<sub>C-F</sub> = 26.3 Hz), 23.0 (t, <sup>3</sup>*J*<sub>C-F</sub> = 5.3 Hz), 14.1. **<sup>19</sup>F NMR** (282 MHz, CDCl<sub>3</sub>) δ -102.95, -113.85. **HRMS** (ESI) for C<sub>14</sub>H<sub>15</sub>F<sub>3</sub>NaO<sub>4</sub>S [M + Na]<sup>+</sup>, calcd: 359.0535, found: 359.0523.

**ethyl 2,2-difluoro-2-(3-((4-(trifluoromethyl)phenyl)sulfonyl)cyclobutyl)acetate (4h)**

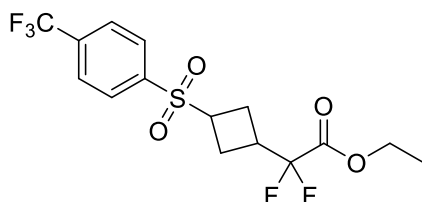

Prepared according to General Procedure B, compound **4h** was obtained as a light-yellow solid. (60 mg, 78 % yield, *dr* > 20:1). **<sup>1</sup>H NMR** (300 MHz, CDCl<sub>3</sub>) δ 8.06 – 7.99 (m, 2H), 7.88 – 7.81 (m,



2H), 4.32 (q,  $J = 7.1$  Hz, 2H), 3.80 – 3.66 (m, 1H), 3.01 – 2.67 (m, 3H), 2.35 – 2.22 (m, 2H), 1.34 (t,  $J = 7.2$  Hz, 3H).  $^{13}\text{C}$  NMR (75 MHz,  $\text{CDCl}_3$ )  $\delta$  163.3 (t,  $^2J_{\text{C-F}} = 33.0$  Hz), 141.2, 136.0 (d,  $^2J_{\text{C-F}} = 33.0$  Hz), 129.2, 126.7 (q,  $^3J_{\text{C-F}} = 3.8$  Hz), 125.0 (q,  $^1J_{\text{C-F}} = 271.5$  Hz), 114.1 (t,  $^1J_{\text{C-F}} = 249.8$  Hz), 63.3, 52.2, 32.6 (t,  $^2J_{\text{C-F}} = 26.3$  Hz), 22.9 (t,  $^3J_{\text{C-F}} = 5.3$  Hz), 14.1.  $^{19}\text{F}$  NMR (282 MHz,  $\text{CDCl}_3$ )  $\delta$  -63.23, -113.85. HRMS (ESI) for  $\text{C}_{15}\text{H}_{15}\text{F}_5\text{NaO}_4\text{S}$  [ $\text{M} + \text{Na}$ ] $^+$ , calcd: 409.0503, found: 409.0500.

**ethyl 2,2-difluoro-2-(3-((4-(trifluoromethoxy)phenyl)sulfonyl)cyclobutyl)acetate (4i)**

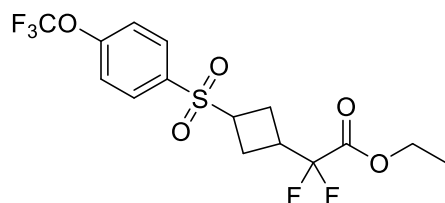

Prepared according to General Procedure B, compound **4i** was obtained as a beige solid. (66 mg, 82 % yield,  $dr > 20:1$ ).  $^1\text{H}$  NMR (300 MHz,  $\text{CDCl}_3$ )  $\delta$  7.97 – 7.90 (m, 2H), 7.43 – 7.36 (m, 2H), 4.32 (q,  $J = 7.1$  Hz, 2H), 3.78 – 3.64 (m, 1H), 3.00 – 2.65 (m, 3H), 2.35 – 2.21 (m, 2H), 1.34 (t,  $J = 7.2$  Hz, 3H).  $^{13}\text{C}$  NMR (75 MHz,  $\text{CDCl}_3$ )  $\delta$  163.3 (t,  $^2J_{\text{C-F}} = 33.0$  Hz), 153.4, 135.8, 130.8, 122.0 (d,  $^1J_{\text{C-F}} = 258.8$  Hz), 121.3, 114.2 (t,  $^1J_{\text{C-F}} = 249.8$  Hz), 63.3, 52.3, 32.6 (t,  $^2J_{\text{C-F}} = 26.3$  Hz), 23.0 (t,  $^3J_{\text{C-F}} = 5.3$  Hz), 14.1.  $^{19}\text{F}$  NMR (282 MHz,  $\text{CDCl}_3$ )  $\delta$  -57.67, -113.85. HRMS (ESI) for  $\text{C}_{15}\text{H}_{15}\text{F}_5\text{NaO}_5\text{S}$  [ $\text{M} + \text{Na}$ ] $^+$ , calcd: 425.0453, found: 425.0450.

**ethyl 2,2-difluoro-2-(3-((3-fluorophenyl)sulfonyl)cyclobutyl)acetate (4j)**

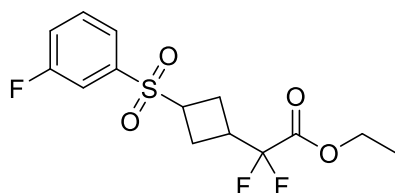

Prepared according to General Procedure B, compound **4j** was obtained as a light-yellow solid. (42 mg, 62 % yield,  $dr > 20:1$ ).  $^1\text{H}$  NMR (300 MHz,  $\text{CDCl}_3$ )  $\delta$  7.72 – 7.50 (m, 3H), 7.42 – 7.31 (m, 1H), 4.31 (q,  $J = 7.2$  Hz, 2H), 3.81 – 3.63 (m, 1H), 3.01 – 2.63 (m, 3H), 2.38 – 2.19 (m, 2H), 1.33 (t,  $J = 7.2$  Hz, 3H).  $^{13}\text{C}$  NMR (75 MHz,  $\text{CDCl}_3$ )  $\delta$  164.3 (d,  $^1J_{\text{C-F}} = 251.3$  Hz), 163.3 (t,  $^2J_{\text{C-F}} = 33.0$  Hz), 139.7 (d,  $^3J_{\text{C-F}} = 6.8$  Hz), 131.5 (d,  $^3J_{\text{C-F}} = 7.5$  Hz), 124.4, 121.6 (d,  $^2J_{\text{C-F}} = 21.0$  Hz), 116.0 (d,  $^2J_{\text{C-F}} = 24.8$  Hz), 114.2 (t,  $^1J_{\text{C-F}} = 249.8$  Hz), 63.3, 52.2, 32.6 (t,  $^2J_{\text{C-F}} = 26.3$  Hz), 23.0 (t,  $^3J_{\text{C-F}} = 5.3$  Hz), 14.1.  $^{19}\text{F}$  NMR (282 MHz,  $\text{CDCl}_3$ )  $\delta$  -108.77, -113.82. HRMS (ESI) for  $\text{C}_{14}\text{H}_{15}\text{F}_3\text{NaO}_4\text{S}$  [ $\text{M} + \text{Na}$ ] $^+$ , calcd: 359.0535, found: 359.0526.

**ethyl 2,2-difluoro-2-(3-((2-fluorophenyl)sulfonyl)cyclobutyl)acetate (4k)**

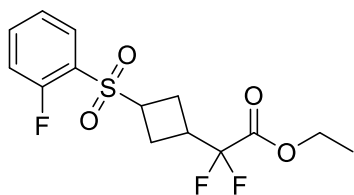

Prepared according to General Procedure B, compound **4k** was obtained as a yellow solid. (29 mg, 43 % yield, *dr* > 20:1). **<sup>1</sup>H NMR** (300 MHz, CDCl<sub>3</sub>) δ 7.96 – 7.88 (m, 1H), 7.69 – 7.59 (m, 1H), 7.37 – 7.29 (m, 1H), 7.26 – 7.18 (m, 1H), 4.30 (q, *J* = 7.2 Hz, 2H), 4.07 – 3.91 (m, 1H), 3.04 – 2.67 (m, 3H), 2.38 – 2.23 (m, 2H), 1.32 (t, *J* = 7.2 Hz, 3H). **<sup>13</sup>C NMR** (75 MHz, CDCl<sub>3</sub>) δ 163.3 (t, <sup>2</sup>*J*<sub>C-F</sub> = 33.0 Hz), 161.4 (d, <sup>1</sup>*J*<sub>C-F</sub> = 254.3 Hz), 136.6 (d, <sup>3</sup>*J*<sub>C-F</sub> = 8.3 Hz), 131.1, 125.7 (d, <sup>2</sup>*J*<sub>C-F</sub> = 15.8 Hz), 125.0 (d, <sup>3</sup>*J*<sub>C-F</sub> = 3.8 Hz), 117.5 (d, <sup>2</sup>*J*<sub>C-F</sub> = 21.0 Hz), 114.2 (t, <sup>1</sup>*J*<sub>C-F</sub> = 249.8 Hz), 63.2, 51.9, 32.6 (t, <sup>2</sup>*J*<sub>C-F</sub> = 26.3 Hz), 22.6 (t, <sup>3</sup>*J*<sub>C-F</sub> = 5.3 Hz), 14.0. **<sup>19</sup>F NMR** (282 MHz, CDCl<sub>3</sub>) δ -108.38, -113.79. **HRMS** (ESI) for C<sub>14</sub>H<sub>15</sub>F<sub>3</sub>NaO<sub>4</sub>S [M + Na]<sup>+</sup>, calcd: 359.0535, found: 359.0529.

**ethyl 2,2-difluoro-2-(3-(phenylsulfonyl)cyclobutyl)acetate (4l)**

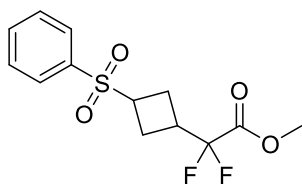

Prepared according to General Procedure B (*s*-butanol (0.1M) as solvent instead of EtOH), compound **4l** was obtained as a light-yellow solid. (34 mg, 56 % yield, *dr* > 20:1). **<sup>1</sup>H NMR** (300 MHz, CDCl<sub>3</sub>) δ 7.91 – 7.84 (m, 2H), 7.71 – 7.63 (m, 1H), 7.57 (ddt, *J* = 8.3, 6.6, 1.3 Hz, 2H), 3.87 (s, 3H), 3.79 – 3.64 (m, 1H), 2.98 – 2.63 (m, 3H), 2.32 – 2.19 (m, 2H). **<sup>13</sup>C NMR** (101 MHz, CDCl<sub>3</sub>) δ 163.9 (t, <sup>2</sup>*J*<sub>C-F</sub> = 33.3 Hz), 137.5, 134.1, 129.5, 128.5, 114.3 (t, <sup>1</sup>*J*<sub>C-F</sub> = 252.5 Hz), 53.6, 52.2, 32.5 (t, <sup>2</sup>*J*<sub>C-F</sub> = 27.3 Hz), 22.9 (t, <sup>3</sup>*J*<sub>C-F</sub> = 5.1 Hz). **<sup>19</sup>F NMR** (282 MHz, CDCl<sub>3</sub>) δ -113.48. **HRMS** (ESI) for C<sub>13</sub>H<sub>14</sub>F<sub>2</sub>NaO<sub>4</sub>S [M + Na]<sup>+</sup>, calcd: 327.0473, found: 327.0462.

**benzyl 2,2-difluoro-2-(3-(phenylsulfonyl)cyclobutyl)acetate (4m)**

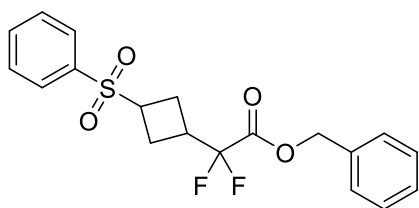

Prepared according to General Procedure B (*s*-butanol (0.1M) as solvent instead of EtOH), compound **4m** was obtained as a brown solid. (42 mg, 55 % yield, *dr* > 20:1). **<sup>1</sup>H NMR** (300 MHz,

CDCl<sub>3</sub>)  $\delta$  7.89 – 7.81 (m, 2H), 7.71 – 7.62 (m, 1H), 7.61 – 7.51 (m, 2H), 7.43 – 7.31 (m, 5H), 5.27 (s, 2H), 3.76 – 3.61 (m, 1H), 2.95 – 2.62 (m, 3H), 2.28 – 2.11 (m, 2H). <sup>13</sup>C NMR (101 MHz, CDCl<sub>3</sub>)  $\delta$  163.2 (t, <sup>2</sup>J<sub>C-F</sub> = 33.3 Hz), 137.3, 134.1, 129.5, 129.1, 128.9, 128.6, 128.5, 128.4, 114.3 (t, <sup>1</sup>J<sub>C-F</sub> = 252.5 Hz), 68.6, 52.2, 32.5 (t, <sup>2</sup>J<sub>C-F</sub> = 26.3 Hz), 22.9 (t, <sup>3</sup>J<sub>C-F</sub> = 5.1 Hz). <sup>19</sup>F NMR (282 MHz, CDCl<sub>3</sub>)  $\delta$  -113.67. HRMS (ESI) for C<sub>19</sub>H<sub>18</sub>F<sub>2</sub>NaO<sub>4</sub>S [M + Na]<sup>+</sup>, calcd: 403.0786, found: 403.0773.

#### 4-methoxybenzyl 2,2-difluoro-2-(3-(phenylsulfonyl)cyclobutyl)acetate (4n)

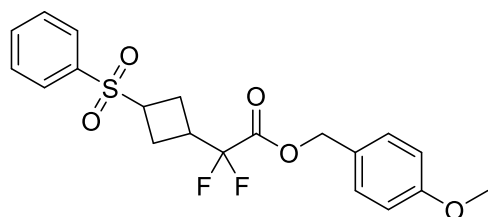

Prepared according to General Procedure B (*s*-butanol (0.1M) as solvent instead of EtOH), compound **4n** was obtained as a yellow solid. (41 mg, 50 % yield, *dr* > 20:1). <sup>1</sup>H NMR (300 MHz, CDCl<sub>3</sub>)  $\delta$  7.88 – 7.82 (m, 2H), 7.70 – 7.63 (m, 1H), 7.60 – 7.52 (m, 2H), 7.30 (d, *J* = 8.8 Hz, 2H), 6.89 (d, *J* = 8.8 Hz, 2H), 5.20 (s, 2H), 3.82 (s, 3H), 3.76 – 3.57 (m, 1H), 2.93 – 2.60 (m, 3H), 2.26 – 2.10 (m, 2H). <sup>13</sup>C NMR (75 MHz, CDCl<sub>3</sub>)  $\delta$  163.3 (t, <sup>2</sup>J<sub>C-F</sub> = 33.0 Hz), 160.2, 137.4, 134.1, 130.6, 129.5, 128.5, 126.3, 114.2, 114.0 (t, <sup>1</sup>J<sub>C-F</sub> = 249.8 Hz), 68.5, 55.4, 52.2, 32.5 (t, <sup>2</sup>J<sub>C-F</sub> = 26.3 Hz), 22.9 (t, <sup>3</sup>J<sub>C-F</sub> = 4.5 Hz). <sup>19</sup>F NMR (282 MHz, CDCl<sub>3</sub>)  $\delta$  -113.77. HRMS (ESI) for C<sub>20</sub>H<sub>20</sub>F<sub>2</sub>NaO<sub>5</sub>S [M + Na]<sup>+</sup>, calcd: 433.0892, found: 433.0872.

#### 2,2-difluoro-*N,N*-dimethyl-2-(3-(phenylsulfonyl)cyclobutyl)acetamide (4o)

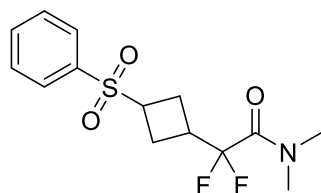

Prepared according to General Procedure B, compound **4o** was obtained as yellow oil. (38 mg, 59 % yield, *dr* = 13.7:1). <sup>1</sup>H NMR (300 MHz, CDCl<sub>3</sub>)  $\delta$  7.93 – 7.82 (m, 2H), 7.70 – 7.61 (m, 1H), 7.61 – 7.50 (m, 2H), 3.73 (p, *J* = 8.5 Hz, 1H), 3.25 – 3.00 (m, 4H), 2.96 (s, 3H), 2.74 – 2.60 (m, 2H), 2.39 – 2.24 (m, 2H). <sup>13</sup>C NMR (75 MHz, CDCl<sub>3</sub>)  $\delta$  162.5 (t, <sup>2</sup>J<sub>C-F</sub> = 29.3 Hz), 137.8, 133.9, 129.4, 128.4, 117.7 (t, <sup>1</sup>J<sub>C-F</sub> = 255.0 Hz), 52.6, 36.8 (t, <sup>3</sup>J<sub>C-F</sub> = 7.5 Hz), 36.6, 32.9 (t, <sup>2</sup>J<sub>C-F</sub> = 26.3 Hz), 23.4 (t, <sup>3</sup>J<sub>C-F</sub> = 5.3 Hz). <sup>19</sup>F NMR (282 MHz, CDCl<sub>3</sub>)  $\delta$  -108.55. HRMS (ESI) for C<sub>14</sub>H<sub>17</sub>F<sub>2</sub>NNaO<sub>3</sub>S [M + Na]<sup>+</sup>, calcd: 340.0789, found: 340.0781.

***N,N*-diethyl-2,2-difluoro-2-(3-(phenylsulfonyl)cyclobutyl)acetamide (4p)**

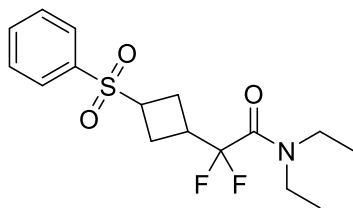

Prepared according to General Procedure B, compound **4p** was obtained as yellow oil. (40 mg, 58 % yield, *dr* > 20:1). **<sup>1</sup>H NMR** (300 MHz, CDCl<sub>3</sub>) δ 7.91 – 7.84 (m, 2H), 7.69 – 7.61 (m, 1H), 7.60 – 7.51 (m, 2H), 3.80 – 3.65 (m, 1H), 3.57 – 3.45 (m, 2H), 3.33 (q, *J* = 7.1 Hz, 2H), 3.22 – 3.00 (m, 1H), 2.67 (qd, *J* = 9.8, 2.6 Hz, 2H), 2.37 – 2.23 (m, 2H), 1.20 (t, *J* = 7.0 Hz, 3H), 1.12 (t, *J* = 7.1 Hz, 3H). **<sup>13</sup>C NMR** (75 MHz, CDCl<sub>3</sub>) δ 161.9 (t, <sup>2</sup>*J*<sub>C-F</sub> = 29.3 Hz), 137.8, 133.8, 129.4, 128.3, 117.8 (t, <sup>1</sup>*J*<sub>C-F</sub> = 255.0 Hz), 52.6, 41.6 (t, <sup>3</sup>*J*<sub>C-F</sub> = 6.0 Hz), 41.2, 33.1 (t, <sup>2</sup>*J*<sub>C-F</sub> = 26.3 Hz), 23.4 (t, <sup>3</sup>*J*<sub>C-F</sub> = 5.3 Hz), 14.2, 12.3. **<sup>19</sup>F NMR** (282 MHz, CDCl<sub>3</sub>) δ -108.58. **HRMS** (ESI) for C<sub>16</sub>H<sub>21</sub>F<sub>2</sub>NNaO<sub>3</sub>S [M + Na]<sup>+</sup>, calcd: 368.1102, found: 368.1095.

**1-(azetidin-1-yl)-2,2-difluoro-2-(3-(phenylsulfonyl)cyclobutyl)ethan-1-one (4q)**

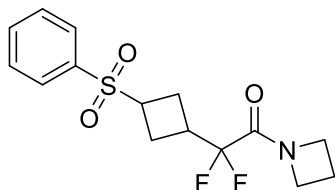

Prepared according to General Procedure B, compound **4q** was obtained as a light-yellow solid. (38 mg, 58 % yield, *dr* > 20:1). **<sup>1</sup>H NMR** (300 MHz, CDCl<sub>3</sub>) δ 7.91 – 7.84 (m, 2H), 7.69 – 7.62 (m, 1H), 7.61 – 7.51 (m, 2H), 4.45 (t, *J* = 7.7 Hz, 2H), 4.09 (t, *J* = 7.8 Hz, 2H), 3.78 – 3.63 (m, 1H), 3.16 – 2.90 (m, 1H), 2.74 – 2.58 (m, 2H), 2.44 – 2.19 (m, 4H). **<sup>13</sup>C NMR** (101 MHz, CDCl<sub>3</sub>) δ 162.1 (t, <sup>2</sup>*J*<sub>C-F</sub> = 30.3 Hz), 137.7, 133.9, 129.4, 128.3, 117.1 (t, <sup>1</sup>*J*<sub>C-F</sub> = 254.5 Hz), 52.4, 52.3, 48.9, 32.0 (t, <sup>2</sup>*J*<sub>C-F</sub> = 26.3 Hz), 22.9 (t, <sup>3</sup>*J*<sub>C-F</sub> = 5.1 Hz), 16.5. **<sup>19</sup>F NMR** (282 MHz, CDCl<sub>3</sub>) δ -111.86. **HRMS** (ESI) for C<sub>15</sub>H<sub>17</sub>F<sub>2</sub>NNaO<sub>3</sub>S [M + Na]<sup>+</sup>, calcd: 352.0789, found: 352.0775.

**2,2-difluoro-2-(3-(phenylsulfonyl)cyclobutyl)-1-(pyrrolidin-1-yl)ethan-1-one (4r)**

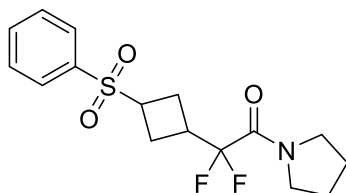

Prepared according to General Procedure B, compound **4r** was obtained as a light-yellow solid.

(38 mg, 55 % yield,  $dr > 20:1$ ).  $^1\text{H NMR}$  (300 MHz,  $\text{CDCl}_3$ )  $\delta$  7.91 – 7.84 (m, 2H), 7.69 – 7.61 (m, 1H), 7.60 – 7.51 (m, 2H), 3.79 – 3.65 (m, 3H), 3.47 (t,  $J = 7.0$  Hz, 2H), 3.23 – 2.99 (m, 1H), 2.75 – 2.60 (m, 2H), 2.37 – 2.24 (m, 2H), 2.01 – 1.79 (m, 4H).  $^{13}\text{C NMR}$  (101 MHz,  $\text{CDCl}_3$ )  $\delta$  161.3 (t,  $^2J_{\text{C-F}} = 30.3$  Hz), 137.8, 133.9, 129.4, 128.4, 117.2 (t,  $^1J_{\text{C-F}} = 256.5$  Hz), 52.6, 47.2, 46.3 (t,  $^3J_{\text{C-F}} = 6.1$  Hz), 32.5 (t,  $^2J_{\text{C-F}} = 26.3$  Hz), 26.5, 23.4, 23.3 (t,  $^3J_{\text{C-F}} = 6.1$  Hz).  $^{19}\text{F NMR}$  (282 MHz,  $\text{CDCl}_3$ )  $\delta$  -111.82. **HRMS** (ESI) for  $\text{C}_{16}\text{H}_{19}\text{F}_2\text{NNaO}_3\text{S}$  [ $\text{M} + \text{Na}$ ] $^+$ , calcd: 366.0946, found: 366.0936.

#### 2,2-difluoro-2-(3-(phenylsulfonyl)cyclobutyl)-1-(piperidin-1-yl)ethan-1-one (4s)

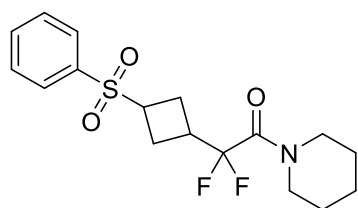

Prepared according to General Procedure B, compound **4s** was obtained as a light-yellow solid. (36 mg, 50 % yield,  $dr = 20:1$ ).  $^1\text{H NMR}$  (300 MHz,  $\text{CDCl}_3$ )  $\delta$  7.91 – 7.84 (m, 2H), 7.69 – 7.61 (m, 1H), 7.60 – 7.51 (m, 2H), 3.80 – 3.67 (m, 1H), 3.67 – 3.58 (m, 2H), 3.55 – 3.46 (m, 2H), 3.20 – 3.00 (m, 1H), 2.74 – 2.60 (m, 2H), 2.38 – 2.25 (m, 2H), 1.66 – 1.57 (m, 6H).  $^{13}\text{C NMR}$  (75 MHz,  $\text{CDCl}_3$ )  $\delta$  160.9 (t,  $^2J_{\text{C-F}} = 28.5$  Hz), 137.9, 133.9, 129.4, 128.4, 118.0 (t,  $^1J_{\text{C-F}} = 255.8$  Hz), 52.6, 46.7 (t,  $^3J_{\text{C-F}} = 6.8$  Hz), 44.2, 33.1 (t,  $^2J_{\text{C-F}} = 26.3$  Hz), 26.5, 25.7, 24.5, 23.4 (t,  $^3J_{\text{C-F}} = 6.0$  Hz).  $^{19}\text{F NMR}$  (282 MHz,  $\text{CDCl}_3$ )  $\delta$  -108.11. **HRMS** (ESI) for  $\text{C}_{17}\text{H}_{21}\text{F}_2\text{NNaO}_3\text{S}$  [ $\text{M} + \text{Na}$ ] $^+$ , calcd: 380.1102, found: 380.1089.

#### 2,2-difluoro-1-morpholino-2-(3-(phenylsulfonyl)cyclobutyl)ethan-1-one (4t)

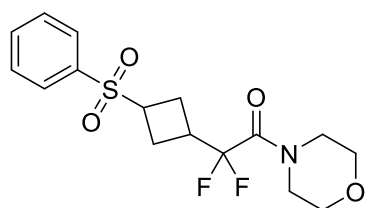

Prepared according to General Procedure B, compound **4t** was obtained as a white solid. (47 mg, 66 % yield,  $dr = 6:1$ ).  $^1\text{H NMR}$  (400 MHz,  $\text{CDCl}_3$ )  $\delta$  7.92 – 7.85 (m, 2H), 7.68 – 7.62 (m, 1H), 7.59 – 7.52 (m, 2H), 3.78 – 3.66 (m, 7H), 3.62 – 3.56 (m, 2H), 3.33 – 3.03 (m, 1H), 2.82 – 2.63 (m, 2H), 2.45 – 2.27 (m, 2H).  $^{13}\text{C NMR}$  (75 MHz,  $\text{CDCl}_3$ )  $\delta$  161.2 (t,  $^2J_{\text{C-F}} = 29.3$  Hz), 137.9, 133.9, 129.4, 128.4, 117.8 (t,  $^1J_{\text{C-F}} = 255.0$  Hz), 66.9, 66.7, 52.6, 46.4, 43.2, 32.8 (t,  $^2J_{\text{C-F}} = 26.3$  Hz), 23.3

(t,  $^3J_{C-F} = 5.3$  Hz).  $^{19}\text{F}$  NMR (282 MHz,  $\text{CDCl}_3$ )  $\delta$  -107.88, -108.83. HRMS (ESI) for  $\text{C}_{16}\text{H}_{19}\text{F}_2\text{NNaO}_4\text{S}$   $[\text{M} + \text{Na}]^+$ , calcd: 382.0895, found: 382.0882.

**2,2-difluoro-2-(3-(phenylsulfonyl)cyclobutyl)-1-thiomorpholinoethan-1-one (4u)**

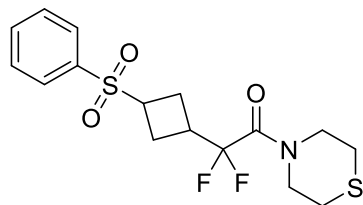

Prepared according to General Procedure B, compound **4u** was obtained as a beige solid. (43 mg, 57 % yield,  $dr > 20:1$ ).  $^1\text{H}$  NMR (300 MHz,  $\text{CDCl}_3$ )  $\delta$  7.91 – 7.84 (m, 2H), 7.69 – 7.62 (m, 1H), 7.61 – 7.51 (m, 2H), 4.01 – 3.91 (m, 2H), 3.89 – 3.80 (m, 2H), 3.80 – 3.66 (m, 1H), 3.22 – 2.99 (m, 1H), 2.76 – 2.55 (m, 6H), 2.38 – 2.23 (m, 2H).  $^{13}\text{C}$  NMR (101 MHz,  $\text{CDCl}_3$ )  $\delta$  161.2 (t,  $^2J_{C-F} = 29.3$  Hz), 137.9, 133.9, 129.4, 128.4, 117.9 (t,  $^1J_{C-F} = 257.6$  Hz), 52.5, 48.6 (t,  $^3J_{C-F} = 5.1$  Hz), 45.8, 33.0 (t,  $^2J_{C-F} = 26.3$  Hz), 28.2, 27.4, 23.4 (t,  $^3J_{C-F} = 6.1$  Hz).  $^{19}\text{F}$  NMR (282 MHz,  $\text{CDCl}_3$ )  $\delta$  -108.02. HRMS (ESI) for  $\text{C}_{16}\text{H}_{19}\text{F}_2\text{NNaO}_3\text{S}_2$   $[\text{M} + \text{Na}]^+$ , calcd: 398.0667, found: 398.0656.

**tert-butyl 4-(2,2-difluoro-2-(3-(phenylsulfonyl)cyclobutyl)acetyl)piperazine-1-carboxylate (4v)**

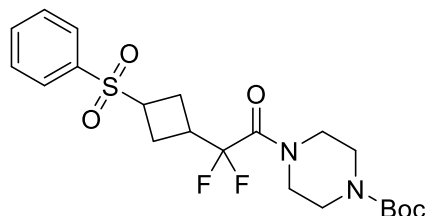

Prepared according to General Procedure B, compound **4v** was obtained as a light-yellow solid. (46 mg, 50 % yield,  $dr > 20:1$ ).  $^1\text{H}$  NMR (300 MHz,  $\text{CDCl}_3$ )  $\delta$  7.90 – 7.83 (m, 2H), 7.68 – 7.62 (m, 1H), 7.60 – 7.51 (m, 2H), 3.81 – 3.64 (m, 3H), 3.59 – 3.41 (m, 6H), 3.21 – 2.99 (m, 1H), 2.74 – 2.61 (m, 2H), 2.40 – 2.25 (m, 2H), 1.47 (s, 9H).  $^{13}\text{C}$  NMR (75 MHz,  $\text{CDCl}_3$ )  $\delta$  161.3 (t,  $^2J_{C-F} = 29.3$  Hz), 154.5, 137.8, 133.9, 129.4, 128.4, 117.8 (t,  $^1J_{C-F} = 255.0$  Hz), 80.6, 52.6, 45.6, 42.8, 32.9 (t,  $^2J_{C-F} = 26.3$  Hz), 28.5, 23.3 (t,  $^3J_{C-F} = 5.3$  Hz).  $^{19}\text{F}$  NMR (282 MHz,  $\text{CDCl}_3$ )  $\delta$  -107.71. HRMS (ESI) for  $\text{C}_{21}\text{H}_{28}\text{F}_2\text{N}_2\text{NaO}_5\text{S}$   $[\text{M} + \text{Na}]^+$ , calcd: 481.1579, found: 481.1568.

**2,2-difluoro-1-(4-phenylpiperazin-1-yl)-2-(3-(phenylsulfonyl)cyclobutyl)ethan-1-one (4w)**

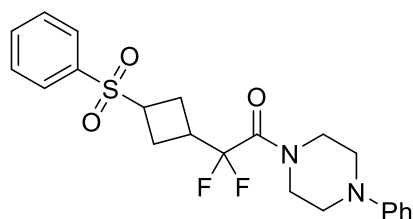

Prepared according to General Procedure B, compound **4w** was obtained as a beige solid. (56 mg, 65 % yield, *dr* > 20:1). **<sup>1</sup>H NMR** (300 MHz, CDCl<sub>3</sub>) δ 7.94 – 7.83 (m, 2H), 7.70 – 7.50 (m, 3H), 7.35 – 7.27 (m, 2H), 7.04 – 6.88 (m, 3H), 3.95 – 3.66 (m, 5H), 3.29 – 3.03 (m, 5H), 2.77 – 2.62 (m, 2H), 2.41 – 2.25 (m, 2H). **<sup>13</sup>C NMR** (101 MHz, CDCl<sub>3</sub>) δ 161.1 (t, <sup>2</sup>*J*<sub>C-F</sub> = 29.3 Hz), 150.8, 137.9, 133.9, 129.4, 128.4, 120.9, 117.9 (t, <sup>1</sup>*J*<sub>C-F</sub> = 259.6 Hz), 116.9, 52.6, 49.9, 49.5, 45.6, 42.9, 32.9 (t, <sup>2</sup>*J*<sub>C-F</sub> = 27.3 Hz), 23.4. **<sup>19</sup>F NMR** (282 MHz, CDCl<sub>3</sub>) δ -107.62. **HRMS** (ESI) for C<sub>22</sub>H<sub>24</sub>F<sub>2</sub>N<sub>2</sub>NaO<sub>3</sub>S [M + Na]<sup>+</sup>, calcd: 457.1368, found: 457.1359.

#### 2,2-difluoro-*N*-phenyl-2-(3-(phenylsulfonyl)cyclobutyl)acetamide (**4x**)

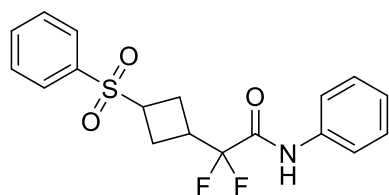

Prepared according to General Procedure B, compound **4x** was obtained as a yellow solid. (57 mg, 78 % yield, *dr* = 1.8:1). Mixture of isomer 1 and isomer 2: **<sup>1</sup>H NMR** (300 MHz, CDCl<sub>3</sub>) δ 8.04 – 7.85 (m, 3H), 7.72 – 7.63 (m, 1H), 7.62 – 7.49 (m, 4H), 7.41 – 7.33 (m, 2H), 7.24 – 7.16 (m, 1H), 3.87 – 3.68 (m, 1H), 3.39 – 3.01 (m, 1H), 2.85 – 2.69 (m, 2H), 2.64 – 2.25 (m, 2H). Isomer 1: **<sup>13</sup>C NMR** (101 MHz, Acetone-*d*<sub>6</sub>) δ 162.3 (t, <sup>2</sup>*J*<sub>C-F</sub> = 29.3 Hz), 138.9, 138.2, 134.8, 130.3, 129.7, 129.2, 129.0, 125.9, 121.4, 118.1 (t, <sup>1</sup>*J*<sub>C-F</sub> = 254.5 Hz), 54.5, 34.8 (t, <sup>2</sup>*J*<sub>C-F</sub> = 26.3 Hz), 22.8 (t, <sup>3</sup>*J*<sub>C-F</sub> = 5.1 Hz). **<sup>19</sup>F NMR** (282 MHz, CDCl<sub>3</sub>) δ -114.17. **HRMS** (ESI) for C<sub>18</sub>H<sub>17</sub>F<sub>2</sub>NNaO<sub>3</sub>S [M + Na]<sup>+</sup>, calcd: 388.0789, found: 388.0779. Isomer 2: **<sup>13</sup>C NMR** (101 MHz, Acetone-*d*<sub>6</sub>) δ 162.3 (t, <sup>2</sup>*J*<sub>C-F</sub> = 29.3 Hz), 139.3, 138.2, 134.7, 130.3, 129.7, 129.2, 129.0, 125.9, 121.5, 117.1 (t, <sup>1</sup>*J*<sub>C-F</sub> = 254.5 Hz), 52.5, 32.9 (t, <sup>2</sup>*J*<sub>C-F</sub> = 26.3 Hz), 23.4 (t, <sup>3</sup>*J*<sub>C-F</sub> = 5.1 Hz). **<sup>19</sup>F NMR** (282 MHz, CDCl<sub>3</sub>) δ -113.49. **HRMS** (ESI) for C<sub>18</sub>H<sub>17</sub>F<sub>2</sub>NNaO<sub>3</sub>S [M + Na]<sup>+</sup>, calcd: 388.0789, found: 388.0779.

#### 2,2-difluoro-1-(1-methyl-1*H*-indol-3-yl)-2-(3-(phenylsulfonyl)cyclobutyl)ethan-1-one (**4y**)

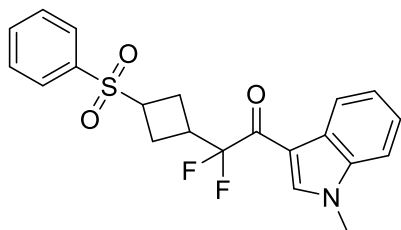

Prepared according to General Procedure B, compound **4y** was obtained as a light-yellow solid. (45 mg, 56 % yield, *dr* = 2.9:1). Mixture of isomer 1 and isomer 2: **<sup>1</sup>H NMR** (300 MHz, CDCl<sub>3</sub>) δ 8.40 – 8.32 (m, 1H), 8.08 – 7.96 (m, 1H), 7.92 – 7.81 (m, 2H), 7.70 – 7.62 (m, 1H), 7.61 – 7.52 (m, 2H), 7.44 – 7.30 (m, 3H), 3.97 – 3.69 (m, 4H), 3.41 – 3.07 (m, 1H), 2.86 – 2.66 (m, 2H), 2.60 – 2.26 (m, 2H). Isomer 1: **<sup>13</sup>C NMR** (101 MHz, CDCl<sub>3</sub>) δ 183.4 (t, <sup>2</sup>*J*<sub>C-F</sub> = 30.3 Hz), 138.4 (t, <sup>3</sup>*J*<sub>C-F</sub> = 9.1 Hz), 137.6, 137.1, 134.0, 129.4, 128.4, 127.2, 124.3, 123.6, 122.6, 119.2 (t, <sup>1</sup>*J*<sub>C-F</sub> = 254.5 Hz), 110.5, 110.0, 54.5, 34.0 (t, <sup>2</sup>*J*<sub>C-F</sub> = 25.3 Hz), 33.9, 22.6 (t, <sup>3</sup>*J*<sub>C-F</sub> = 5.1 Hz). **<sup>19</sup>F NMR** (282 MHz, CDCl<sub>3</sub>) δ -108.25. **HRMS** (ESI) for C<sub>21</sub>H<sub>19</sub>F<sub>2</sub>NNaO<sub>3</sub>S [M + Na]<sup>+</sup>, calcd: 426.0946, found: 426.0932. Isomer 2: **<sup>13</sup>C NMR** (101 MHz, CDCl<sub>3</sub>) δ 183.6 (t, <sup>2</sup>*J*<sub>C-F</sub> = 30.3 Hz), 138.8 (t, <sup>3</sup>*J*<sub>C-F</sub> = 9.1 Hz), 137.7, 137.1, 133.9, 129.4, 128.4, 127.3, 124.2, 123.6, 122.5, 118.1 (t, <sup>1</sup>*J*<sub>C-F</sub> = 255.5 Hz), 110.6, 110.1, 52.7, 33.9, 32.1 (t, <sup>2</sup>*J*<sub>C-F</sub> = 26.3 Hz), 23.2 (t, <sup>3</sup>*J*<sub>C-F</sub> = 5.1 Hz). **<sup>19</sup>F NMR** (282 MHz, CDCl<sub>3</sub>) δ -109.61. **HRMS** (ESI) for C<sub>21</sub>H<sub>19</sub>F<sub>2</sub>NNaO<sub>3</sub>S [M + Na]<sup>+</sup>, calcd: 426.0946, found: 426.0932.

#### 2,2-difluoro-1-phenyl-2-(3-(phenylsulfonyl)cyclobutyl)ethan-1-one (**4z**)

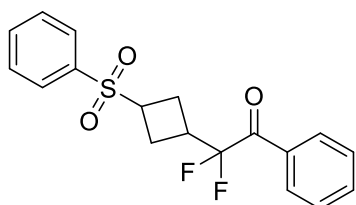

Prepared according to General Procedure B, compound **4z** was obtained as light-yellow oil (34 mg, 49 % yield, *dr* > 20:1). **<sup>1</sup>H NMR** (300 MHz, CDCl<sub>3</sub>) δ 8.12 – 8.04 (m, 2H), 7.92 – 7.84 (m, 2H), 7.69 – 7.45 (m, 6H), 3.85 – 3.70 (m, 1H), 3.23 – 2.99 (m, 1H), 2.81 – 2.66 (m, 2H), 2.41 – 2.27 (m, 2H). **<sup>13</sup>C NMR** (75 MHz, CDCl<sub>3</sub>) δ 188.7 (t, <sup>2</sup>*J*<sub>C-F</sub> = 31.5 Hz), 137.7, 134.8, 134.0, 131.7 (t, <sup>3</sup>*J*<sub>C-F</sub> = 3.0 Hz), 130.3 (t, <sup>4</sup>*J*<sub>C-F</sub> = 3.0 Hz), 129.5, 128.9, 128.5, 117.8 (t, <sup>1</sup>*J*<sub>C-F</sub> = 252.8 Hz), 52.8, 31.9 (t, <sup>2</sup>*J*<sub>C-F</sub> = 26.3 Hz), 23.3 (t, <sup>3</sup>*J*<sub>C-F</sub> = 6.0 Hz). **<sup>19</sup>F NMR** (282 MHz, CDCl<sub>3</sub>) δ -107.69. **HRMS** (ESI) for C<sub>18</sub>H<sub>16</sub>F<sub>2</sub>NaO<sub>3</sub>S [M + Na]<sup>+</sup>, calcd: 373.0680, found: 373.0666.

#### 2-(difluoro(3-(phenylsulfonyl)cyclobutyl)methyl)benzo[*d*]oxazole (**4aa**)



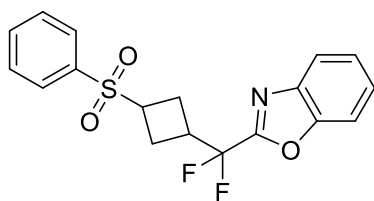

Prepared according to General Procedure B, compound **4aa** was obtained as a light-yellow solid. (49 mg, 67 % yield, *dr* > 20:1). **<sup>1</sup>H NMR** (300 MHz, CDCl<sub>3</sub>) δ 7.92 – 7.85 (m, 2H), 7.79 – 7.74 (m, 1H), 7.70 – 7.52 (m, 4H), 7.50 – 7.37 (m, 2H), 3.87 – 3.72 (m, 1H), 3.42 – 3.19 (m, 1H), 2.91 – 2.76 (m, 2H), 2.49 – 2.33 (m, 2H). **<sup>13</sup>C NMR** (101 MHz, CDCl<sub>3</sub>) δ 156.8 (t, <sup>2</sup>*J*<sub>C-F</sub> = 33.3 Hz), 150.7, 139.9, 137.5, 134.1, 129.5, 128.5, 127.2, 125.5, 121.4, 115.0 (t, <sup>1</sup>*J*<sub>C-F</sub> = 242.4 Hz), 111.6, 52.3, 33.7 (t, <sup>2</sup>*J*<sub>C-F</sub> = 26.3 Hz), 23.3 (t, <sup>3</sup>*J*<sub>C-F</sub> = 5.1 Hz). **<sup>19</sup>F NMR** (282 MHz, CDCl<sub>3</sub>) δ -106.46. **HRMS** (ESI) for C<sub>18</sub>H<sub>15</sub>F<sub>2</sub>NNaO<sub>3</sub>S [M + Na]<sup>+</sup>, calcd: 386.0633, found: 386.0620.

#### 2-(difluoro(3-(phenylsulfonyl)cyclobutyl)methyl)benzo[d]thiazole (**4ab**)

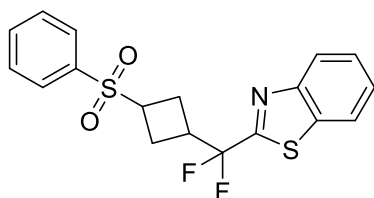

Prepared according to General Procedure B, compound **4ab** was obtained as a yellow solid. (58 mg, 76 % yield, *dr* > 20:1). **<sup>1</sup>H NMR** (300 MHz, CDCl<sub>3</sub>) δ 8.09 – 8.04 (m, 1H), 7.96 (d, *J* = 7.4 Hz, 1H), 7.89 (d, *J* = 7.0 Hz, 2H), 7.69 – 7.62 (m, 1H), 7.61 – 7.45 (m, 4H), 3.84 – 3.69 (m, 1H), 3.51 – 3.29 (m, 1H), 2.91 – 2.76 (m, 2H), 2.44 – 2.29 (m, 2H). **<sup>13</sup>C NMR** (75 MHz, CDCl<sub>3</sub>) δ 162.9 (t, <sup>2</sup>*J*<sub>C-F</sub> = 34.5 Hz), 152.6, 137.6, 135.1, 134.0, 129.5, 128.5, 126.9, 126.8, 124.4, 122.2, 118.1 (t, <sup>1</sup>*J*<sub>C-F</sub> = 240.0 Hz), 52.4, 34.3 (t, <sup>2</sup>*J*<sub>C-F</sub> = 27.0 Hz), 23.5 (t, <sup>3</sup>*J*<sub>C-F</sub> = 5.3 Hz). **<sup>19</sup>F NMR** (282 MHz, CDCl<sub>3</sub>) δ -98.56. **HRMS** (ESI) for C<sub>18</sub>H<sub>15</sub>F<sub>2</sub>NNaO<sub>2</sub>S<sub>2</sub> [M + Na]<sup>+</sup>, calcd: 402.0405, found: 402.0392.

#### diethyl (difluoro(3-(phenylsulfonyl)cyclobutyl)methyl)phosphonate (**4ac**)

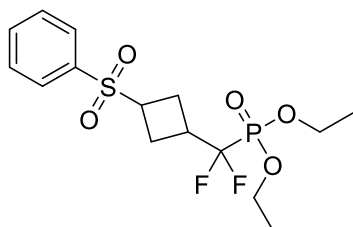

Prepared according to General Procedure B, compound **4ac** was obtained as light-yellow oil (44 mg, 58 % yield, *dr* > 20:1). **<sup>1</sup>H NMR** (300 MHz, CDCl<sub>3</sub>) δ 7.87 – 7.79 (m, 2H), 7.68 – 7.59 (m, 1H), 7.58 – 7.49 (m, 2H), 4.29 – 4.16 (m, 4H), 3.76 – 3.61 (m, 1H), 2.98 – 2.76 (m, 1H), 2.75 – 2.60

(m, 2H), 2.30 – 2.15 (m, 2H), 1.33 (t,  $J = 7.1$  Hz, 6H).  $^{13}\text{C}$  NMR (101 MHz,  $\text{CDCl}_3$ )  $\delta$  137.6, 134.0, 129.4, 128.4, 119.6 (td,  $^1J_{\text{C-F}} = 260.6, 214.1$  Hz), 64.7, 64.6, 52.4, 32.1 (td,  $^2J_{\text{C-F}} = 23.2, 15.2$  Hz), 23.0 (q,  $^3J_{\text{C-F}} = 4.3$  Hz), 16.5, 16.4.  $^{19}\text{F}$  NMR (282 MHz,  $\text{CDCl}_3$ )  $\delta$  -119.97, -120.36. HRMS (ESI) for  $\text{C}_{15}\text{H}_{21}\text{F}_2\text{NaO}_5\text{PS}$  [ $\text{M} + \text{Na}$ ] $^+$ , calcd: 405.0708, found: 405.0695.

**ethyl 2-fluoro-2-(3-(phenylsulfonyl)cyclobutyl)acetate (4ad)**

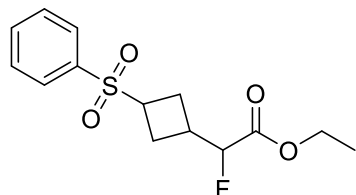

Prepared according to General Procedure B, compound **4ad** was obtained as light-yellow oil. (50 mg, 83 % yield,  $dr = 1.8:1$ ). Isomer 1:  $^1\text{H}$  NMR (300 MHz,  $\text{CDCl}_3$ )  $\delta$  7.91 – 7.84 (m, 2H), 7.70 – 7.62 (m, 1H), 7.61 – 7.52 (m, 2H), 4.84 (dd,  $J = 49.0, 6.1$  Hz, 1H), 4.24 (q,  $J = 7.1$  Hz, 2H), 3.77 – 3.65 (m, 1H), 2.84 – 2.53 (m, 3H), 2.37 – 2.16 (m, 2H), 1.29 (t,  $J = 7.1$  Hz, 3H).  $^{13}\text{C}$  NMR (75 MHz,  $\text{CDCl}_3$ )  $\delta$  168.5 (d,  $^2J_{\text{C-F}} = 23.3$  Hz), 137.7, 134.0, 129.5, 128.4, 90.5 (d,  $^1J_{\text{C-F}} = 185.3$  Hz), 61.8, 53.0, 31.5 (d,  $^2J_{\text{C-F}} = 23.3$  Hz), 24.6 (d,  $^3J_{\text{C-F}} = 4.5$  Hz), 24.5 (d,  $^3J_{\text{C-F}} = 7.5$  Hz), 14.3.  $^{19}\text{F}$  NMR (282 MHz,  $\text{CDCl}_3$ )  $\delta$  -197.46. HRMS (ESI) for  $\text{C}_{14}\text{H}_{17}\text{FNaO}_4\text{S}$  [ $\text{M} + \text{Na}$ ] $^+$ , calcd: 323.0724, found: 323.0717. Isomer 2:  $^1\text{H}$  NMR (300 MHz,  $\text{CDCl}_3$ )  $\delta$  7.91 – 7.84 (m, 2H), 7.70 – 7.62 (m, 1H), 7.61 – 7.52 (m, 2H), 4.86 (dd,  $J = 49.4, 3.9$  Hz, 1H), 4.23 (q,  $J = 6.9$  Hz, 2H), 3.82 – 3.68 (m, 1H), 3.17 – 2.93 (m, 1H), 2.82 – 2.69 (m, 1H), 2.66 – 2.53 (m, 1H), 2.48 – 2.32 (m, 2H), 1.28 (t,  $J = 7.2$  Hz, 3H).  $^{13}\text{C}$  NMR (75 MHz,  $\text{CDCl}_3$ )  $\delta$  168.5 (d,  $^2J_{\text{C-F}} = 24.0$  Hz), 137.8, 134.0, 129.5, 128.4, 90.5 (d,  $^1J_{\text{C-F}} = 184.5$  Hz), 61.9, 54.3, 32.9 (d,  $^2J_{\text{C-F}} = 21.8$  Hz), 24.0 (d,  $^3J_{\text{C-F}} = 4.5$  Hz), 22.9 (d,  $^3J_{\text{C-F}} = 4.5$  Hz), 14.3.  $^{19}\text{F}$  NMR (282 MHz,  $\text{CDCl}_3$ )  $\delta$  -202.80. HRMS (ESI) for  $\text{C}_{14}\text{H}_{17}\text{FNaO}_4\text{S}$  [ $\text{M} + \text{Na}$ ] $^+$ , calcd: 323.0724, found: 323.0717.

**ethyl 2-(3-(phenylsulfonyl)cyclobutyl)acetate (4ae)**

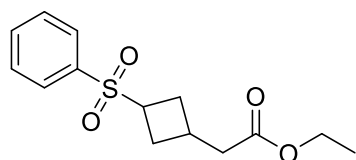

Prepared according to General Procedure B, compound **4ae** was obtained as yellow oil. (23 mg, 41 % yield,  $dr = 1.5:1$ ). Mixture of isomer 1 and isomer 2:  $^1\text{H}$  NMR (300 MHz,  $\text{CDCl}_3$ )  $\delta$  7.90 – 7.81 (m, 2H), 7.67 – 7.59 (m, 1H), 7.58 – 7.49 (m, 2H), 4.08 (qd,  $J = 7.2, 2.0$  Hz, 2H), 3.83 – 3.62

(m, 1H), 2.91 – 2.52 (m, 2H), 2.51 – 1.95 (m, 5H), 1.21 (td,  $J = 7.2, 3.7$  Hz, 3H). Isomer 1:  $^{13}\text{C}$  NMR (75 MHz,  $\text{CDCl}_3$ )  $\delta$  171.8, 138.0, 133.8, 129.4, 128.4, 60.6, 54.7, 40.0, 27.8, 27.3, 14.3. HRMS (ESI) for  $\text{C}_{14}\text{H}_{18}\text{NaO}_4\text{S}$   $[\text{M} + \text{Na}]^+$ , calcd: 305.0818, found: 305.0806. Isomer 2:  $^{13}\text{C}$  NMR (75 MHz,  $\text{CDCl}_3$ )  $\delta$  171.9, 138.2, 133.8, 129.4, 128.3, 60.6, 53.8, 40.3, 28.8, 26.2, 14.3. HRMS (ESI) for  $\text{C}_{14}\text{H}_{18}\text{NaO}_4\text{S}$   $[\text{M} + \text{Na}]^+$ , calcd: 305.0818, found: 305.0806.

### 2-(3-bromo-3-(phenylsulfonyl)cyclobutyl)-2,2-difluoroacetamide (5a)

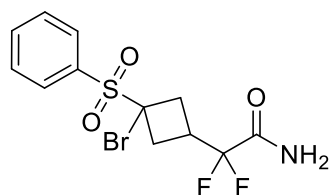

White solid. (58 mg, 78 % yield,  $dr = 3:1$ ) Mixture of isomer 1 and isomer 2:  $^1\text{H}$  NMR (300 MHz,  $\text{CDCl}_3$ )  $\delta$  8.07 – 7.93 (m, 2H), 7.77 – 7.68 (m, 1H), 7.64 – 7.55 (m, 2H), 6.31 (s, 1H), 5.75 (s, 1H), 3.58 – 3.31 (m, 3H), 3.09 – 2.42 (m, 2H). Isomer 1:  $^{13}\text{C}$  NMR (75 MHz,  $\text{CDCl}_3$ )  $\delta$  165.45 (t,  $^2J_{\text{C-F}} = 30.0$  Hz), 134.94, 133.51, 131.25, 129.10, 115.13 (t,  $^1J_{\text{C-F}} = 252.8$  Hz), 65.59, 35.82 (t,  $^2J_{\text{C-F}} = 5.3$  Hz), 33.98 (t,  $^3J_{\text{C-F}} = 26.3$  Hz).  $^{19}\text{F}$  NMR (282 MHz,  $\text{CDCl}_3$ )  $\delta$  -114.16. HRMS (ESI) for  $\text{C}_{12}\text{H}_{12}\text{BrF}_2\text{NNaO}_3\text{S}$   $[\text{M} + \text{Na}]^+$ , calcd: 389.9582, found: 389.9571. Isomer 2:  $^{13}\text{C}$  NMR (75 MHz,  $\text{CDCl}_3$ )  $\delta$  165.38 (t,  $^2J_{\text{C-F}} = 30.0$  Hz) 134.84, 133.93, 130.61, 129.22, 115.57 (t,  $^1J_{\text{C-F}} = 252.8$  Hz), 67.68, 34.66 (t,  $^2J_{\text{C-F}} = 5.3$  Hz), 31.27 (t,  $^3J_{\text{C-F}} = 26.3$  Hz).  $^{19}\text{F}$  NMR (282 MHz,  $\text{CDCl}_3$ )  $\delta$  -113.47. HRMS (ESI) for  $\text{C}_{12}\text{H}_{12}\text{BrF}_2\text{NNaO}_3\text{S}$   $[\text{M} + \text{Na}]^+$ , calcd: 389.9582, found: 389.9571.

### 2,2-difluoro-2-(3-(phenylsulfonyl)cyclobutyl)acetic acid (5b)

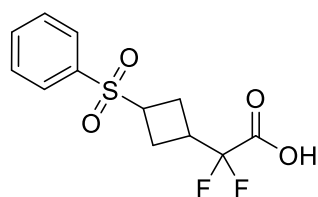

White solid. (38 mg, 66 % yield,  $dr > 20:1$ )  $^1\text{H}$  NMR (300 MHz,  $\text{CDCl}_3$ )  $\delta$  7.91 – 7.83 (m, 2H), 7.72 – 7.64 (m, 1H), 7.62 – 7.53 (m, 2H), 3.82 – 3.65 (m, 1H), 3.02 – 2.64 (m, 3H), 2.38 – 2.20 (m, 2H).  $^{13}\text{C}$  NMR (101 MHz,  $\text{Acetone-}d_6$ )  $\delta$  165.3, 139.2, 134.7, 130.32, 129.0, 115.8 (t,  $^1J_{\text{C-F}} = 249.5$  Hz), 52.4, 33.0 (t,  $^2J_{\text{C-F}} = 26.3$  Hz), 23.4 (t,  $^3J_{\text{C-F}} = 5.1$  Hz).  $^{19}\text{F}$  NMR (282 MHz,  $\text{CDCl}_3$ )  $\delta$  -114.20. HRMS (ESI) for  $\text{C}_{12}\text{H}_{12}\text{F}_2\text{NaO}_4\text{S}$   $[\text{M} + \text{Na}]^+$ , calcd: 313.0316, found: 313.0320.

### (1*R*,2*S*,5*R*)-2-isopropyl-5-methylcyclohexyl 2-(3-bromo-3-(phenylsulfonyl)cyclobutyl)-2,2-difluoroacetate (5c)

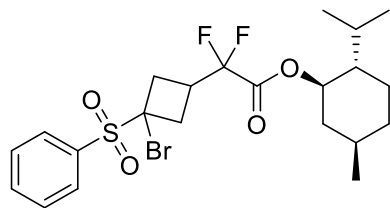

Prepared according to General Procedure A, compound **5c** was obtained as colorless oil (56 mg, 55 % yield, *dr* = 2.4:1). Mixture of isomer 1 and isomer 2: **<sup>1</sup>H NMR** (300 MHz, CDCl<sub>3</sub>) δ 8.06 – 7.92 (m, 2H), 7.77 – 7.67 (m, 1H), 7.64 – 7.55 (m, 2H), 4.87 – 4.73 (m, 1H), 3.55 – 3.24 (m, 3H), 3.04 – 2.37 (m, 2H), 2.04 – 1.93 (m, 1H), 1.85 – 1.65 (m, 3H), 1.53 – 1.42 (m, 2H), 1.15 – 1.00 (m, 2H), 0.95 – 0.88 (m, 7H), 0.79 – 0.71 (m, 3H). Isomer 1: **<sup>13</sup>C NMR** (75 MHz, CDCl<sub>3</sub>) δ 162.7 (t, <sup>2</sup>*J*<sub>C-F</sub> = 32.3 Hz), 134.9, 133.6, 131.3, 129.1, 113.8 (t, <sup>1</sup>*J*<sub>C-F</sub> = 249.8 Hz), 78.0, 65.4, 46.8, 41.7, 35.7 (t, <sup>3</sup>*J*<sub>C-F</sub> = 5.3 Hz), 34.3 (t, <sup>2</sup>*J*<sub>C-F</sub> = 26.3 Hz), 34.0, 31.5, 26.3, 23.4, 22.0, 20.8, 16.2. **<sup>19</sup>F NMR** (282 MHz, CDCl<sub>3</sub>) δ -114.53 (d, *J* = 16.9 Hz). **HRMS** (ESI) for C<sub>22</sub>H<sub>29</sub>BrF<sub>2</sub>NaO<sub>4</sub>S [M + Na]<sup>+</sup>, calcd: 529.0830, found: 529.0825. Isomer 2: **<sup>13</sup>C NMR** (75 MHz, CDCl<sub>3</sub>) δ 162.8 (t, <sup>2</sup>*J*<sub>C-F</sub> = 32.3 Hz), 134.8, 134.0, 130.6, 129.2, 114.1 (t, <sup>1</sup>*J*<sub>C-F</sub> = 250.5 Hz), 78.1, 67.8, 46.8, 40.4, 34.7 (t, <sup>3</sup>*J*<sub>C-F</sub> = 5.3 Hz), 34.0, 31.9 (t, <sup>2</sup>*J*<sub>C-F</sub> = 26.3 Hz), 31.5, 26.3, 23.4, 22.0, 20.8, 16.2. **<sup>19</sup>F NMR** (282 MHz, CDCl<sub>3</sub>) δ -113.84 (d, *J* = 19.7 Hz). **HRMS** (ESI) for C<sub>22</sub>H<sub>29</sub>BrF<sub>2</sub>NaO<sub>4</sub>S [M + Na]<sup>+</sup>, calcd: 529.0830, found: 529.0825.

**(1S,2S,4R)-1,3,3-trimethylbicyclo[2.2.1]heptan-2-yl 2-(3-bromo-3-(phenylsulfonyl)cyclobutyl)-2,2-difluoroacetate (5d)**

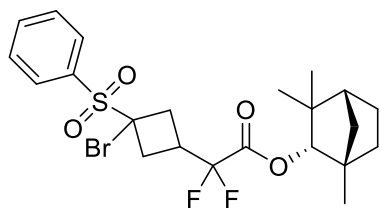

Prepared according to General Procedure A, compound **5d** was obtained as colorless oil (51 mg, 50 % yield, *dr* = 2.7:1). Mixture of isomer 1 and isomer 2: **<sup>1</sup>H NMR** (300 MHz, CDCl<sub>3</sub>) δ 8.01 (dd, *J* = 18.9, 7.1 Hz, 2H), 7.73 (t, *J* = 7.5 Hz, 1H), 7.60 (t, *J* = 7.6 Hz, 2H), 4.46 (d, *J* = 2.0 Hz, 1H), 3.56 – 3.26 (m, 3H), 3.07 – 2.41 (m, 2H), 1.79 – 1.58 (m, 4H), 1.34 – 1.21 (m, 3H), 1.12 (s, 3H), 1.05 (s, 3H), 0.79 (s, 3H). Isomer 1: **<sup>13</sup>C NMR** (75 MHz, CDCl<sub>3</sub>) δ 163.6 (t, <sup>2</sup>*J*<sub>C-F</sub> = 32.3 Hz), 135.0, 133.5, 131.3, 129.1, 114.2 (t, <sup>1</sup>*J*<sub>C-F</sub> = 249.8 Hz), 89.7, 65.4, 48.5, 48.3, 41.3, 39.7, 35.8, 34.3 (t, <sup>2</sup>*J*<sub>C-F</sub>

$F = 25.5$  Hz), 29.7, 26.6, 25.8, 20.1, 19.4.  **$^{19}\text{F}$  NMR** (282 MHz,  $\text{CDCl}_3$ )  $\delta$  -114.20 (d,  $J = 11.3$  Hz). **HRMS** (ESI) for  $\text{C}_{22}\text{H}_{27}\text{BrF}_2\text{NaO}_4\text{S}$   $[\text{M} + \text{Na}]^+$ , calcd: 527.0674, found: 527.0670. Isomer 2:  **$^{13}\text{C}$  NMR** (75 MHz,  $\text{CDCl}_3$ )  $\delta$  163.6 (t,  $^2J_{\text{C-F}} = 32.3$  Hz), 134.8, 134.0, 130.7, 129.2, 114.2 (t,  $^1J_{\text{C-F}} = 249.8$  Hz), 89.8, 67.8, 48.5, 48.3, 41.3, 39.7, 34.8, 31.9 (t,  $^2J_{\text{C-F}} = 26.3$  Hz), 29.7, 26.6, 25.8, 20.1, 19.4.  **$^{19}\text{F}$  NMR** (282 MHz,  $\text{CDCl}_3$ )  $\delta$  -113.52 (d,  $J = 11.3$  Hz). **HRMS** (ESI) for  $\text{C}_{22}\text{H}_{27}\text{BrF}_2\text{NaO}_4\text{S}$   $[\text{M} + \text{Na}]^+$ , calcd: 527.0674, found: 527.0670.

**(1*R*,2*R*,4*R*)-1,7,7-trimethylbicyclo[2.2.1]heptan-2-yl 2-(3-bromo-3-(phenylsulfonyl)cyclobutyl)-2,2-difluoroacetate (5e)**

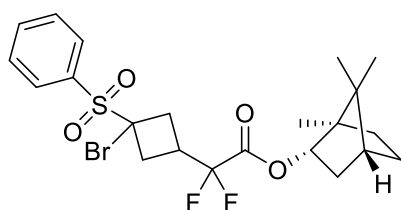

Prepared according to General Procedure A, compound **5e** was obtained as colorless oil (53 mg, 52 % yield,  $dr = 2.4:1$ ). Mixture of isomer 1 and isomer 2:  **$^1\text{H}$  NMR** (300 MHz,  $\text{CDCl}_3$ )  $\delta$  8.06 – 7.92 (m, 2H), 7.77 – 7.67 (m, 1H), 7.64 – 7.55 (m, 2H), 4.79 (dd,  $J = 7.3, 3.8$  Hz, 1H), 3.52 – 3.25 (m, 3H), 3.03 – 2.40 (m, 2H), 1.90 – 1.65 (m, 4H), 1.64 – 1.55 (m, 1H), 1.20 – 1.04 (m, 2H), 0.97 (s, 3H), 0.85 (s, 6H). Isomer 1:  **$^{13}\text{C}$  NMR** (75 MHz,  $\text{CDCl}_3$ )  $\delta$  162.6 (t,  $^2J_{\text{C-F}} = 32.3$  Hz), 135.0, 133.6, 131.3, 129.1, 113.8 (t,  $^1J_{\text{C-F}} = 250.5$  Hz), 84.5, 65.4, 49.2, 47.1, 45.0, 38.5, 35.7 (t,  $^3J_{\text{C-F}} = 5.3$  Hz), 34.3 (t,  $^2J_{\text{C-F}} = 26.3$  Hz), 33.6, 27.0, 20.1, 19.9, 11.5.  **$^{19}\text{F}$  NMR** (282 MHz,  $\text{CDCl}_3$ )  $\delta$  -114.55. **HRMS** (ESI) for  $\text{C}_{22}\text{H}_{27}\text{BrF}_2\text{NaO}_4\text{S}$   $[\text{M} + \text{Na}]^+$ , calcd: 527.0674, found: 527.0671. Isomer 2:  **$^{13}\text{C}$  NMR** (75 MHz,  $\text{CDCl}_3$ )  $\delta$  162.7 (t,  $^2J_{\text{C-F}} = 32.3$  Hz), 134.8, 134.0, 130.7, 129.2, 114.1 (t,  $^1J_{\text{C-F}} = 250.5$  Hz), 84.5, 67.8, 49.2, 47.1, 45.0, 38.5, 34.8 (t,  $^3J_{\text{C-F}} = 5.3$  Hz), 33.6, 31.9 (t,  $^2J_{\text{C-F}} = 26.3$  Hz), 27.0, 20.1, 19.9, 11.5.  **$^{19}\text{F}$  NMR** (282 MHz,  $\text{CDCl}_3$ )  $\delta$  -113.76. **HRMS** (ESI) for  $\text{C}_{22}\text{H}_{27}\text{BrF}_2\text{NaO}_4\text{S}$   $[\text{M} + \text{Na}]^+$ , calcd: 527.0674, found: 527.0671.

**ethyl (2,2-difluoro-2-(3-(phenylsulfonyl)cyclobutyl)acetyl)-L-methioninate (5f)**

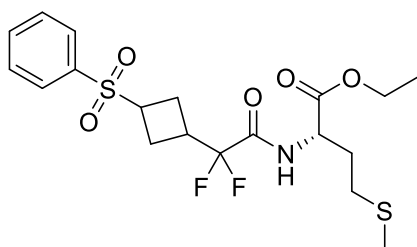

Prepared according to General Procedure B, compound **5f** was obtained as colorless oil (58 mg, 65 % yield, *dr* > 20:1). **<sup>1</sup>H NMR** (300 MHz, CDCl<sub>3</sub>) δ 7.92 – 7.84 (m, 2H), 7.67 (t, *J* = 7.4 Hz, 1H), 7.61 – 7.53 (m, 2H), 7.09 (d, *J* = 7.2 Hz, 1H), 4.71 – 4.62 (m, 1H), 4.24 (q, *J* = 7.2 Hz, 2H), 3.78 – 3.64 (m, 1H), 3.09 – 2.88 (m, 1H), 2.79 – 2.63 (m, 2H), 2.51 (t, *J* = 7.4 Hz, 2H), 2.33 – 2.14 (m, 3H), 2.13 – 1.99 (m, 4H), 1.30 (t, *J* = 7.1 Hz, 3H). **<sup>13</sup>C NMR** (75 MHz, CDCl<sub>3</sub>) δ 170.8, 163.2 (t, <sup>2</sup>*J*<sub>C-F</sub> = 29.3 Hz), 137.5, 134.0, 129.5, 128.4, 115.7 (t, <sup>1</sup>*J*<sub>C-F</sub> = 252.0 Hz), 62.2, 52.2, 51.7, 32.0 (t, <sup>2</sup>*J*<sub>C-F</sub> = 26.3 Hz), 31.0, 29.9, 22.8 (t, <sup>3</sup>*J*<sub>C-F</sub> = 4.5 Hz), 15.5, 14.2. **<sup>19</sup>F NMR** (282 MHz, CDCl<sub>3</sub>) δ -113.17 – -115.72 (m, 2F). **HRMS** (ESI) for C<sub>19</sub>H<sub>25</sub>F<sub>2</sub>NNaO<sub>5</sub>S<sub>2</sub> [M + Na]<sup>+</sup>, calcd: 472.1034, found: 472.1021.

**ethyl (2,2-difluoro-2-(3-(phenylsulfonyl)cyclobutyl)acetyl)-L-phenylalaninate (5g)**

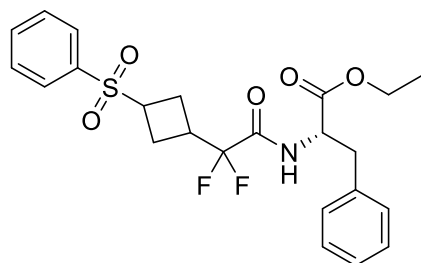

Prepared according to General Procedure B, compound **5g** was obtained as a white solid. (63 mg, 68 % yield, *dr* > 20:1). **<sup>1</sup>H NMR** (300 MHz, CDCl<sub>3</sub>) δ 7.90 – 7.83 (m, 2H), 7.71 – 7.63 (m, 1H), 7.61 – 7.53 (m, 2H), 7.33 – 7.26 (m, 3H), 7.14 – 7.06 (m, 2H), 6.75 (d, *J* = 7.8 Hz, 1H), 4.86 – 4.75 (m, 1H), 4.21 (q, *J* = 7.2 Hz, 2H), 3.75 – 3.60 (m, 1H), 3.24 – 3.05 (m, 2H), 3.01 – 2.79 (m, 1H), 2.71 – 2.52 (m, 2H), 2.27 – 2.07 (m, 2H), 1.26 (t, *J* = 7.2 Hz, 3H). **<sup>13</sup>C NMR** (75 MHz, CDCl<sub>3</sub>) δ 170.4, 162.9 (t, <sup>2</sup>*J*<sub>C-F</sub> = 29.3 Hz), 137.6, 135.2, 134.0, 129.5, 129.3, 128.8, 128.5, 127.5, 115.7 (t, <sup>1</sup>*J*<sub>C-F</sub> = 252.0 Hz), 62.1, 53.2, 52.2, 37.7, 32.0 (t, <sup>2</sup>*J*<sub>C-F</sub> = 26.3 Hz), 22.8 (q, <sup>3</sup>*J*<sub>C-F</sub> = 4.5 Hz), 14.2. **<sup>19</sup>F NMR** (282 MHz, CDCl<sub>3</sub>) δ -114.74. **HRMS** (ESI) for C<sub>23</sub>H<sub>25</sub>F<sub>2</sub>NNaO<sub>5</sub>S [M + Na]<sup>+</sup>, calcd: 488.1314, found: 488.1299.

**1-(4-(8-chloro-5,6-dihydro-11H-benzo[5,6]cyclohepta[1,2-b]pyridin-11-ylidene)piperidin-1-yl)-2,2-difluoro-2-(3-(phenylsulfonyl)cyclobutyl)ethan-1-one (5h)**

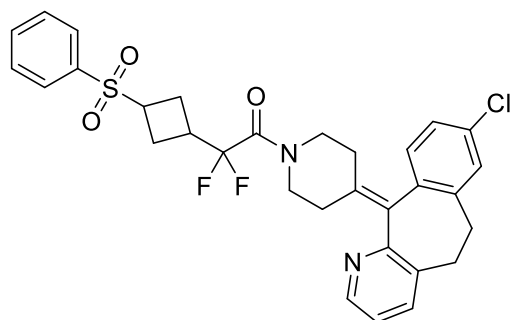

Prepared according to General Procedure B, compound **5h** was obtained as a white solid. (48 mg, 41 % yield, *dr* > 20:1). **<sup>1</sup>H NMR** (300 MHz, CDCl<sub>3</sub>) δ 8.42 (d, *J* = 5.0 Hz, 1H), 7.87 (d, *J* = 7.1 Hz, 2H), 7.69 – 7.60 (m, 1H), 7.60 – 7.45 (m, 3H), 7.21 – 7.09 (m, 4H), 4.07 – 3.86 (m, 2H), 3.79 – 3.66 (m, 1H), 3.51 – 3.28 (m, 3H), 3.28 – 3.01 (m, 2H), 2.95 – 2.75 (m, 2H), 2.74 – 2.49 (m, 3H), 2.48 – 2.22 (m, 5H). **<sup>13</sup>C NMR** (101 MHz, CDCl<sub>3</sub>) δ 161.1 (t, <sup>2</sup>*J*<sub>C-F</sub> = 30.3 Hz), 156.7, 146.7, 139.6, 137.9, 137.8, 137.5, 136.3, 134.9, 133.9, 133.5, 133.2, 130.5, 129.4, 129.2, 128.4, 126.4, 122.6, 117.8 (t, <sup>1</sup>*J*<sub>C-F</sub> = 257.6 Hz), 52.6, 46.2, 44.2, 33.2, 33.0 (t, <sup>2</sup>*J*<sub>C-F</sub> = 27.3 Hz), 32.7, 31.7, 31.1, 30.3, 29.8, 23.3. **<sup>19</sup>F NMR** (282 MHz, CDCl<sub>3</sub>) δ -106.57 – -109.31 (m, 2F). **HRMS** (ESI) for C<sub>31</sub>H<sub>29</sub>ClF<sub>2</sub>N<sub>2</sub>NaO<sub>3</sub>S [M + Na]<sup>+</sup>, calcd: 605.1448, found: 605.1443.

## 6 Reference

- [1] Lopchuk, J. M.; Fjelbye, K.; Kawamata, Y.; Malins, L. R.; Pan, C.-M.; Gianatassio, R.; Wang, J.; Prieto, L.; Bradow, J.; Brandt, T. A.; Collins, M. R.; Elleraas, J.; Ewanicki, J.; Farrell, W.; Fadeyi, O. O.; Gallego, G. M.; Mousseau, J. J.; Oliver, R.; Sach, N. W.; Smith, J. K.; Spangler, J. E.; Zhu, H.; Zhu, J.; Baran, P. S. Strain-Release Heteroatom Functionalization: Development, Scope, and Stereospecificity. *J. Am. Chem. Soc.* **2017**, *139*, 3209-3226.
- [2] Gao, H.; Guo, L.; Shi, C.-C.; Zhu, Y.-N.; Yang, C.; Xia, W.-J. Transition Metal-Free Radical  $\alpha$ -Oxy C-H Cyclobutylation via Photoinduced Hydrogen Atom Transfer. *Adv. Synth. Catal.* **2022**, *364*, 2140-2145.
- [3] Jung, M.; Lindsay, V. N. G. One-Pot Synthesis of Strain-Release Reagents from Methyl Sulfones. *J. Am. Chem. Soc.* **2022**, *144*, 4764-4769.
- [4] Du, B.; Chan, C.-M.; Lee, P.-Y.; Cheung, L.-H.; Xu, X.; Lin, Z.; Yu, W.-Y., 2, 2-Difluorovinyl Benzoates for Diverse Synthesis of Gem-Difluoroenol Ethers by Ni-Catalyzed Cross-Coupling Reactions. *Nat. Commun.* **2021**, *12*, 1-10.

- [5] Huo, J.; Geng, X.; Li, W.; Zhang, P.; Wang, L. A Traceless Heterocyclic Amine Mediator in Regioselectivity-Switchable Formal [1 + 2 + 2] Cycloaddition Reaction to 1,3,4- and 1,4,5-Trisubstituted Pyrazoles. *Org. Lett.* **2023**, *25*, 512-516.
- [6] Huo, J.; Geng, X.; Li, W.; Zhang, P.; Wang, L. Photoinduced Three-Component Cyclization of Arylamines, Enaminones and Difluorobromoacetates to 2,3-Difunctionalized Quinolines. *Adv. Synth. Catal.* **2022**, *364*, 3539-3543.
- [7] Yang, J.; Sun, B.; Ding, H.; Huang, P.-Y.; Tang, X.-L.; Shi, R.-C.; Yan, Z.-Y.; Yu, C.-M.; Jin, C. Photo-triggered Self-catalyzed Fluoroalkylation/cyclization of Unactivated Alkenes: Synthesis of Quinazolinones Containing the CF<sub>2</sub>R Group. *Green Chem.* **2021**, *23*, 575-581.
- [8] Chen, C.; Zeng, R.; Zhang, J.; Zhao, Y. Ruthenium-Catalyzed Difluoroalkylation of 8-Aminoquinoline Amides at the C5-Position. *Eur. J. Org. Chem.* **2017**, *46*, 6947-6950.
- [9] Ye, Z.; Gettys, K. E.; Shen, X.; Dai, M. Copper-Catalyzed Cyclopropanol Ring Opening Csp<sup>3</sup>-Csp<sup>3</sup> Cross-Couplings with (Fluoro)Alkyl Halides. *Org. Lett.* **2015**, *17*, 6074-6077.
- [10] Bian, K.-J.; Nemoto, D., Jr; Kao, S.-C.; He, Y.; Li, Y.; Wang, X.-S.; West, J. G. Modular Difunctionalization of Unactivated Alkenes through Bio-Inspired Radical Ligand Transfer Catalysis. *J. Am. Chem. Soc.* **2022**, *144*, 11810–11821.
- [11] Da, Y.; Han, S.; Du, X.; Liu, S.; Liu, L.; Li, J. Copper(I)-Catalyzed Oxydifluoroalkylation of Alkenes: A Route to Functionalization of Lactones. *Org. Lett.* **2018**, *20*, 5149.
- [12] Yao, S. J.; Ren, Z. H.; Wang, Y. Y.; Guan, Z. H. Friedel-Crafts Fluoroacetylation of Indoles with Fluorinated Acetic Acids for the Synthesis of Fluoromethyl Indol-3-yl Ketones under Catalyst- and Additive-free Conditions. *J. Org. Chem.* **2016**, *81*, 4226-4234,
- [13] (a) Zhang, T.; Pan, J.; Duan, J.; Wu, J.; Zhang, W.; Wu, F. *ChemCatChem.* **2019**, *11*, 5778-5782. (b) Li, G.; Wang, T.; Fei, F.; Su, Y. M.; Li, Y.; Lan, Q.; Wang, X. S. *Angew. Chem. Int. Ed. Engl.* **2016**, *55*, 3491-3495. (c) Wang, D.; Wu, J.; Huang, J.; Liang, J.; Peng, P.; Chen, H.; Wu, F. *Tetrahedron.* **2017**, *73*, 3478-3484.
- [14] M. J. Frisch, G. W. Trucks, H. B. Schlegel, G. E. Scuseria, M. A. Robb, J. R. Cheeseman, G. Scalmani, V. Barone, G. A. Petersson, H. Nakatsuji, X. Li, M. Caricato, A. V. Marenich, J. Bloino, B. G. Janesko, R. Gomperts, B. Mennucci, H. P. Hratchian, J. V. Ortiz, A. F. Izmaylov, J. L. Sonnenberg, D. Williams-Young, F. Ding, F. Lipparini, F. Egidi, J. Goings, B. Peng, A. Petrone, T.



Henderson, D. Ranasinghe, V. G. Zakrzewski, J. Gao, N. Rega, G. Zheng, W. Liang, M. Hada, M. Ehara, K. Toyota, R. Fukuda, J. Hasegawa, M. Ishida, T. Nakajima, Y. Honda, O. Kitao, H. Nakai, T. Vreven, K. Throssell, J. A. Montgomery, Jr., J. E. Peralta, F. Ogliaro, M. J. Bearpark, J. J. Heyd, E. N. Brothers, K. N. Kudin, V. N. Staroverov, T. A. Keith, R. Kobayashi, J. Normand, K. Raghavachari, A. P. Rendell, J. C. Burant, S. S. Iyengar, J. Tomasi, M. Cossi, J. M. Millam, M. Klene, C. Adamo, R. Cammi, J. W. Ochterski, R. L. Martin, K. Morokuma, O. Farkas, J. B. Foresman, and D. J. Fox, Gaussian 16, Revision C.01, Gaussian, Inc., Wallingford CT, 2019.

[15] Y. Zhao, D. G. Truhlar, *Theor. Chem. Acc.* **2008**, *120*, 215.

[16] Y. Zhao, D. G. Truhlar, *Acc. Chem. Res.* **2008**, *41*, 157.

[17] F. Weigend, R. Ahlrichs, *Phys. Chem. Chem. Phys.* **2005**, *7*, 3297.

[18] M. Cossi, G. Scalmani, N. Rega, V. Barone, *J. Chem. Phys.* **2002**, *117*, 43.

[19] A. V. Marenich, C. J. Cramer, D. G. Truhlar, *J. Phys. Chem. B.* **2009**, *113*, 6378.

[20] R. Bauernschmitt, R. Ahlrichs, *J. Chem. Phys.* **1996**, *104*, 9047.

[21] C. Gonzalez, H. B. Schlegel, *J. Chem. Phys.* **1989**, *90*, 2154.

[22] C. Gonzalez, H. B. Schlegel, *J. Phys. Chem.* **1990**, *94*, 5523.

## 7 NMR spectra ( $^1\text{H}$ , $^{13}\text{C}$ and $^{19}\text{F}$ )

### $^1\text{H}$ NMR Spectrum of Compound **1a** (300 MHz, $\text{DMSO-}d_6$ )

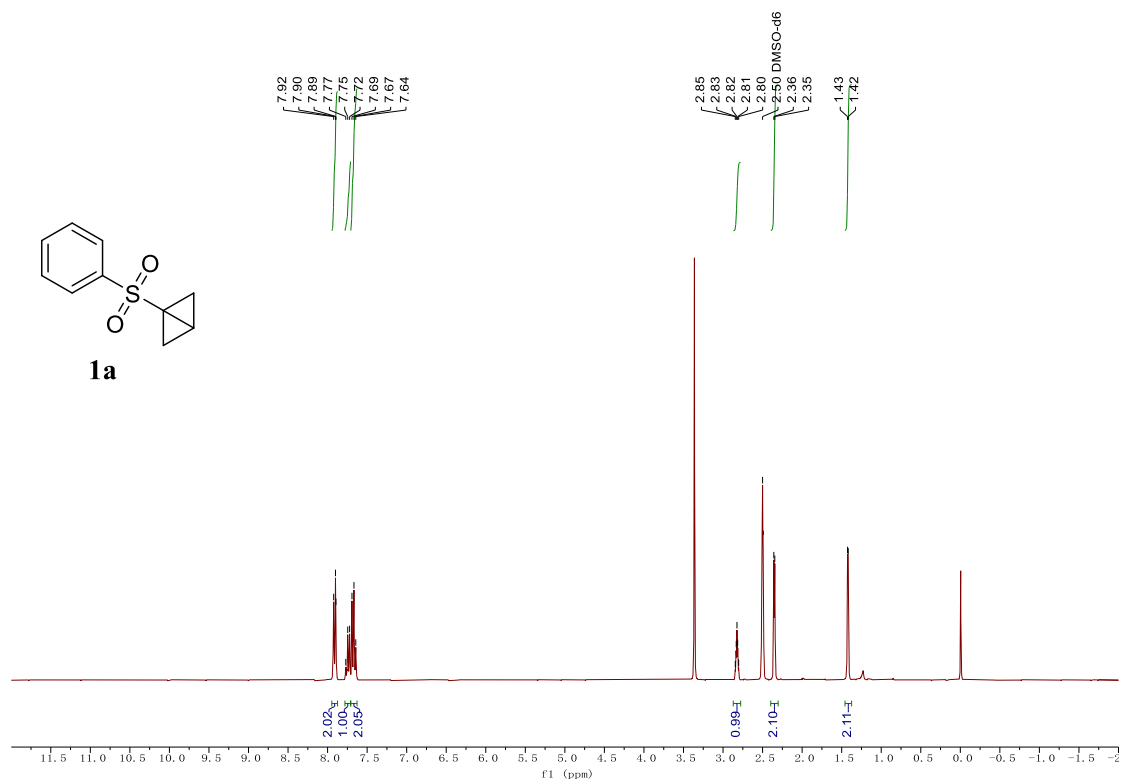

### $^1\text{H}$ NMR Spectrum of Compound **1b** (300 MHz, $\text{CDCl}_3$ )

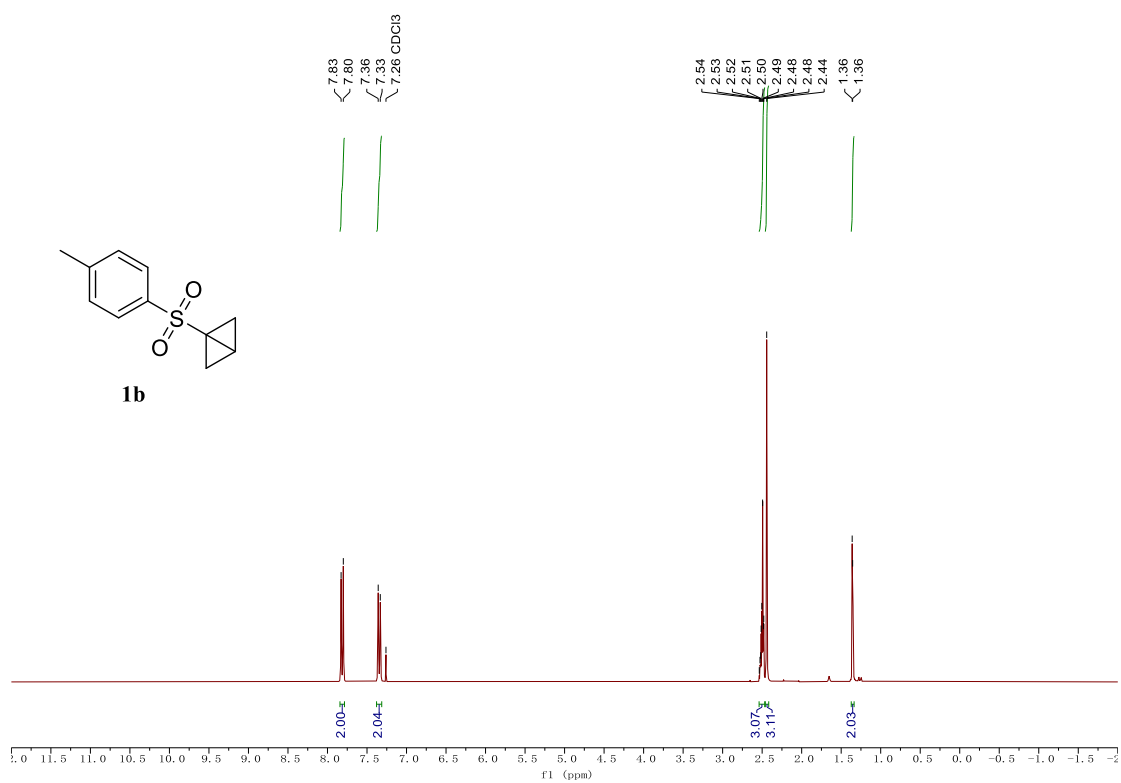

<sup>1</sup>H NMR Spectrum of Compound **1c** (300 MHz, CDCl<sub>3</sub>)

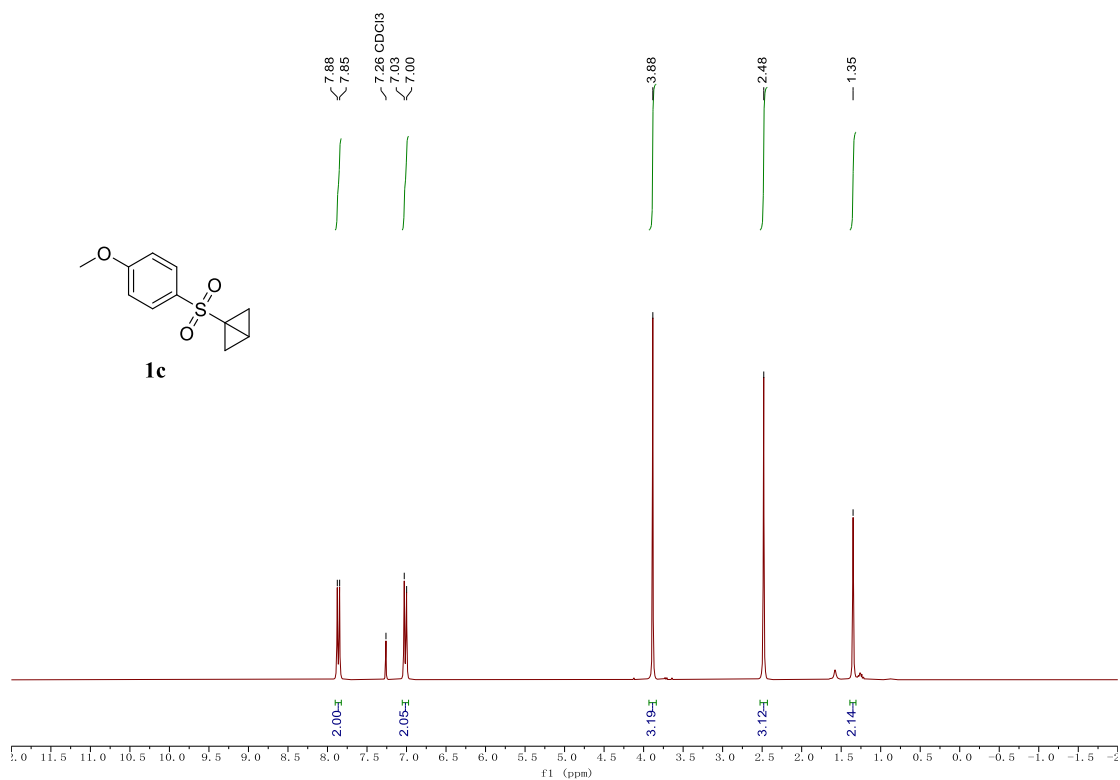

<sup>1</sup>H NMR Spectrum of Compound **1d** (300 MHz, CDCl<sub>3</sub>)

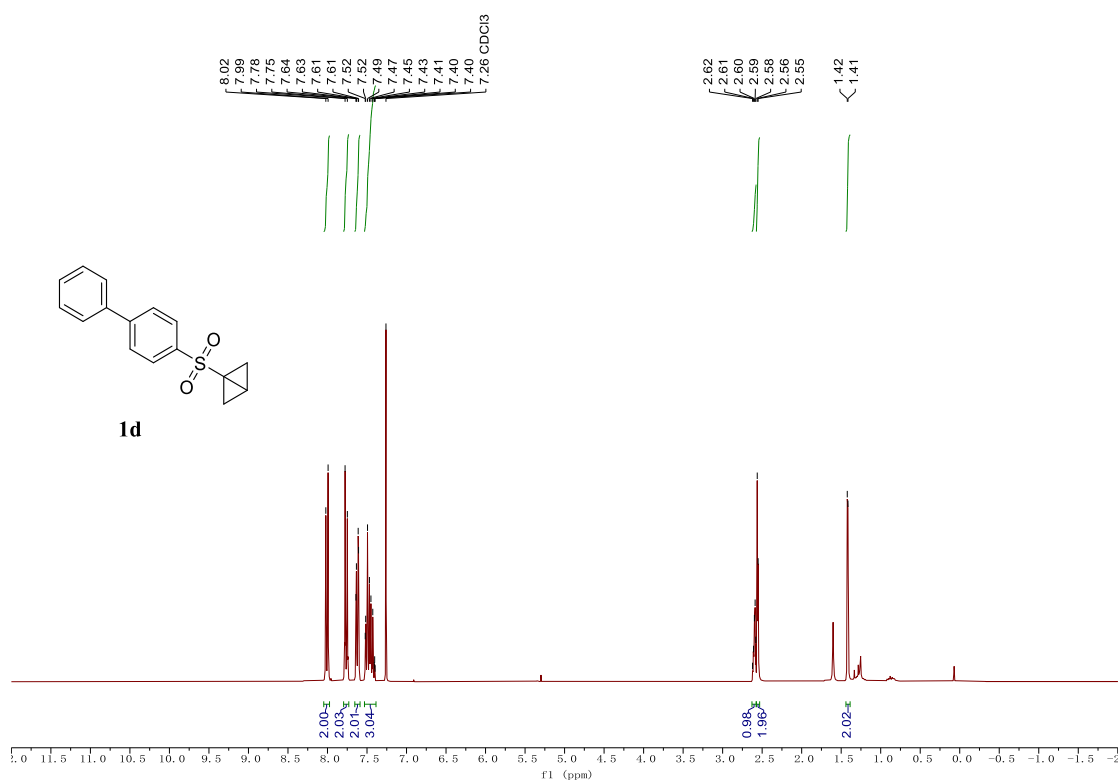

$^{13}\text{C}$  NMR Spectrum of Compound **1d** (101 MHz,  $\text{DMSO-}d_6$ )

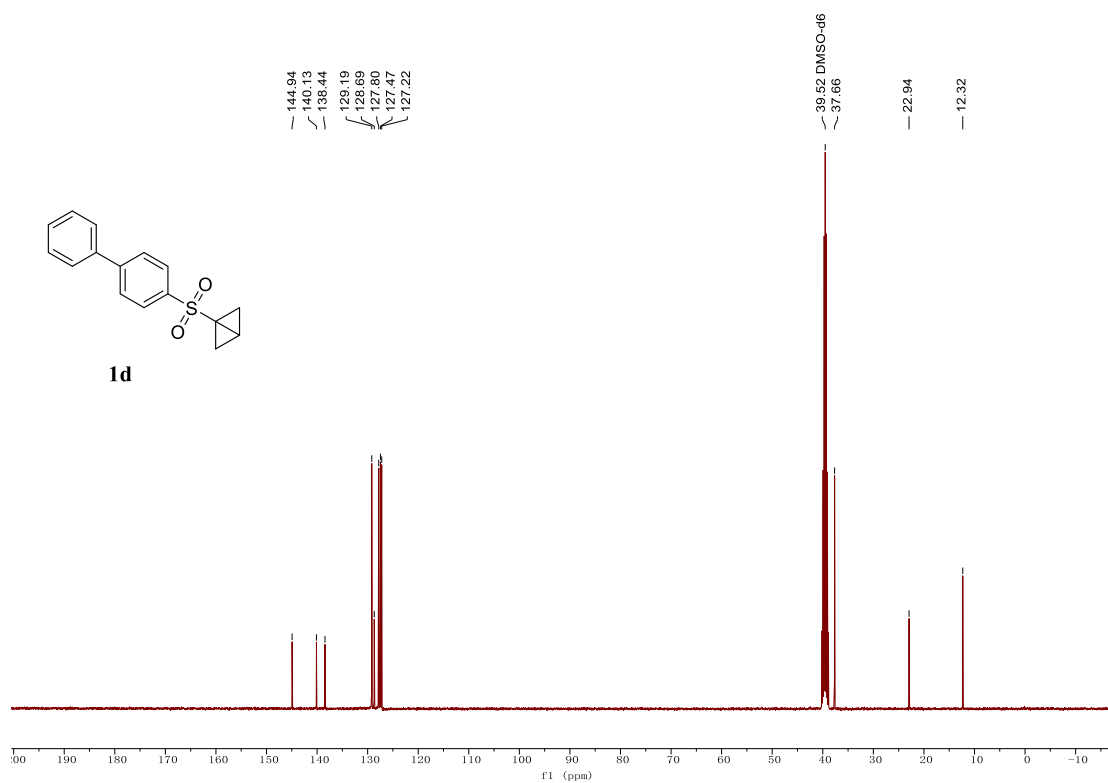

$^1\text{H}$  NMR Spectrum of Compound **1e** (300 MHz,  $\text{CDCl}_3$ )

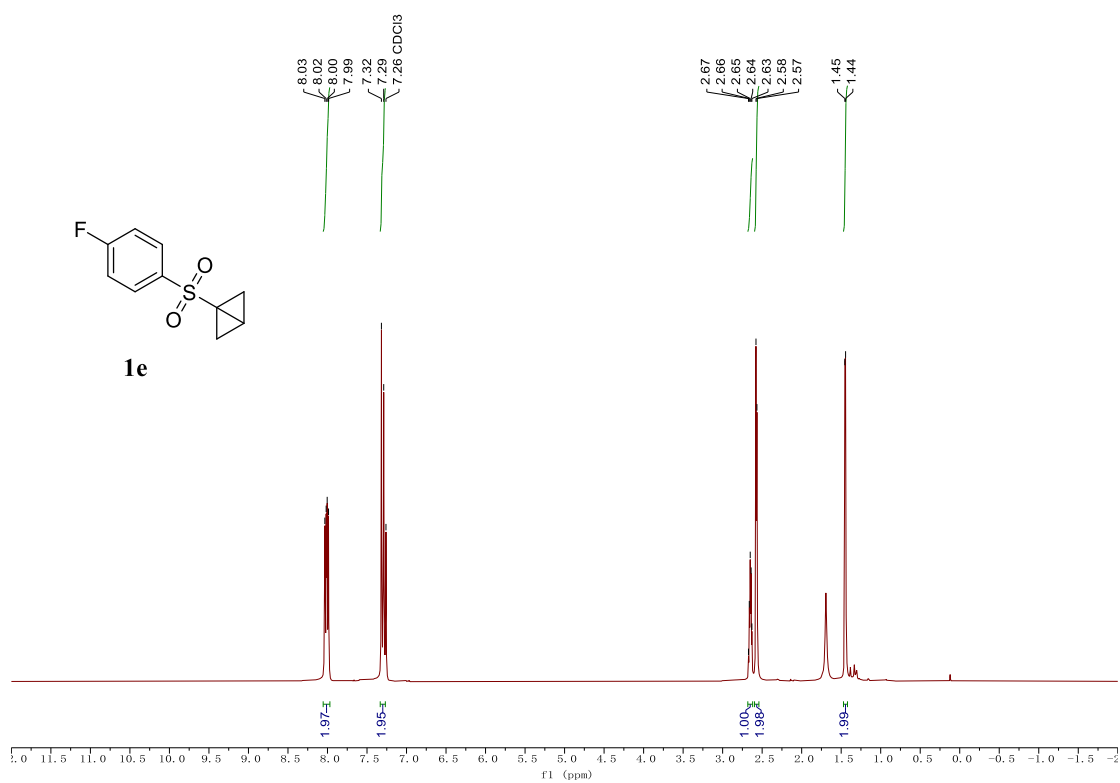

<sup>19</sup>F NMR Spectrum of Compound **1e** (282 MHz, CDCl<sub>3</sub>)

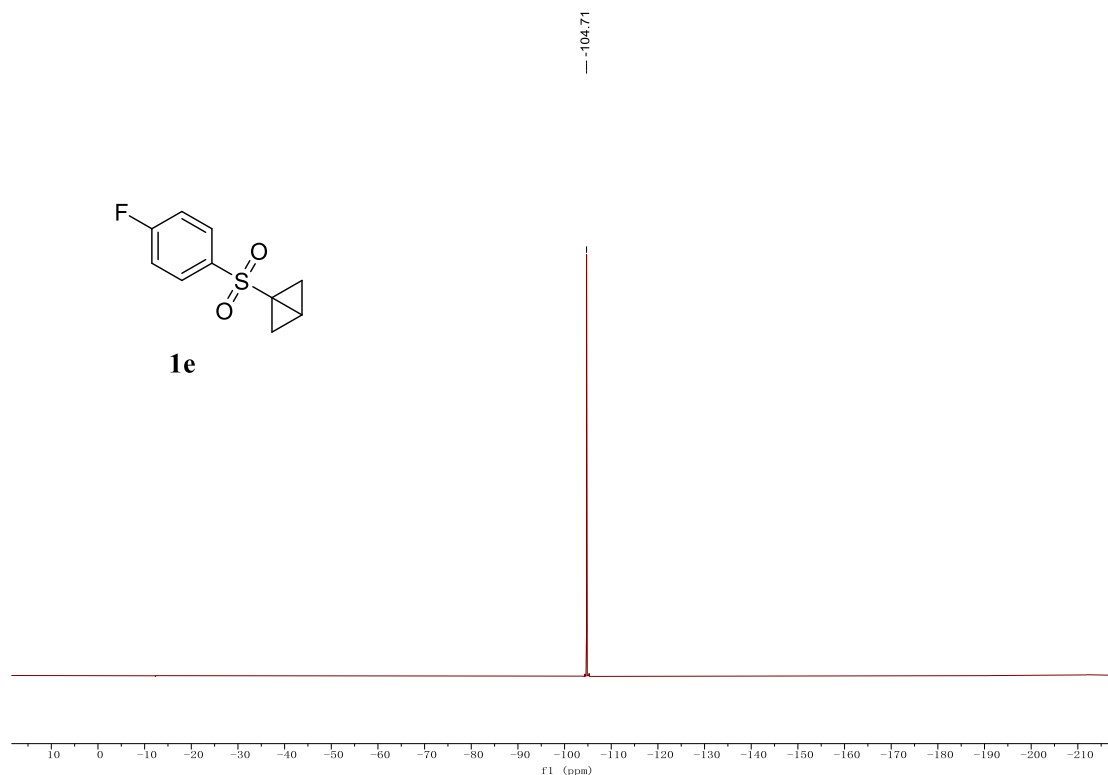

<sup>1</sup>H NMR Spectrum of Compound **1f** (300 MHz, CDCl<sub>3</sub>)

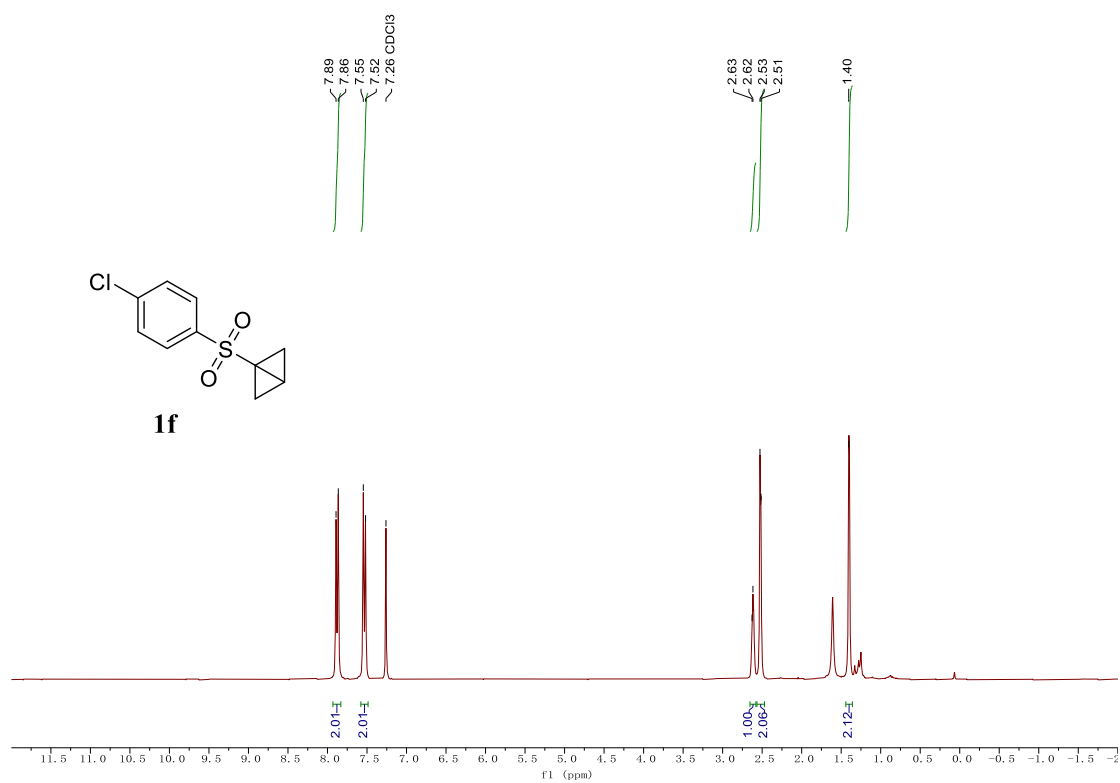

<sup>1</sup>H NMR Spectrum of Compound **1g** (300 MHz, CDCl<sub>3</sub>)

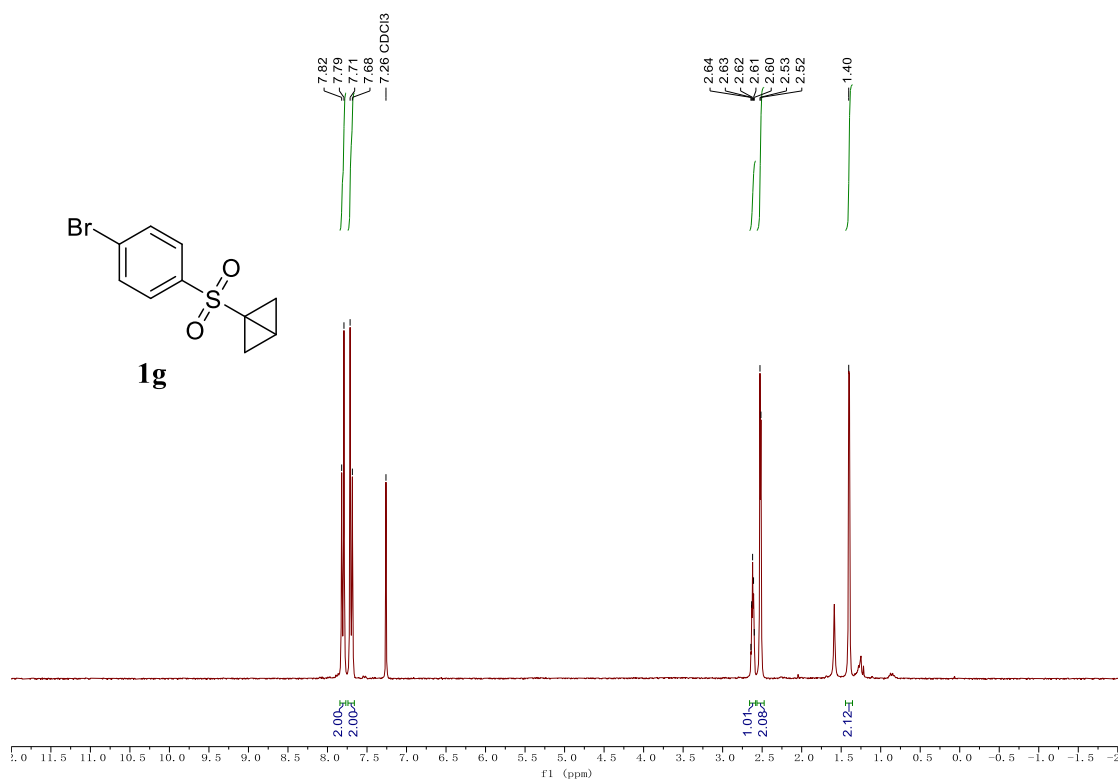

<sup>1</sup>H NMR Spectrum of Compound **1h** (300 MHz, CDCl<sub>3</sub>)

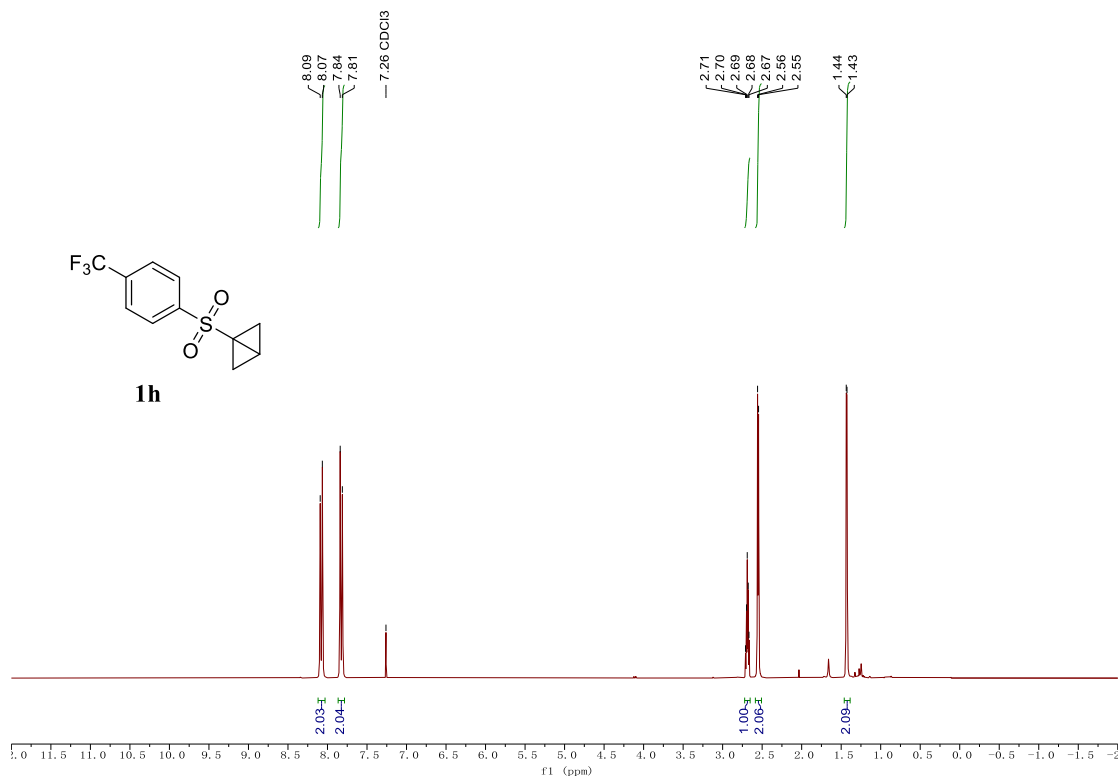

$^{19}\text{F}$  NMR Spectrum of Compound **1h** (282 MHz,  $\text{CDCl}_3$ )

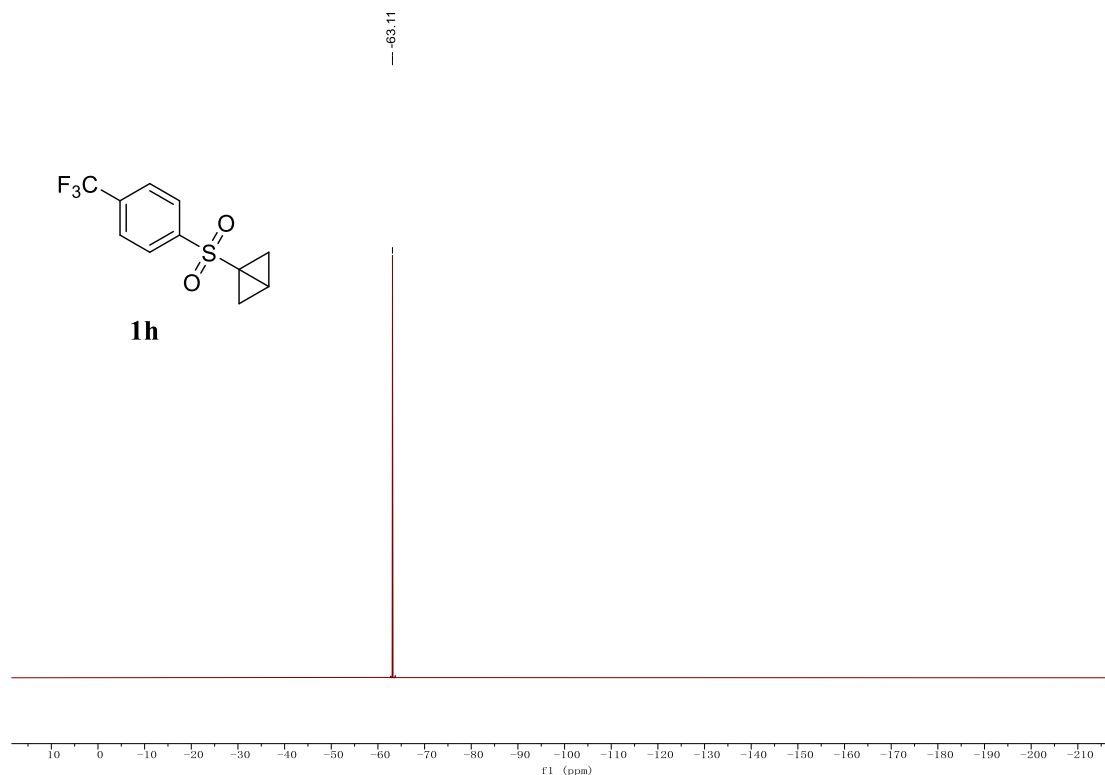

$^1\text{H}$  NMR Spectrum of Compound **1i** (300 MHz,  $\text{CDCl}_3$ )

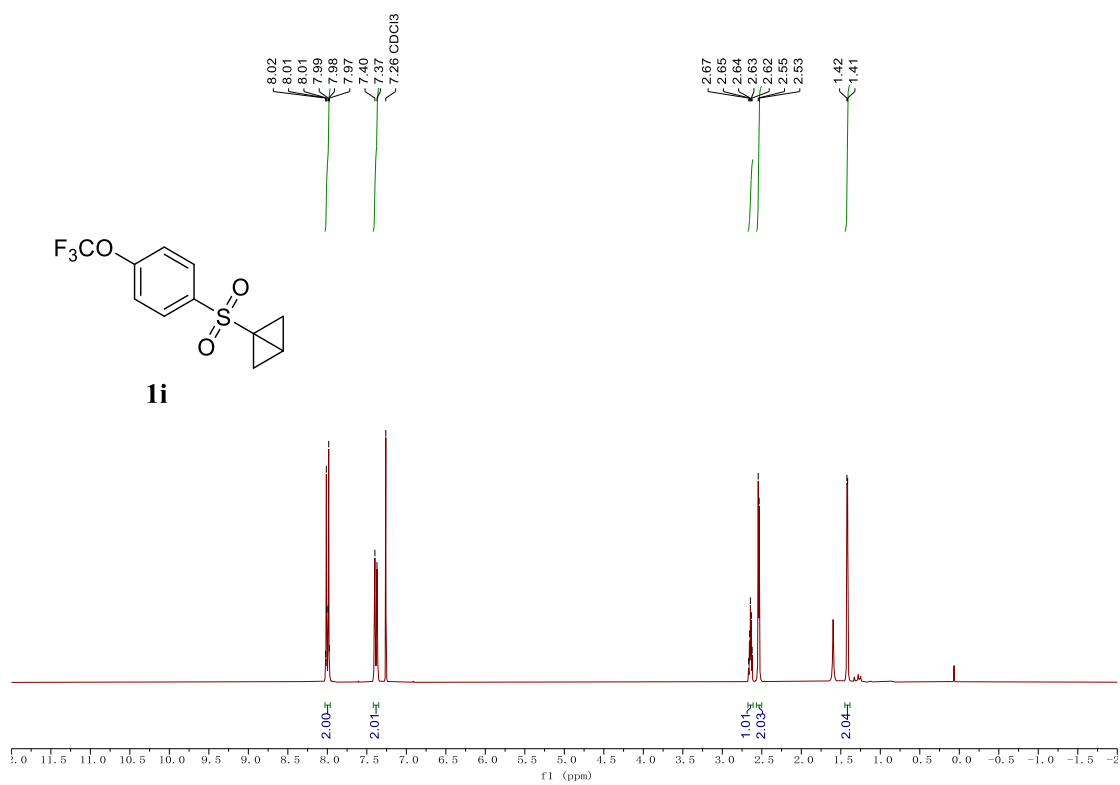

<sup>19</sup>F NMR Spectrum of Compound **1i** (282 MHz, CDCl<sub>3</sub>)

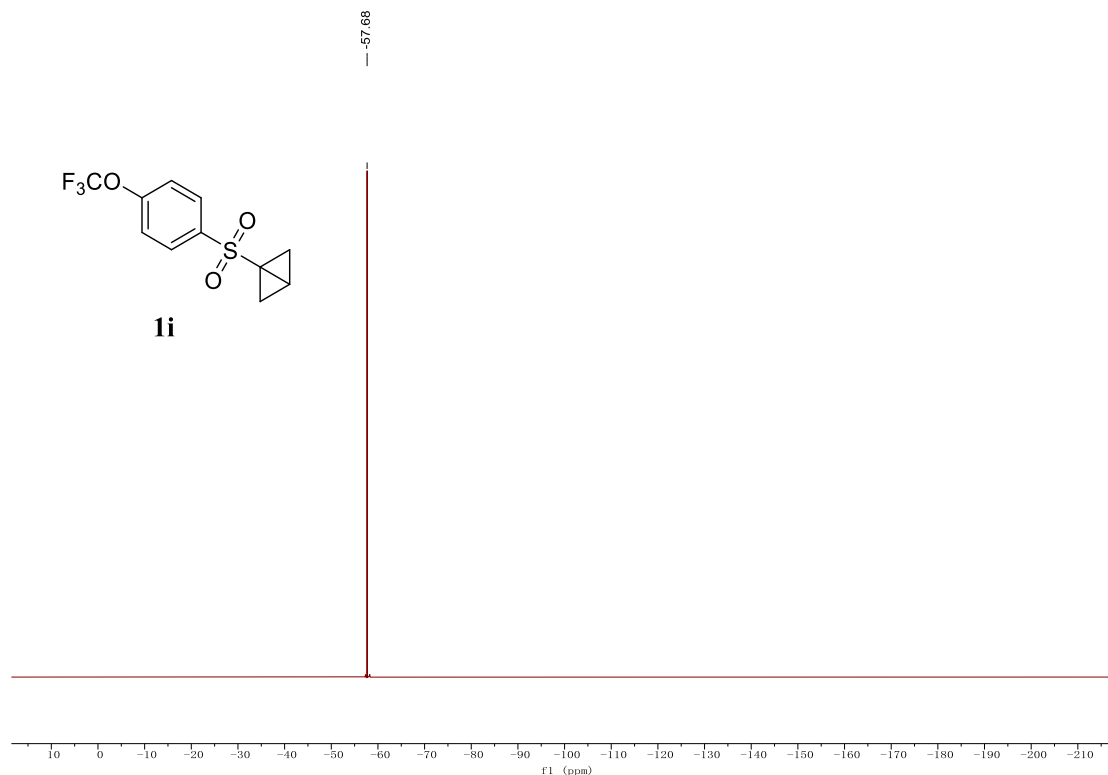

<sup>1</sup>H NMR Spectrum of Compound **1j** (300 MHz, CDCl<sub>3</sub>)

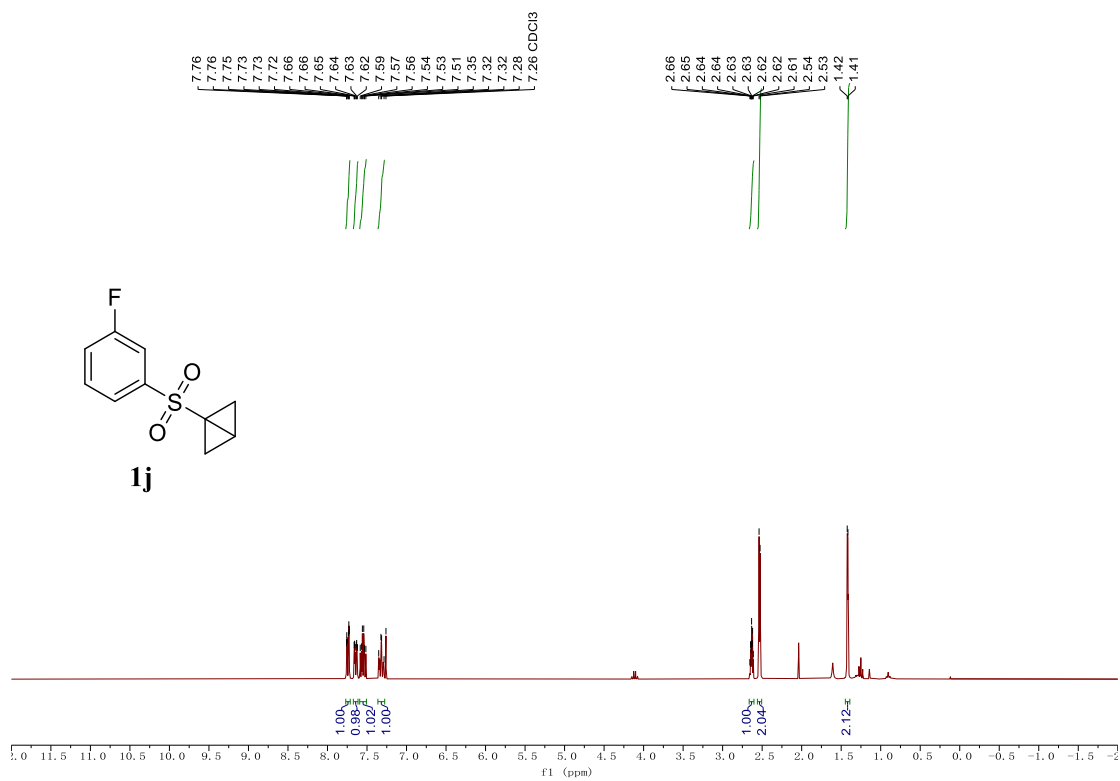



<sup>19</sup>F NMR Spectrum of Compound **1j** (282 MHz, CDCl<sub>3</sub>)

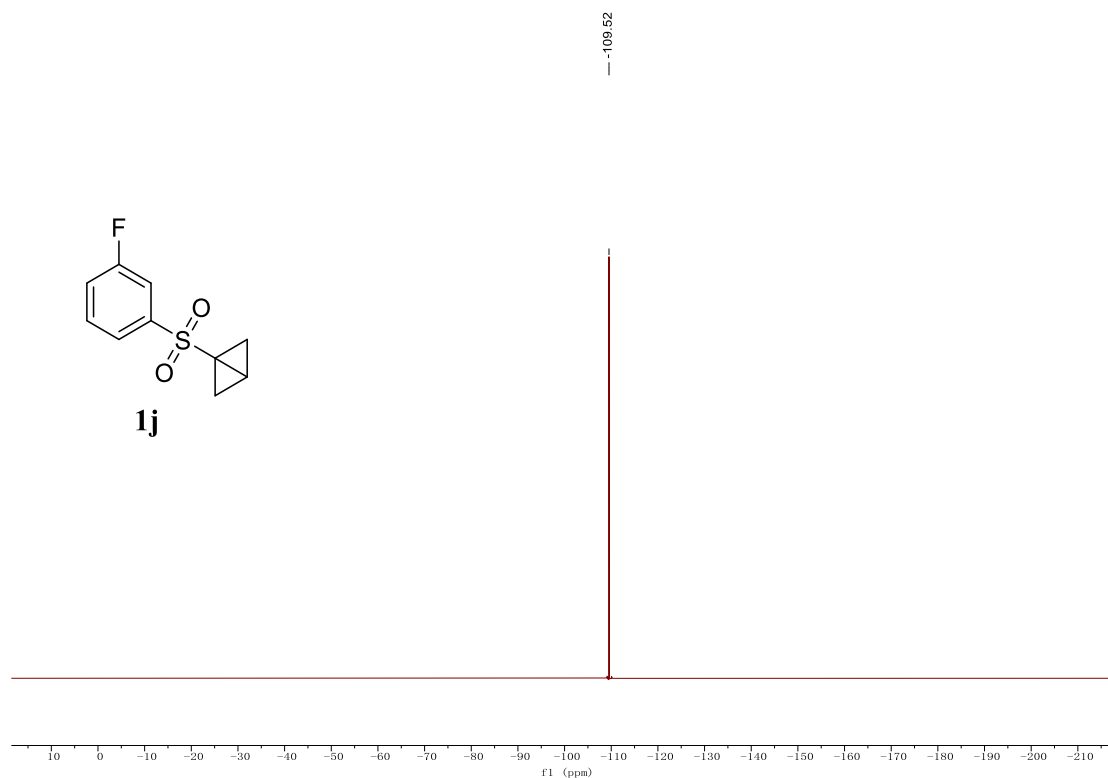

<sup>1</sup>H NMR Spectrum of Compound **1k** (300 MHz, CDCl<sub>3</sub>)

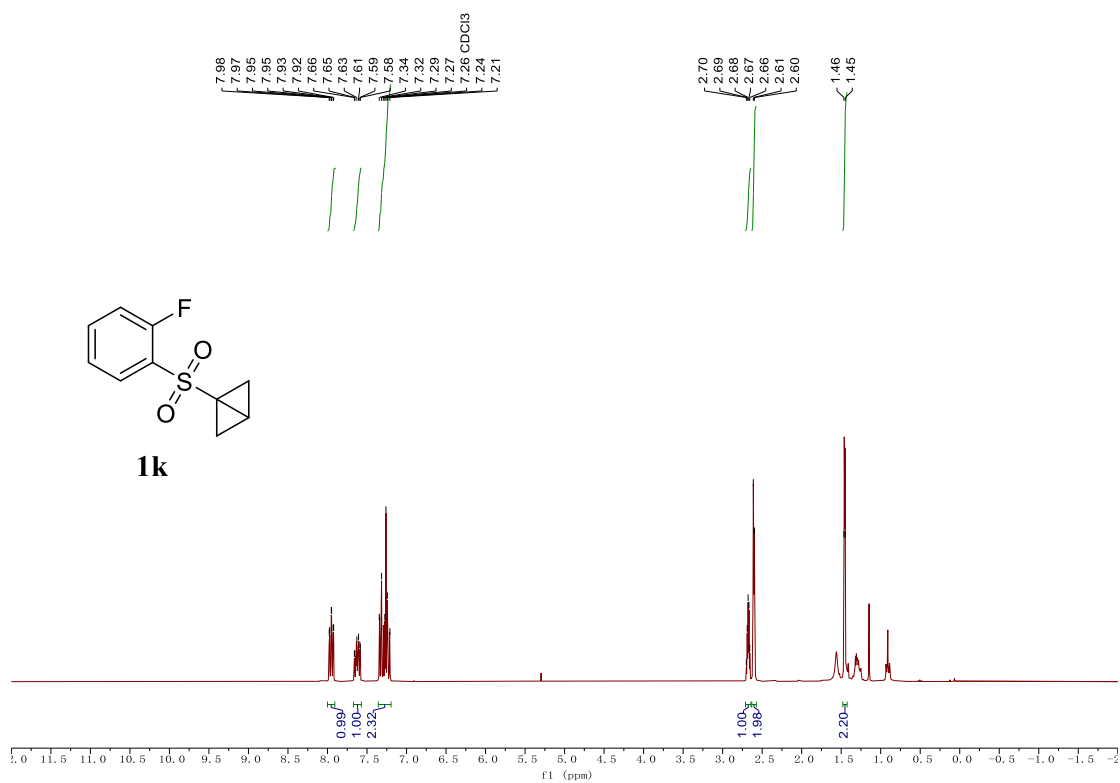

$^{19}\text{F}$  NMR Spectrum of Compound **1k** (282 MHz,  $\text{CDCl}_3$ )

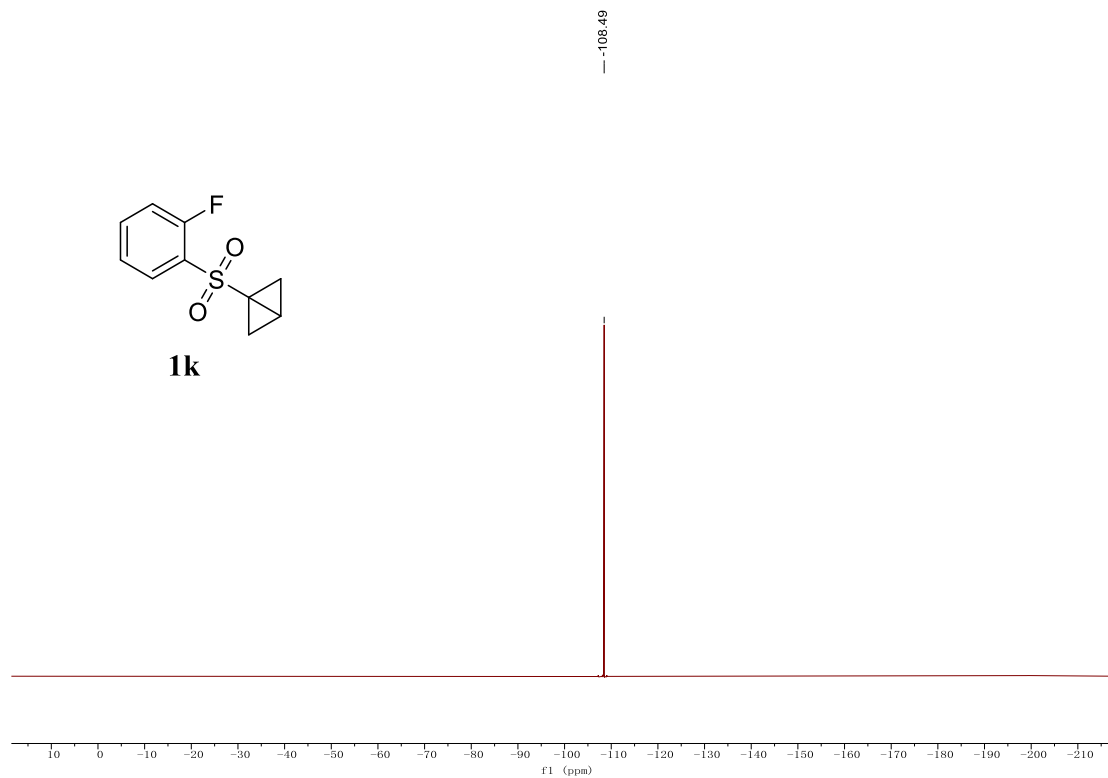

$^1\text{H}$  NMR Spectrum of Compound **1l** (300 MHz,  $\text{CDCl}_3$ )

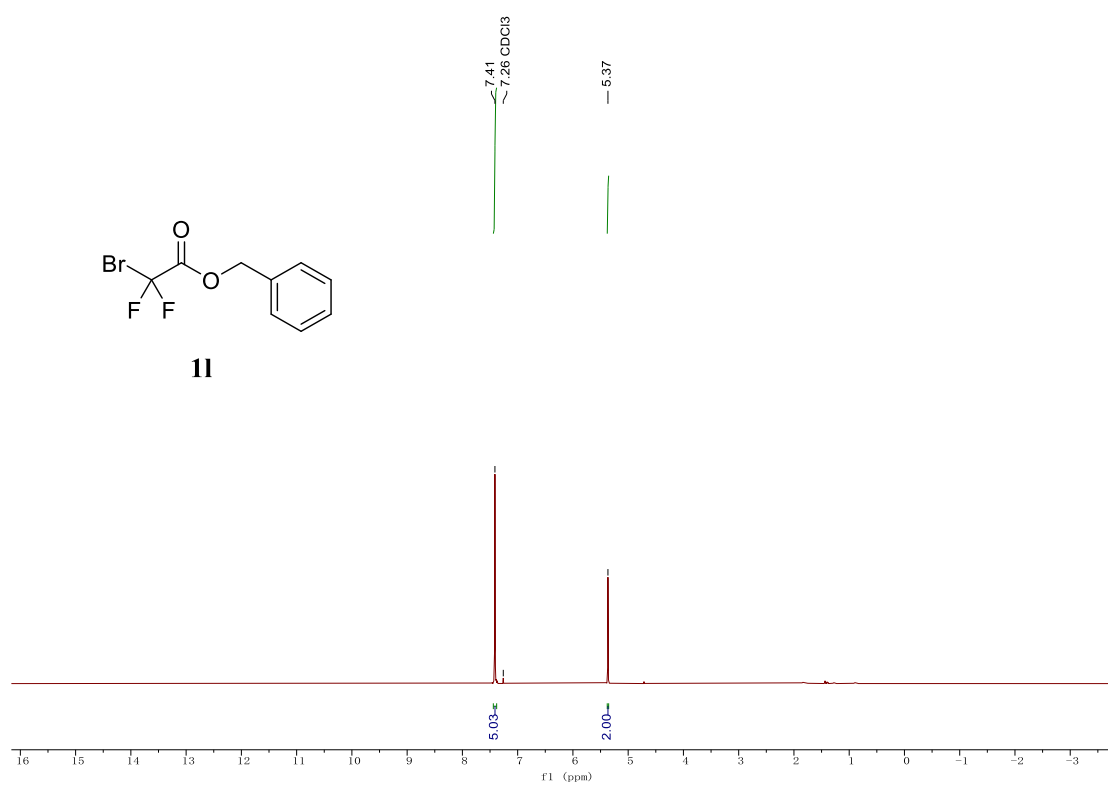

$^{19}\text{F}$  NMR Spectrum of Compound **1l** (282 MHz,  $\text{CDCl}_3$ )

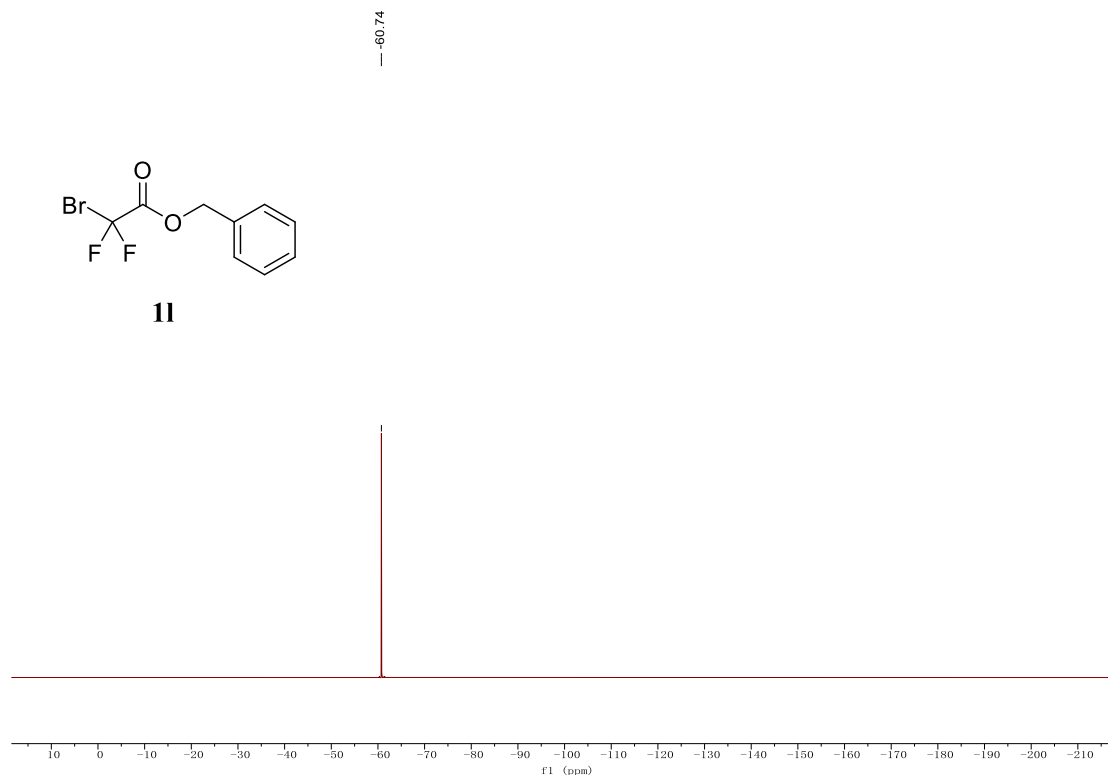

$^1\text{H}$  NMR Spectrum of Compound **1m** (300 MHz,  $\text{CDCl}_3$ )

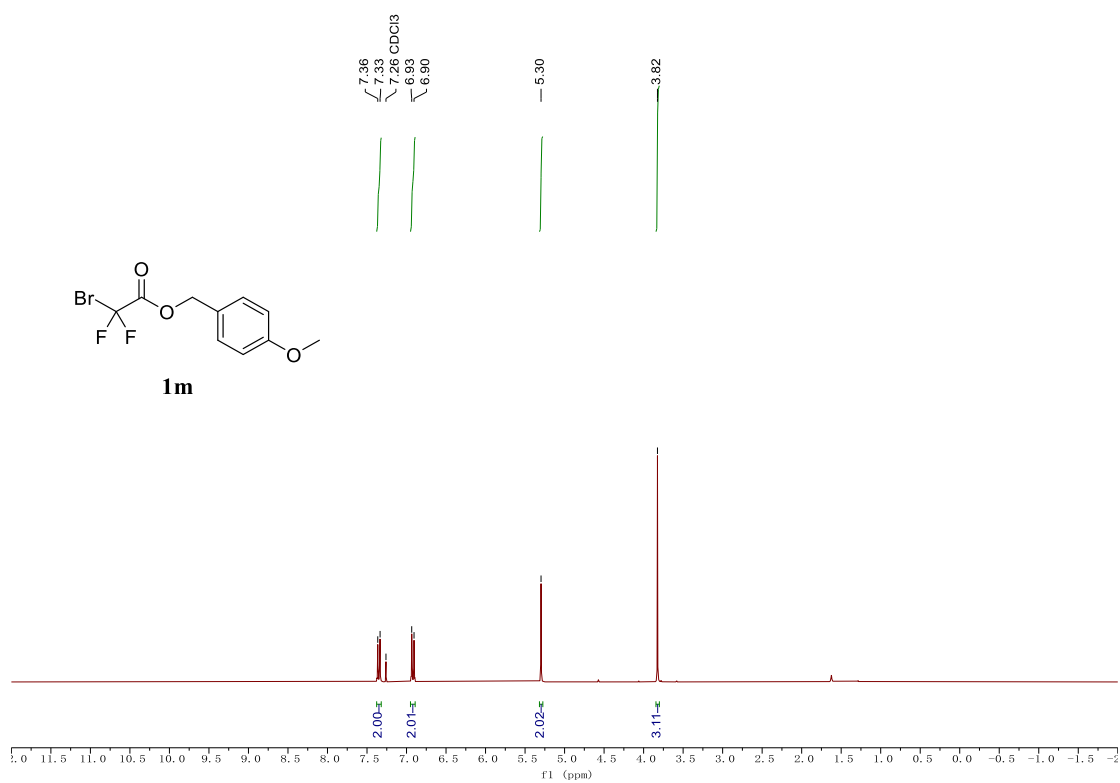

<sup>13</sup>C NMR Spectrum of Compound **1m** (75 MHz, CDCl<sub>3</sub>)

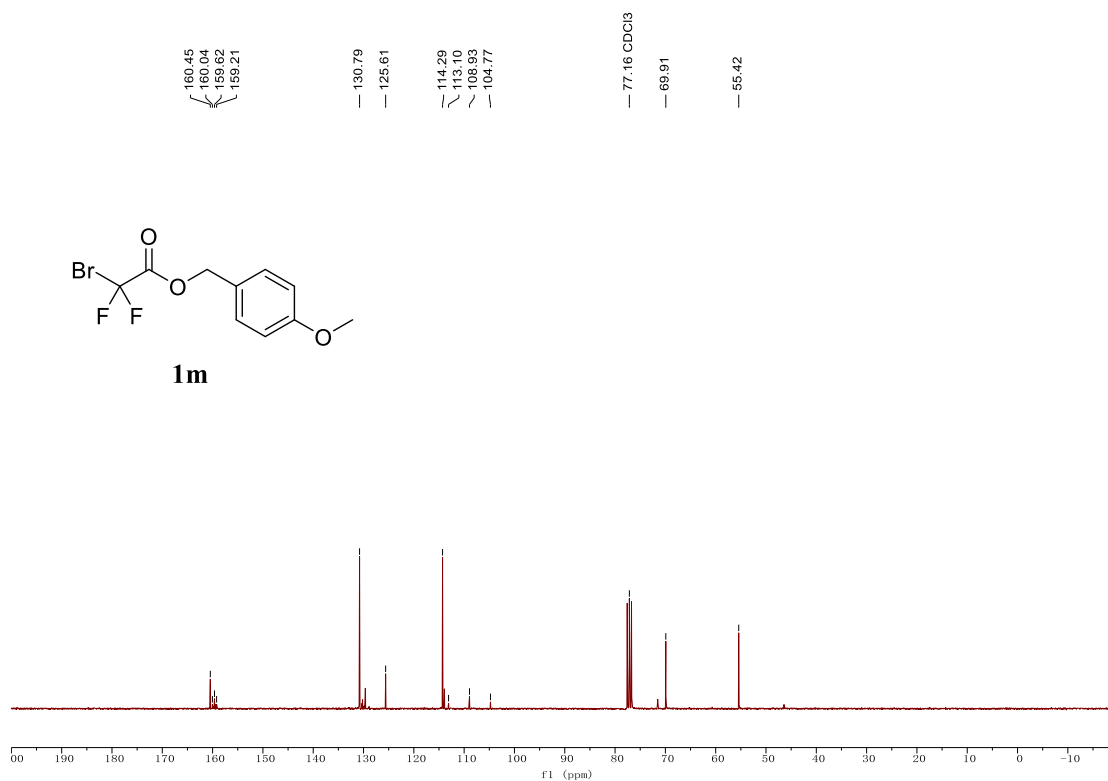

<sup>19</sup>F NMR Spectrum of Compound **1m** (282 MHz, CDCl<sub>3</sub>)

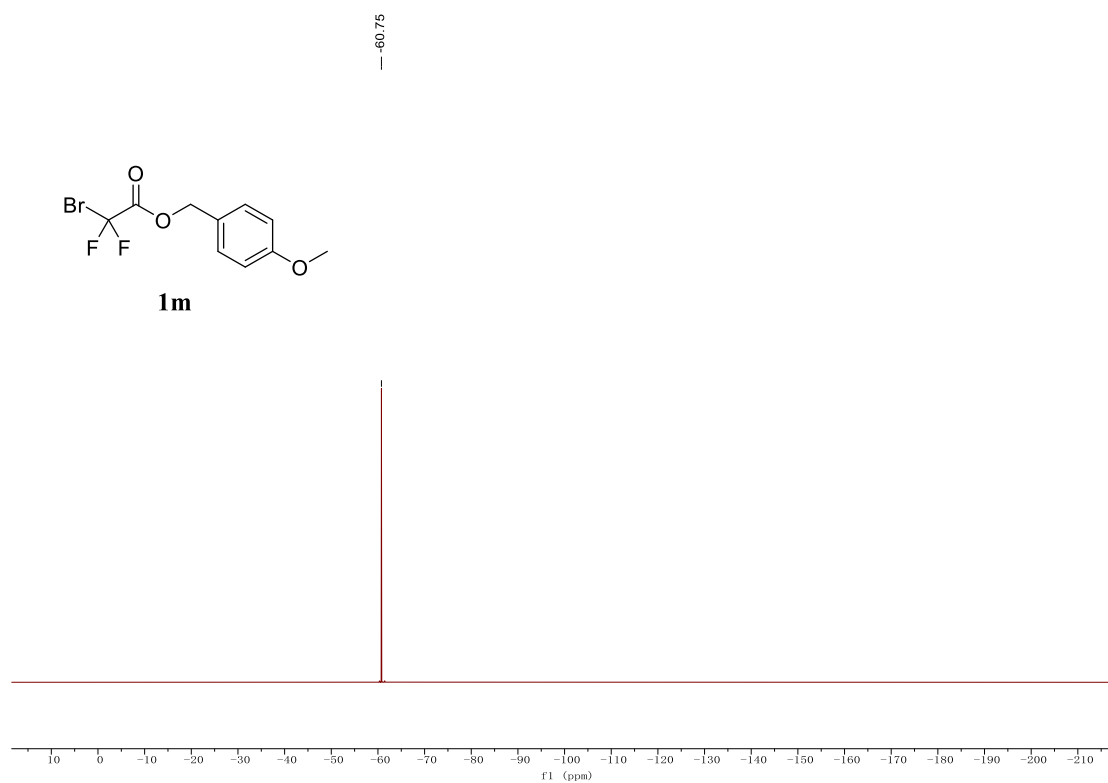

<sup>1</sup>H NMR Spectrum of Compound **1n** (300 MHz, CDCl<sub>3</sub>)

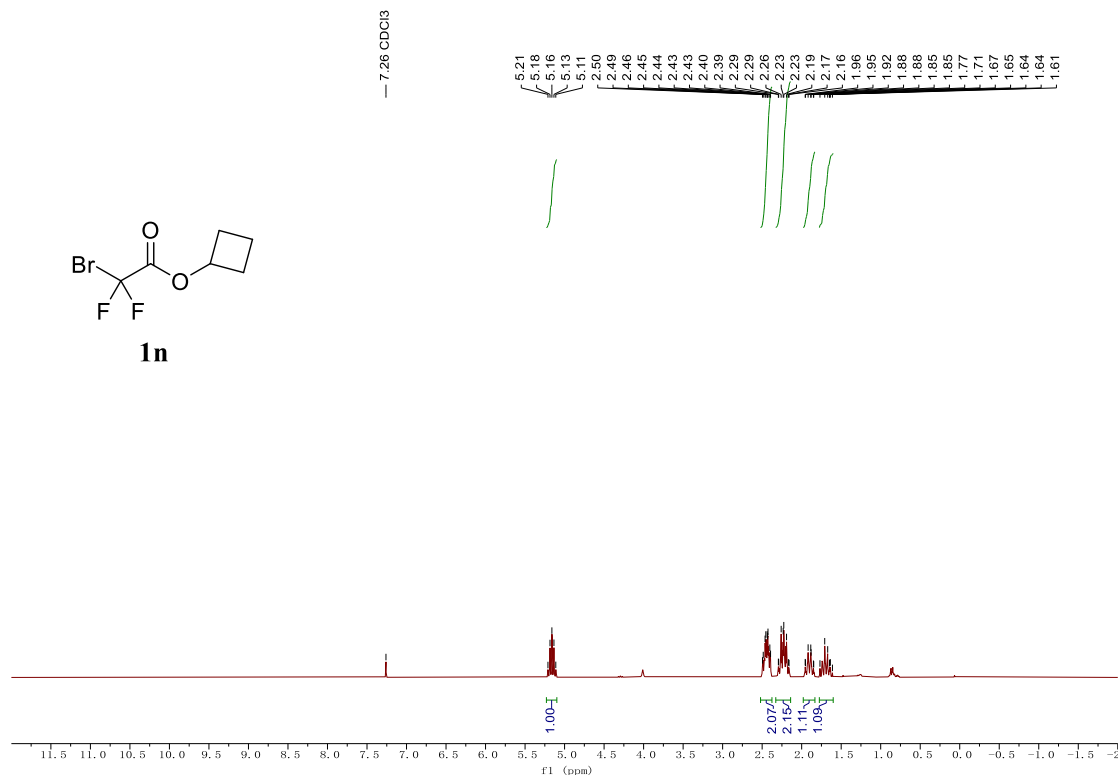

<sup>19</sup>F NMR Spectrum of Compound **1n** (282 MHz, CDCl<sub>3</sub>)

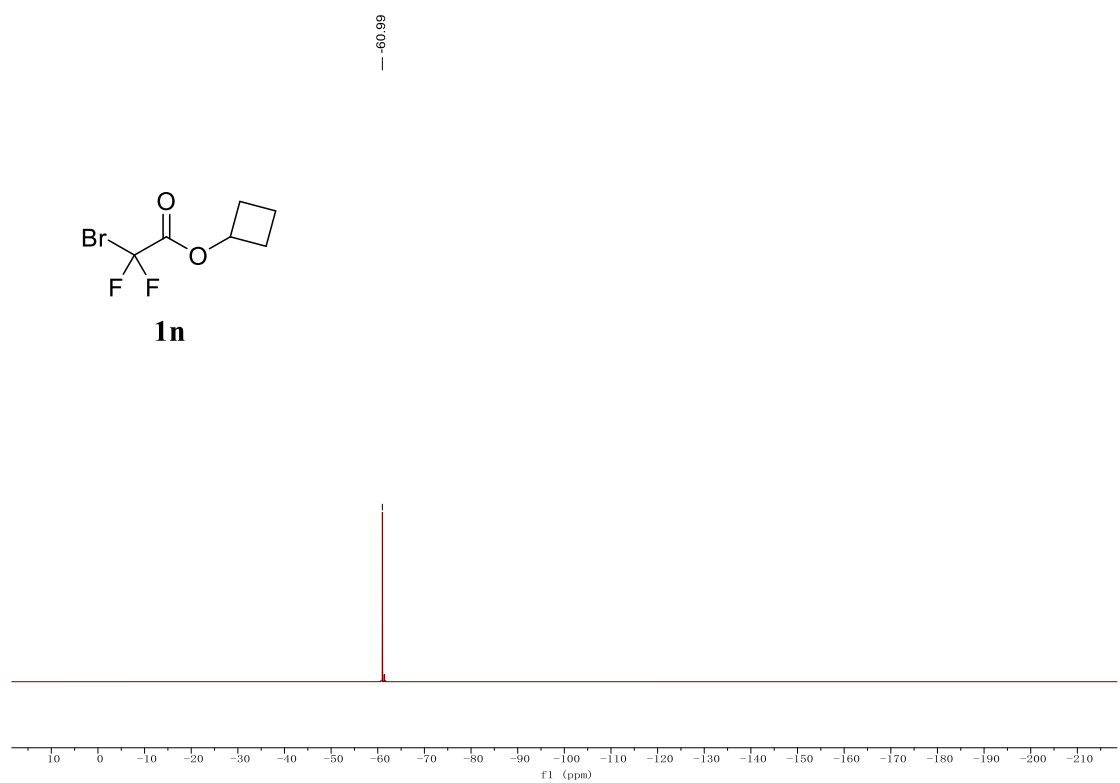

# $^1\text{H}$ NMR Spectrum of Compound **1o** (300 MHz, $\text{CDCl}_3$ )

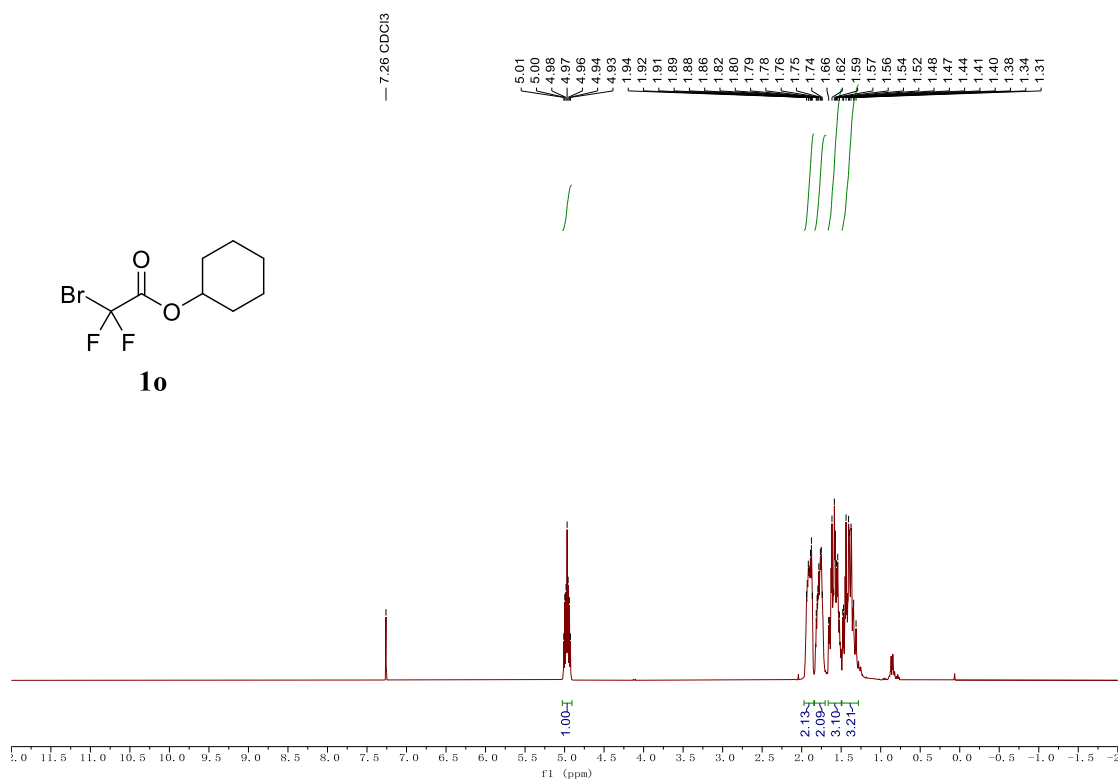

# $^{19}\text{F}$ NMR Spectrum of Compound **1o** (282 MHz, $\text{CDCl}_3$ )

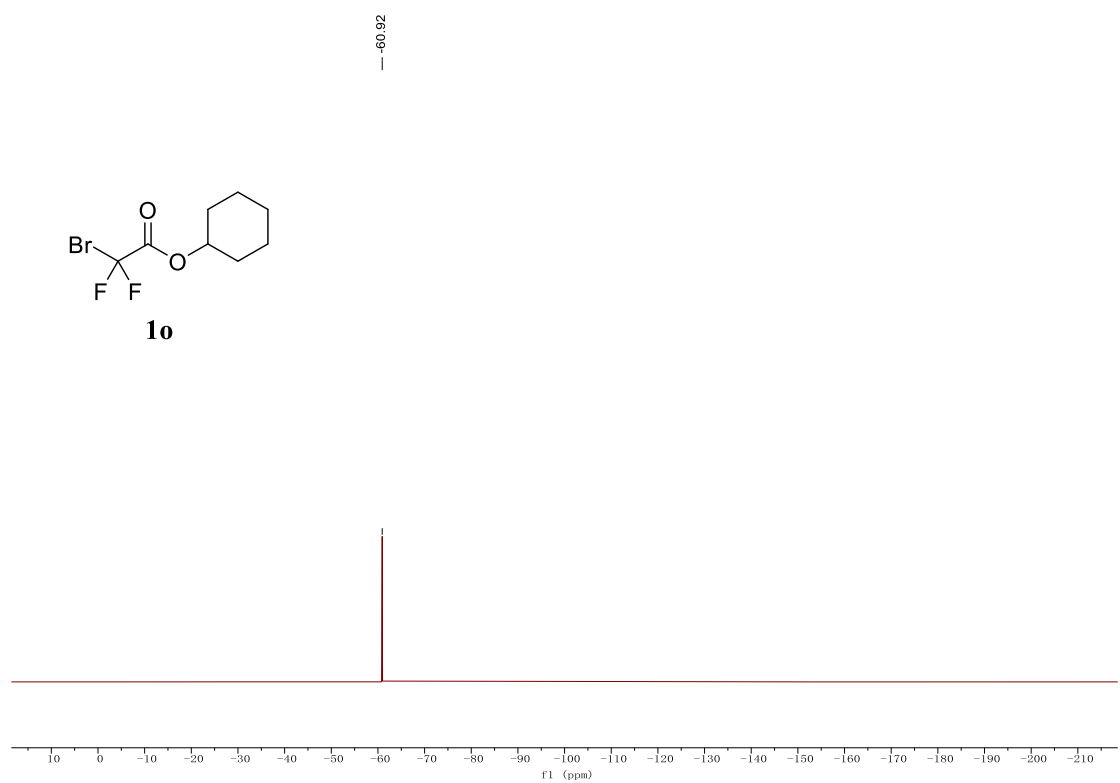

<sup>1</sup>H NMR Spectrum of Compound **1p** (300 MHz, CDCl<sub>3</sub>)

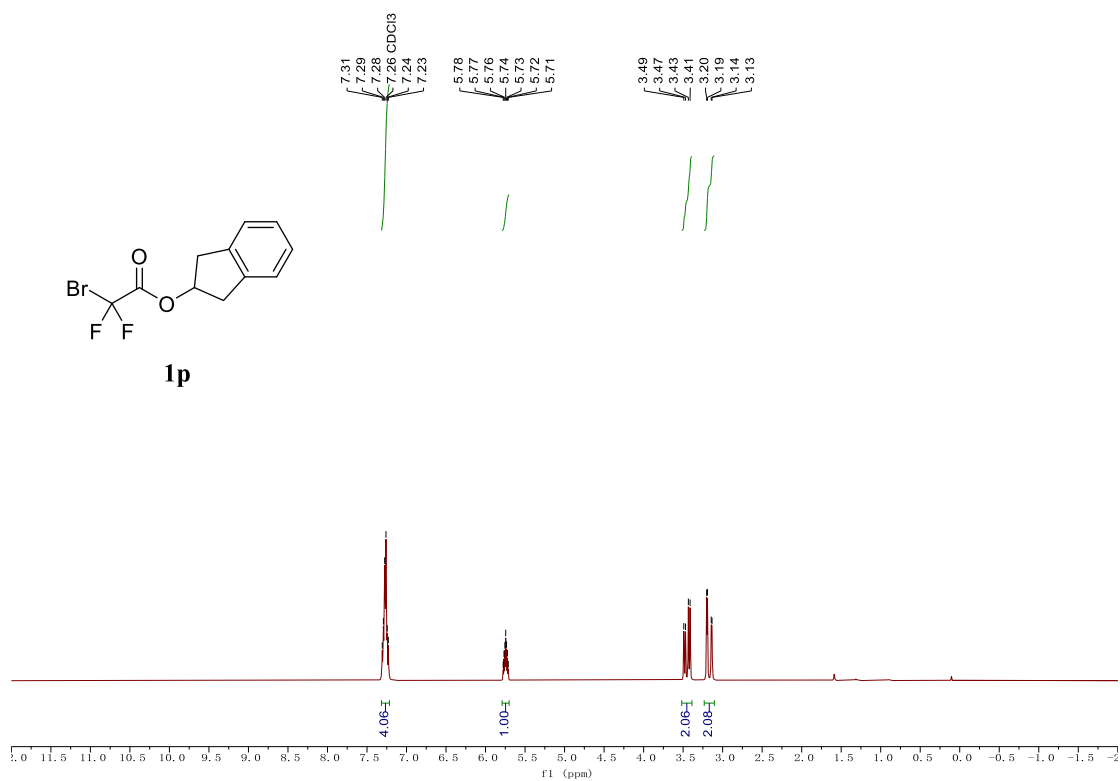

<sup>19</sup>F NMR Spectrum of Compound **1p** (282 MHz, CDCl<sub>3</sub>)

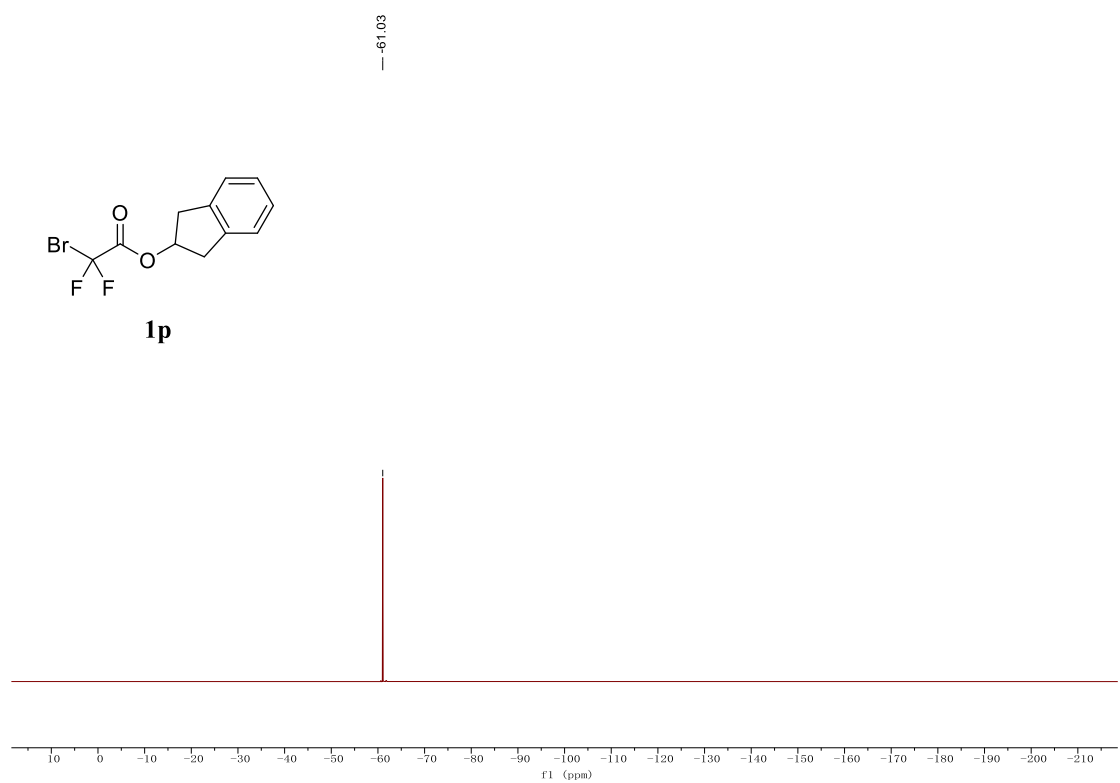

### $^1\text{H}$ NMR Spectrum of Compound **1q** (300 MHz, $\text{CDCl}_3$ )

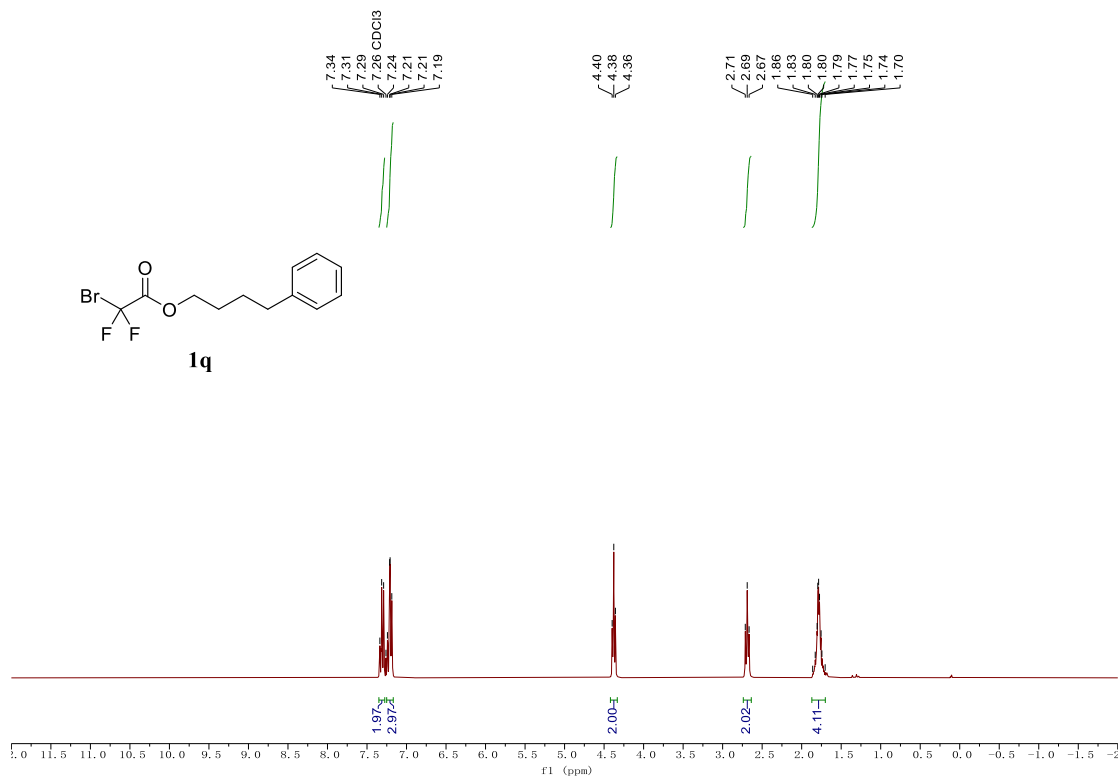

### $^{19}\text{F}$ NMR Spectrum of Compound **1q** (282 MHz, $\text{CDCl}_3$ )

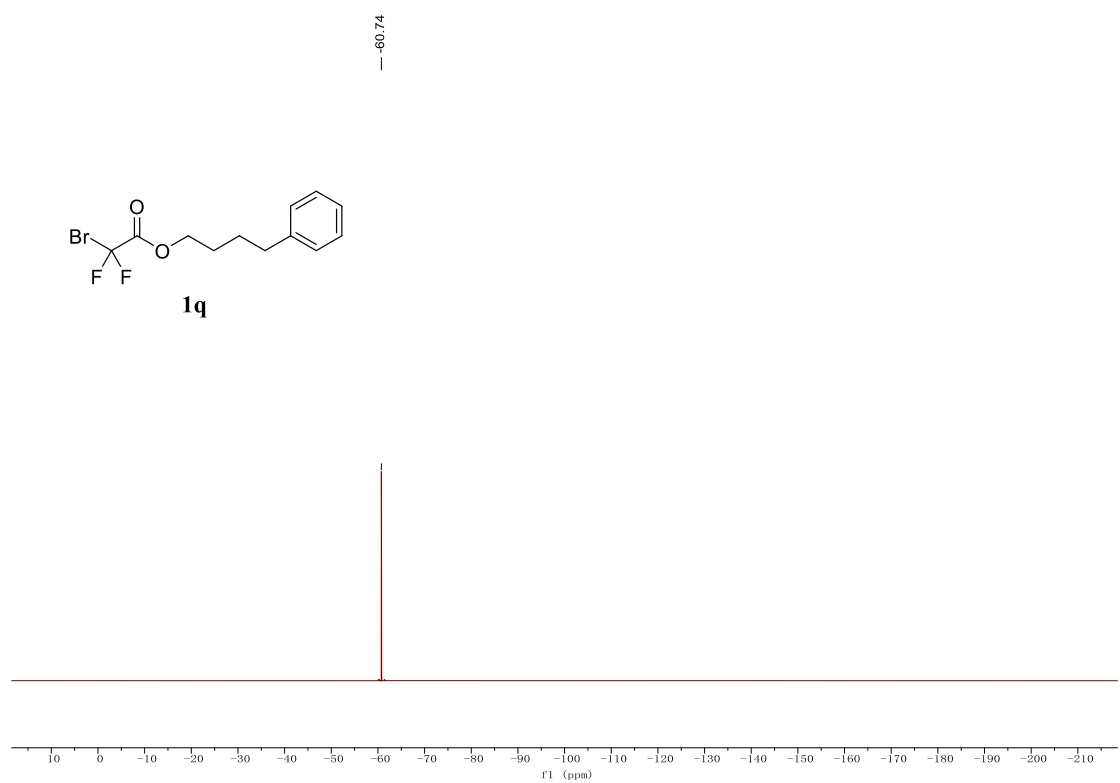



# $^1\text{H}$ NMR Spectrum of Compound **1r** (300 MHz, $\text{CDCl}_3$ )

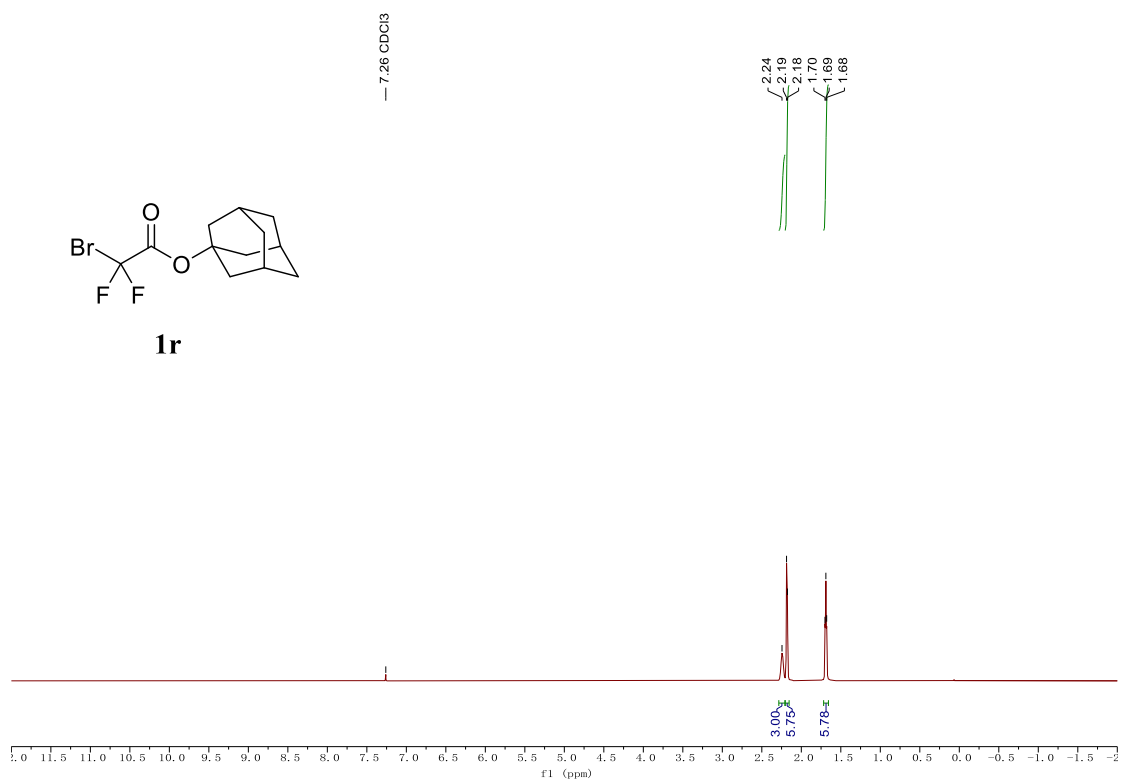

# $^{19}\text{F}$ NMR Spectrum of Compound **1r** (282 MHz, $\text{CDCl}_3$ )

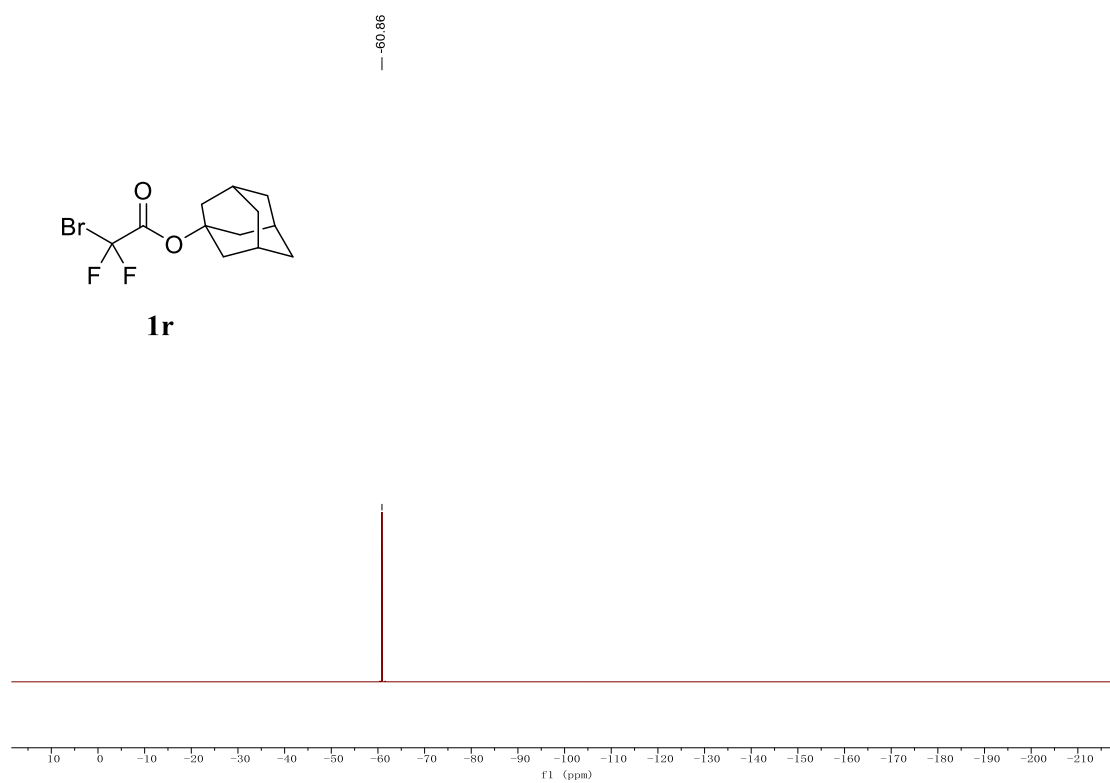

<sup>1</sup>H NMR Spectrum of Compound **1s** (300 MHz, CDCl<sub>3</sub>)

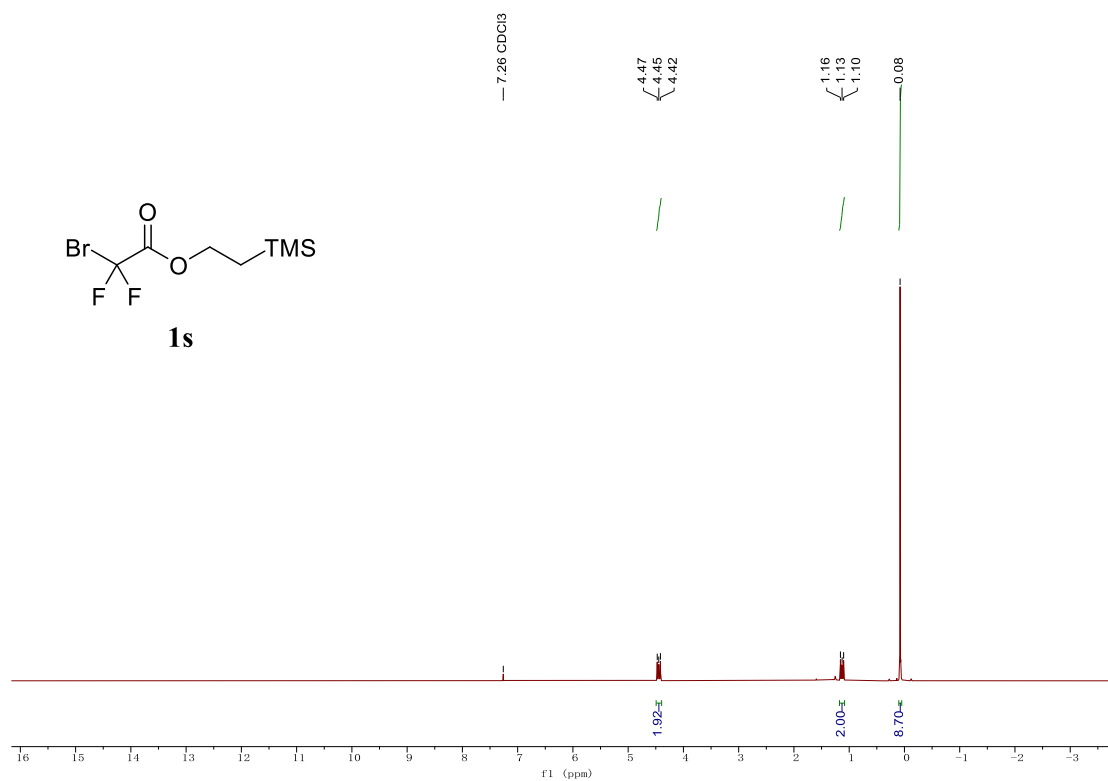

<sup>19</sup>F NMR Spectrum of Compound **1s** (282 MHz, CDCl<sub>3</sub>)

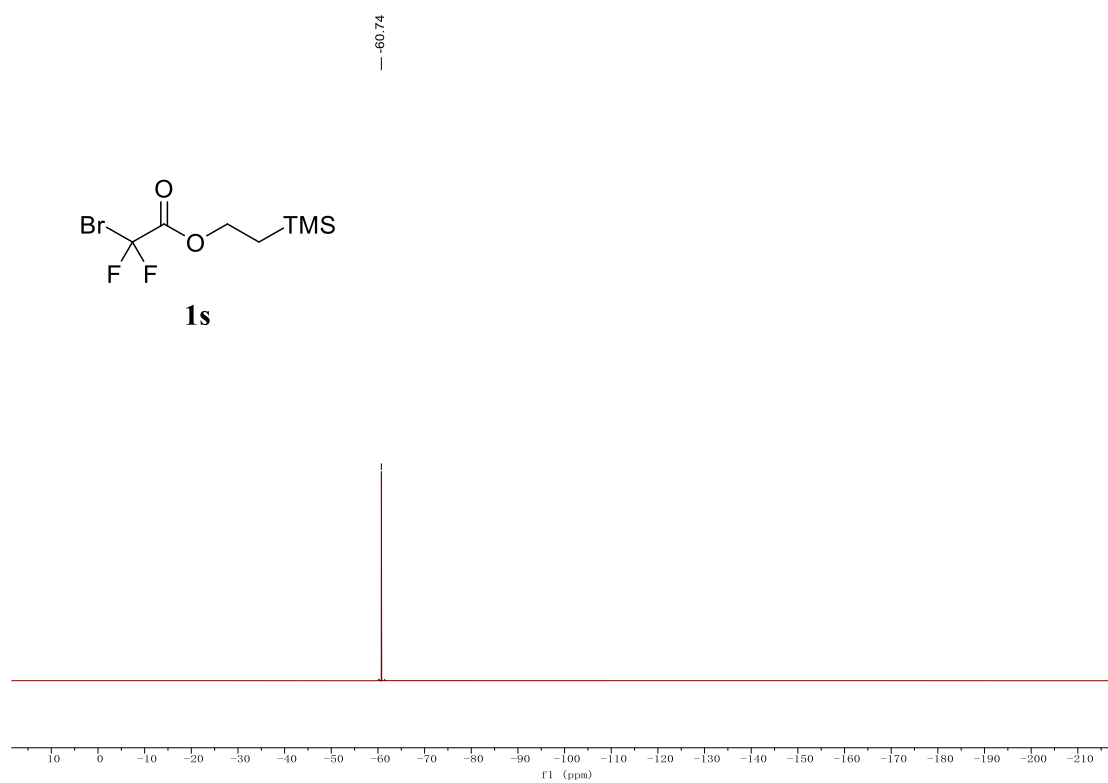

# $^1\text{H}$ NMR Spectrum of Compound **1t** (300 MHz, $\text{CDCl}_3$ )

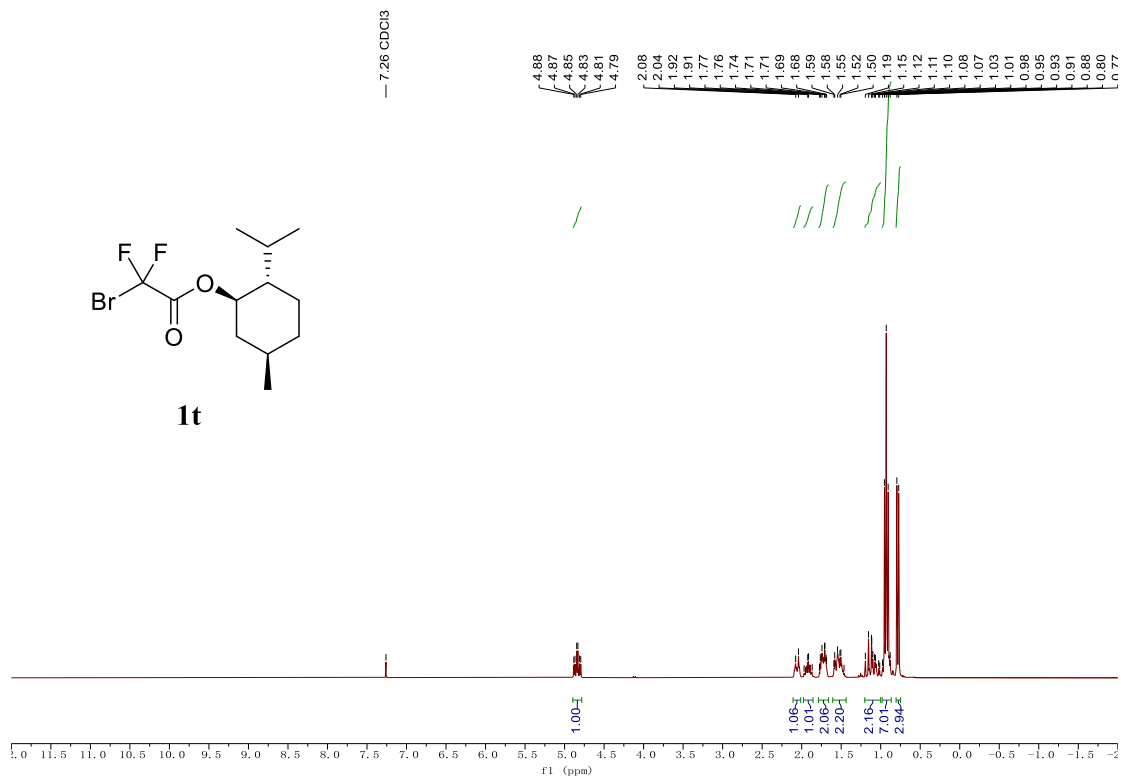

# $^{19}\text{F}$ NMR Spectrum of Compound **1t** (282 MHz, $\text{CDCl}_3$ )

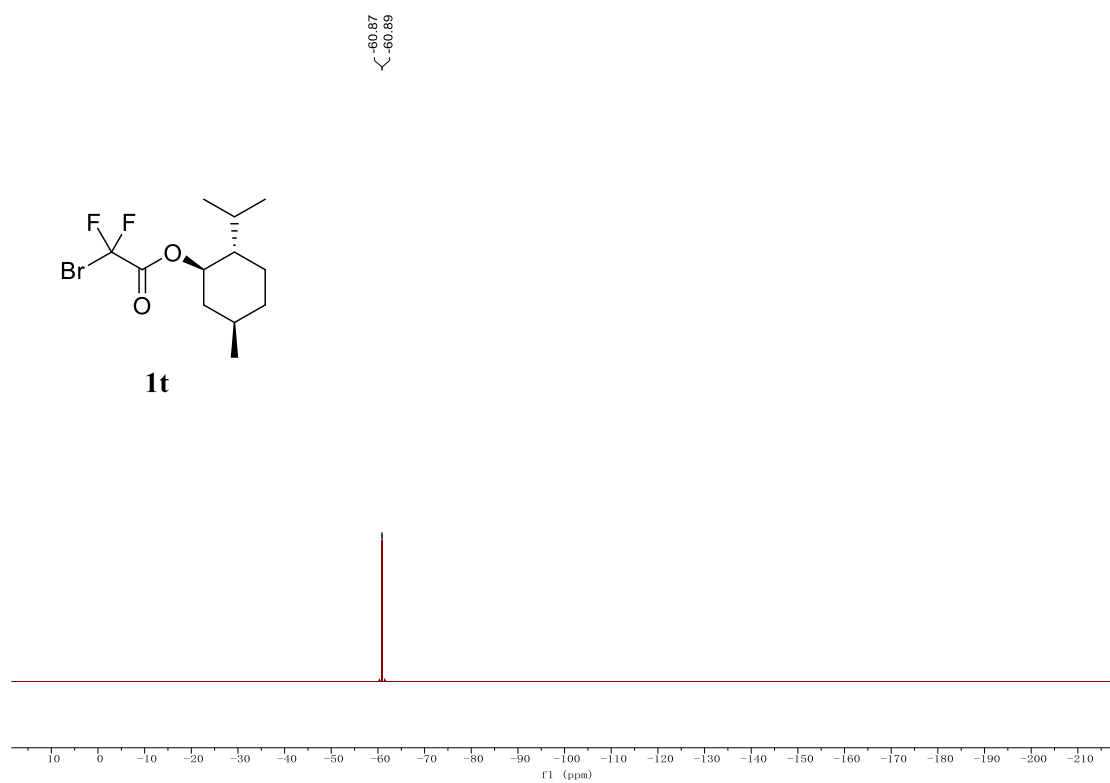

<sup>1</sup>H NMR Spectrum of Compound **1u** (300 MHz, CDCl<sub>3</sub>)

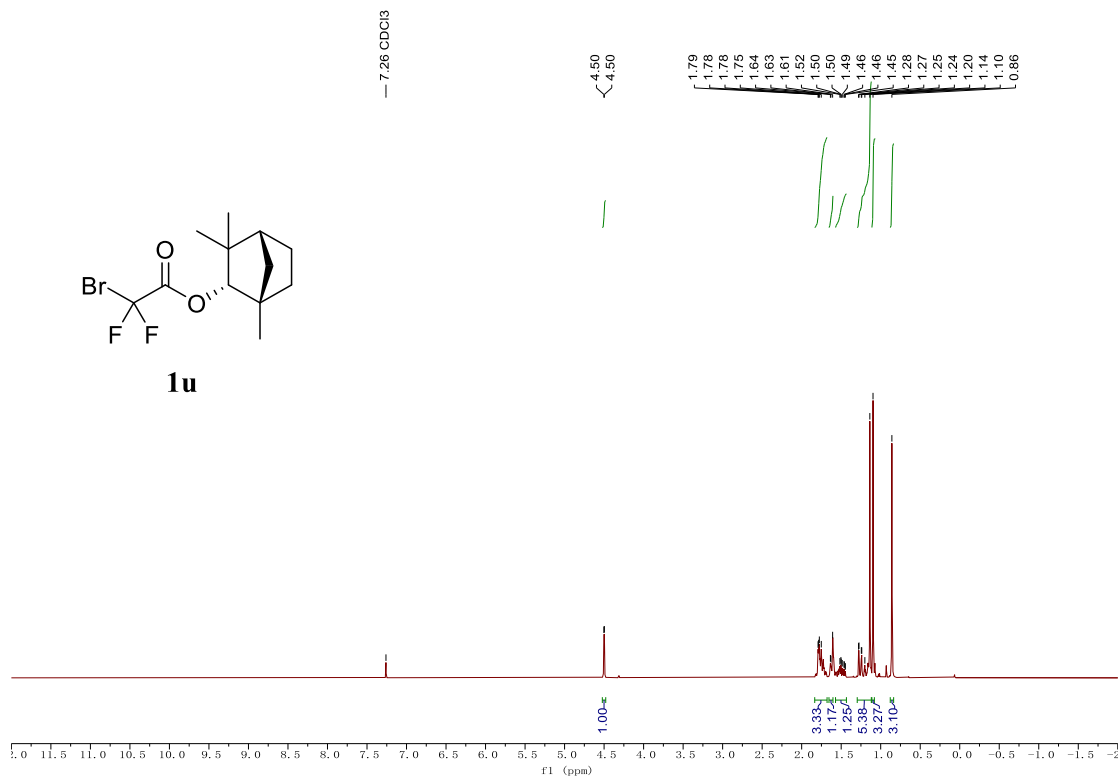

<sup>19</sup>F NMR Spectrum of Compound **1u** (282 MHz, CDCl<sub>3</sub>)

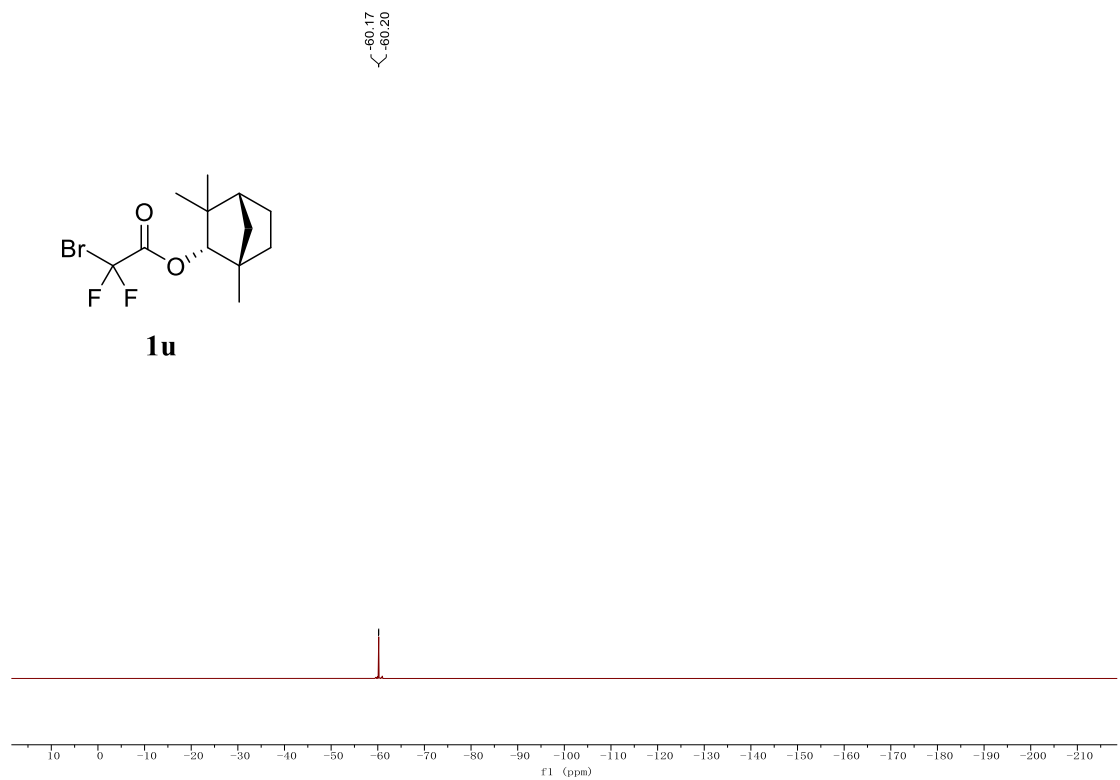

# <sup>1</sup>H NMR Spectrum of Compound **1v** (300 MHz, CDCl<sub>3</sub>)

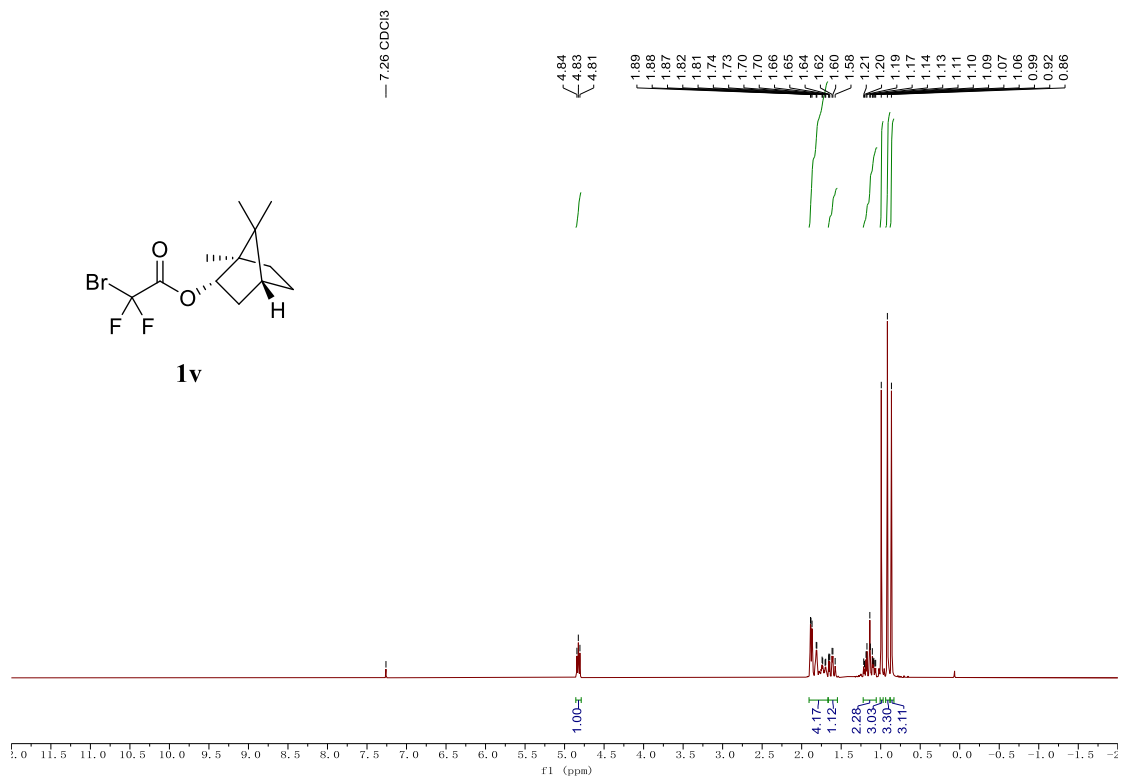

# <sup>19</sup>F NMR Spectrum of Compound **1v** (282 MHz, CDCl<sub>3</sub>)

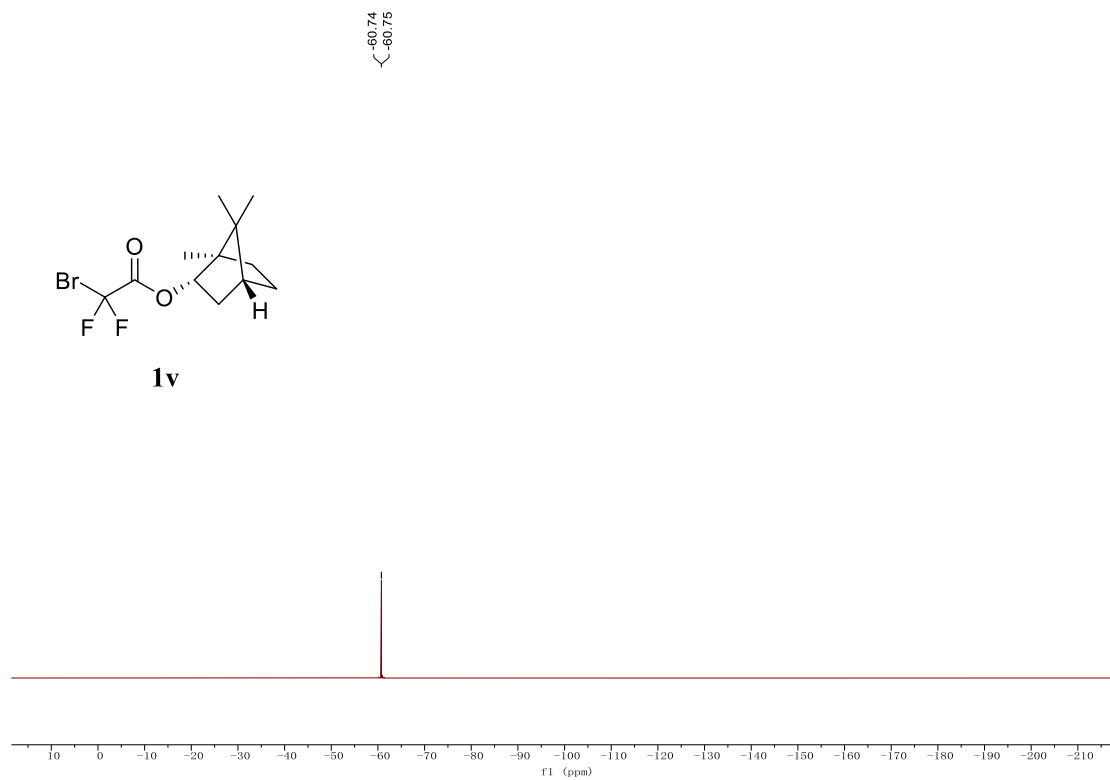

$^1\text{H}$  NMR Spectrum of Compound **1w** (300 MHz,  $\text{CDCl}_3$ )

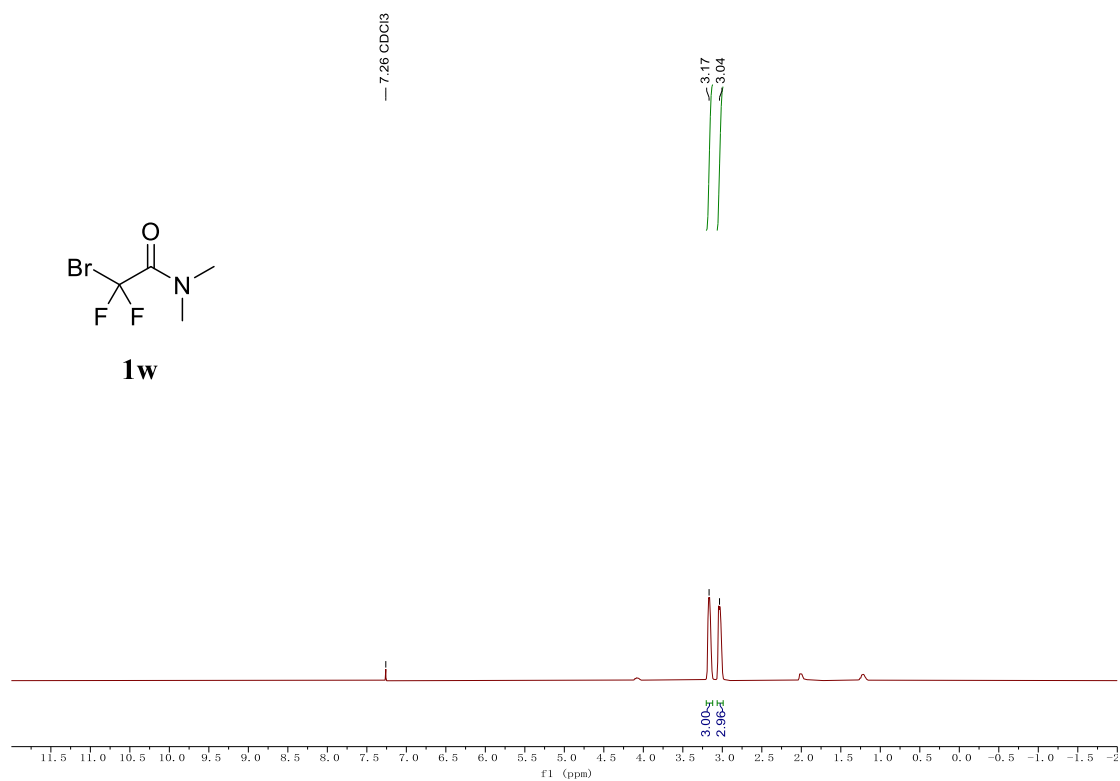

$^{19}\text{F}$  NMR Spectrum of Compound **1w** (282 MHz,  $\text{CDCl}_3$ )

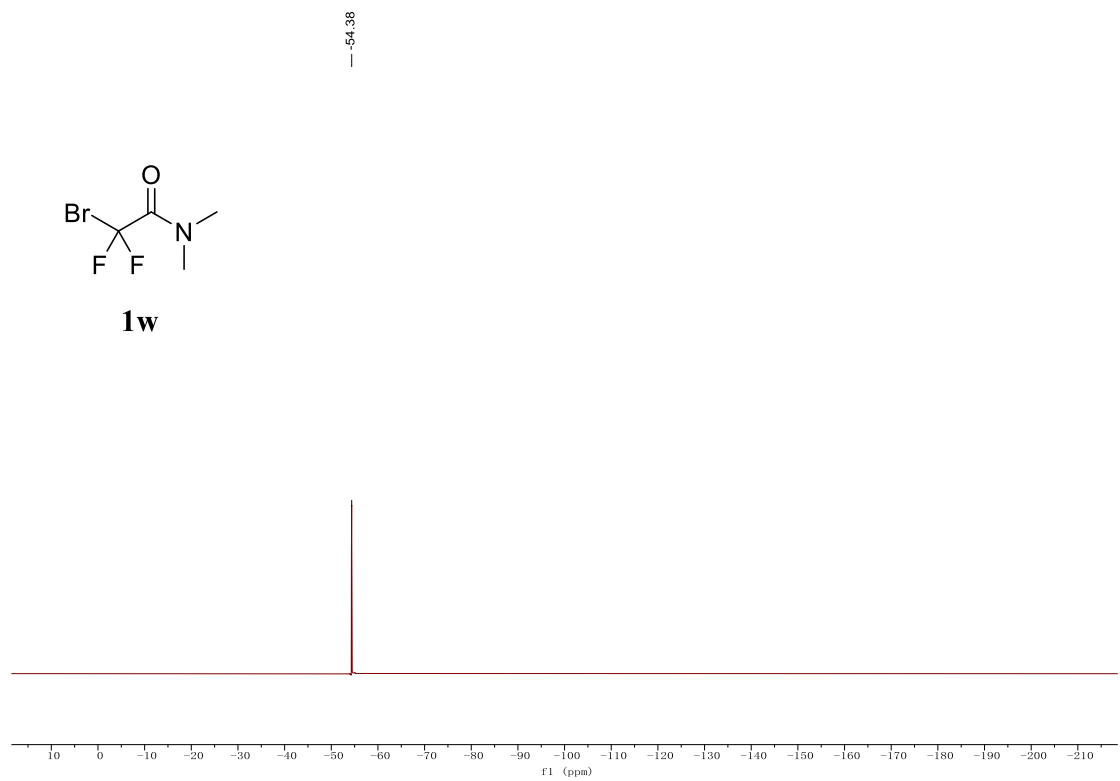

# $^1\text{H}$ NMR Spectrum of Compound **1x** (300 MHz, $\text{CDCl}_3$ )

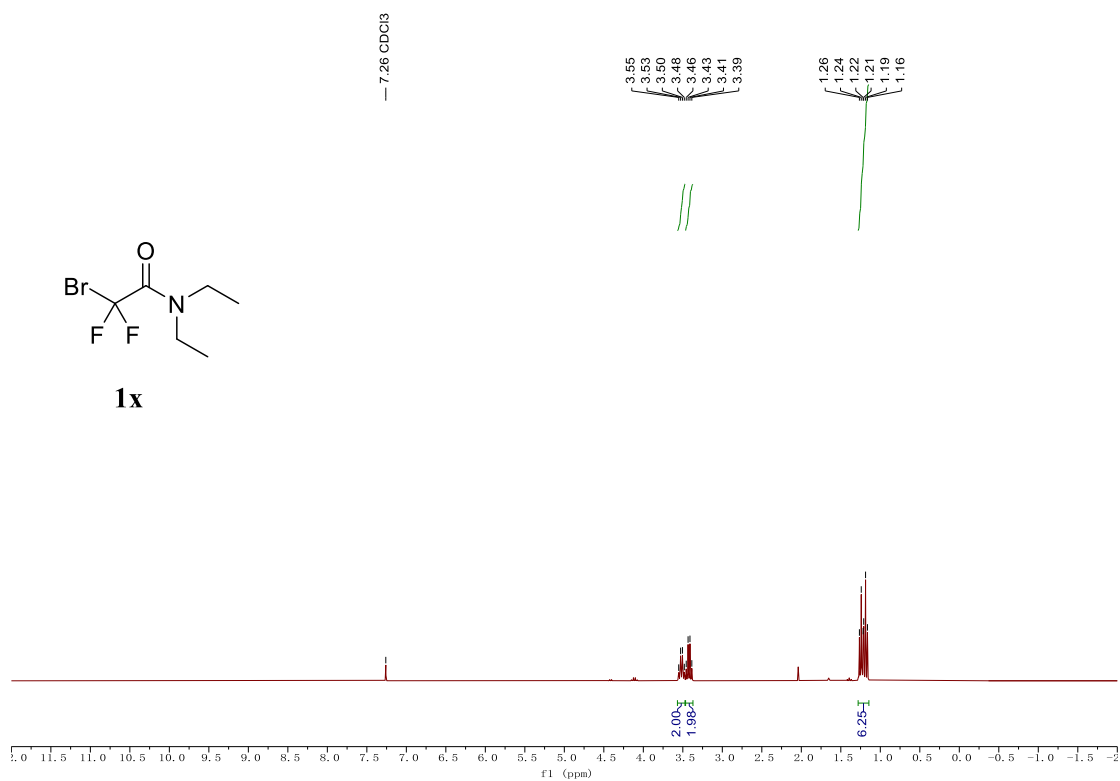

# $^{19}\text{F}$ NMR Spectrum of Compound **1x** (282 MHz, $\text{CDCl}_3$ )

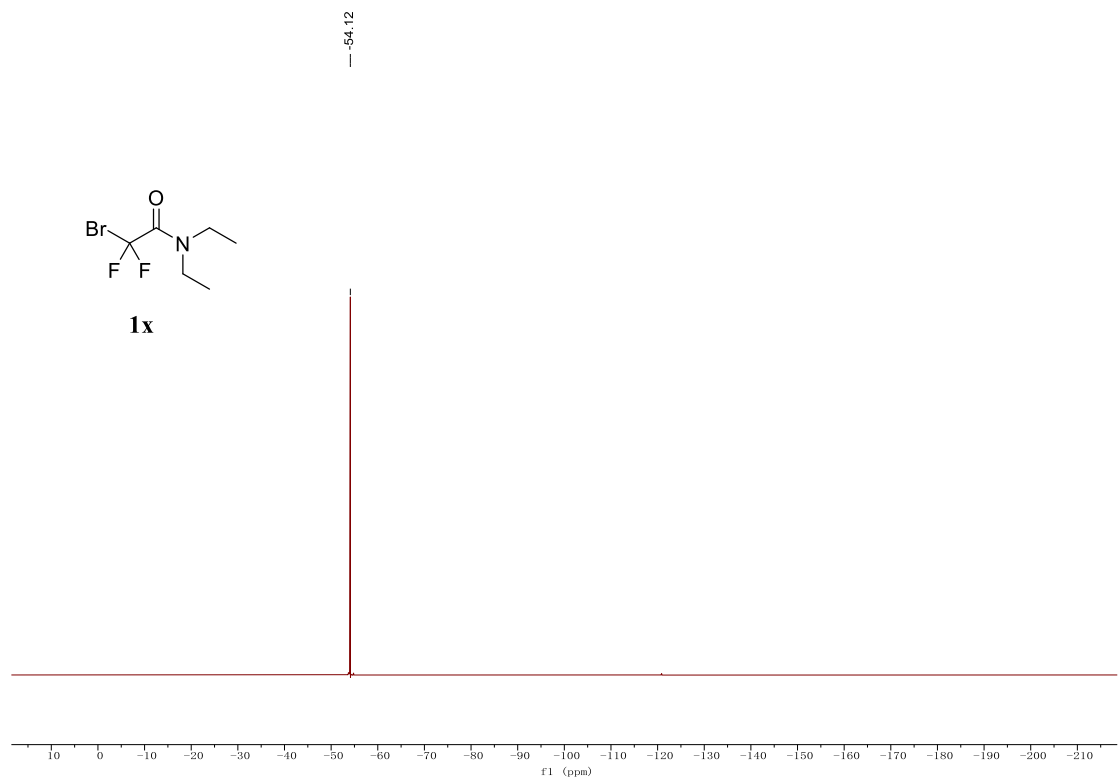

<sup>1</sup>H NMR Spectrum of Compound **1y** (300 MHz, CDCl<sub>3</sub>)

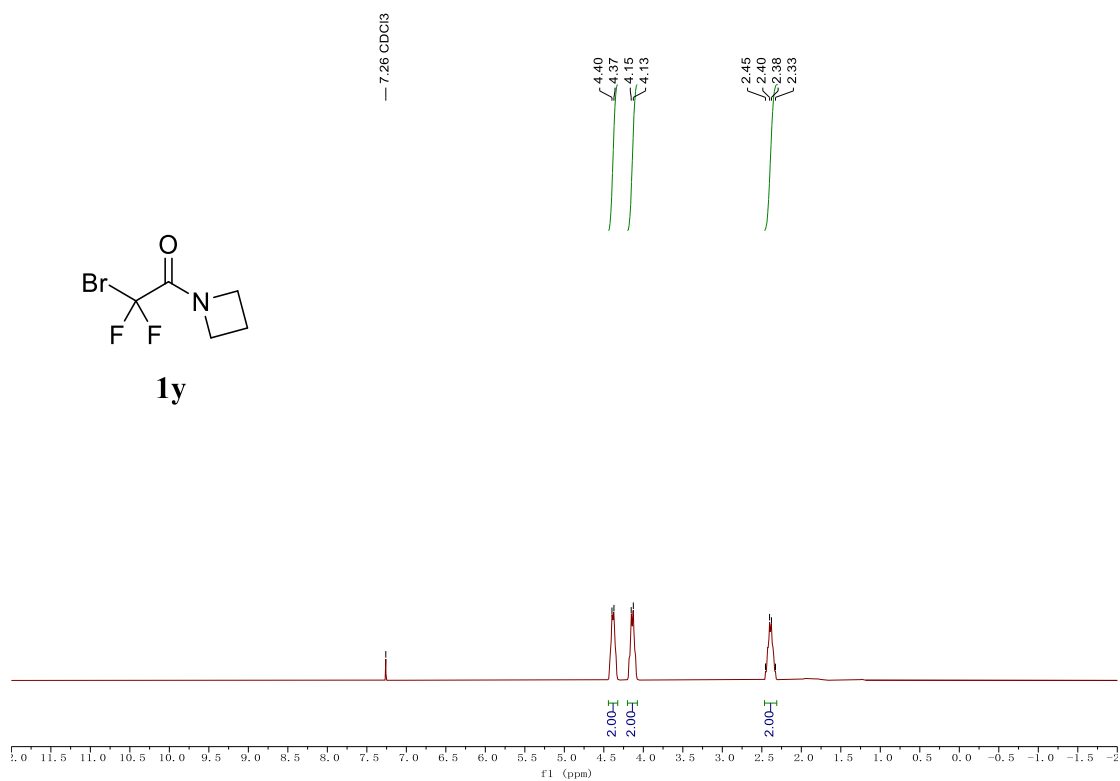

<sup>19</sup>F NMR Spectrum of Compound **1y** (282 MHz, CDCl<sub>3</sub>)

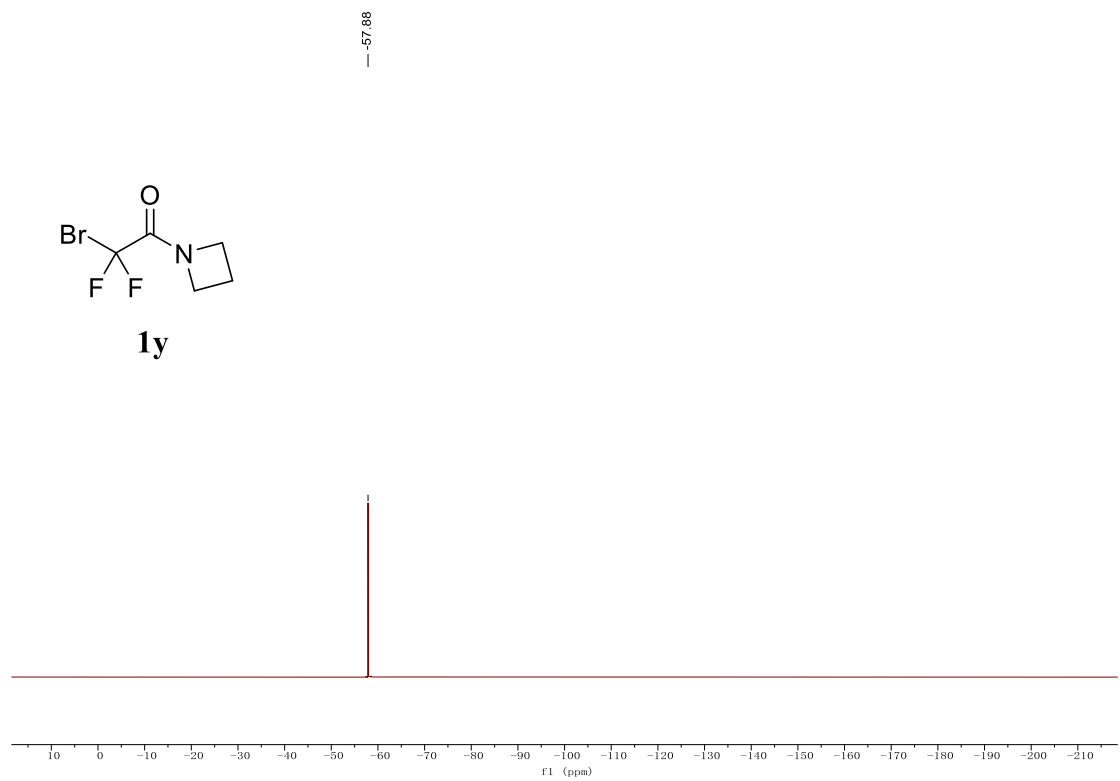



$^1\text{H}$  NMR Spectrum of Compound **1z** (300 MHz,  $\text{CDCl}_3$ )

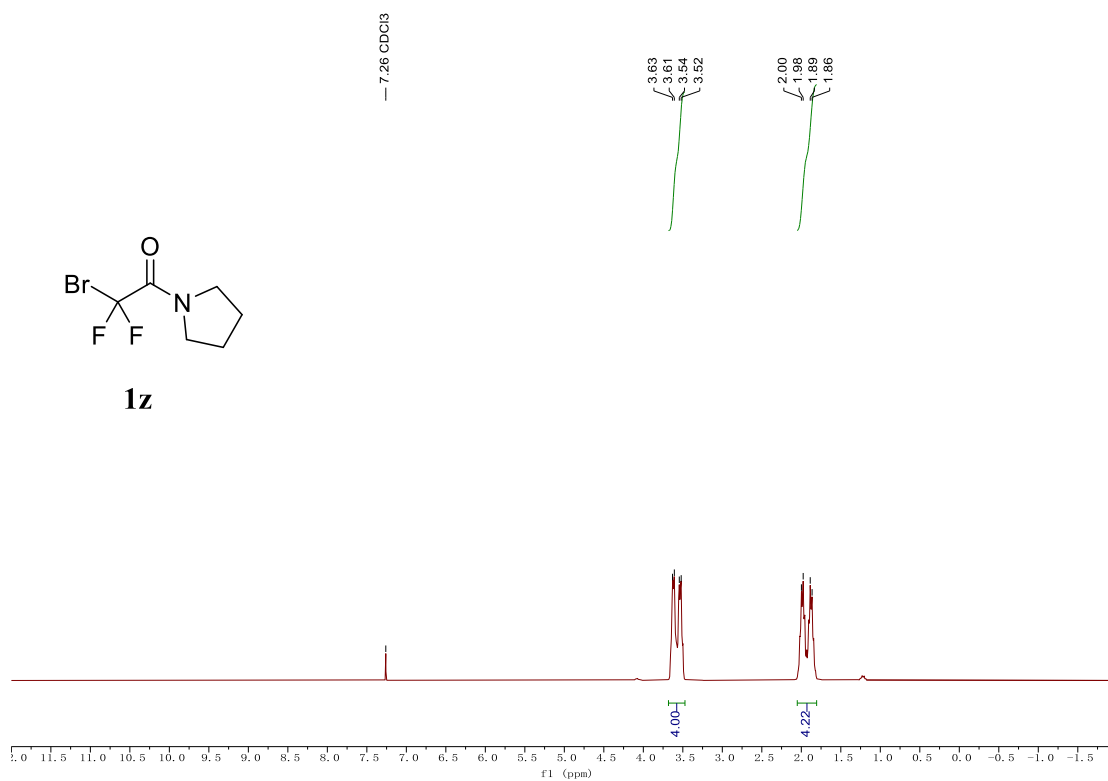

$^{19}\text{F}$  NMR Spectrum of Compound **1z** (282 MHz,  $\text{CDCl}_3$ )

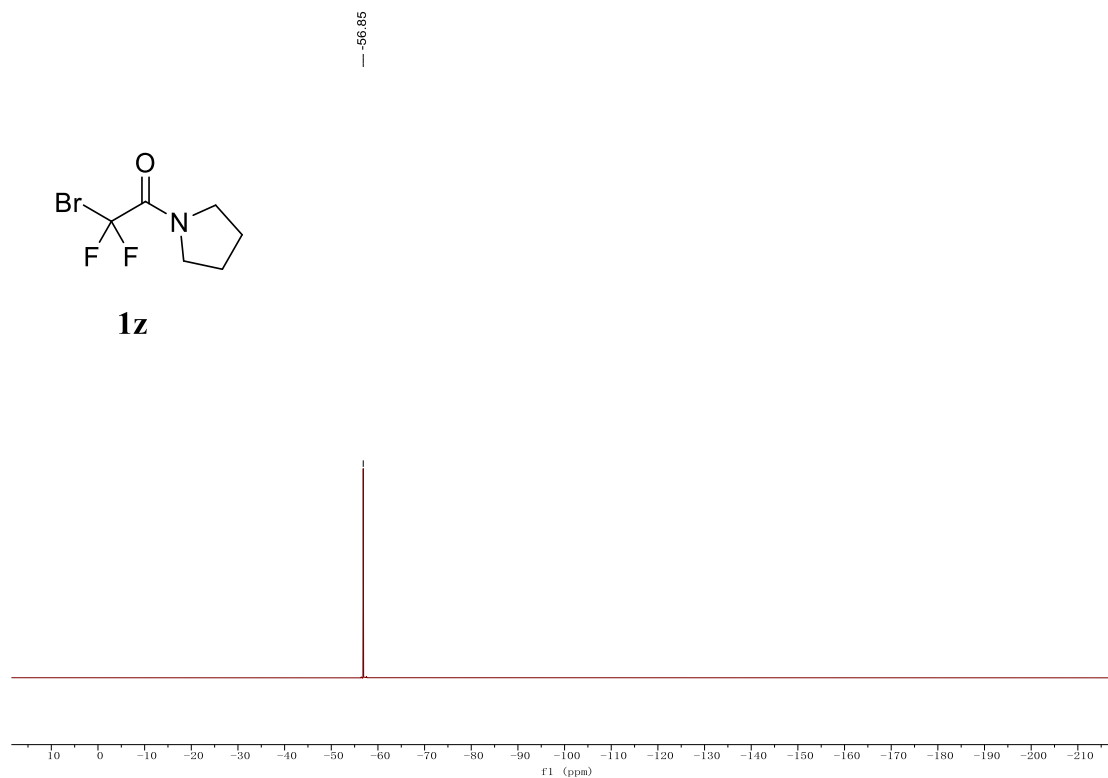

$^1\text{H}$  NMR Spectrum of Compound **2b** (300 MHz,  $\text{CDCl}_3$ )

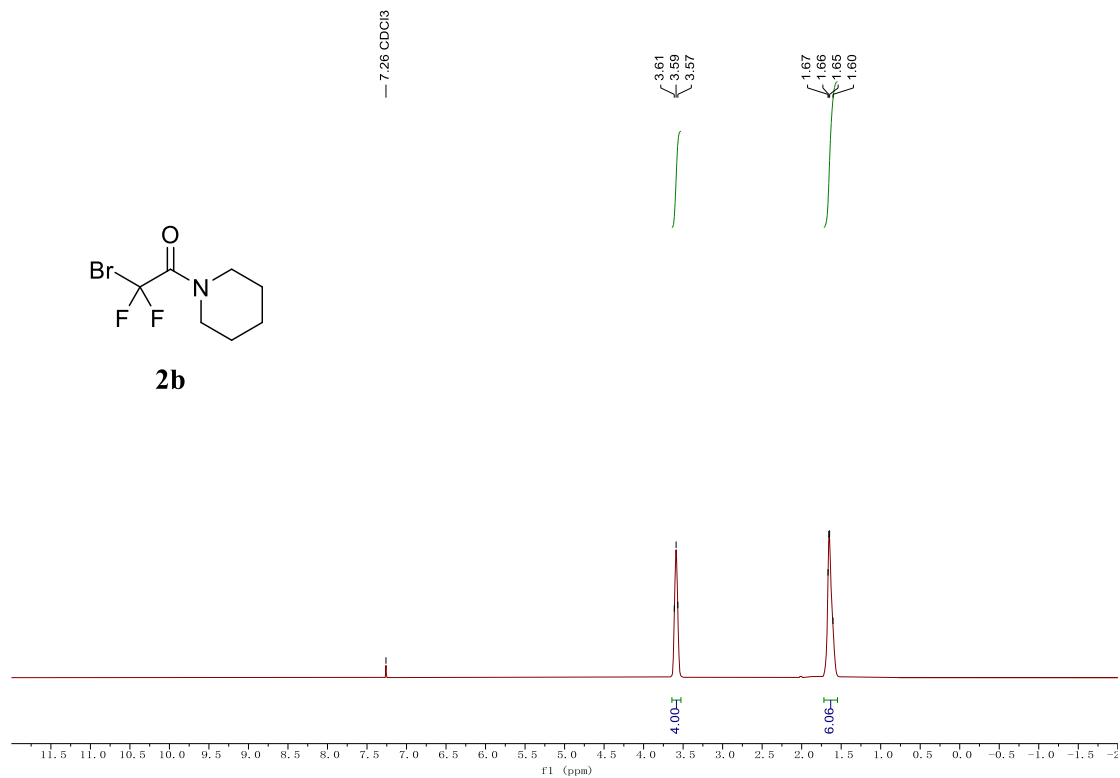

$^{19}\text{F}$  NMR Spectrum of Compound **2b** (282 MHz,  $\text{CDCl}_3$ )

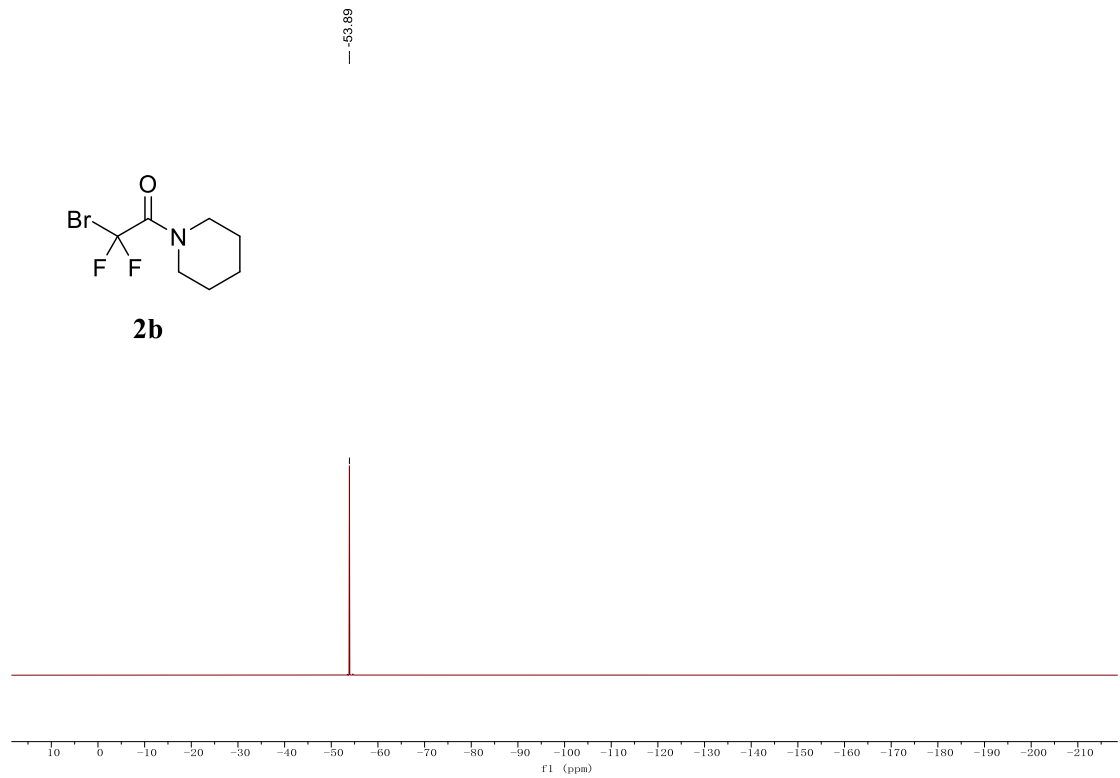

$^1\text{H}$  NMR Spectrum of Compound **2c** (300 MHz,  $\text{CDCl}_3$ )

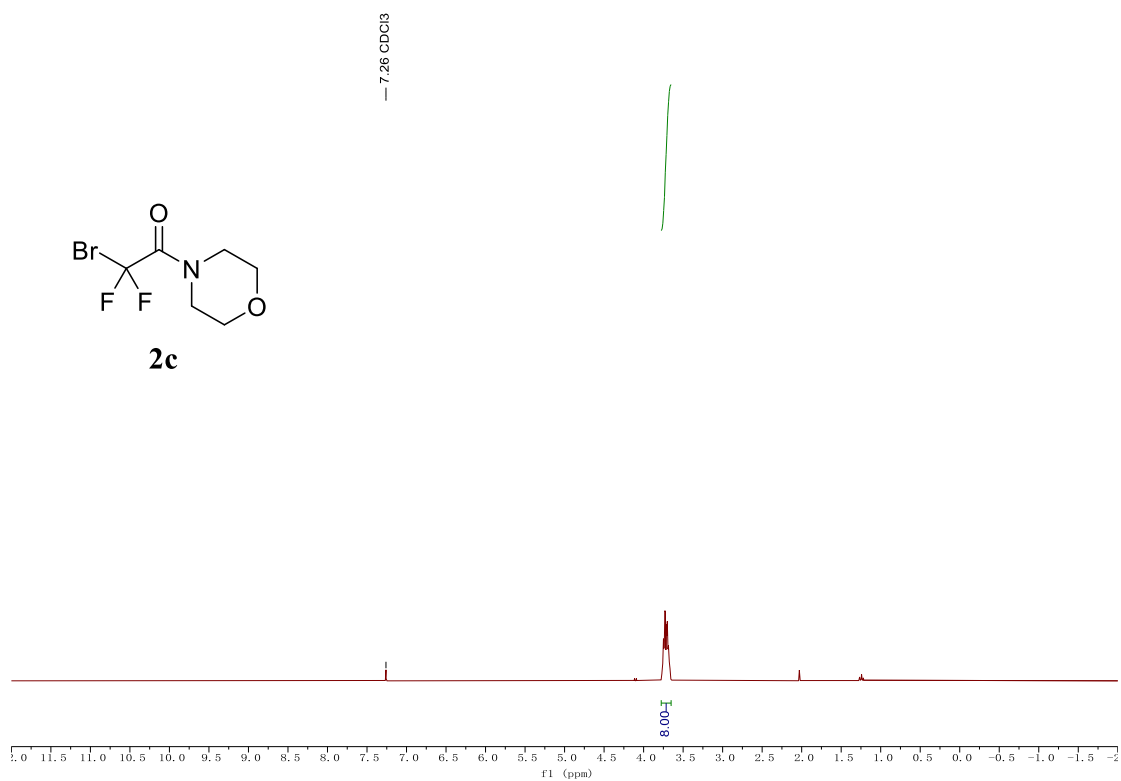

$^{19}\text{F}$  NMR Spectrum of Compound **2c** (282 MHz,  $\text{CDCl}_3$ )

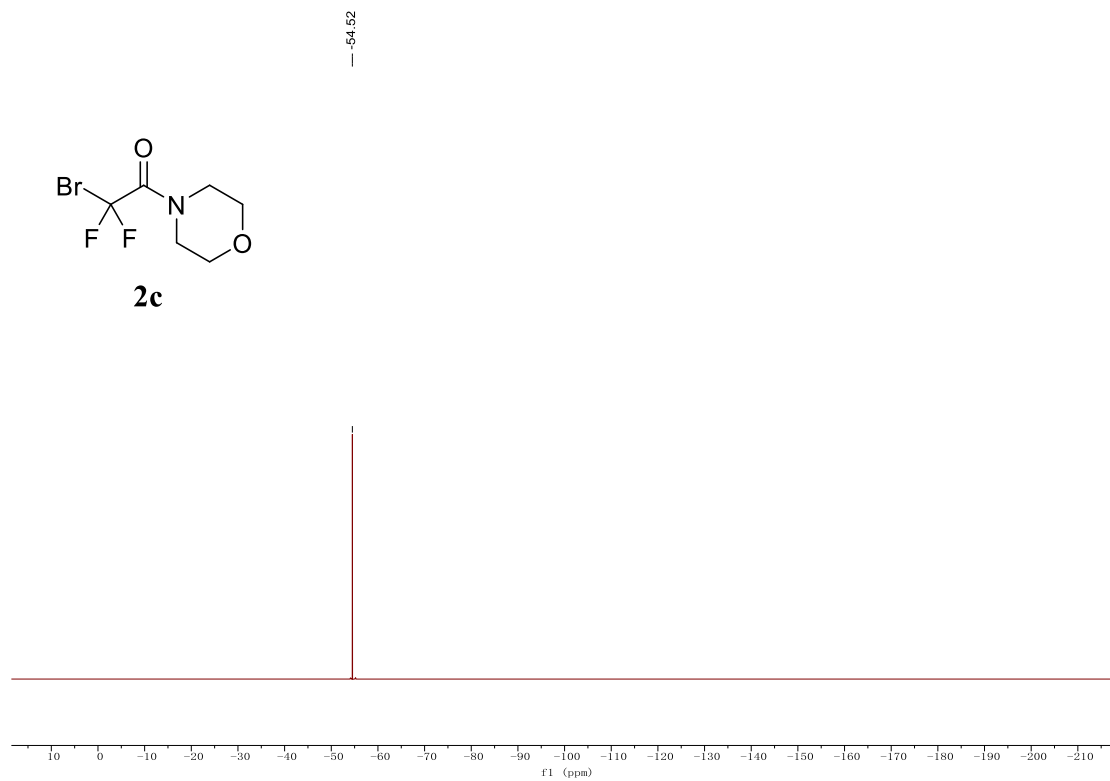

<sup>1</sup>H NMR Spectrum of Compound **2d** (300 MHz, CDCl<sub>3</sub>)

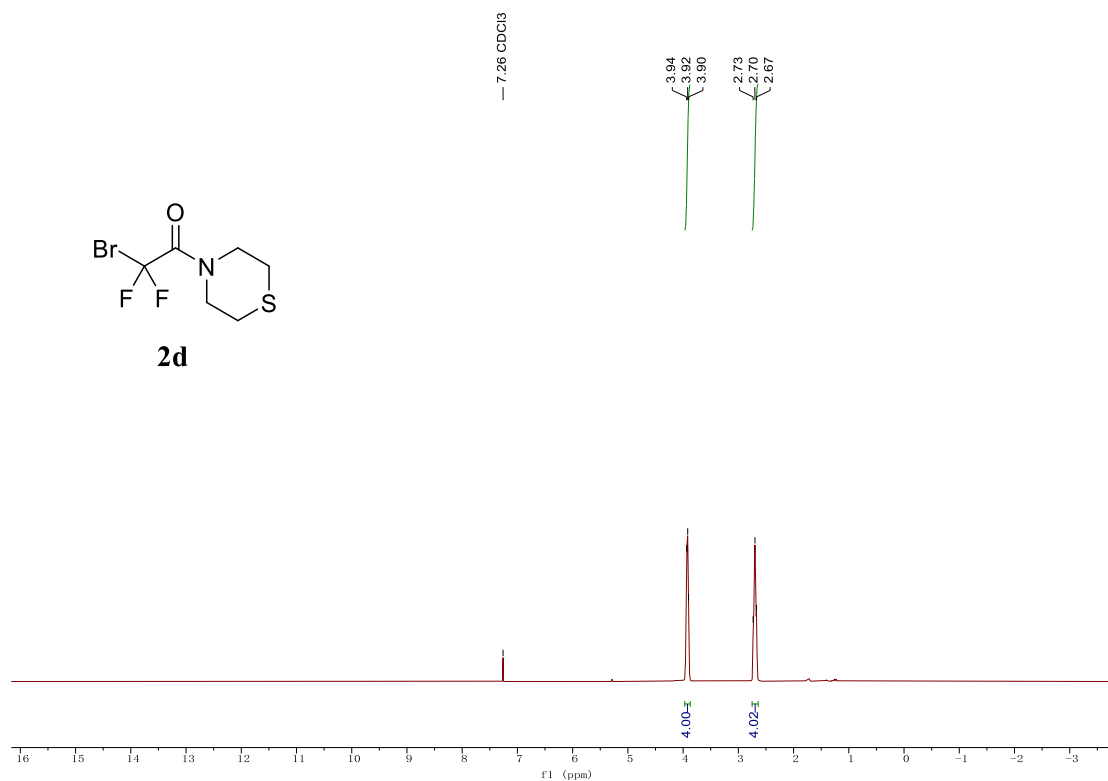

<sup>19</sup>F NMR Spectrum of Compound **2d** (282 MHz, CDCl<sub>3</sub>)

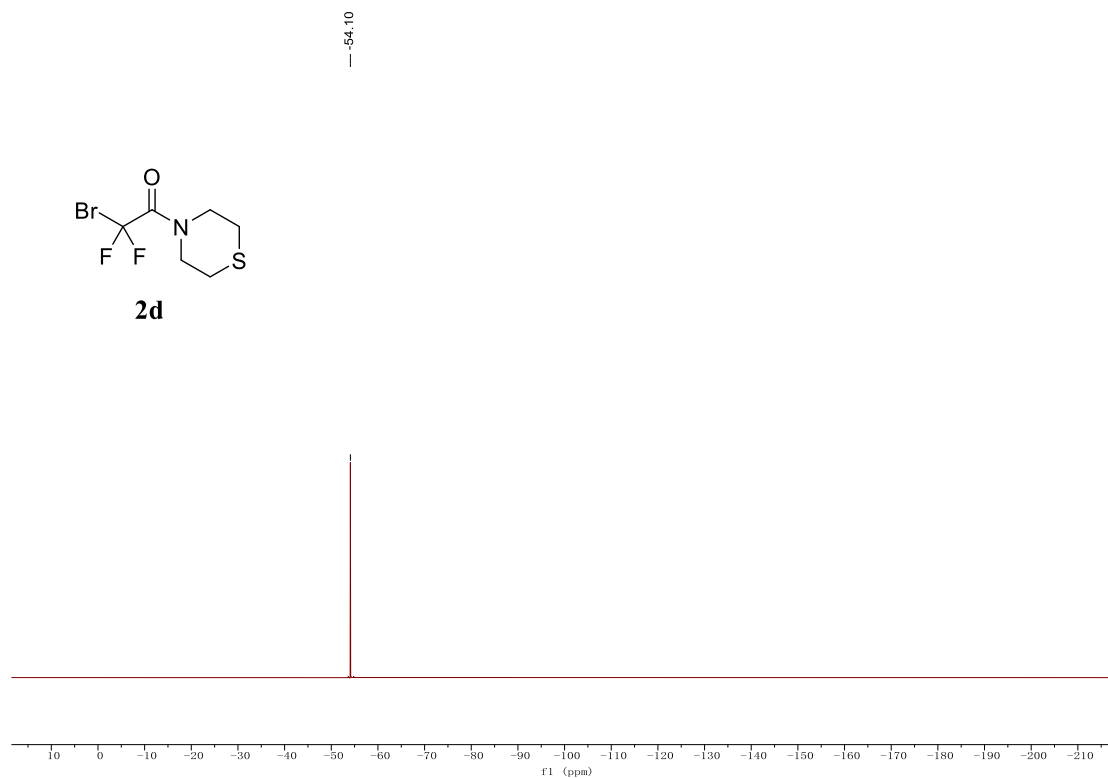

<sup>1</sup>H NMR Spectrum of Compound **2e** (300 MHz, CDCl<sub>3</sub>)

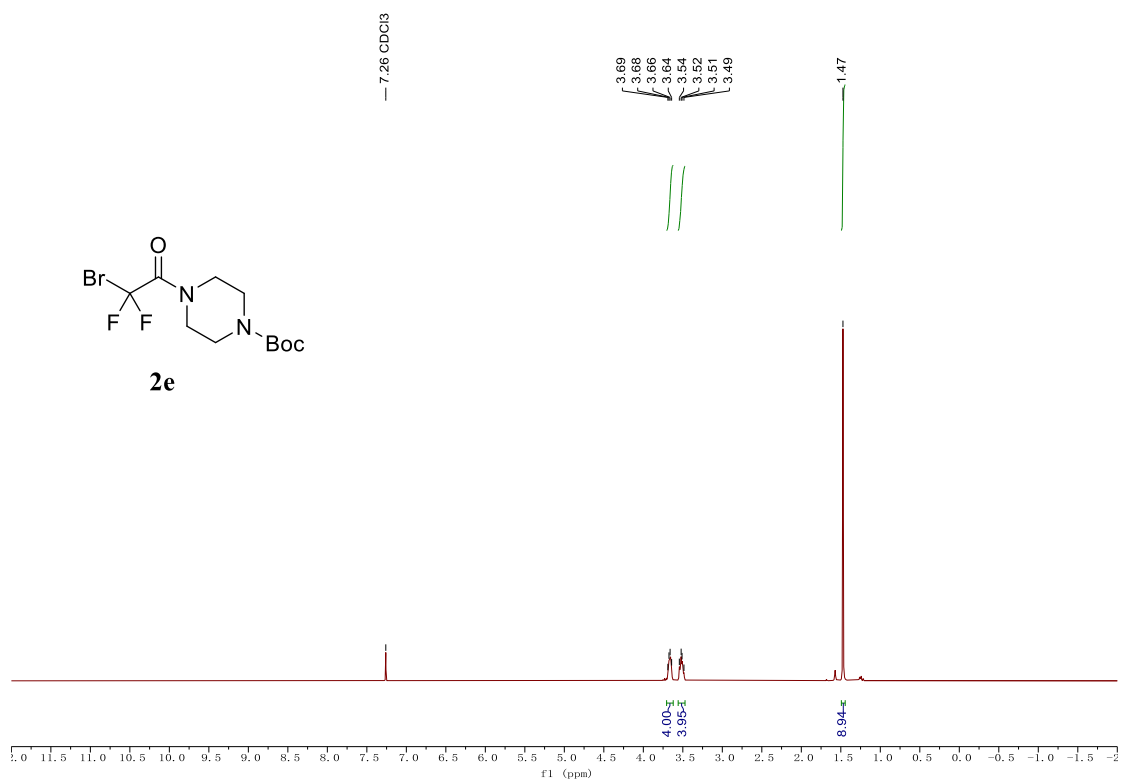

<sup>19</sup>F NMR Spectrum of Compound **2e** (282 MHz, CDCl<sub>3</sub>)

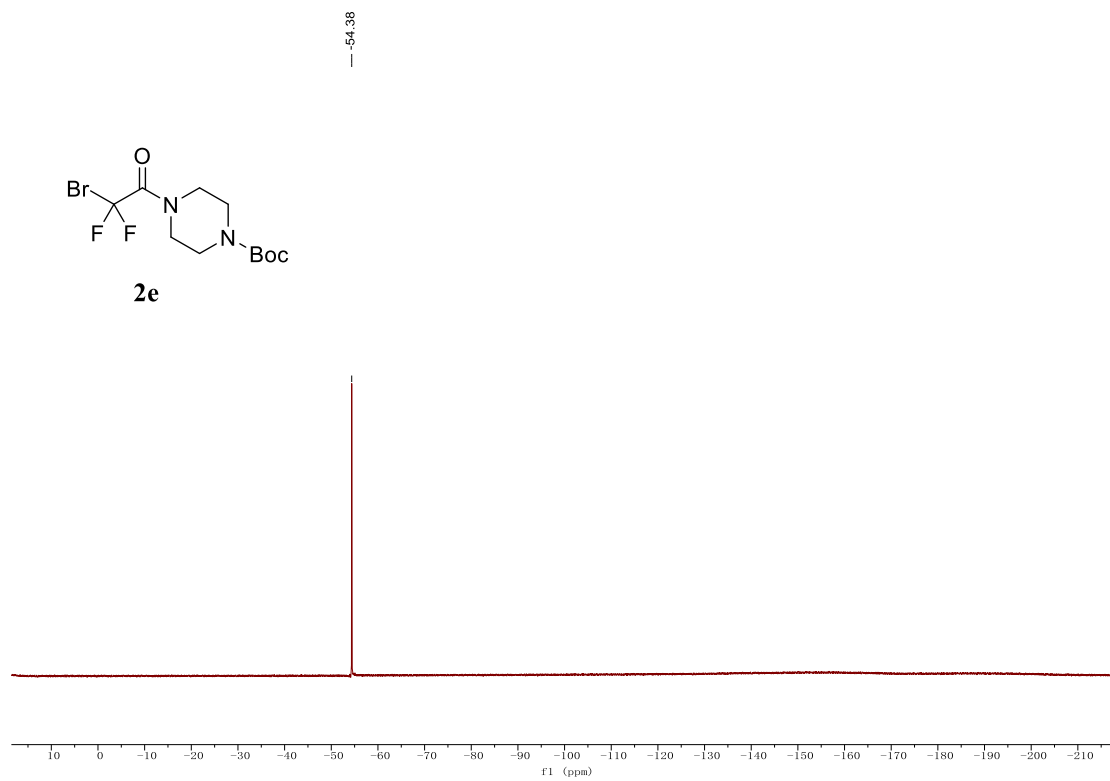

$^1\text{H}$  NMR Spectrum of Compound **2f** (300 MHz,  $\text{CDCl}_3$ )

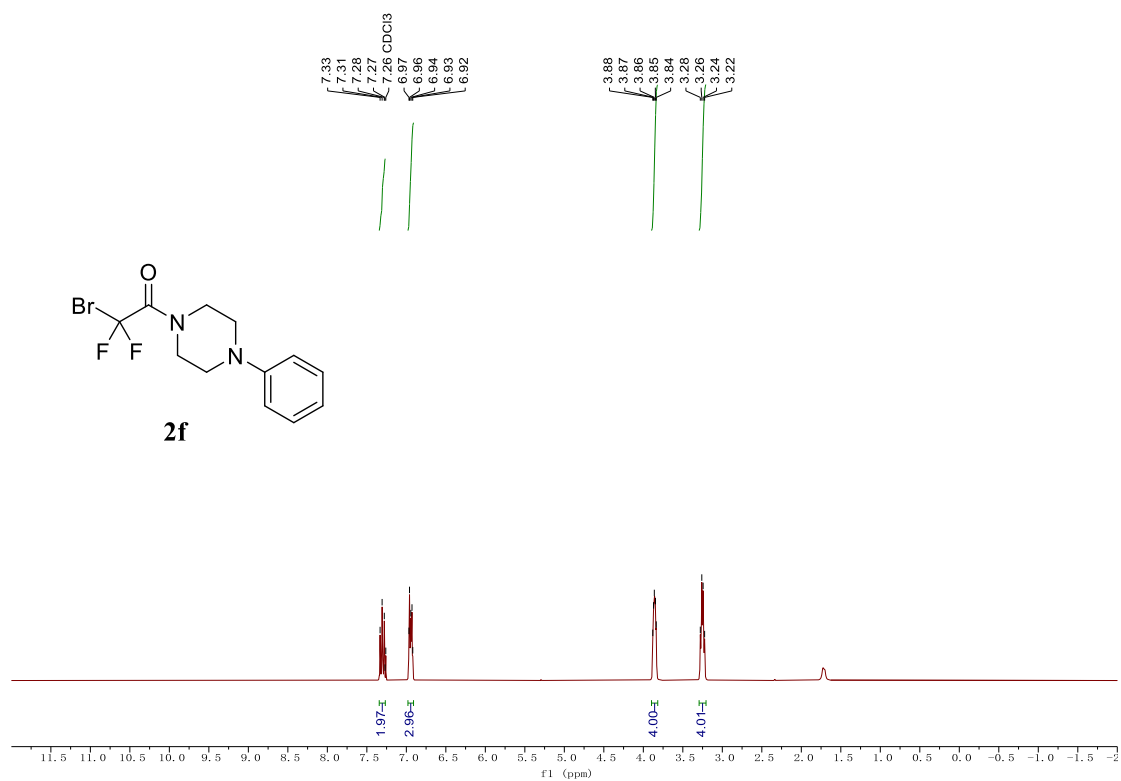

$^{19}\text{F}$  NMR Spectrum of Compound **2f** (282 MHz,  $\text{CDCl}_3$ )

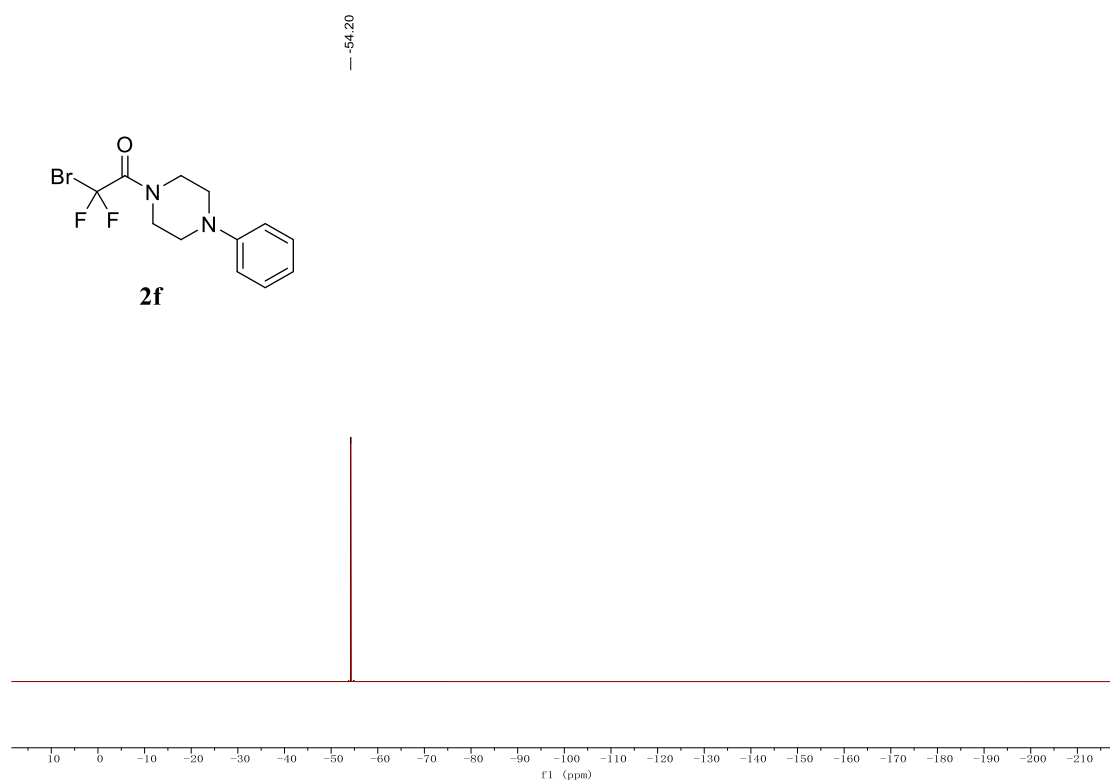

$^1\text{H}$  NMR Spectrum of Compound **2g** (300 MHz,  $\text{CDCl}_3$ )

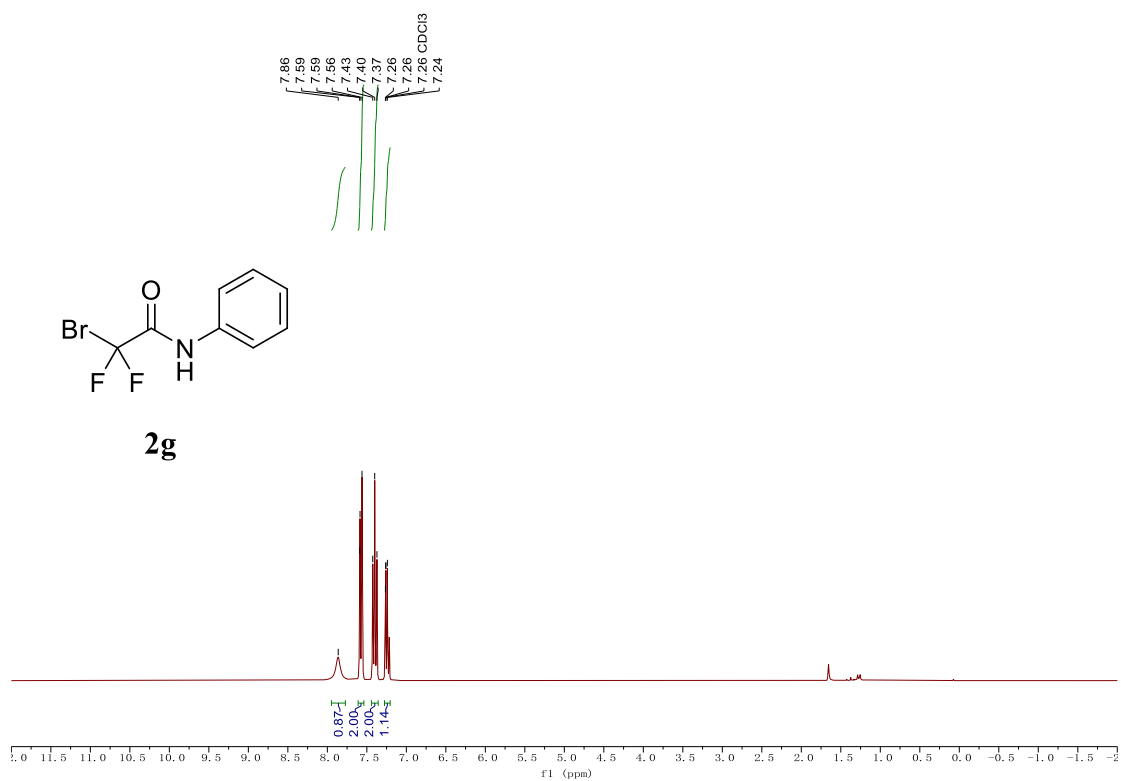

$^{19}\text{F}$  NMR Spectrum of Compound **2g** (282 MHz,  $\text{CDCl}_3$ )

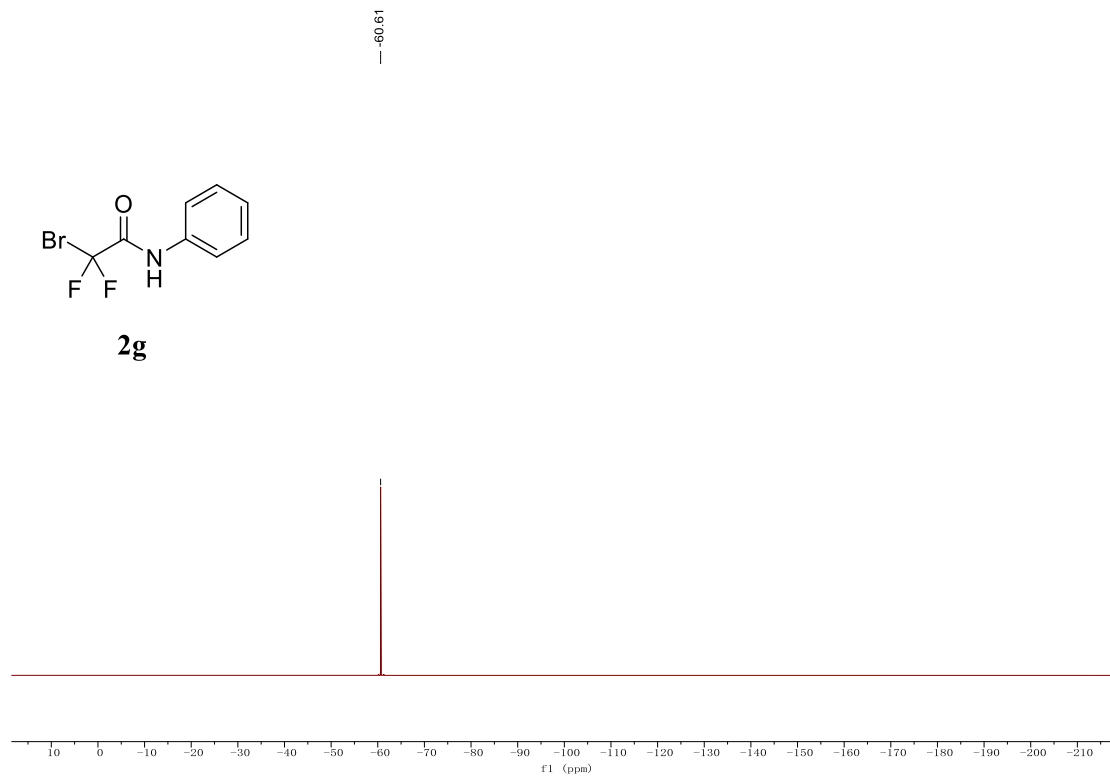

### $^1\text{H}$ NMR Spectrum of Compound **2h** (300 MHz, $\text{CDCl}_3$ )

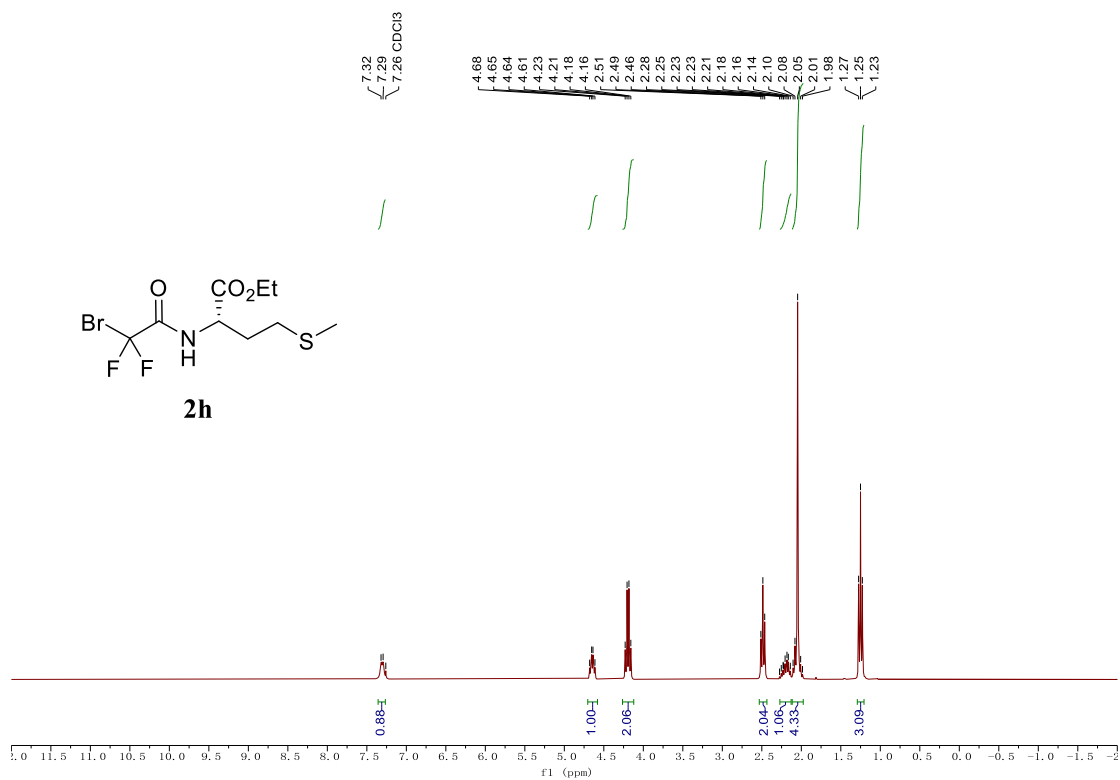

### $^{13}\text{C}$ NMR Spectrum of Compound **2h** (75 MHz, $\text{CDCl}_3$ )

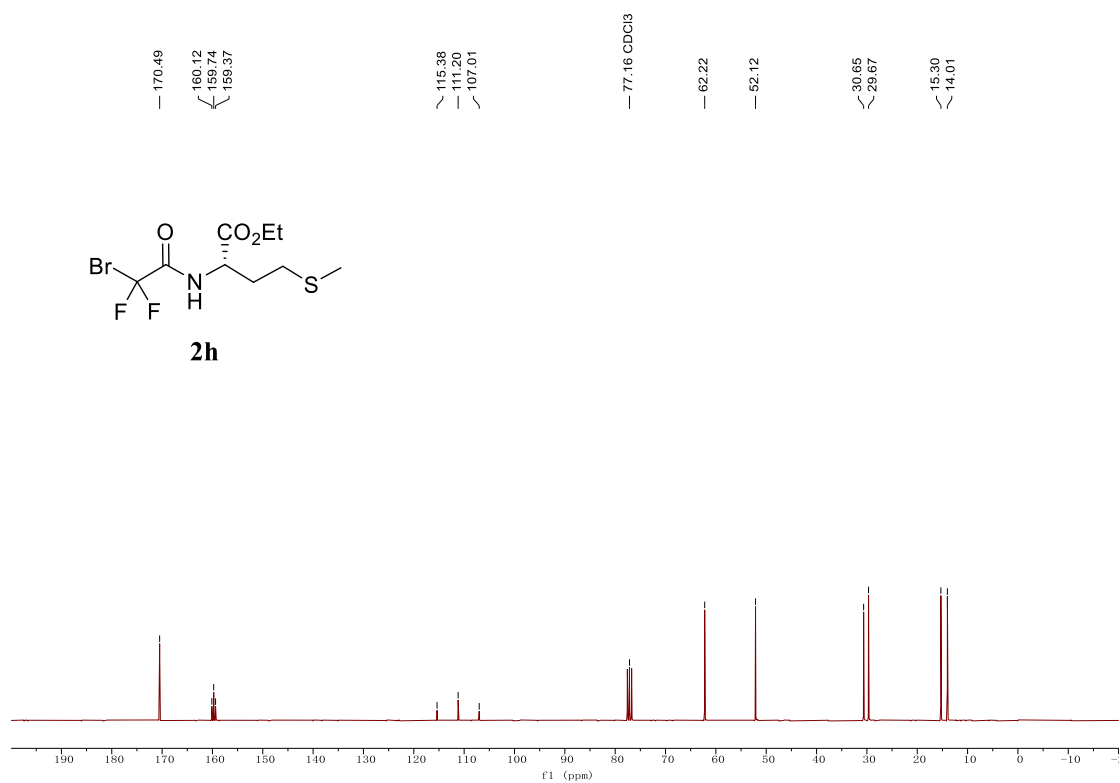



$^{19}\text{F}$  NMR Spectrum of Compound **2h** (282 MHz,  $\text{CDCl}_3$ )

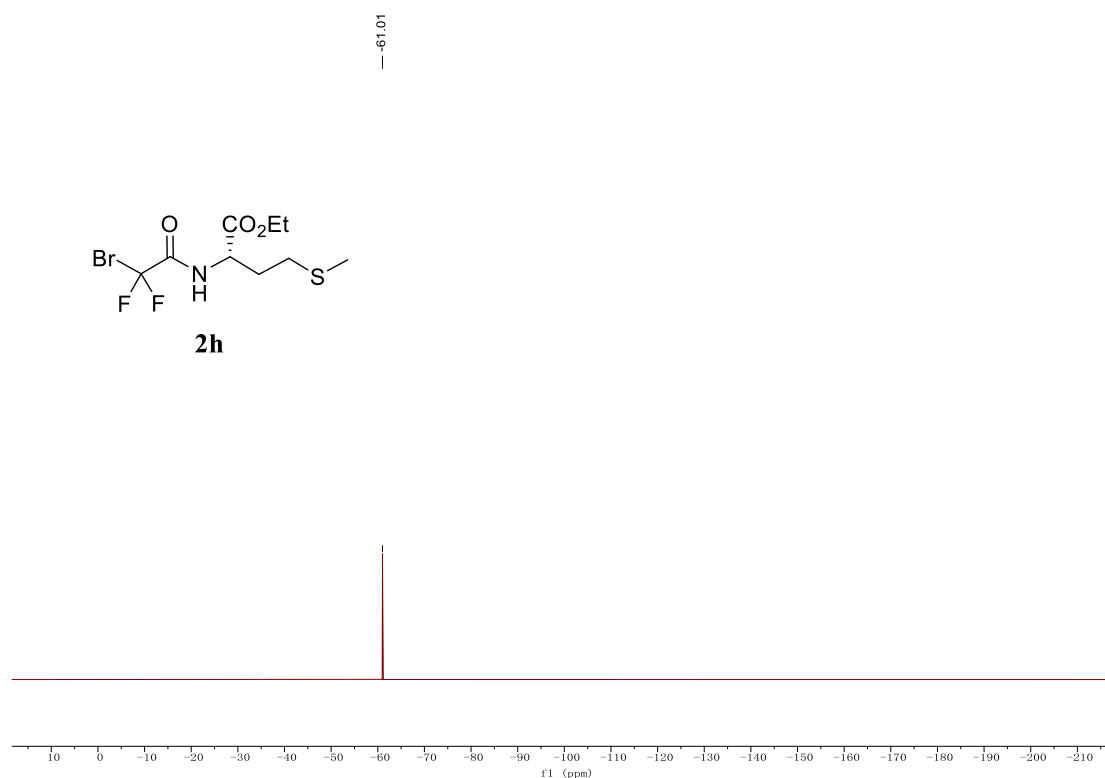

$^1\text{H}$  NMR Spectrum of Compound **2i** (300 MHz,  $\text{CDCl}_3$ )

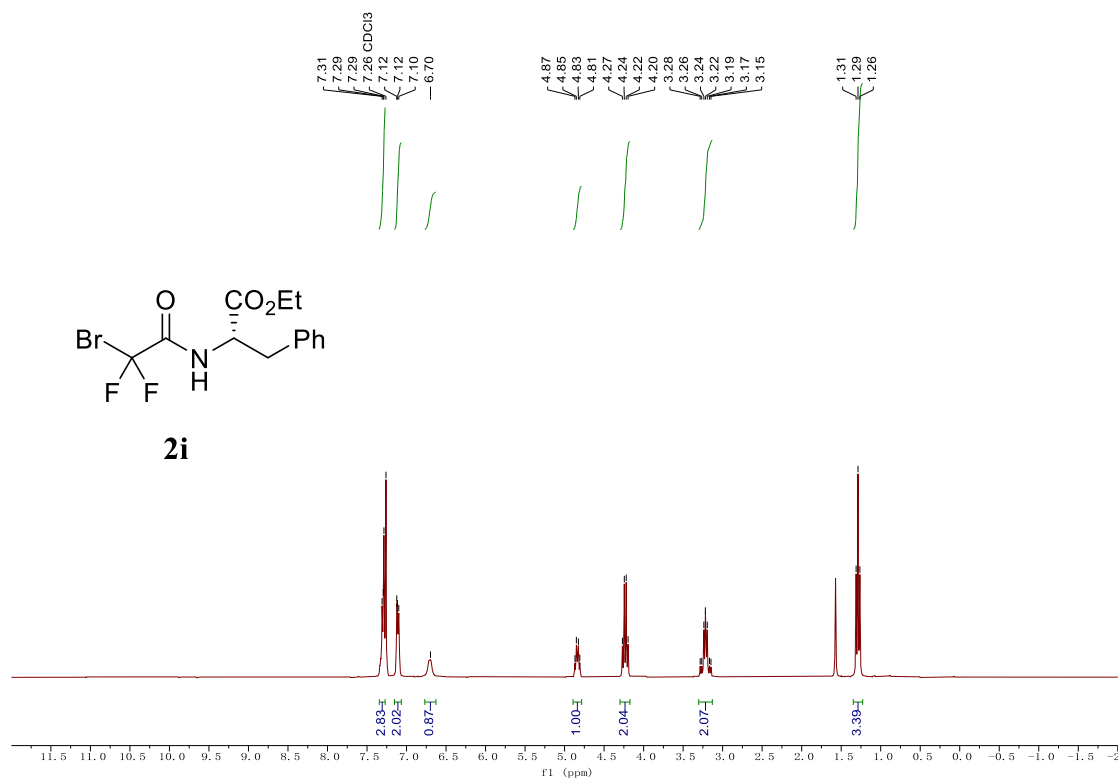

<sup>19</sup>F NMR Spectrum of Compound **2i** (282 MHz, CDCl<sub>3</sub>)

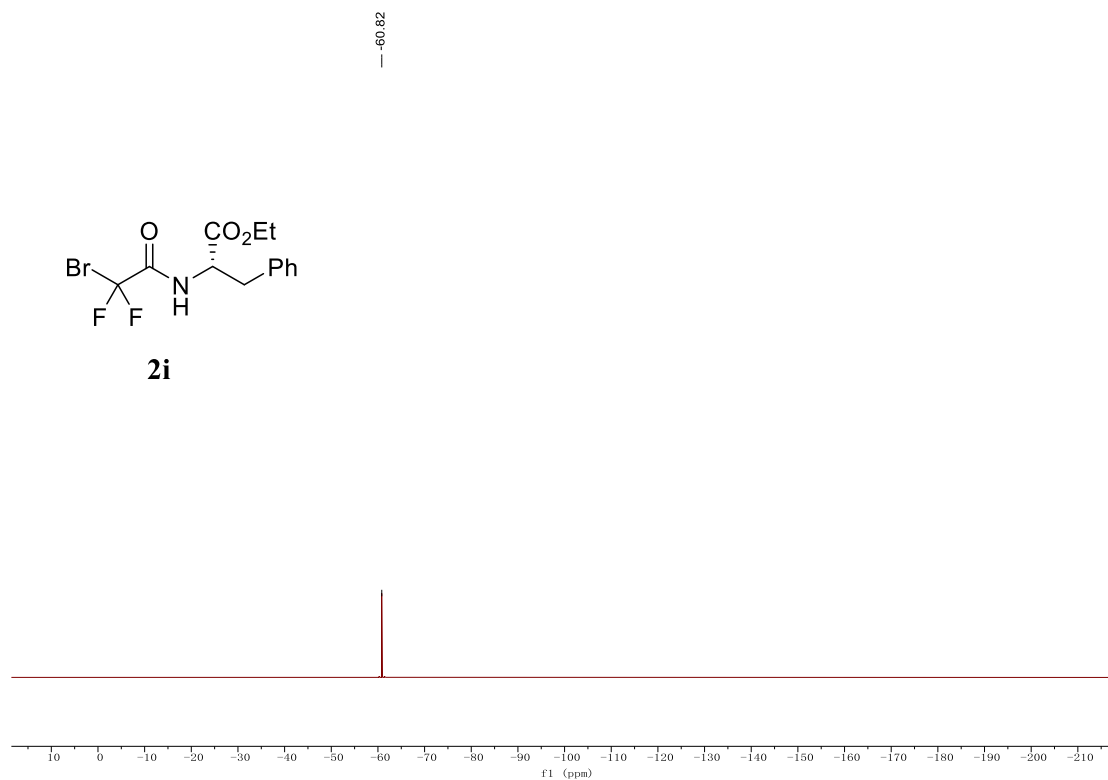

<sup>1</sup>H NMR Spectrum of Compound **2j** (300 MHz, CDCl<sub>3</sub>)

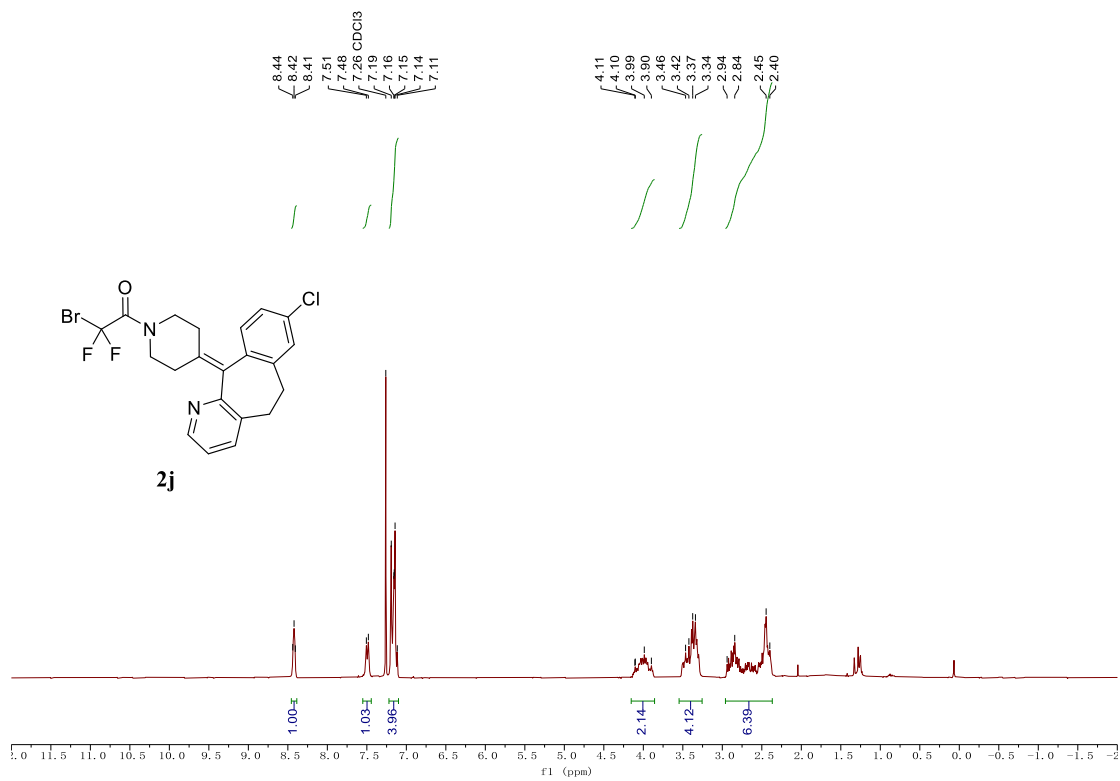

<sup>13</sup>C NMR Spectrum of Compound **2j** (101 MHz, CDCl<sub>3</sub>)

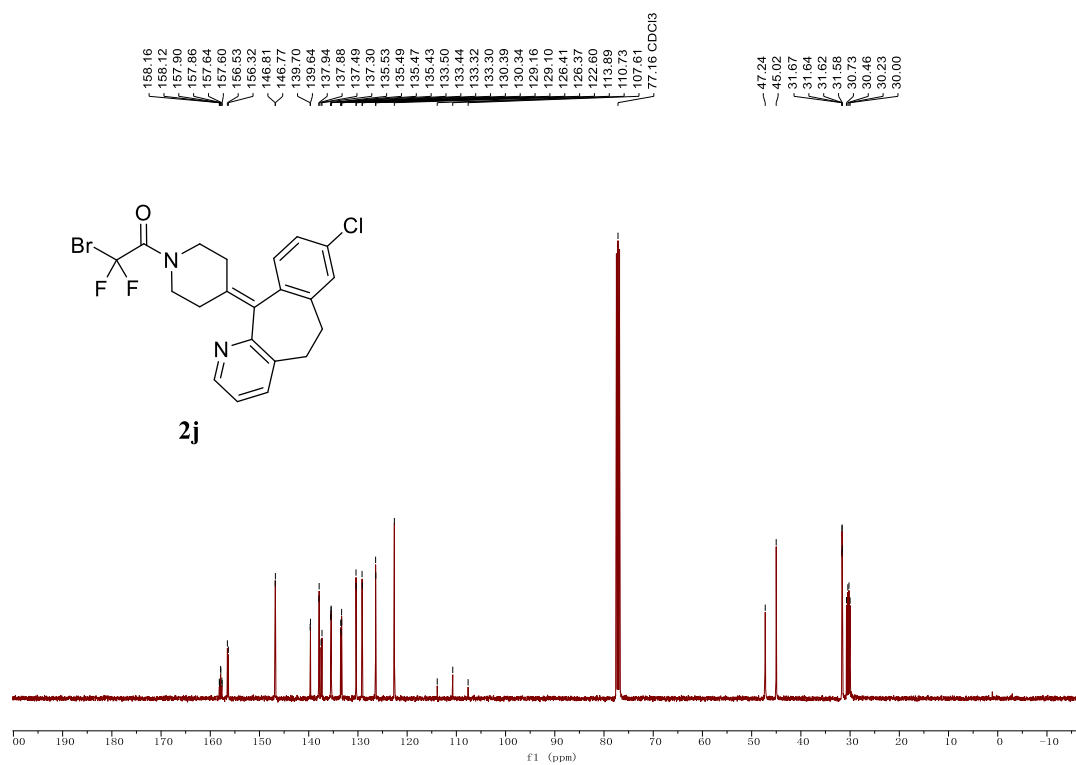

<sup>19</sup>F NMR Spectrum of Compound **2j** (282 MHz, CDCl<sub>3</sub>)

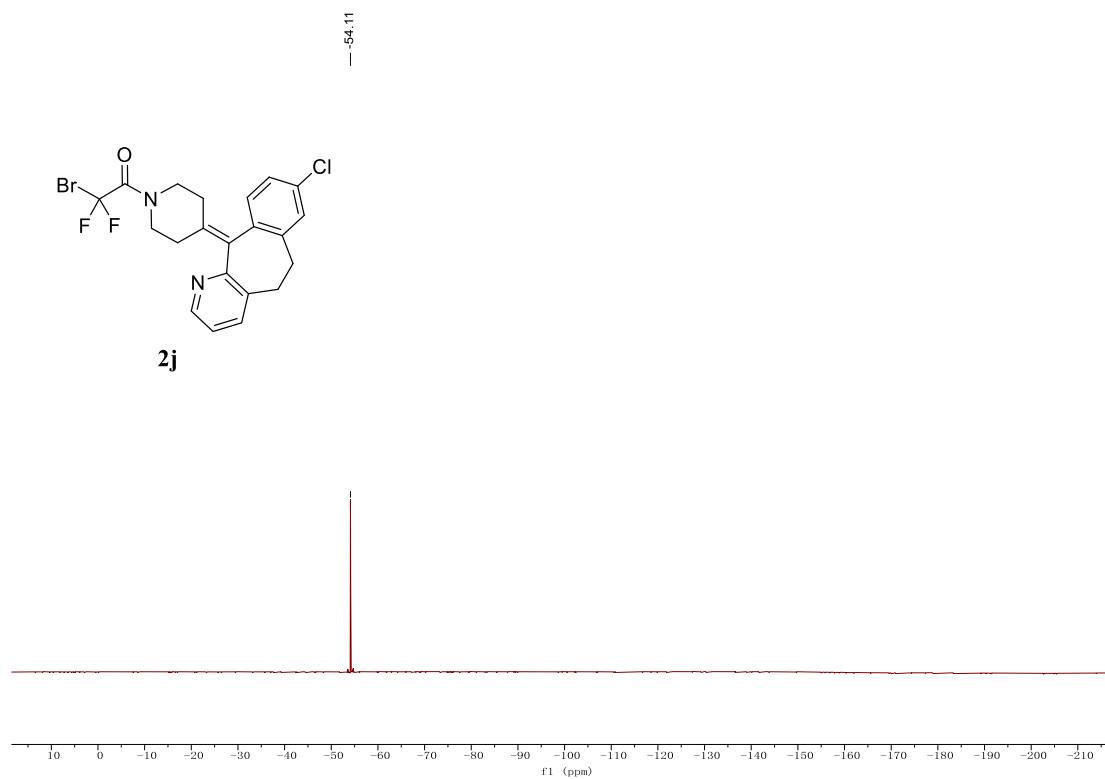

<sup>1</sup>H NMR Spectrum of Compound **2k** (300 MHz, CDCl<sub>3</sub>)

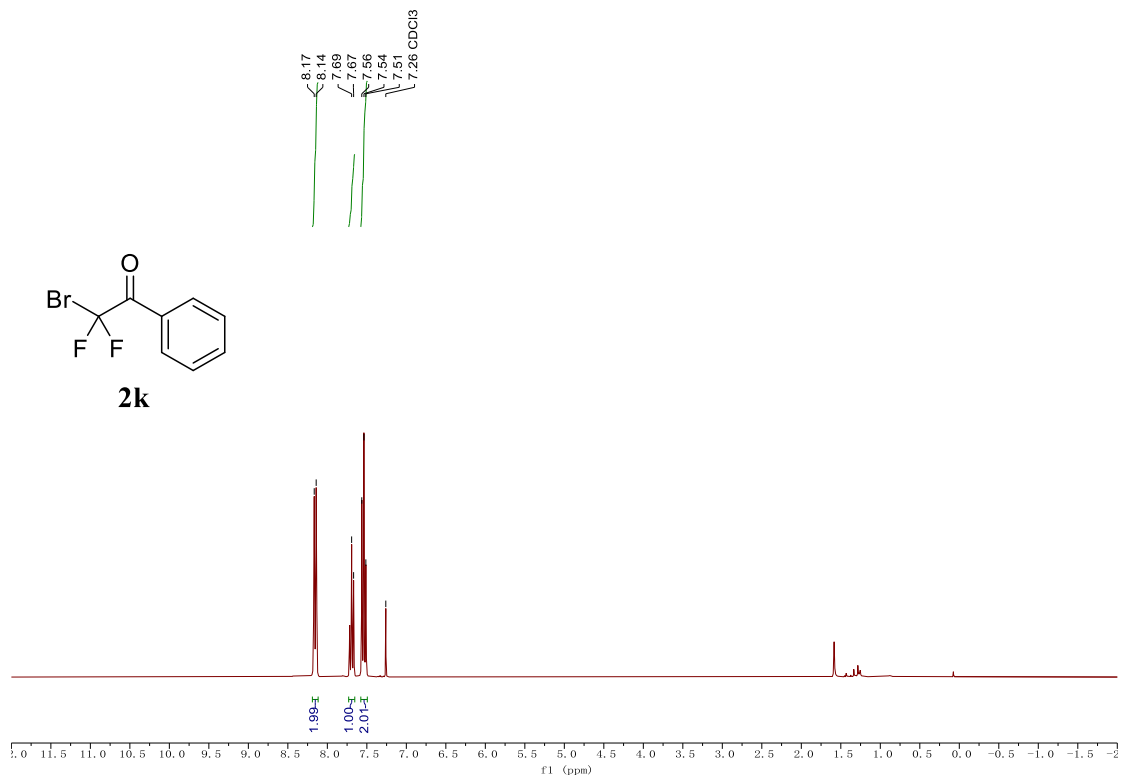

<sup>19</sup>F NMR Spectrum of Compound **2k** (282 MHz, CDCl<sub>3</sub>)

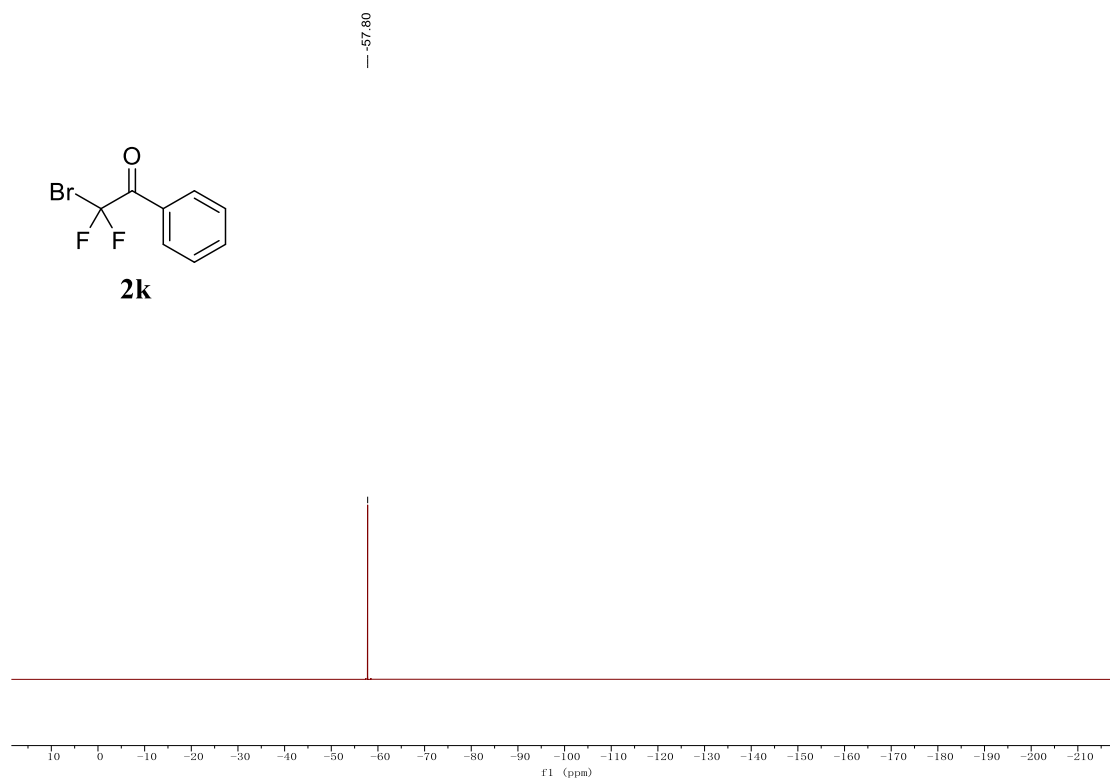

<sup>1</sup>H NMR Spectrum of Compound **21** (300 MHz, CDCl<sub>3</sub>)

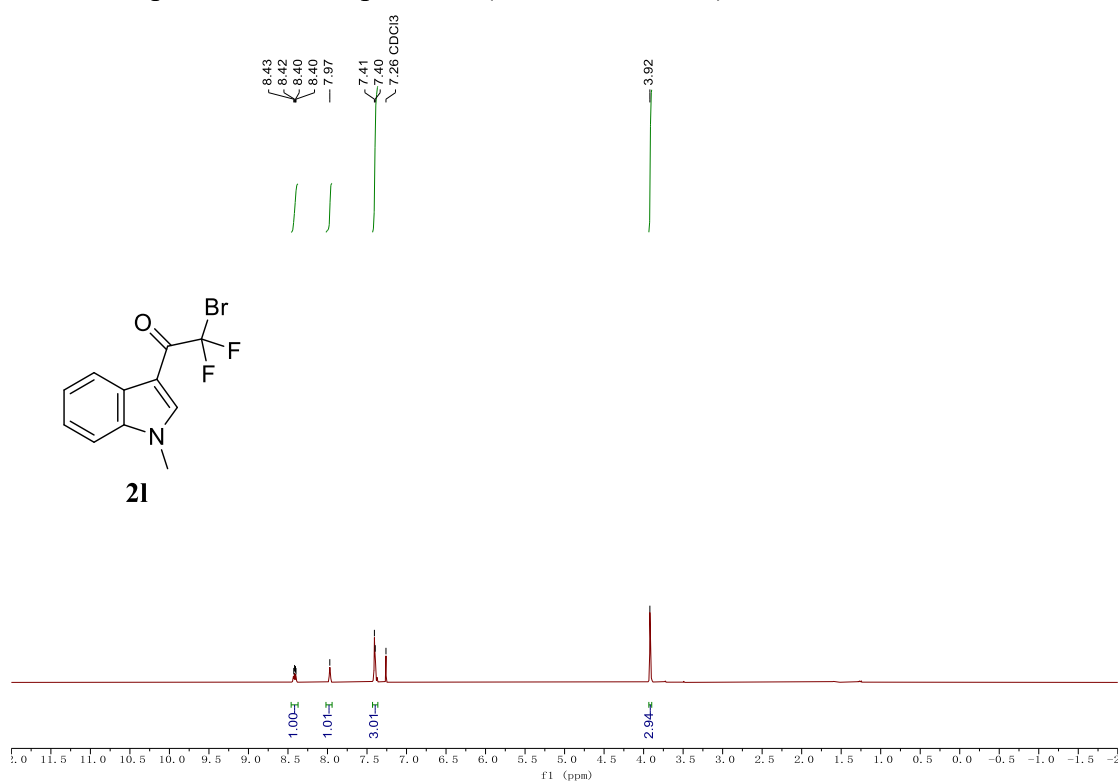

<sup>19</sup>F NMR Spectrum of Compound **21** (282 MHz, CDCl<sub>3</sub>)

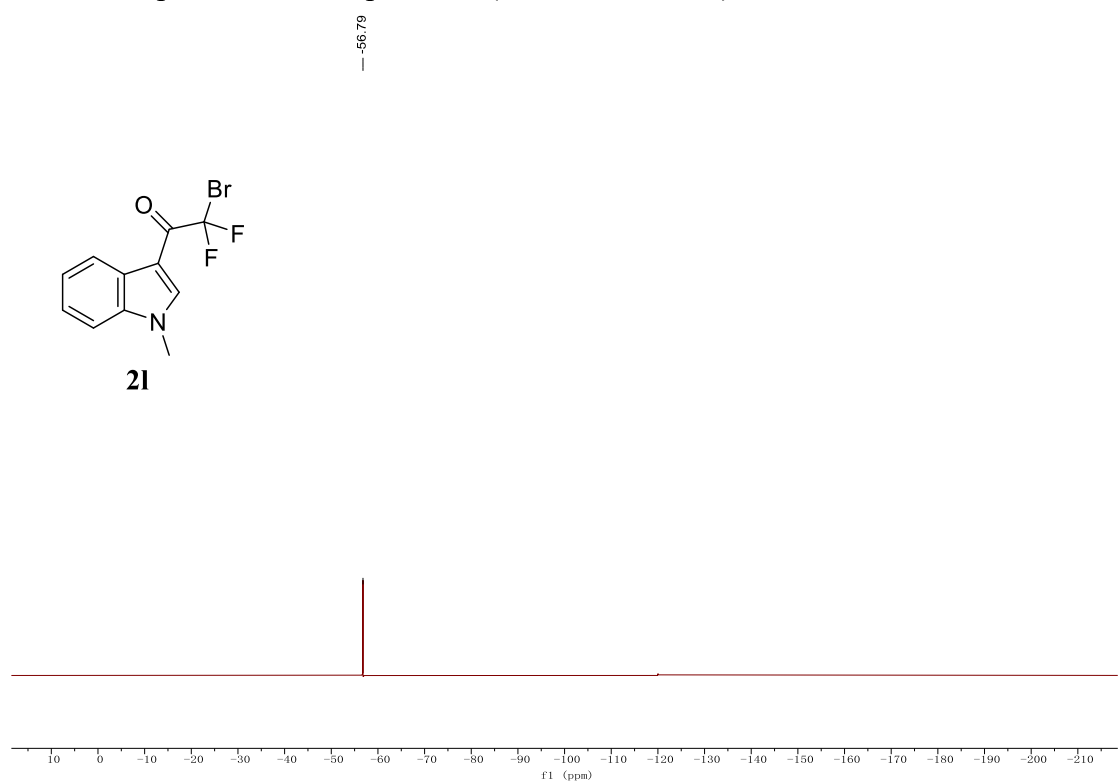

$^1\text{H}$  NMR Spectrum of Compound **2m** (300 MHz,  $\text{DMSO-}d_6$ )

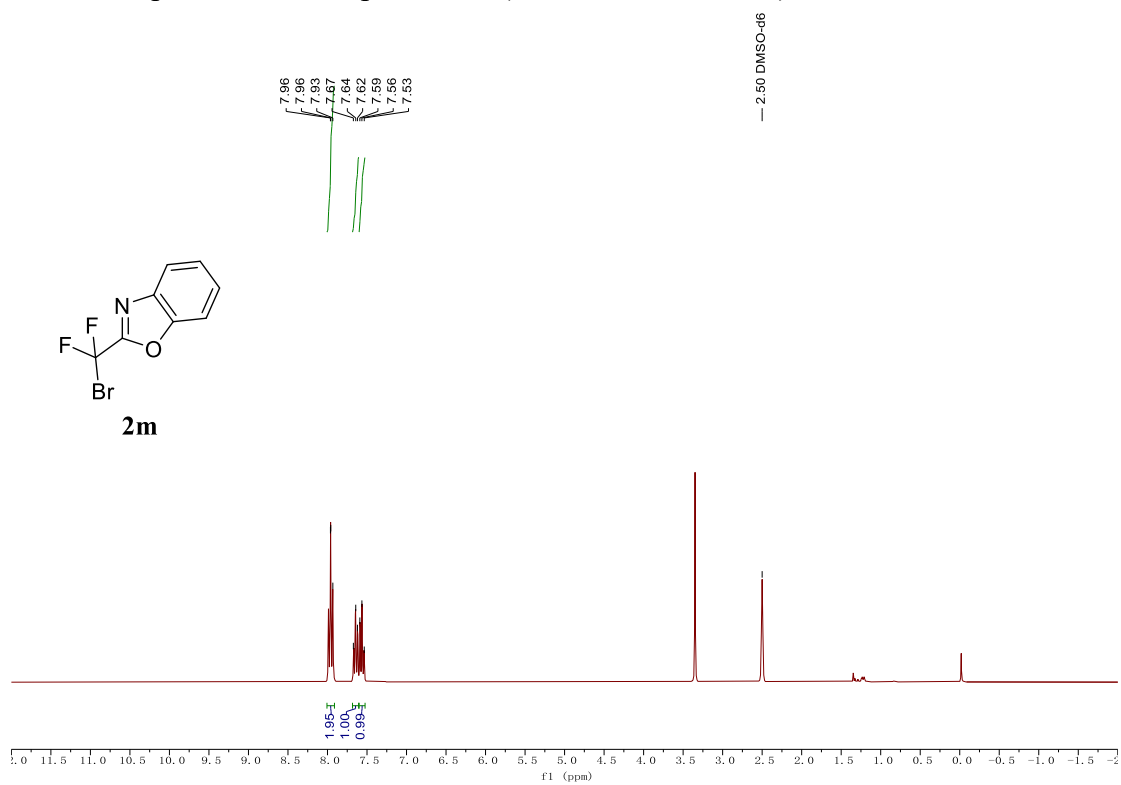

$^{19}\text{F}$  NMR Spectrum of Compound **2m** (282 MHz,  $\text{CDCl}_3$ )

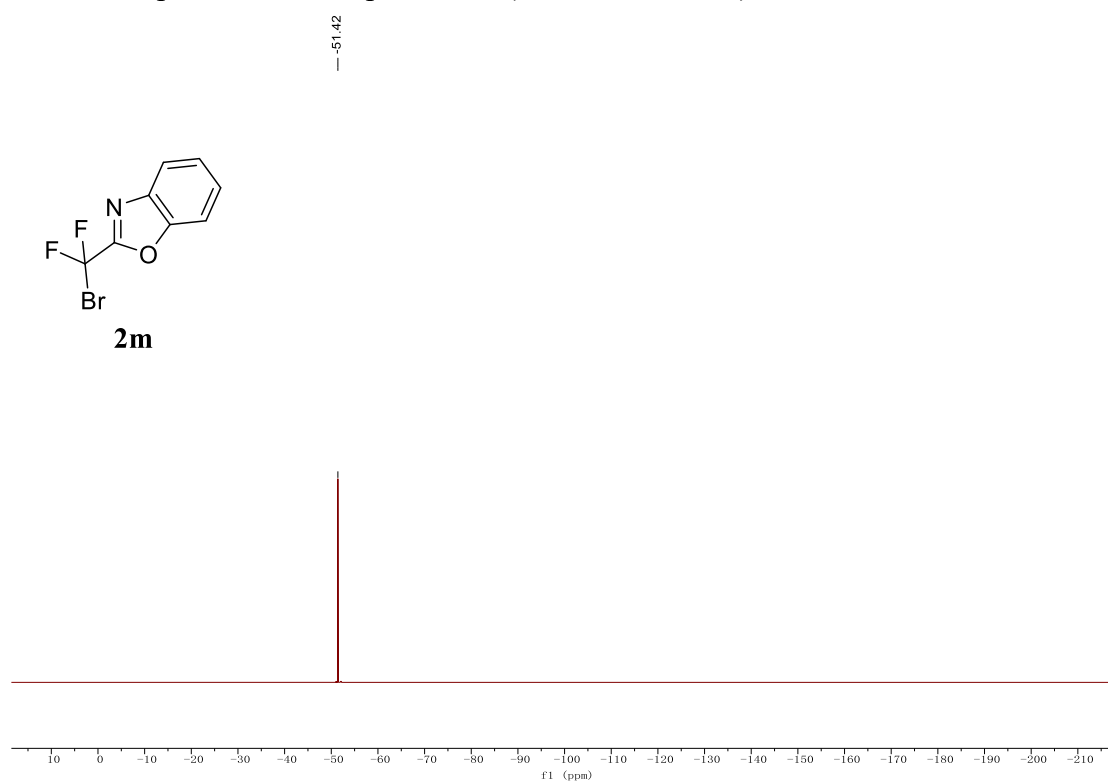

<sup>1</sup>H NMR Spectrum of Compound **2n** (300 MHz, DMSO-*d*<sub>6</sub>)

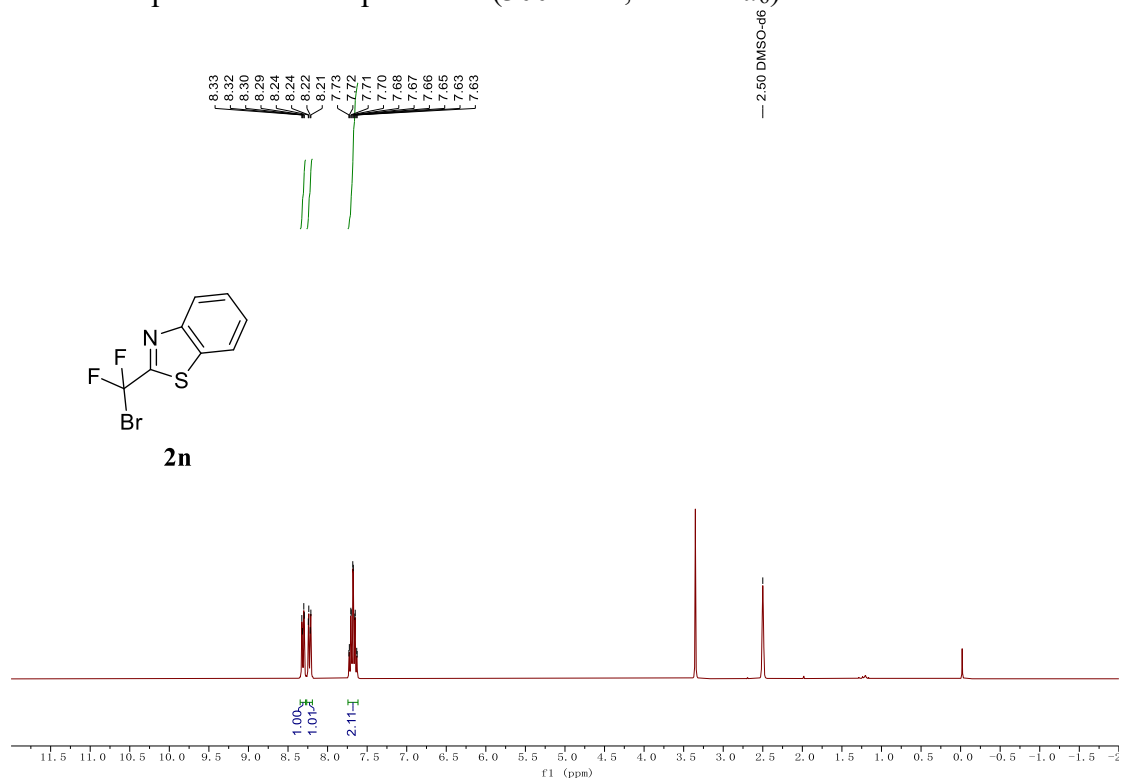

<sup>19</sup>F NMR Spectrum of Compound **2n** (282 MHz, CDCl<sub>3</sub>)

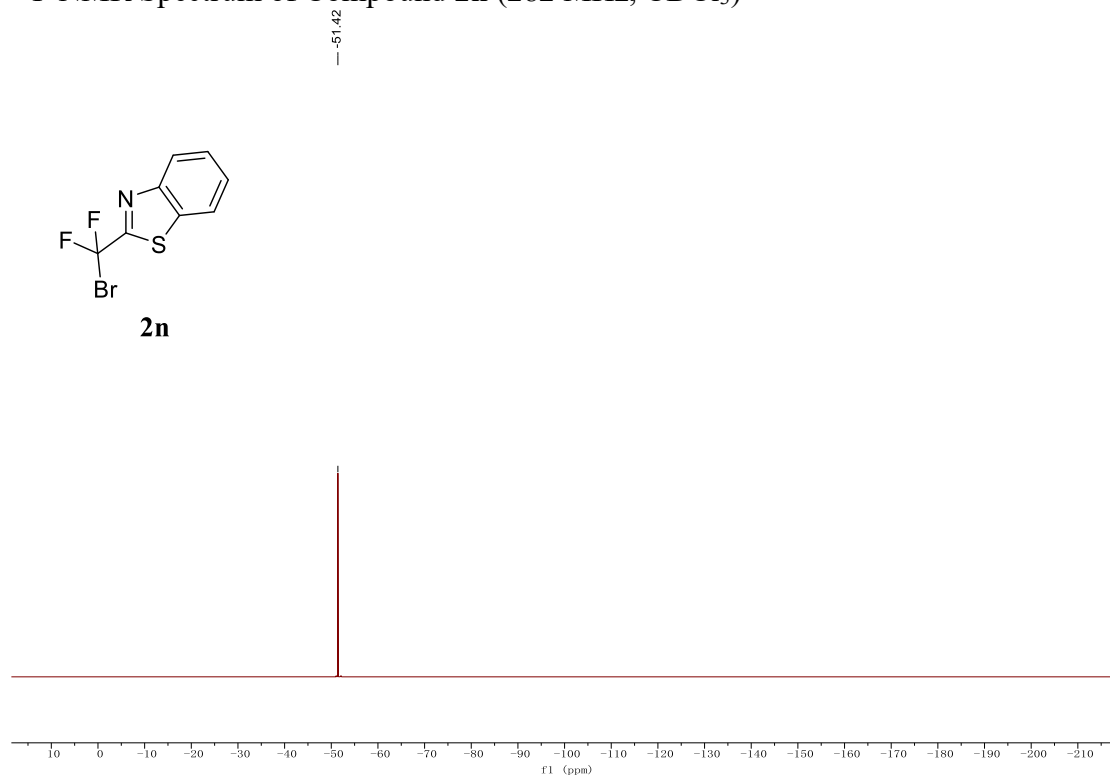

<sup>1</sup>H NMR Spectrum of Compound **3a** (300 MHz, CDCl<sub>3</sub>)

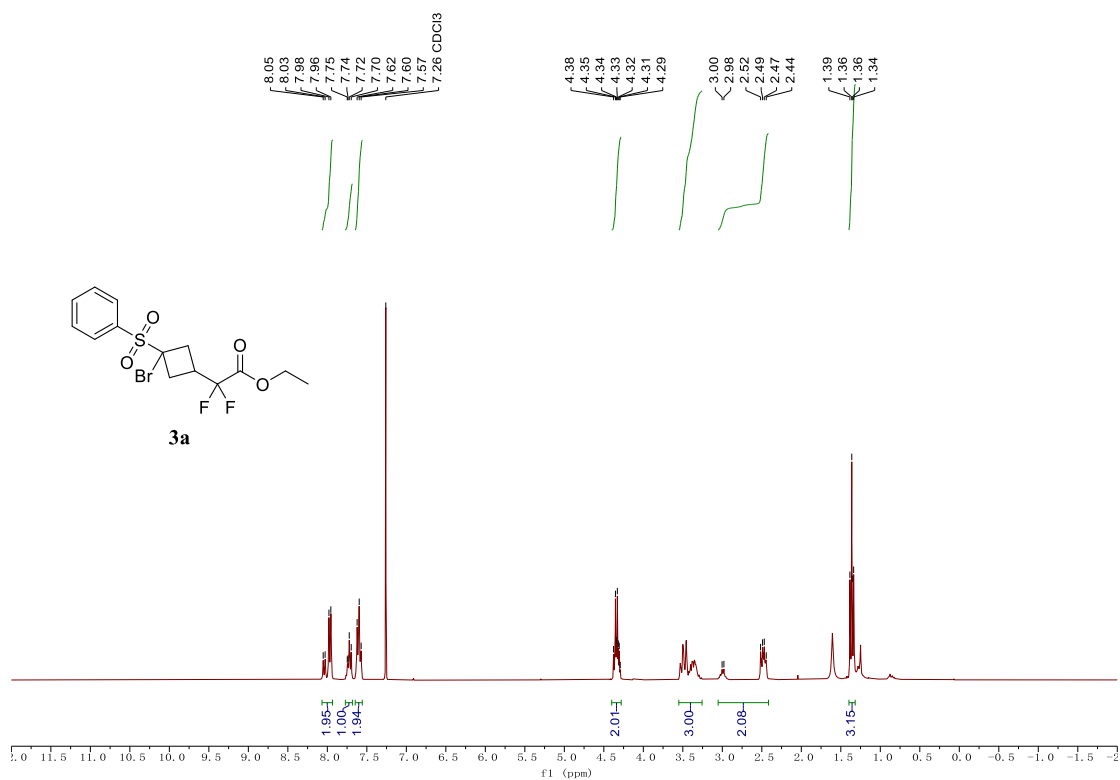

<sup>13</sup>C NMR Spectrum of Compound **3a** (75 MHz, CDCl<sub>3</sub>)

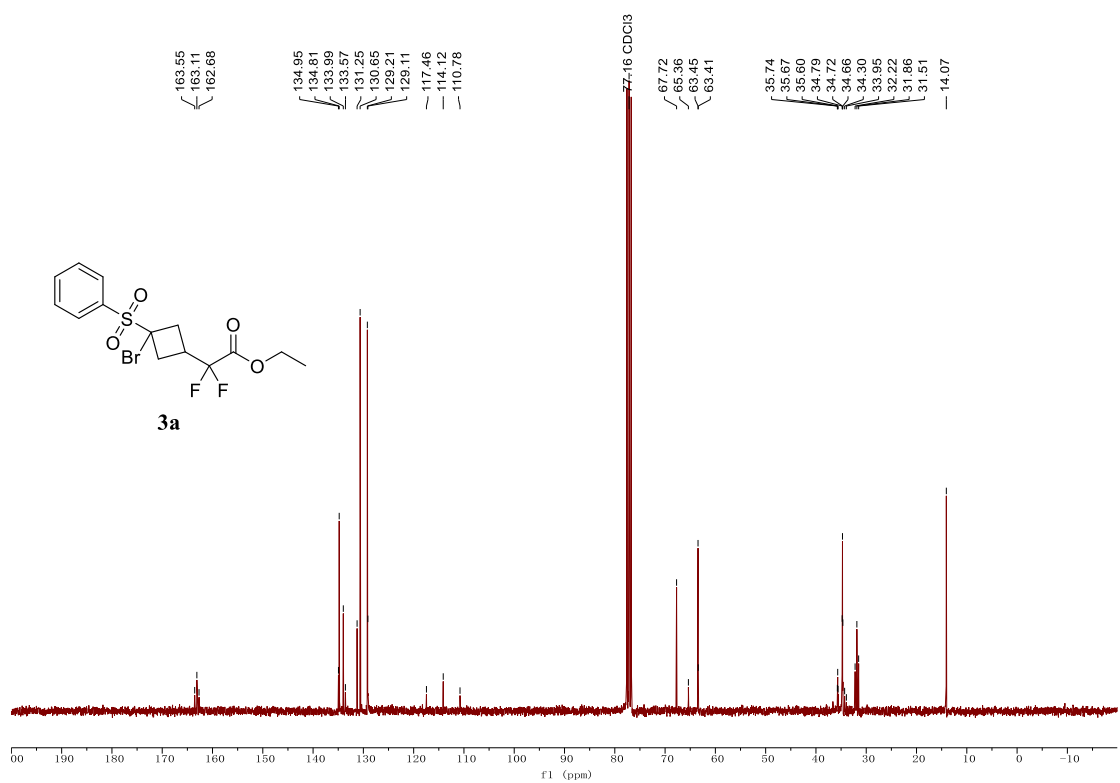



### $^{19}\text{F}$ NMR Spectrum of Compound **3a** (282 MHz, $\text{CDCl}_3$ )

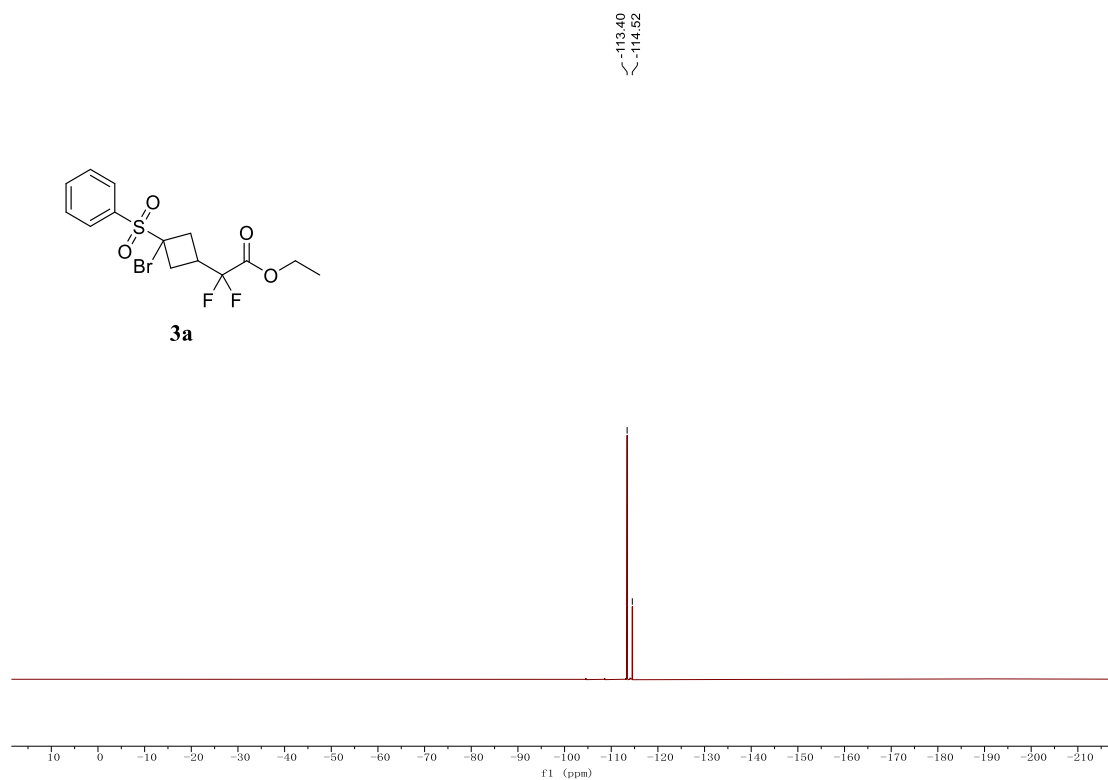

### $^1\text{H}$ NMR Spectrum of Compound **3b** (300 MHz, $\text{CDCl}_3$ )

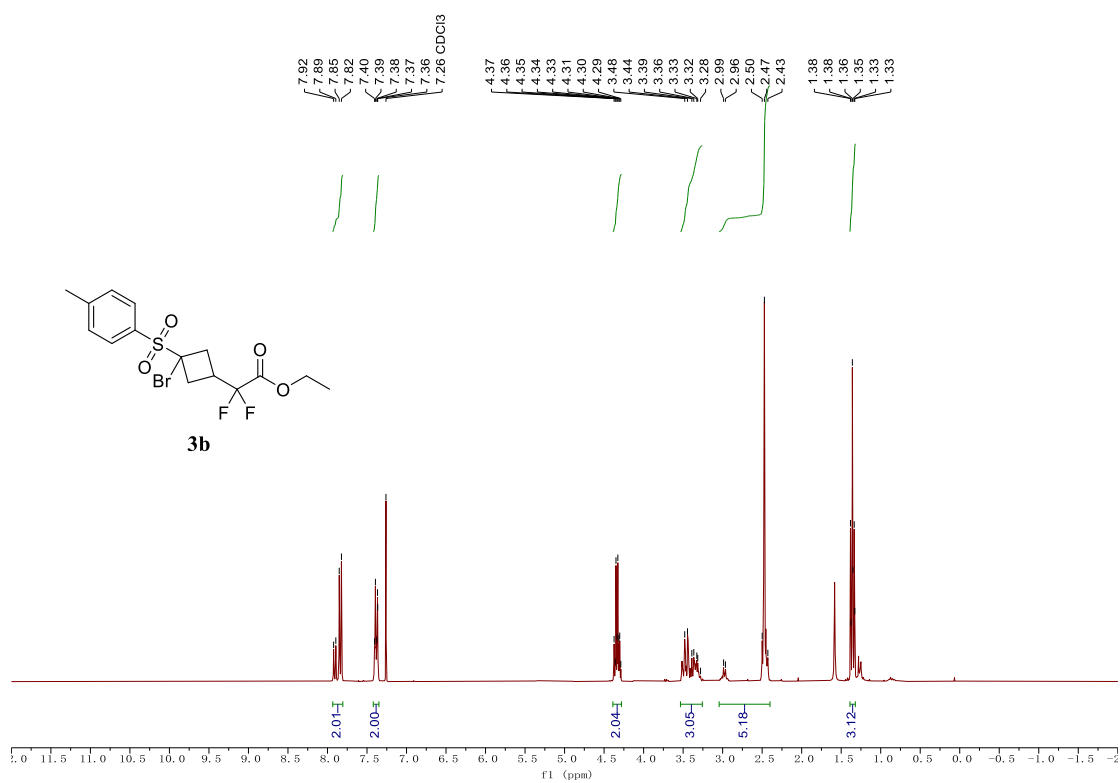

### <sup>13</sup>C NMR Spectrum of Compound **3b** (101 MHz, CDCl<sub>3</sub>)

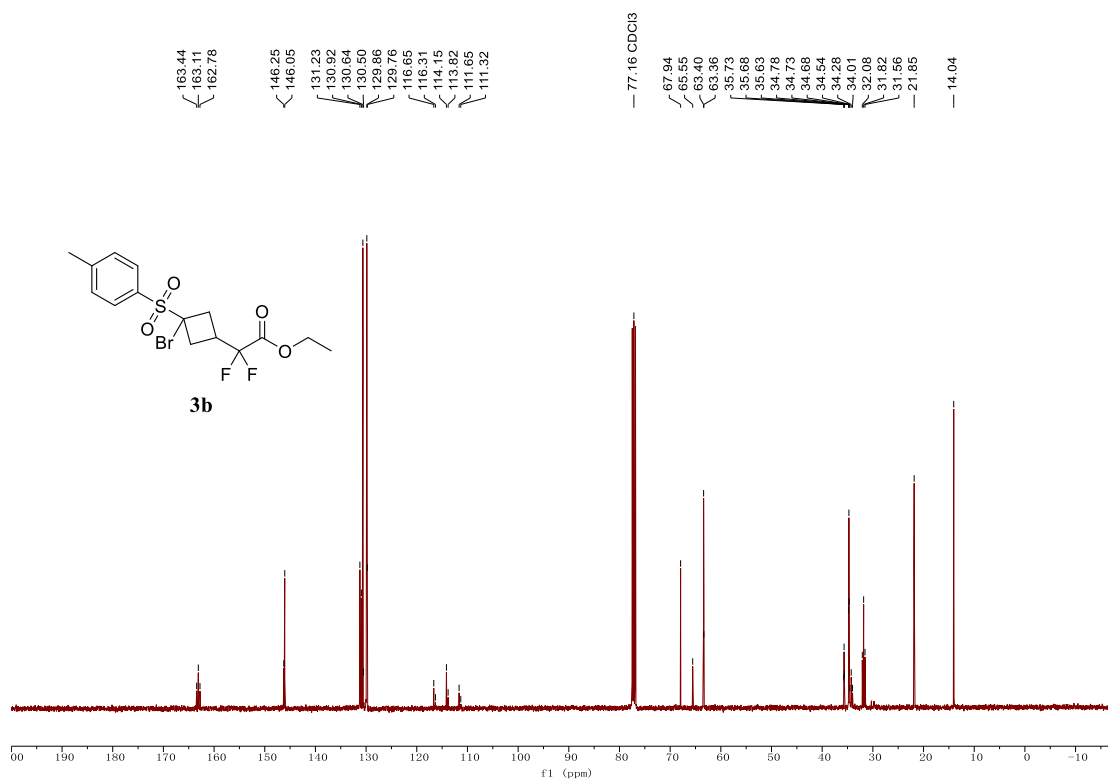

### <sup>19</sup>F NMR Spectrum of Compound **3b** (282 MHz, CDCl<sub>3</sub>)

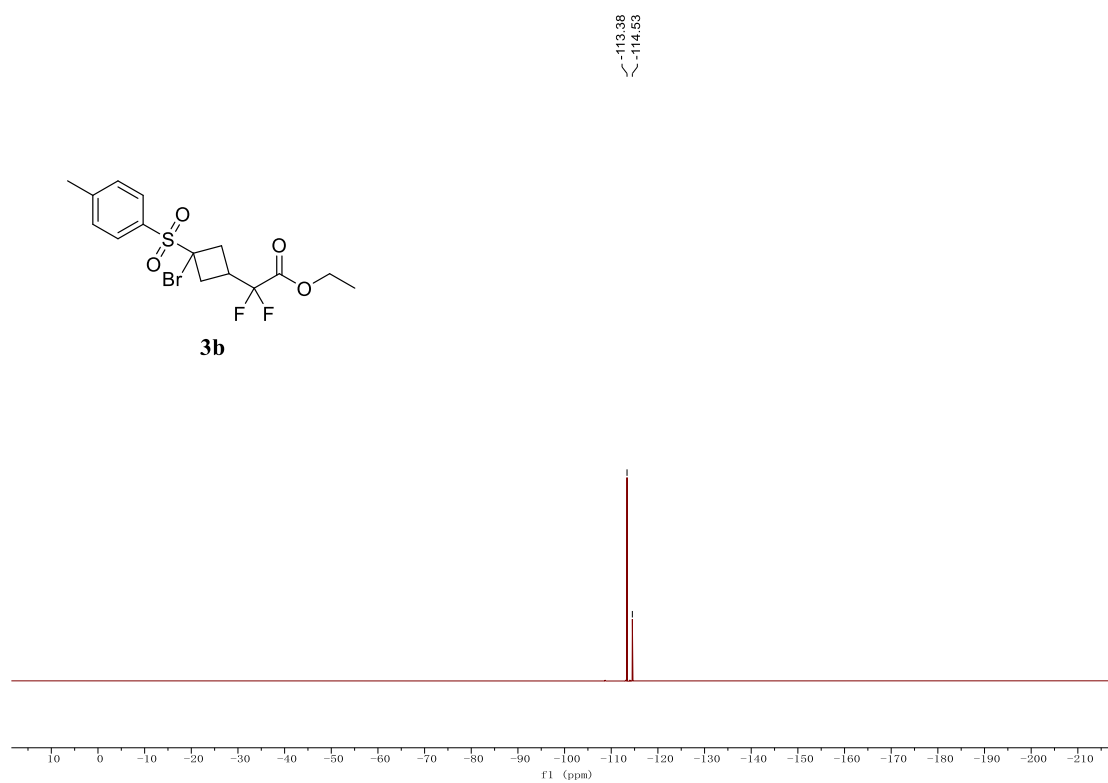

<sup>1</sup>H NMR Spectrum of Compound **3c** (300 MHz, CDCl<sub>3</sub>)

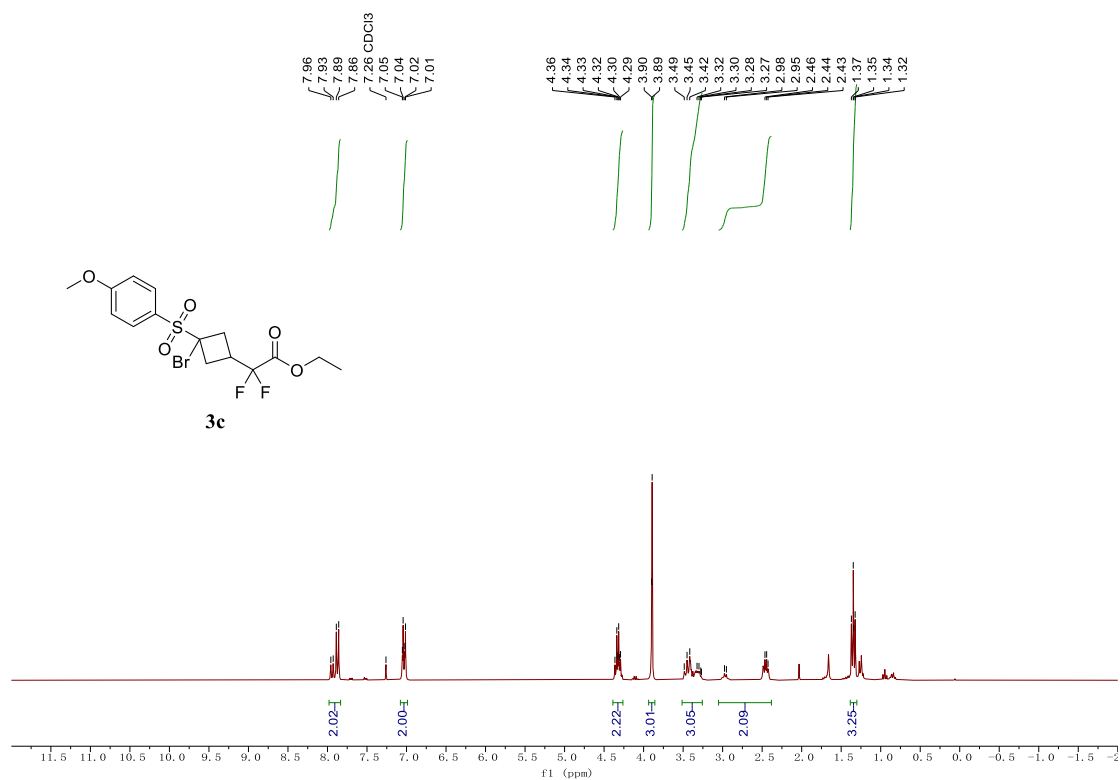

<sup>13</sup>C NMR Spectrum of Compound **3c** (101 MHz, CDCl<sub>3</sub>)

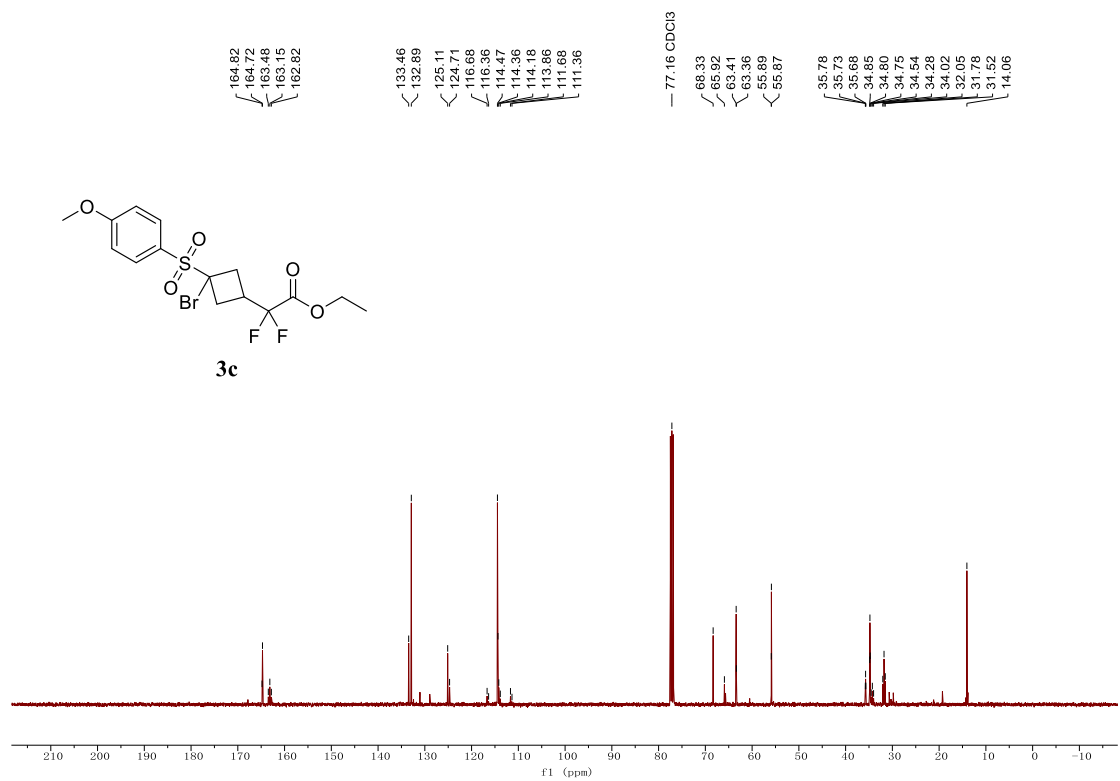

<sup>19</sup>F NMR Spectrum of Compound **3c** (282 MHz, CDCl<sub>3</sub>)

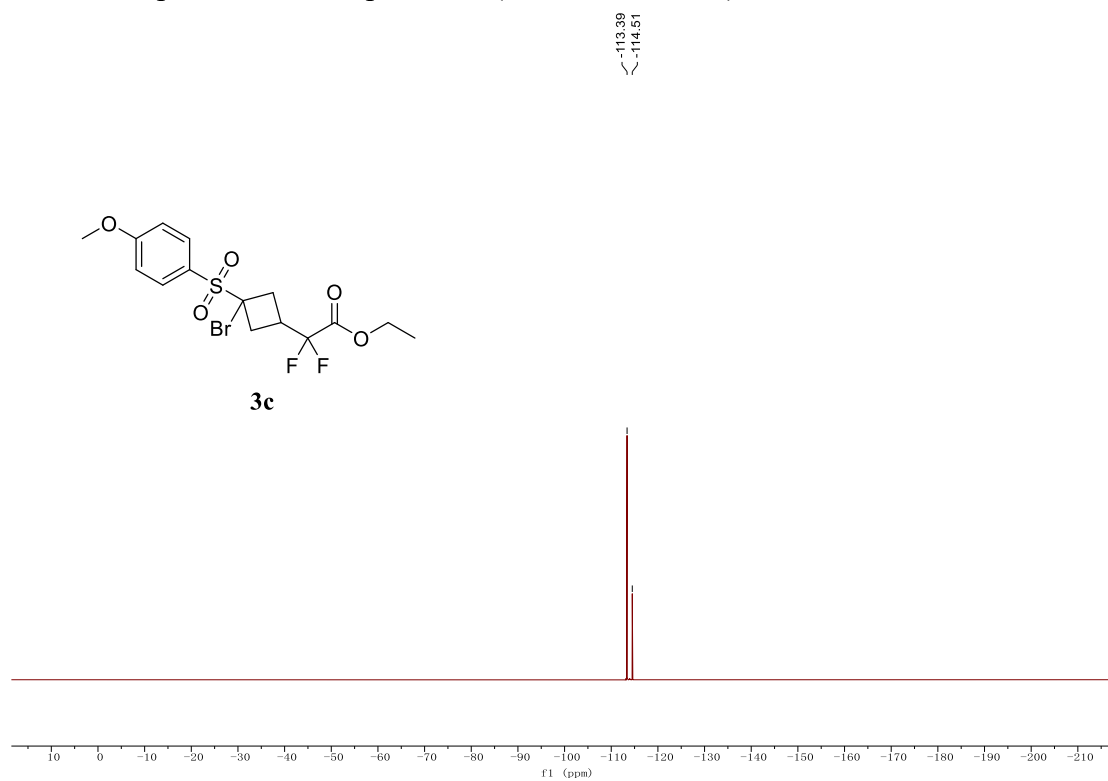

<sup>1</sup>H NMR Spectrum of Compound **3d** (400 MHz, CDCl<sub>3</sub>)

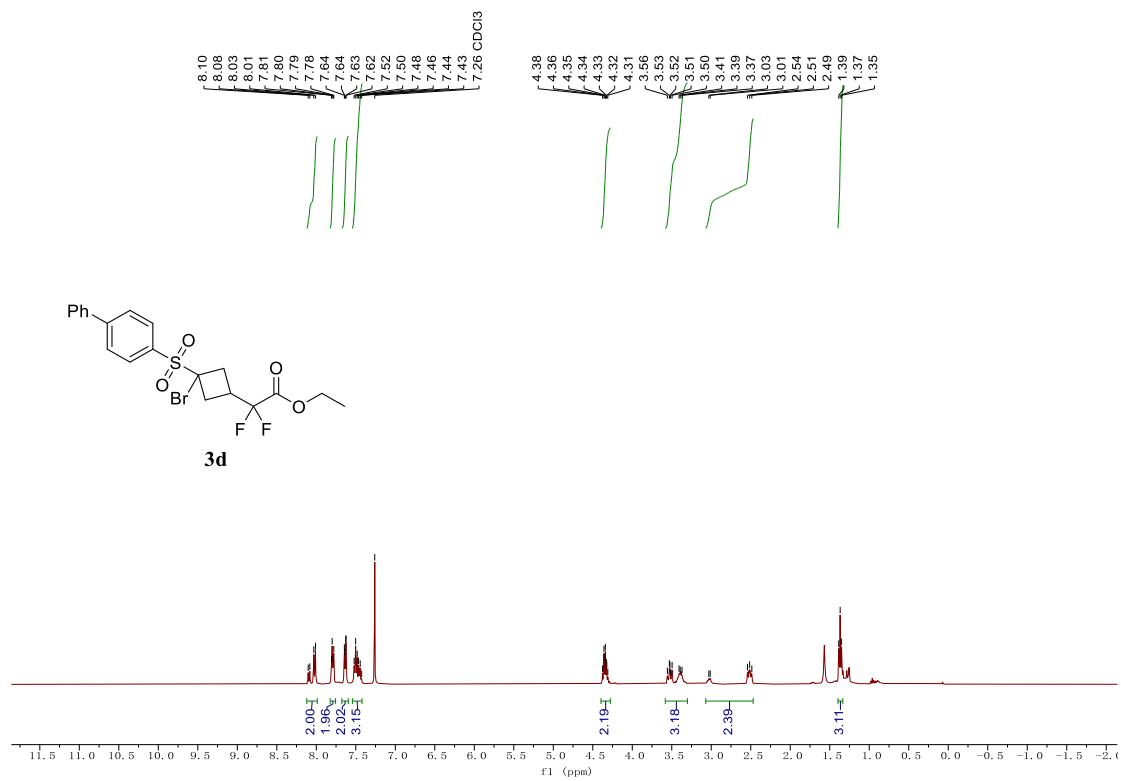

### <sup>13</sup>C NMR Spectrum of Compound **3d** (75 MHz, CDCl<sub>3</sub>)

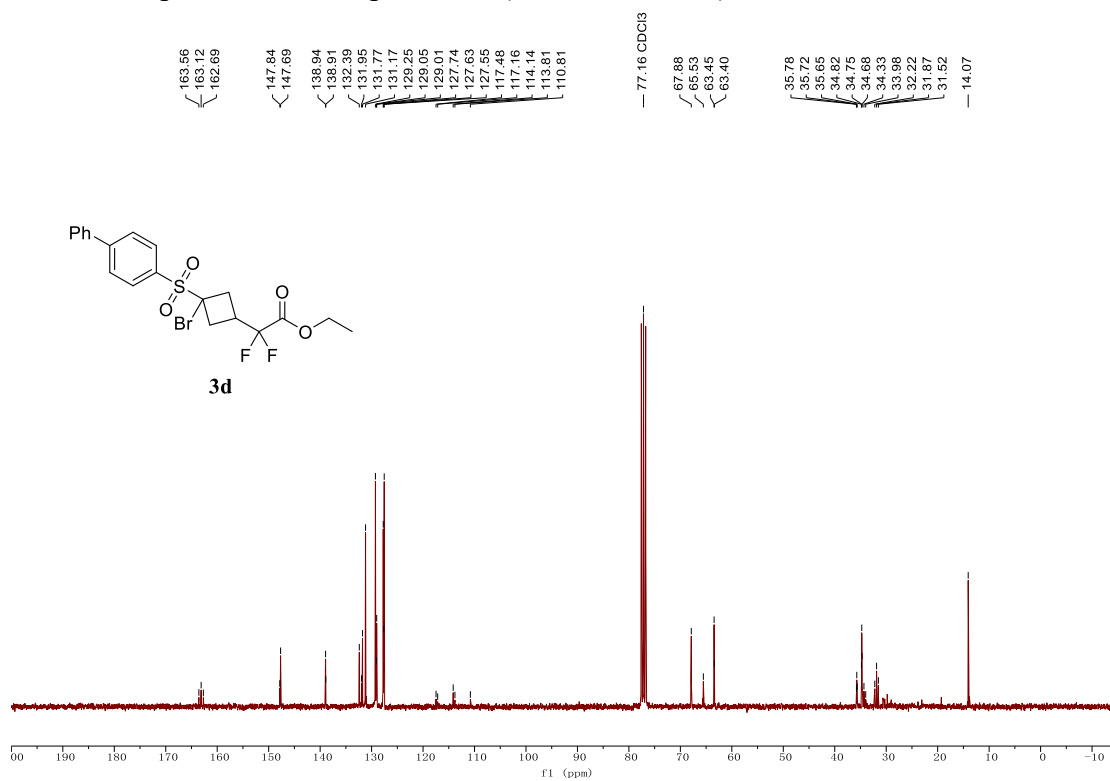

### <sup>19</sup>F NMR Spectrum of Compound **3d** (282 MHz, CDCl<sub>3</sub>)

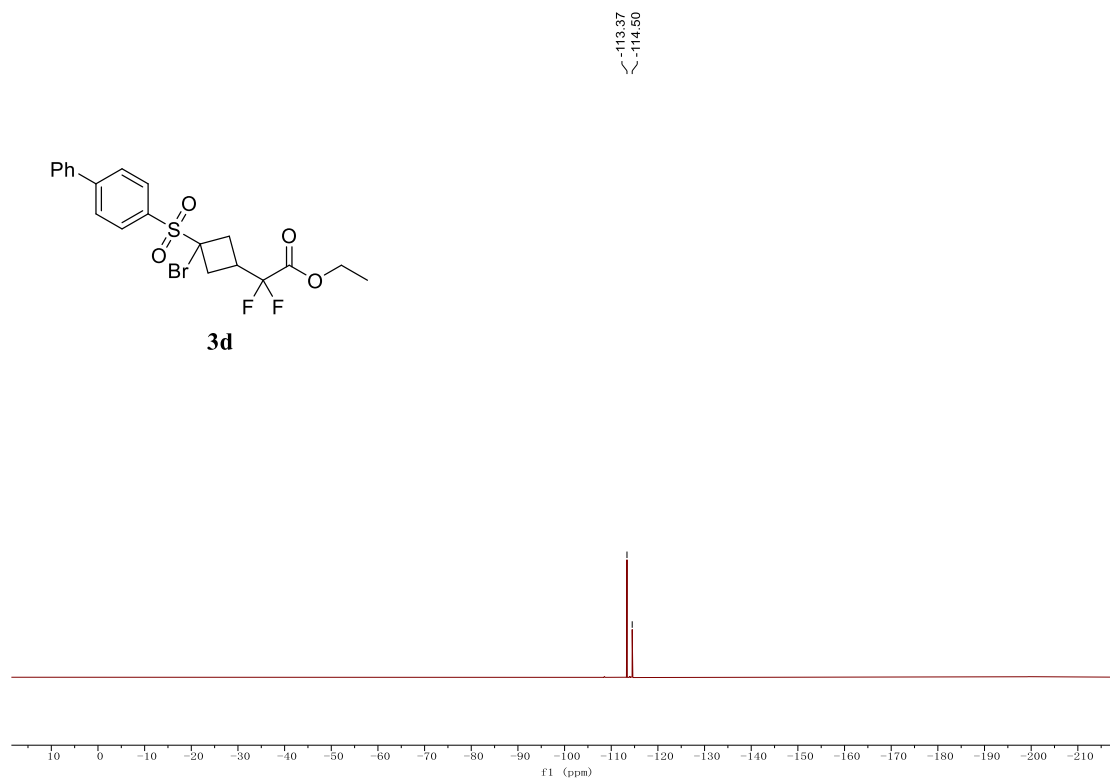

### $^1\text{H}$ NMR Spectrum of Compound **3e** (300 MHz, $\text{CDCl}_3$ )

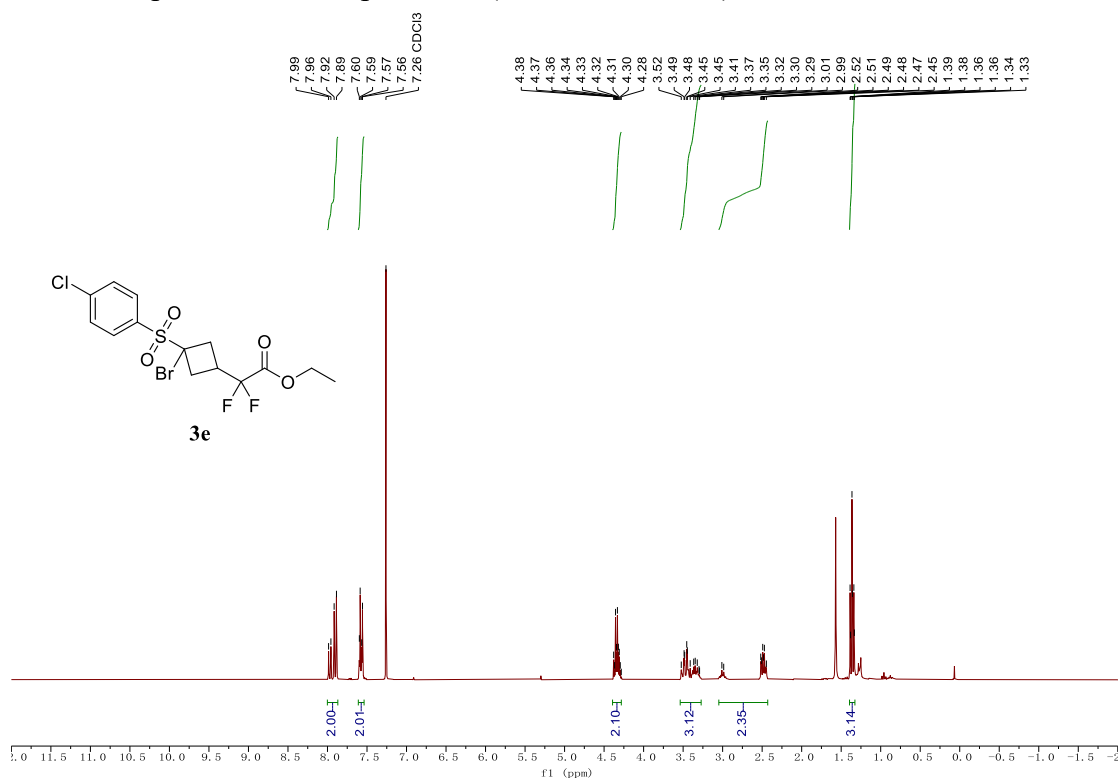

### $^{13}\text{C}$ NMR Spectrum of Compound **3e** (75 MHz, $\text{CDCl}_3$ )

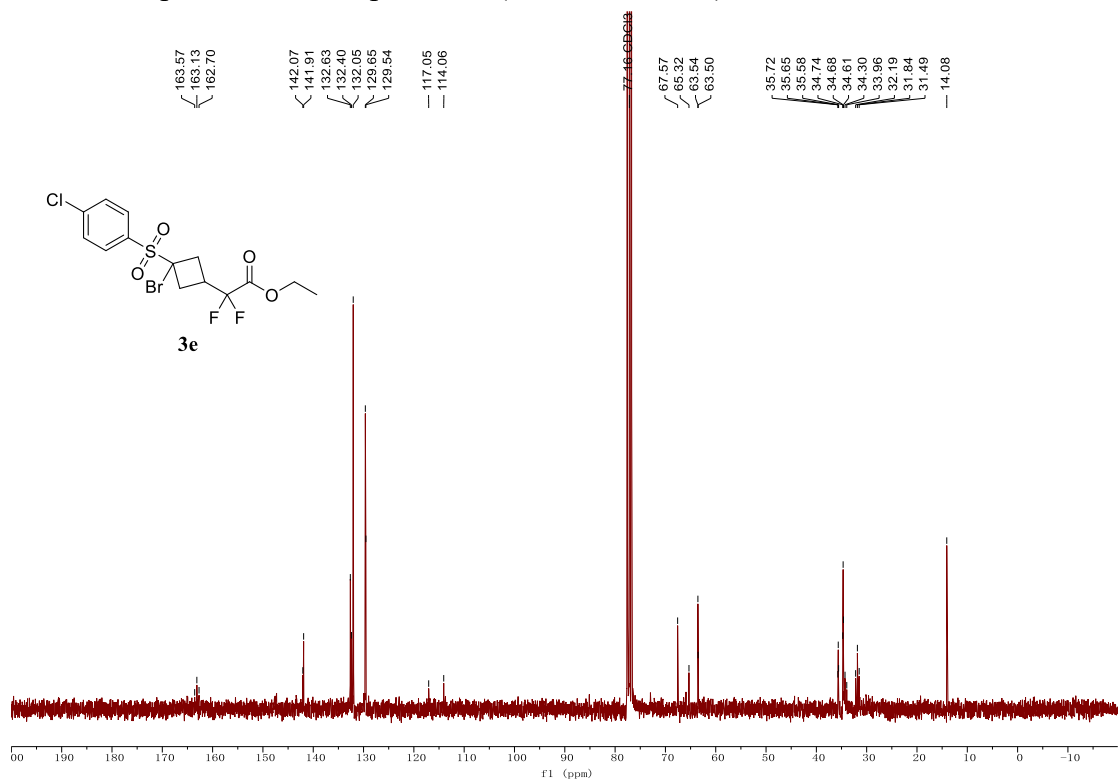

# $^{19}\text{F}$ NMR Spectrum of Compound **3e** (282 MHz, $\text{CDCl}_3$ )

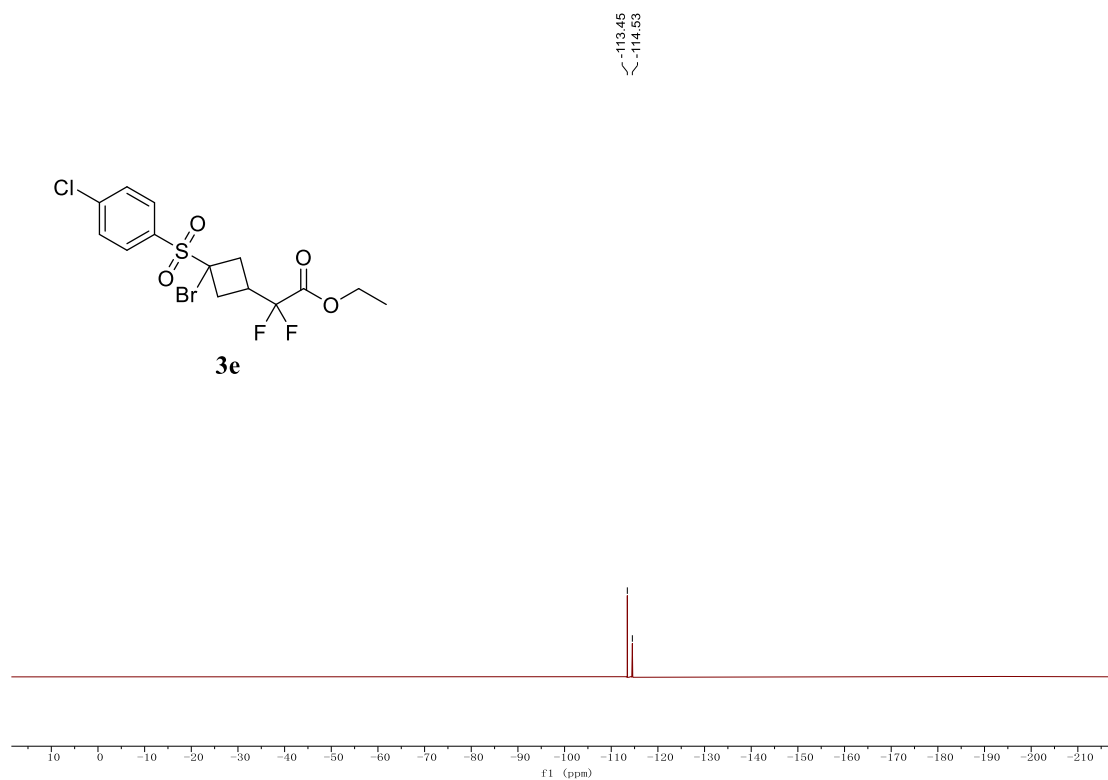

# $^1\text{H}$ NMR Spectrum of Compound **3f** (300 MHz, $\text{CDCl}_3$ )

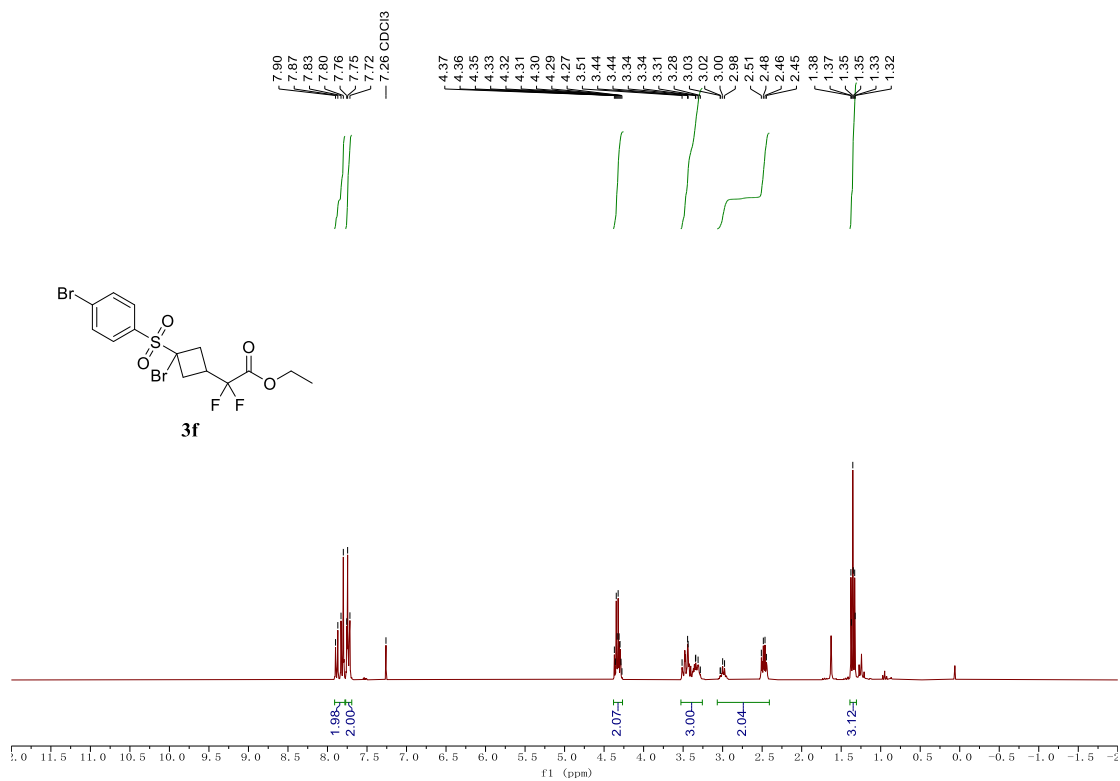

<sup>13</sup>C NMR Spectrum of Compound **3f** (101 MHz, CDCl<sub>3</sub>)

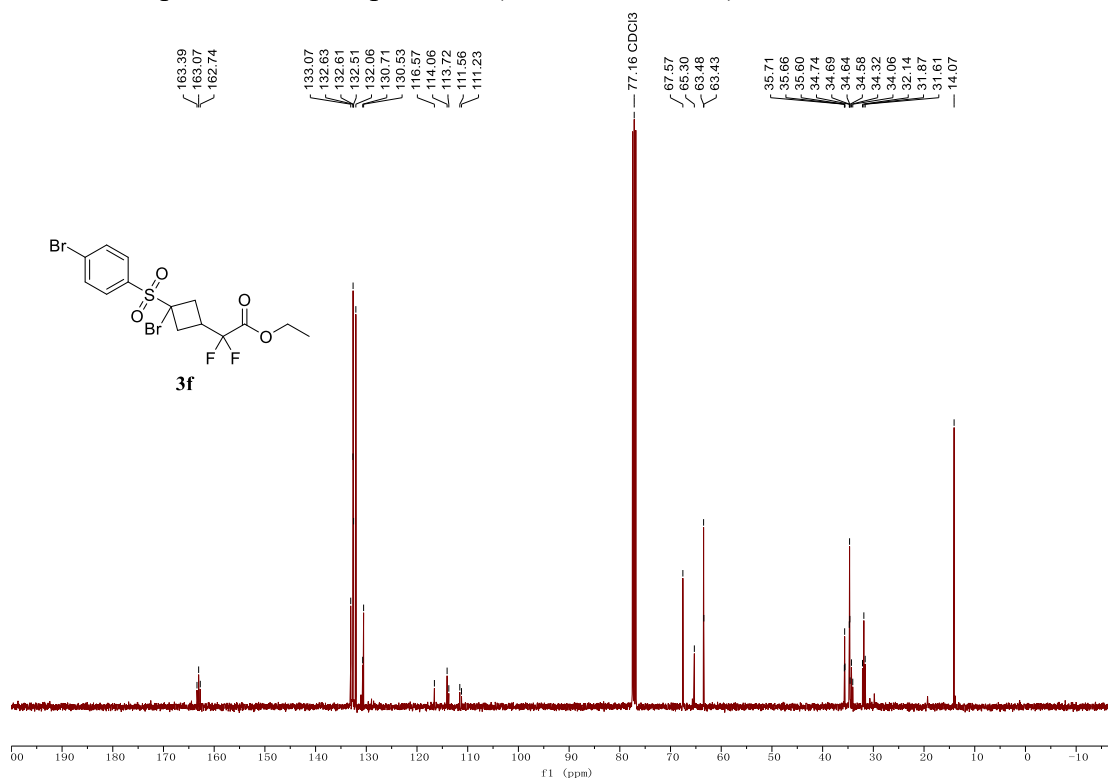

<sup>19</sup>F NMR Spectrum of Compound **3f** (282 MHz, CDCl<sub>3</sub>)

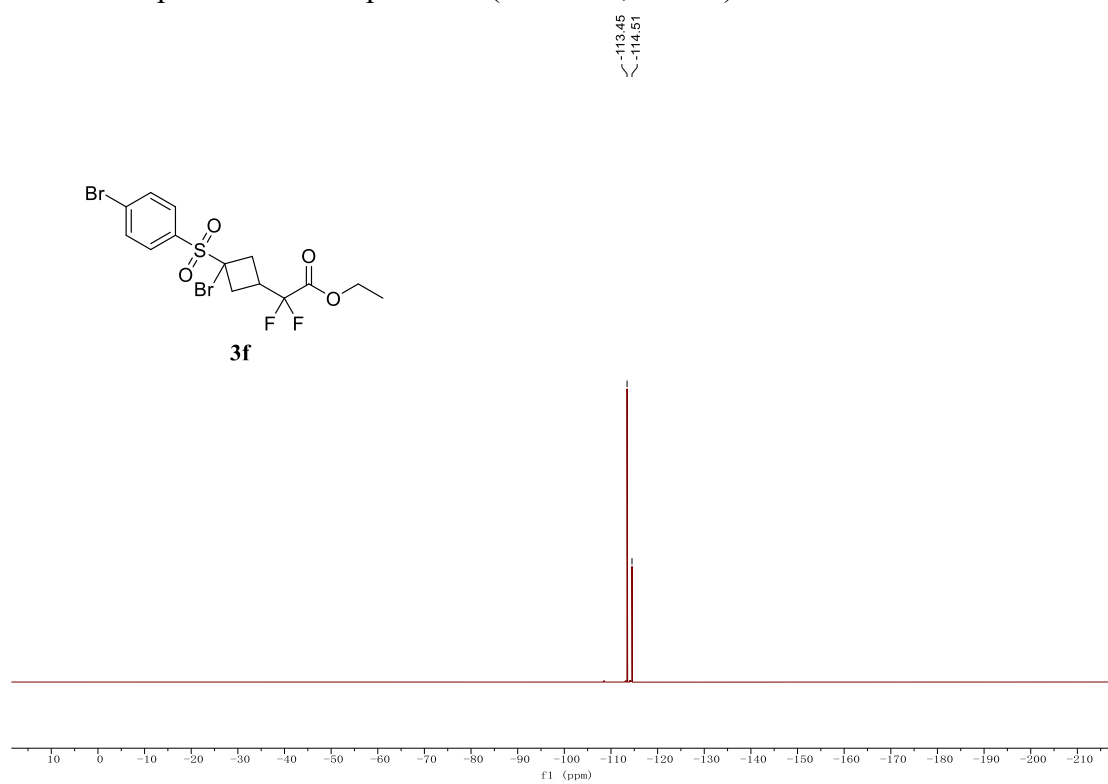



# $^1\text{H}$ NMR Spectrum of Compound **3g** (300 MHz, $\text{CDCl}_3$ )

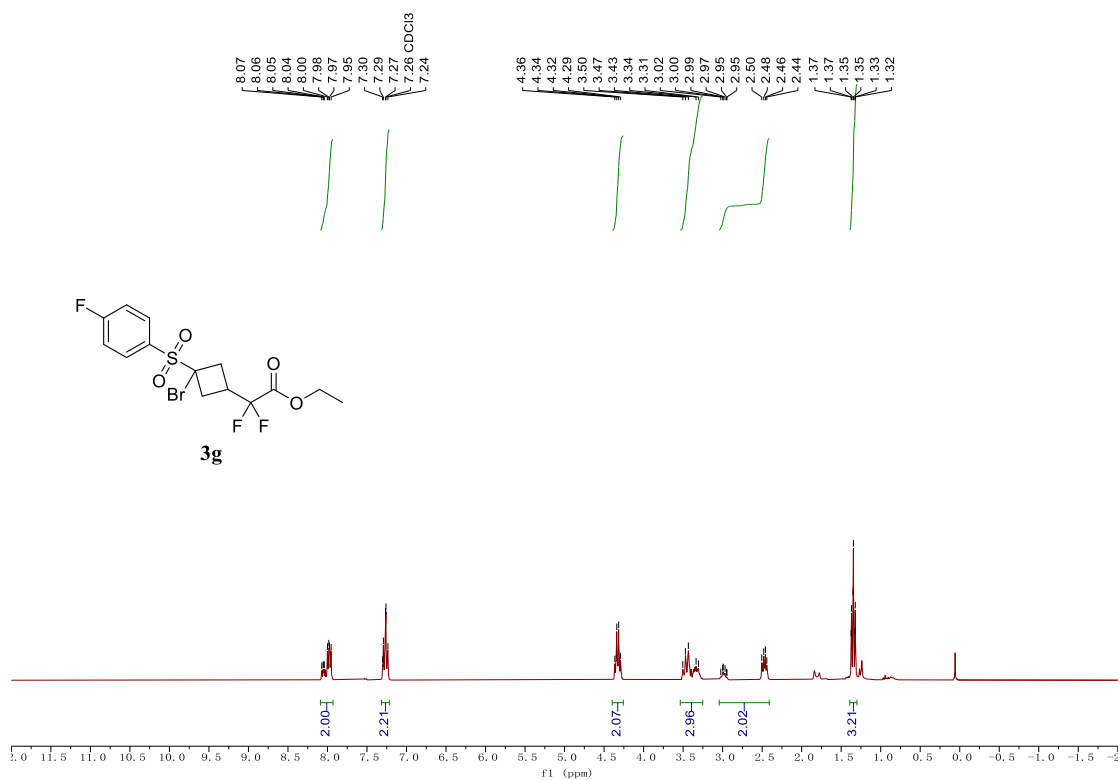

# $^{13}\text{C}$ NMR Spectrum of Compound **3g** (101 MHz, $\text{CDCl}_3$ )

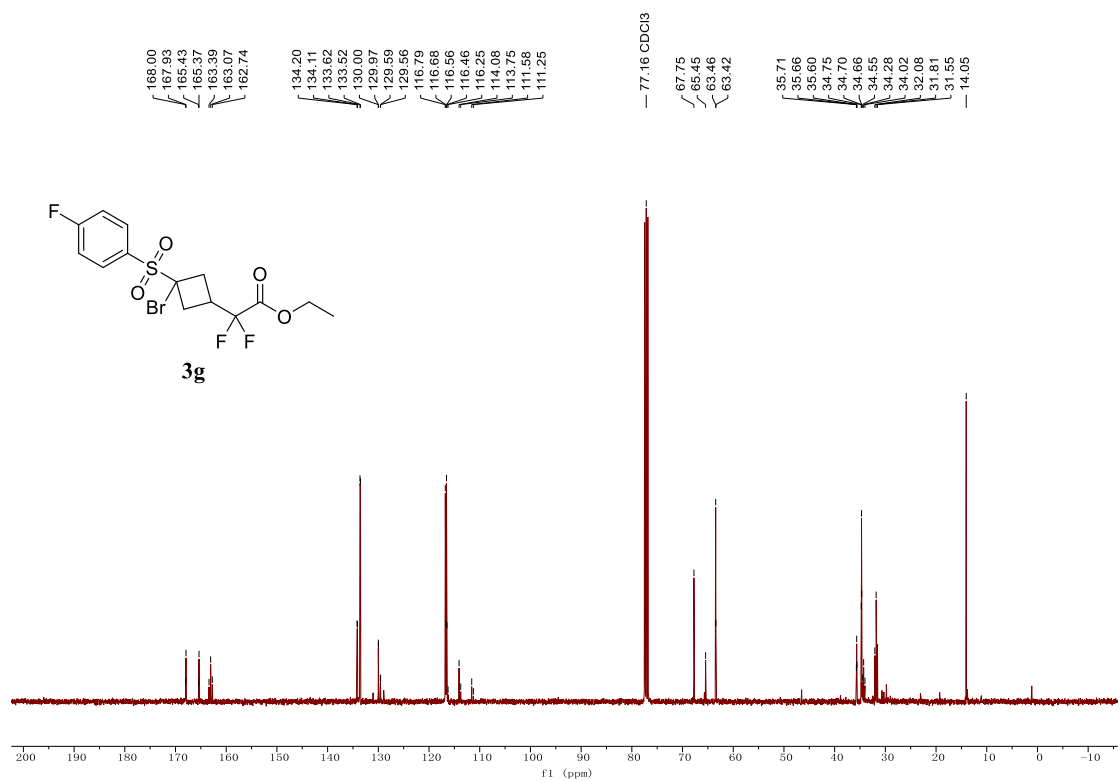

<sup>19</sup>F NMR Spectrum of Compound **3g** (282 MHz, CDCl<sub>3</sub>)

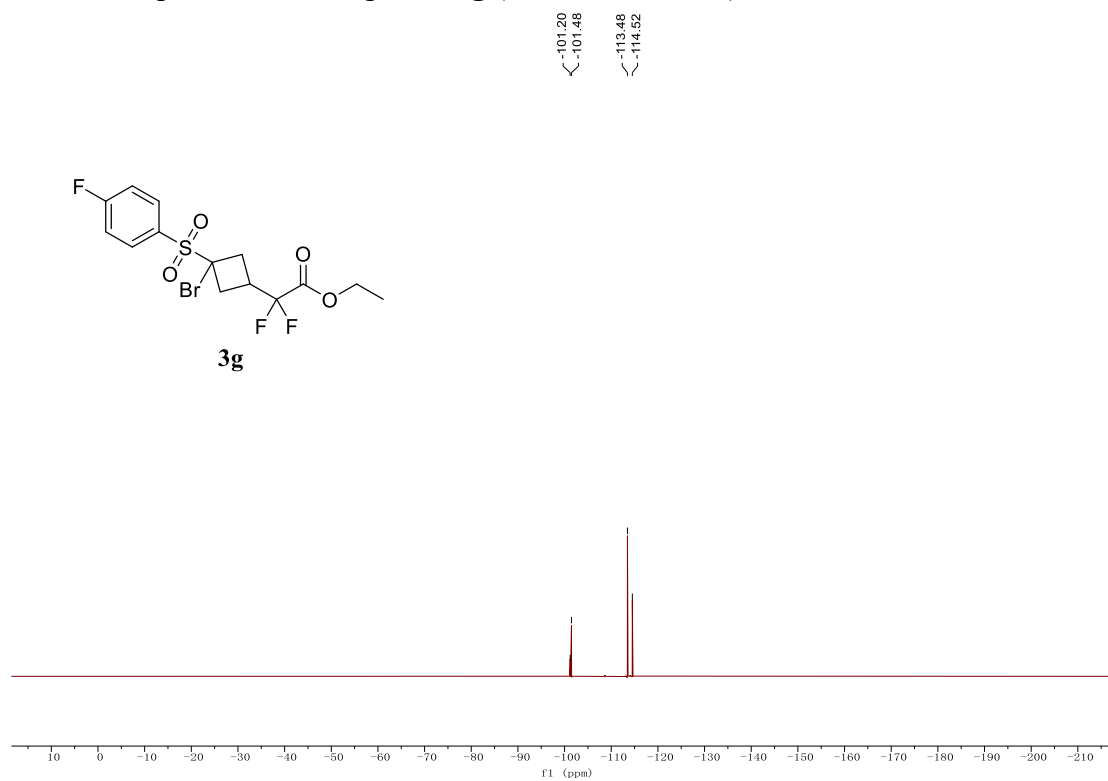

<sup>1</sup>H NMR Spectrum of Compound **3h** (300 MHz, CDCl<sub>3</sub>)

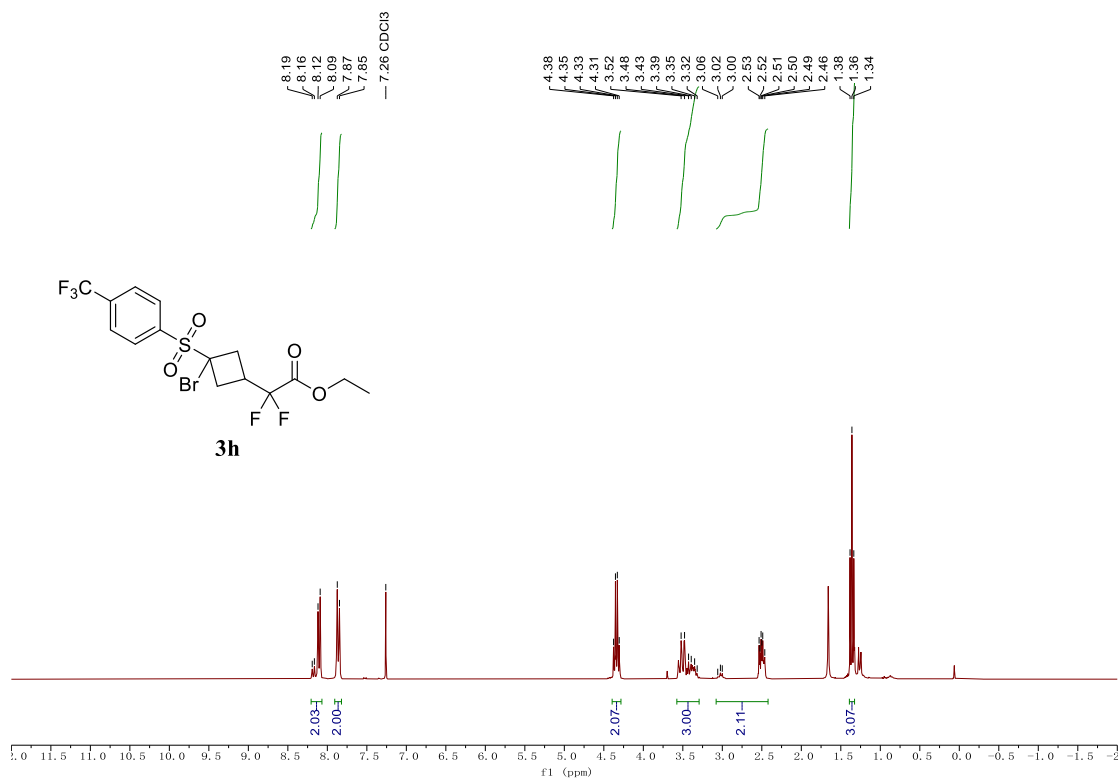

### <sup>13</sup>C NMR Spectrum of Compound **3h** (101 MHz, CDCl<sub>3</sub>)

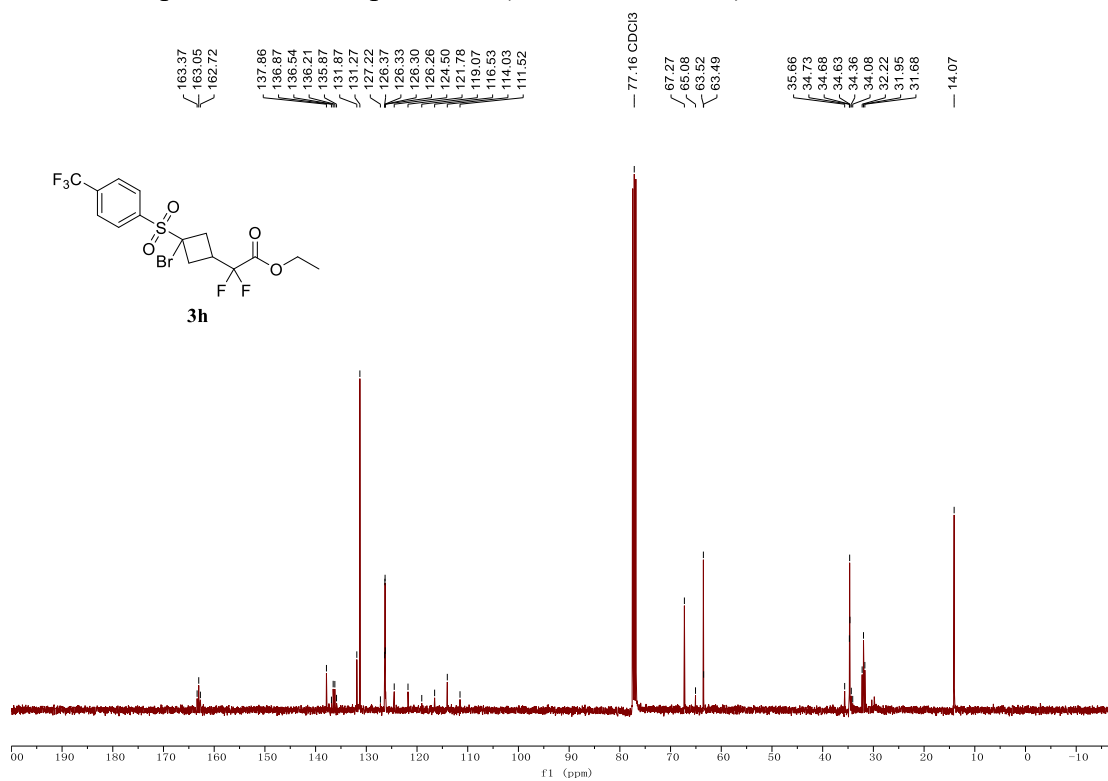

### <sup>19</sup>F NMR Spectrum of Compound **3h** (282 MHz, CDCl<sub>3</sub>)

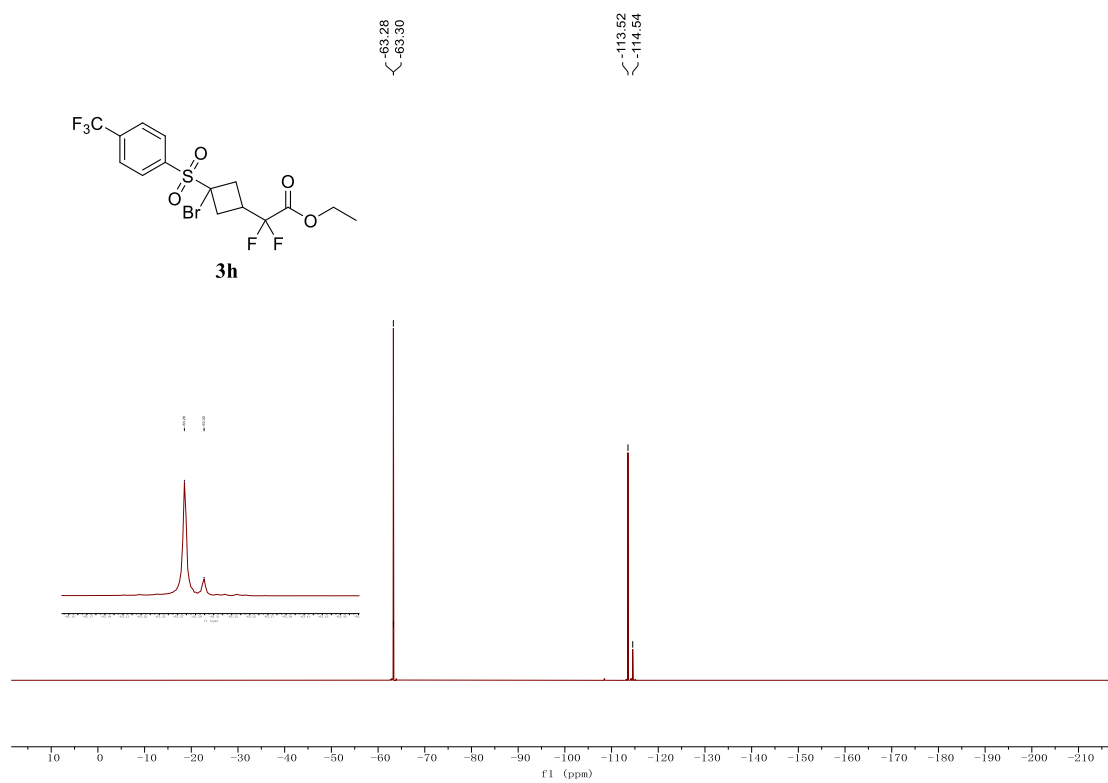

<sup>1</sup>H NMR Spectrum of Compound **3i** (400 MHz, CDCl<sub>3</sub>)

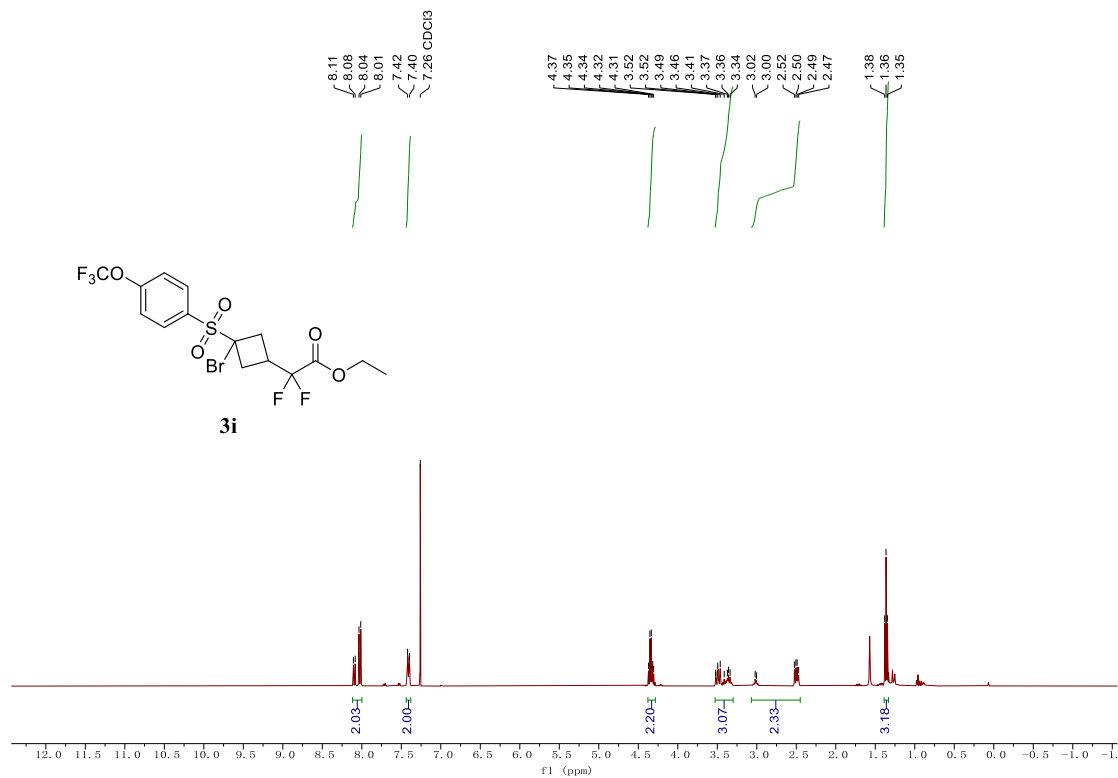

<sup>13</sup>C NMR Spectrum of Compound **3i** (101 MHz, CDCl<sub>3</sub>)

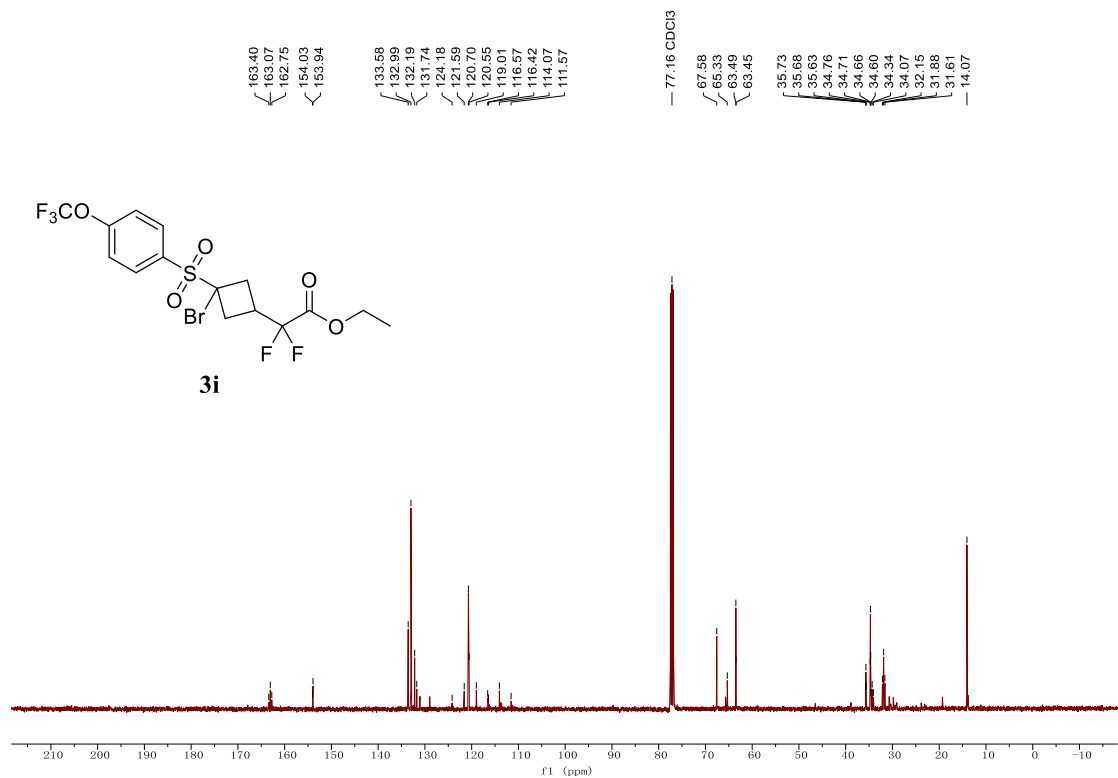

### $^{19}\text{F}$ NMR Spectrum of Compound **3i** (282 MHz, $\text{CDCl}_3$ )

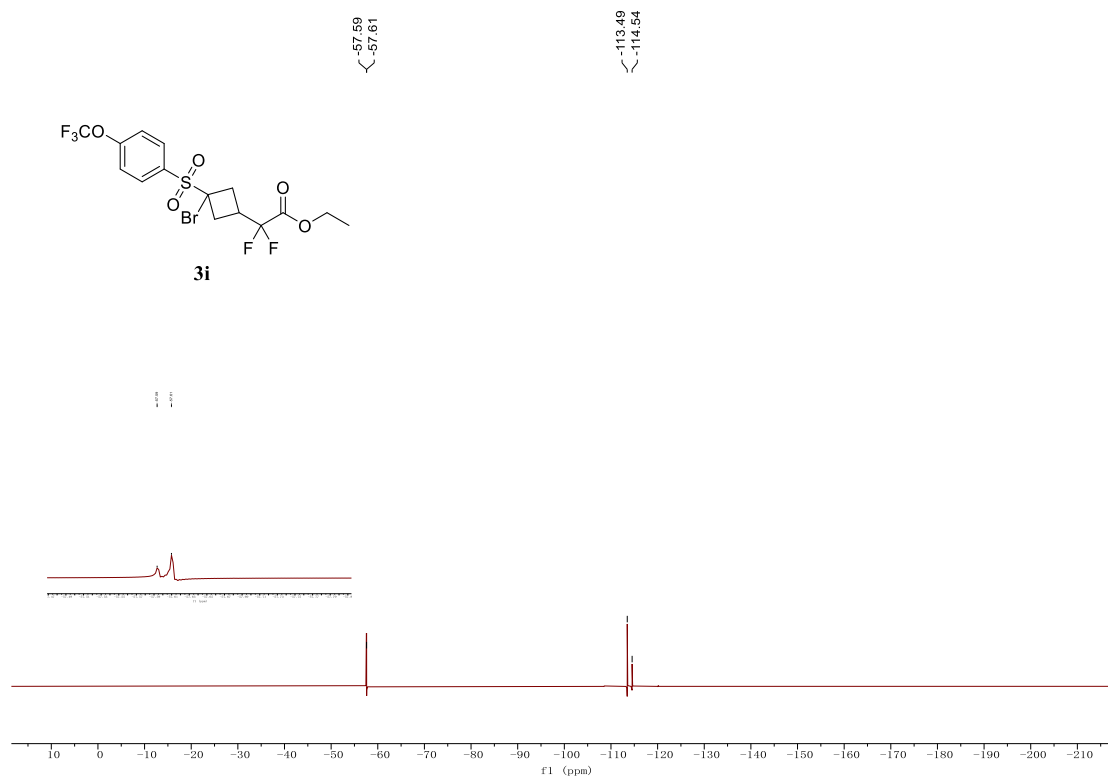

### $^1\text{H}$ NMR Spectrum of Compound **3j** (400 MHz, $\text{CDCl}_3$ )

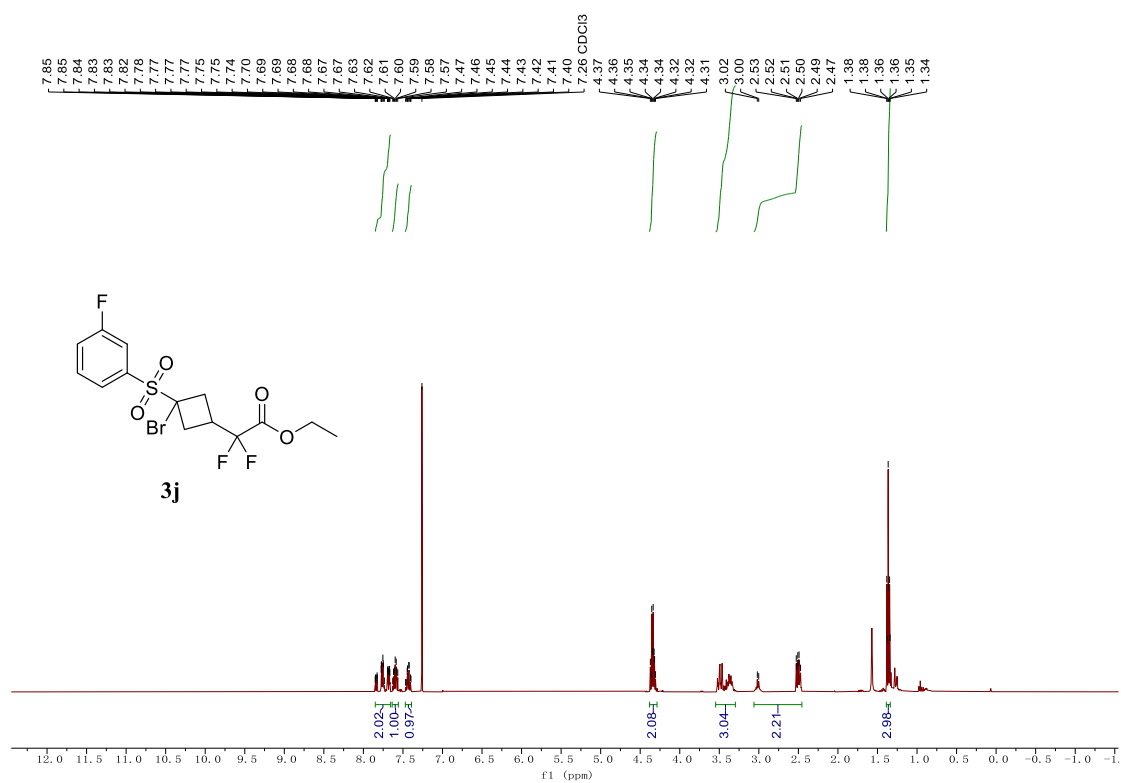

<sup>13</sup>C NMR Spectrum of Compound **3j** (101 MHz, CDCl<sub>3</sub>)

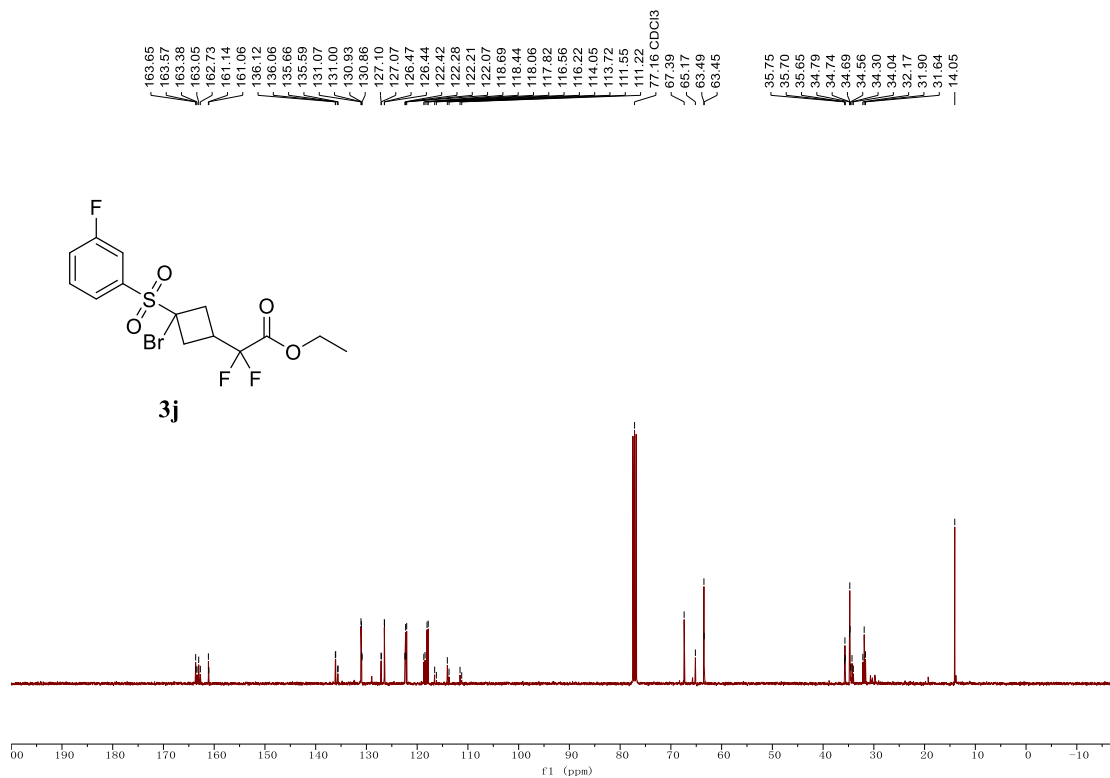

<sup>19</sup>F NMR Spectrum of Compound **3j** (282 MHz, CDCl<sub>3</sub>)

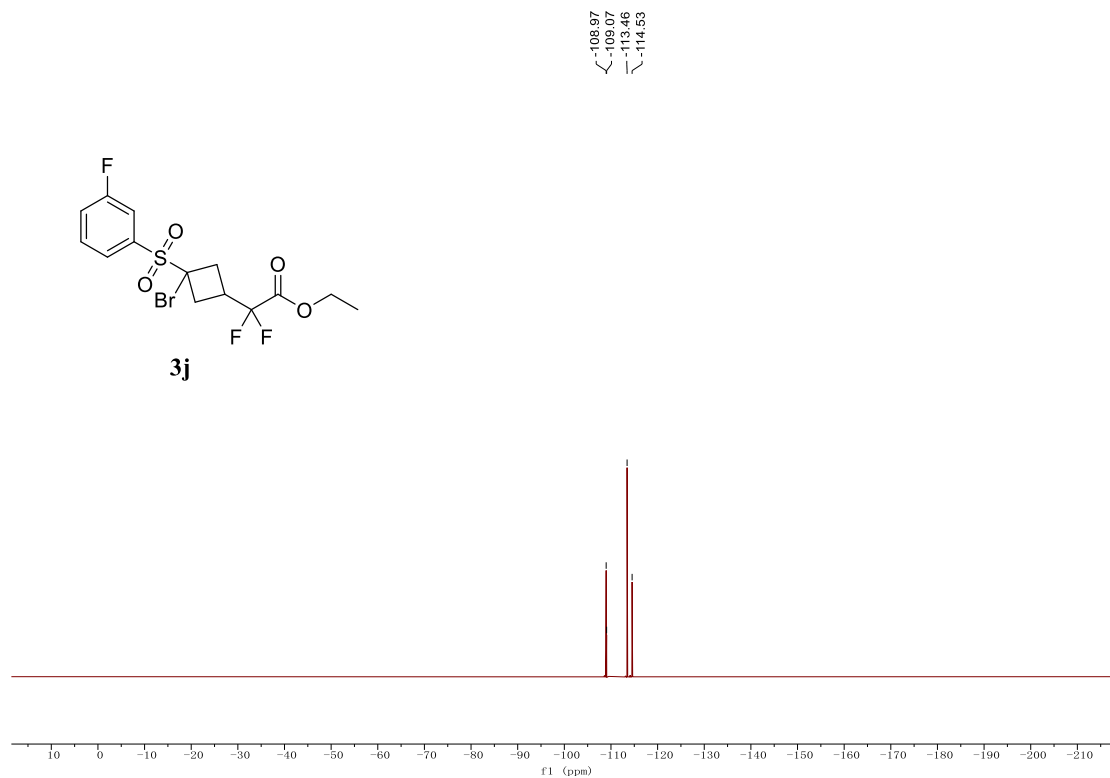

$^1\text{H}$  NMR Spectrum of Compound **3k** (300 MHz,  $\text{CDCl}_3$ )

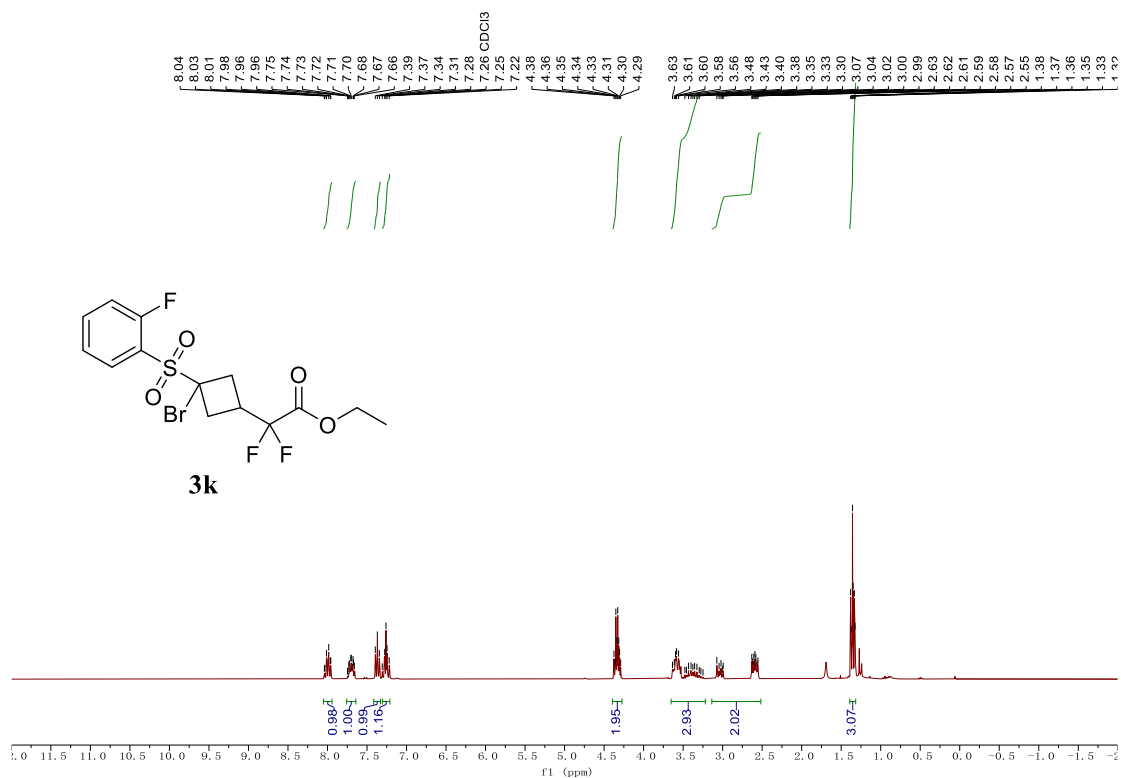

$^{13}\text{C}$  NMR Spectrum of Compound **3k** (101 MHz,  $\text{CDCl}_3$ )

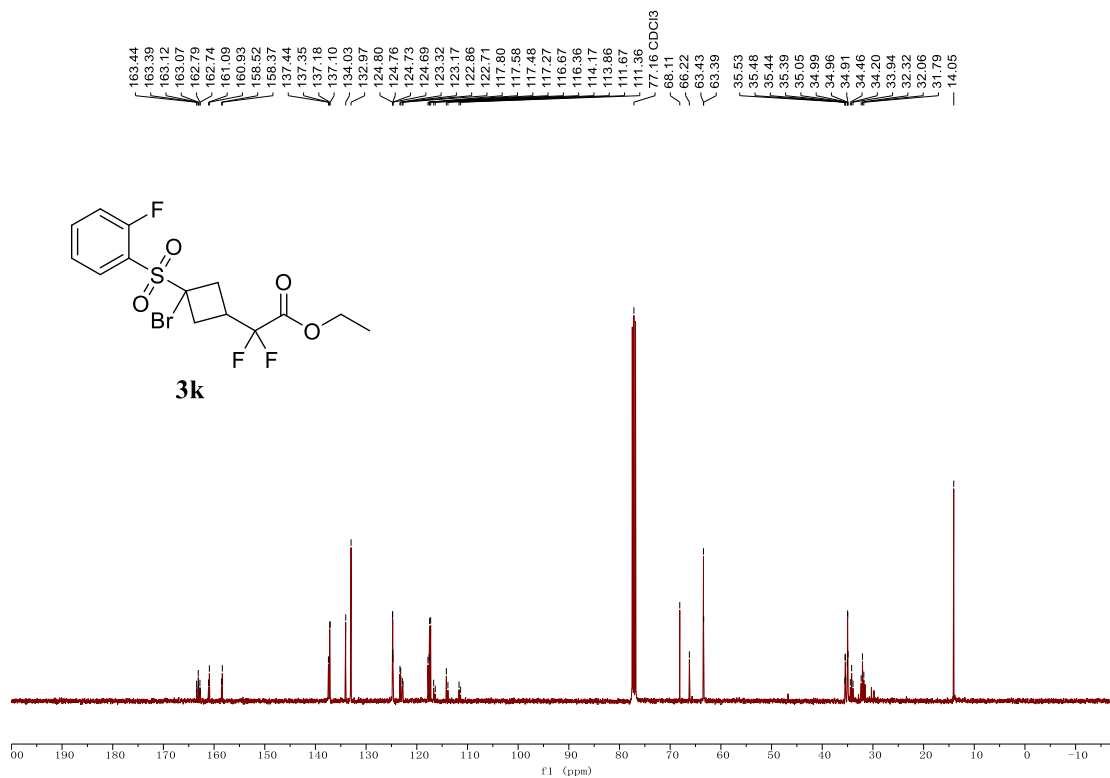

<sup>19</sup>F NMR Spectrum of Compound **3k** (282 MHz, CDCl<sub>3</sub>)

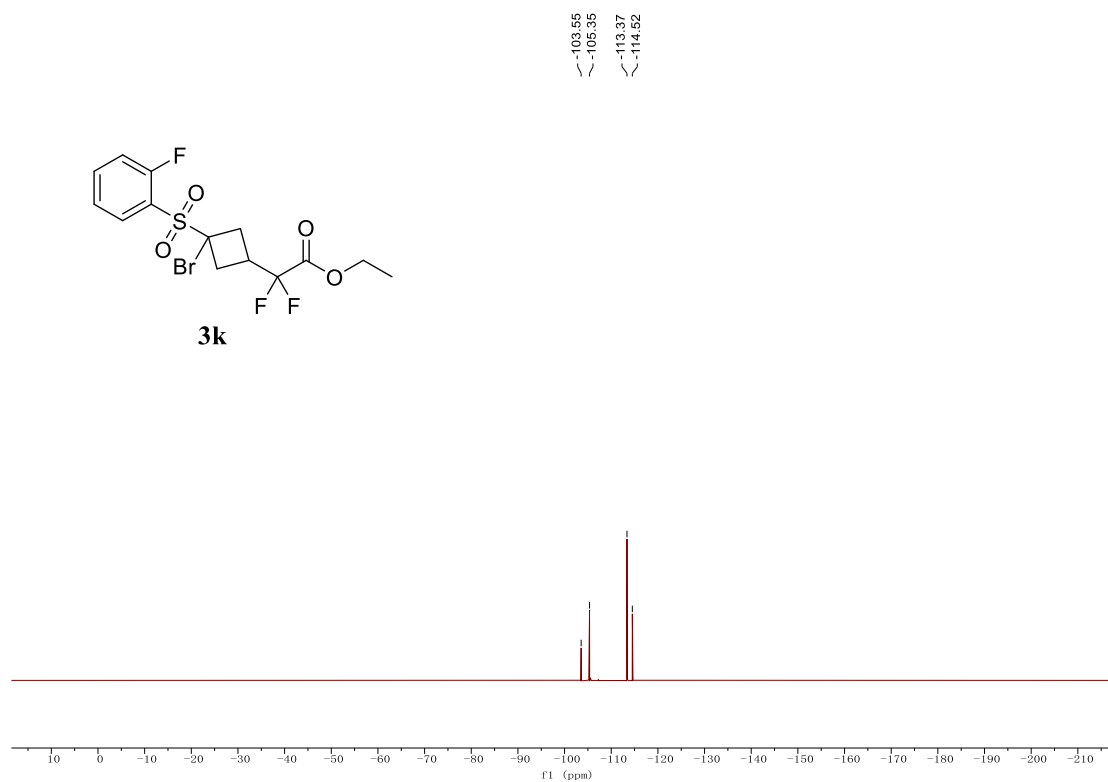

<sup>1</sup>H NMR Spectrum of Compound **3l** (300 MHz, CDCl<sub>3</sub>)

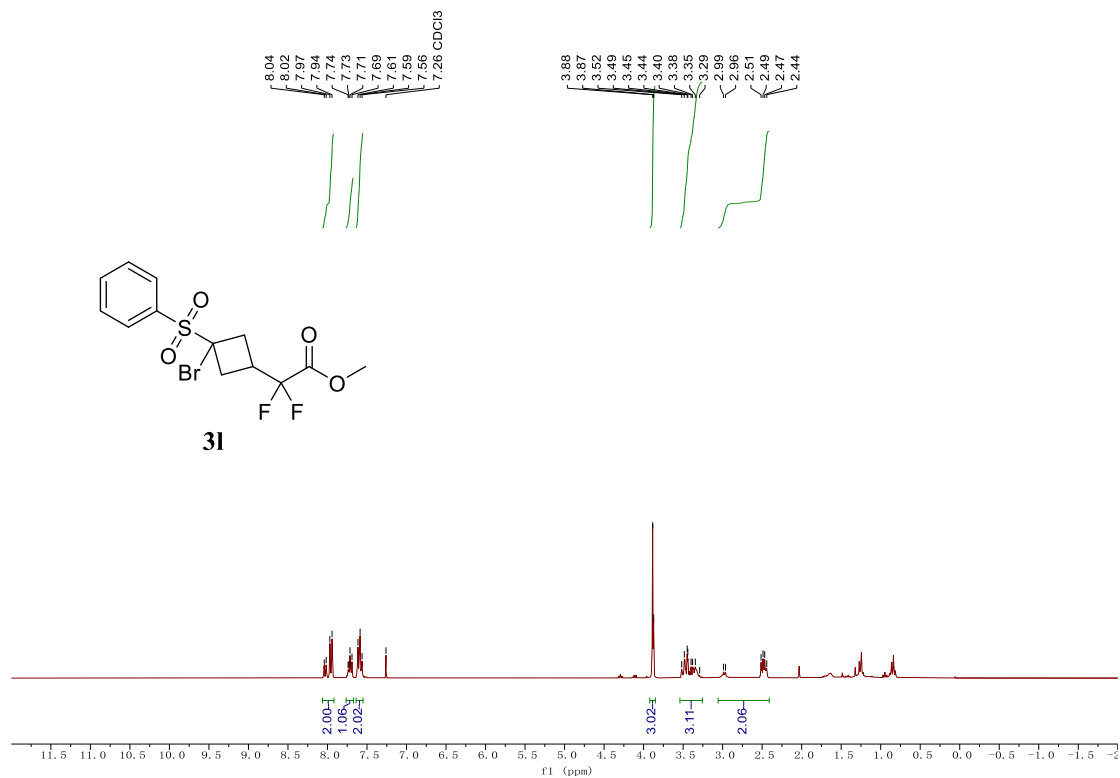



<sup>13</sup>C NMR Spectrum of Compound **31** (101 MHz, CDCl<sub>3</sub>)

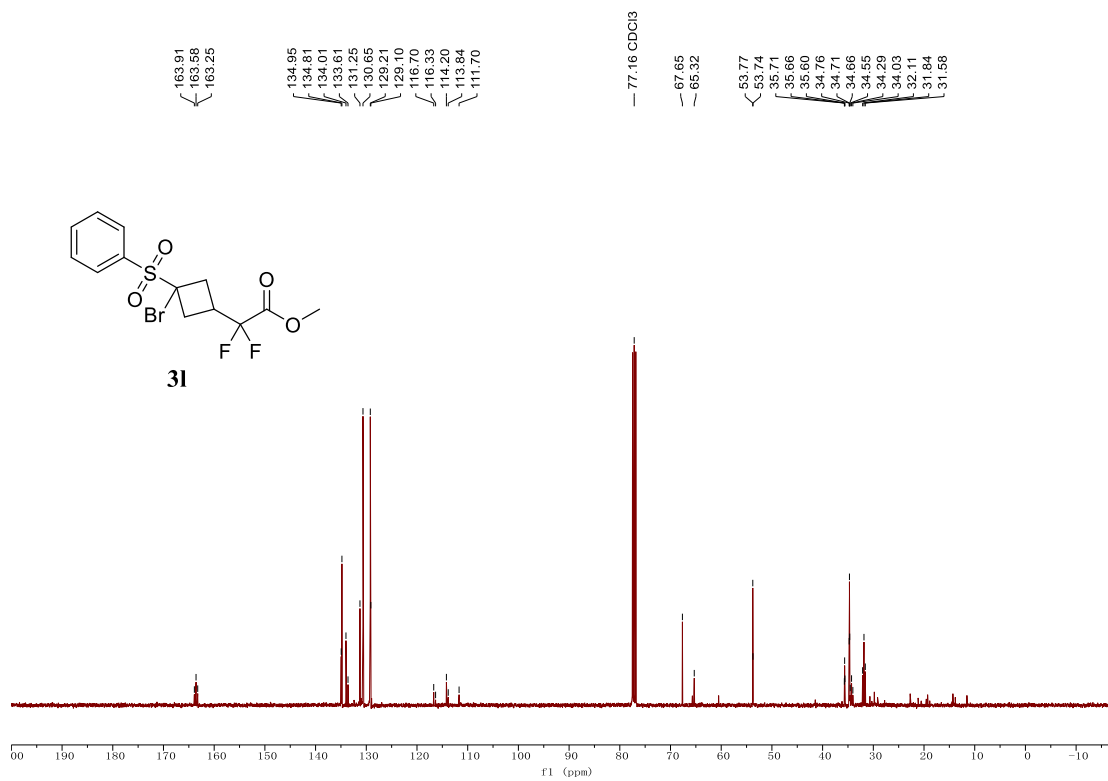

<sup>19</sup>F NMR Spectrum of Compound **31** (282 MHz, CDCl<sub>3</sub>)

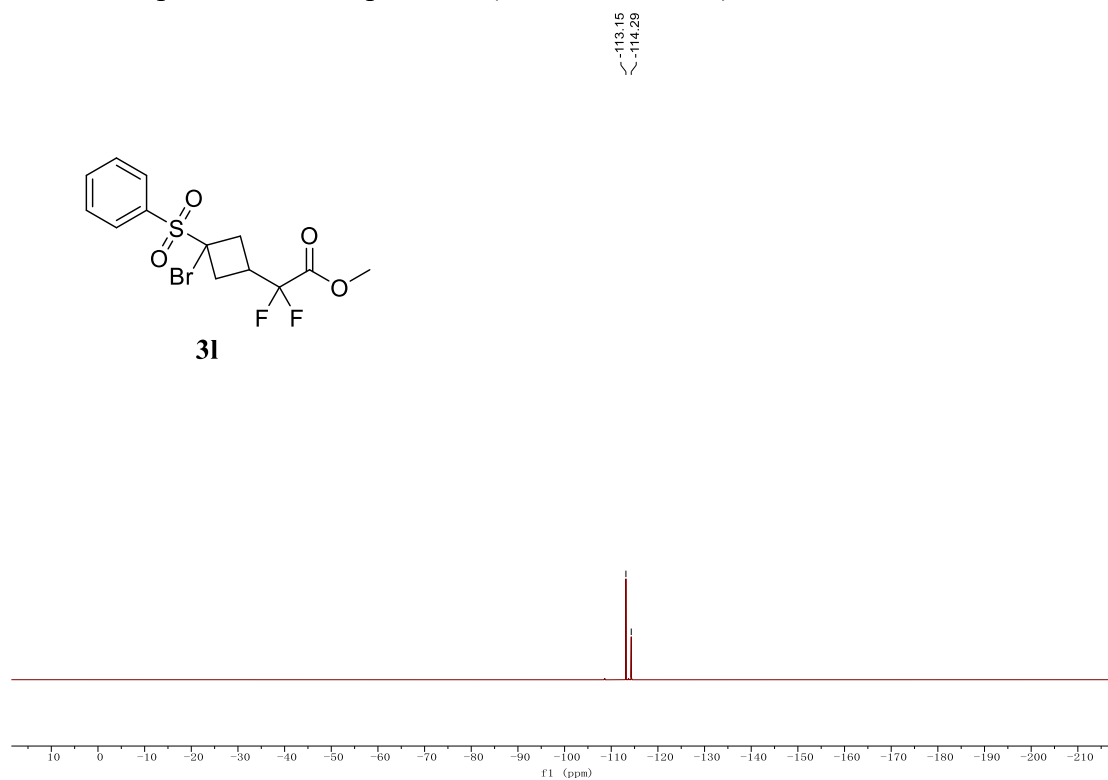

<sup>1</sup>H NMR Spectrum of Compound **3m** (300 MHz, CDCl<sub>3</sub>)

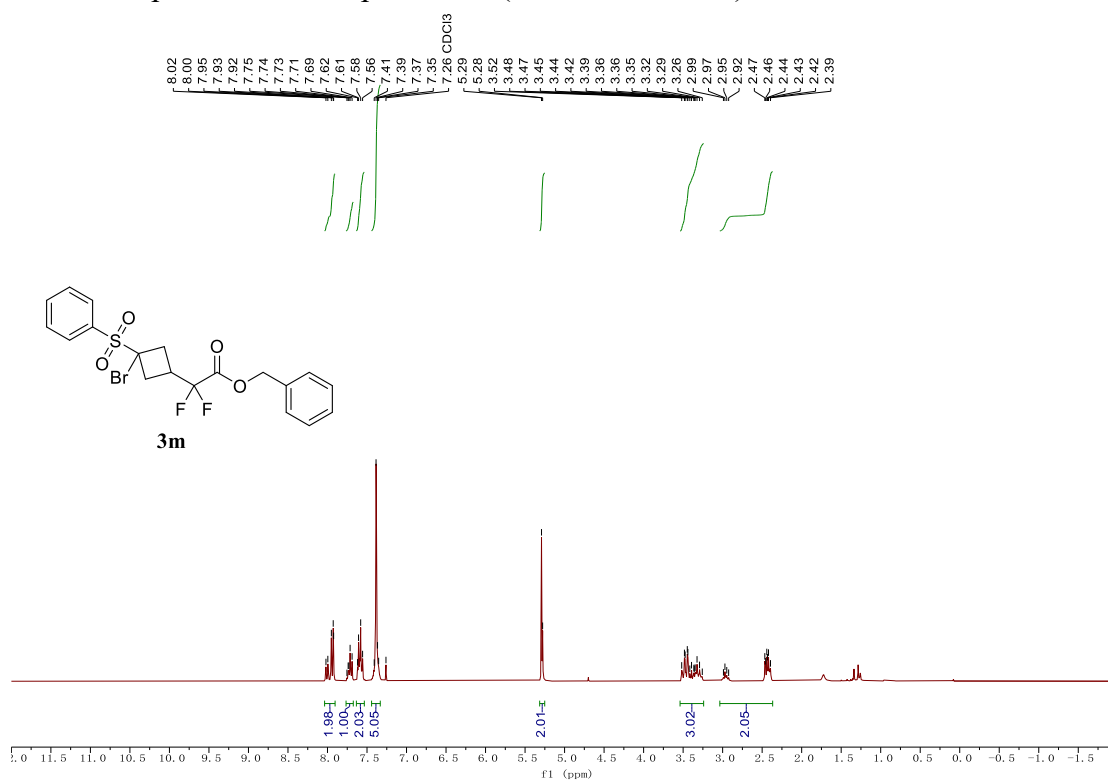

<sup>13</sup>C NMR Spectrum of Compound **3m** (101 MHz, CDCl<sub>3</sub>)

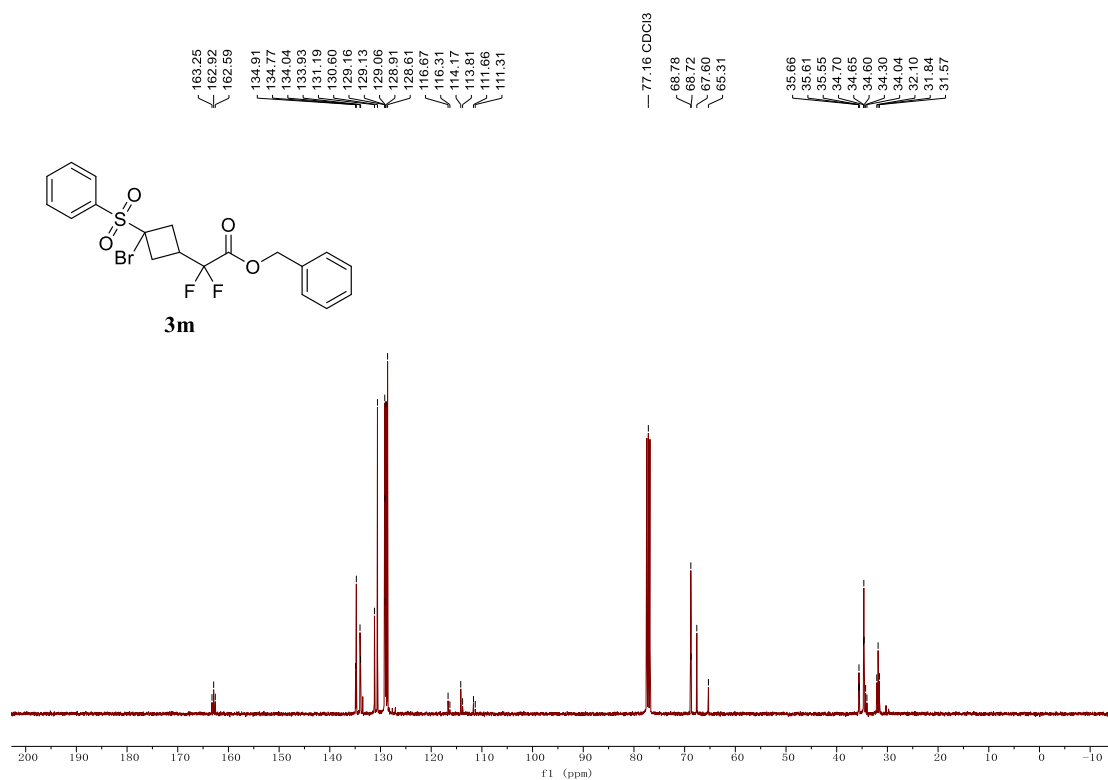

<sup>19</sup>F NMR Spectrum of Compound **3m** (282 MHz, CDCl<sub>3</sub>)

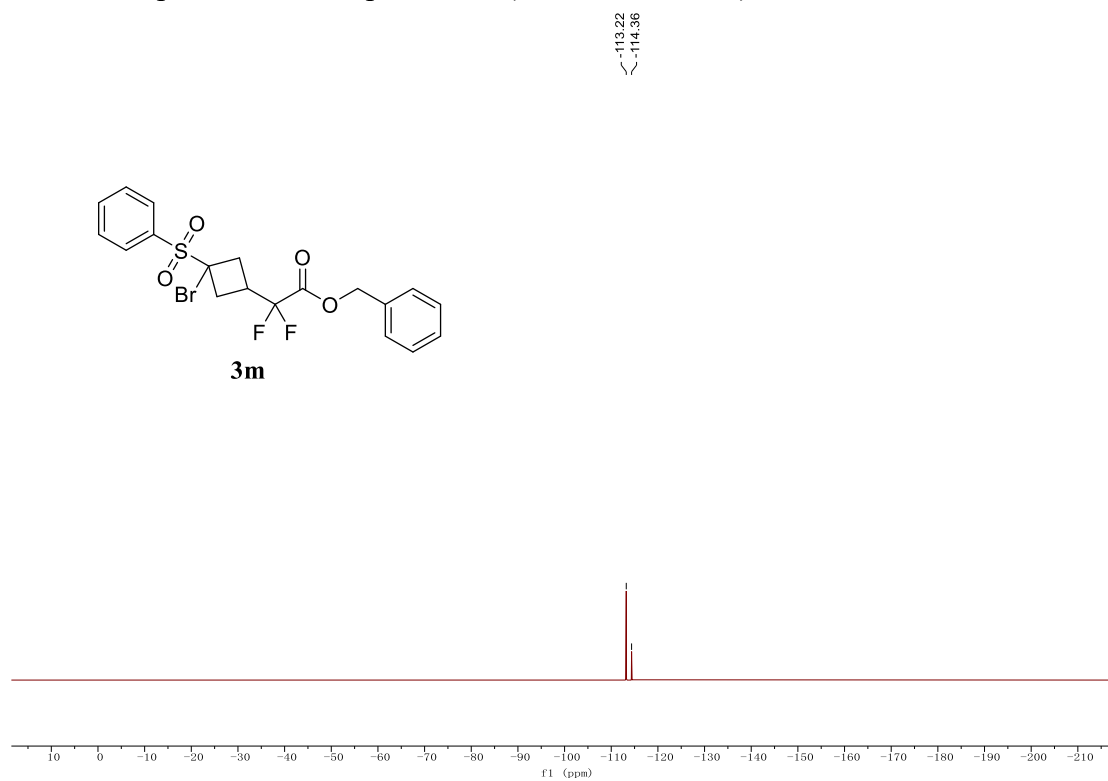

<sup>1</sup>H NMR Spectrum of Compound **3n** (300 MHz, CDCl<sub>3</sub>)

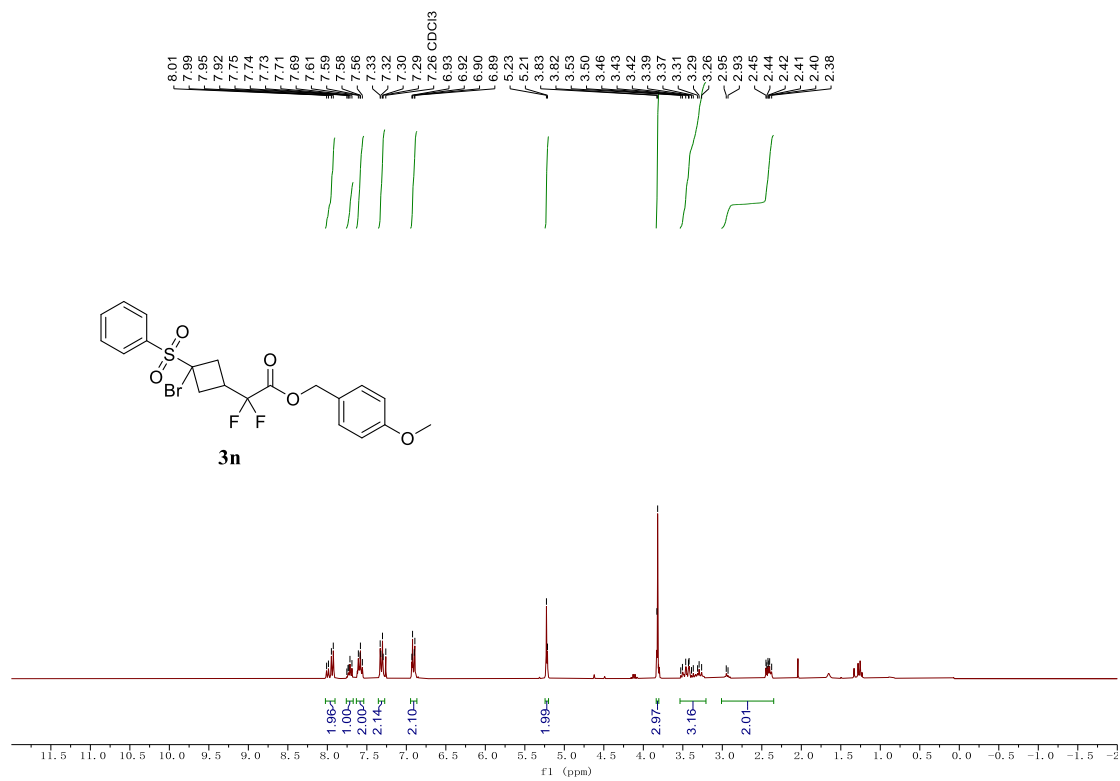

### <sup>13</sup>C NMR Spectrum of Compound **3n** (101 MHz, CDCl<sub>3</sub>)

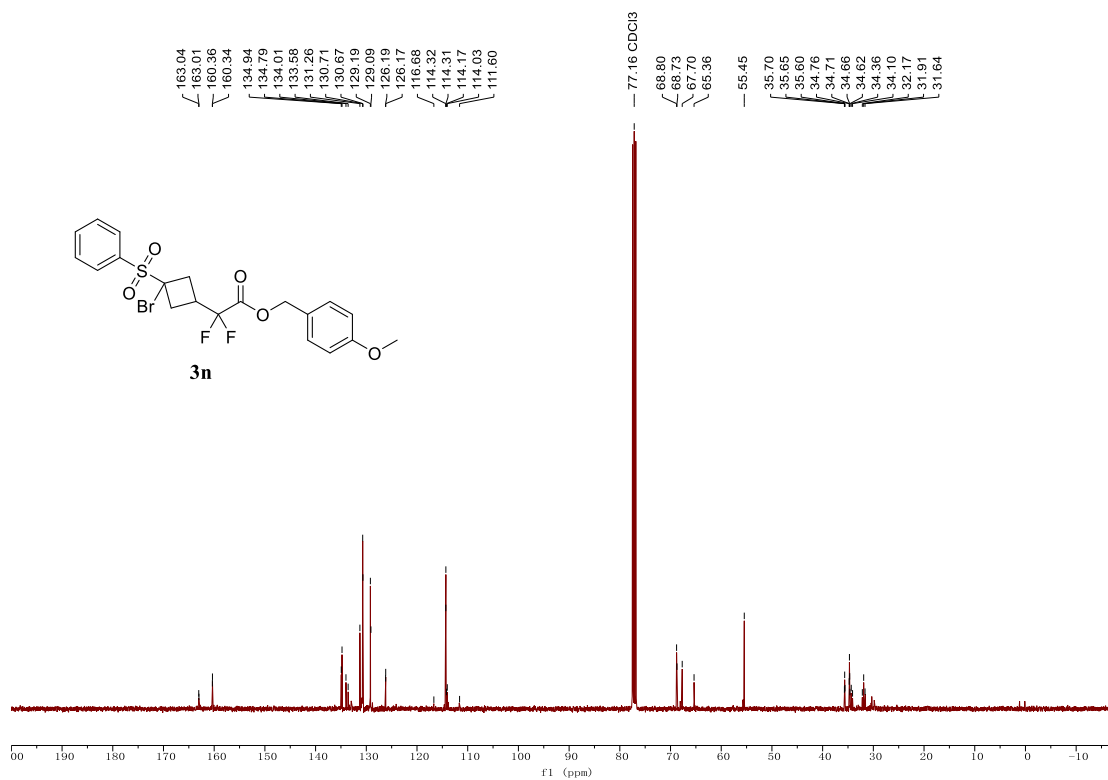

### <sup>19</sup>F NMR Spectrum of Compound **3n** (282 MHz, CDCl<sub>3</sub>)

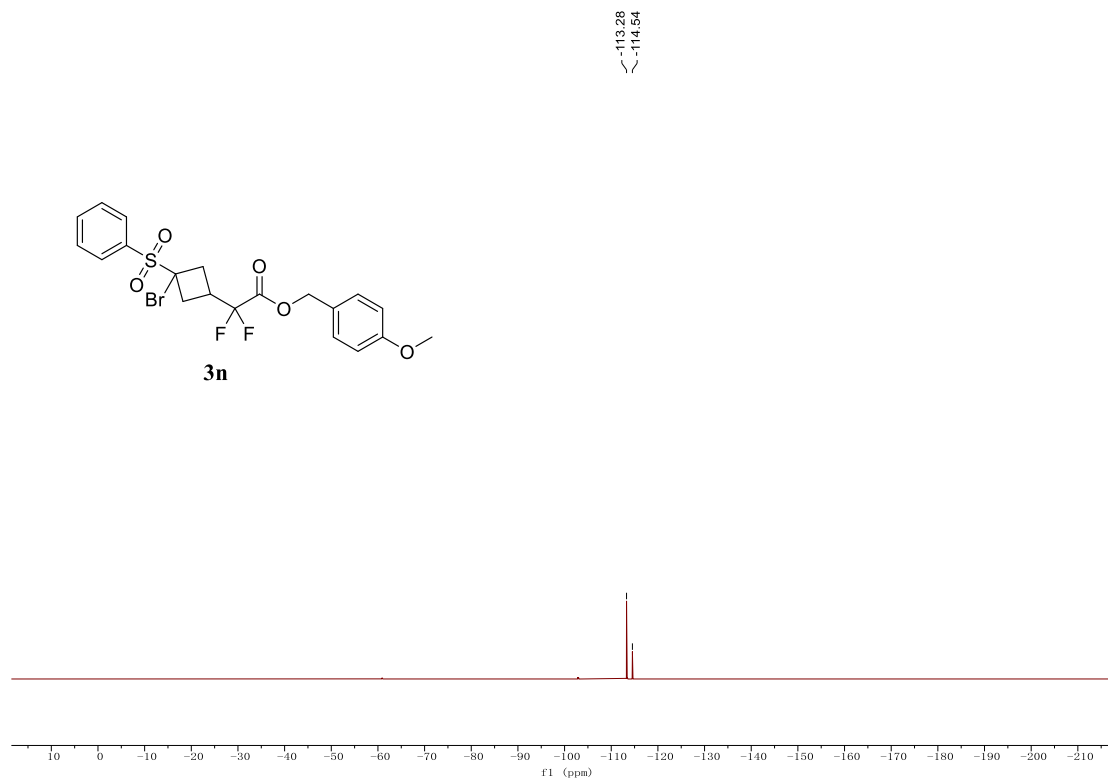

# $^1\text{H}$ NMR Spectrum of Compound **3o** (300 MHz, $\text{CDCl}_3$ )

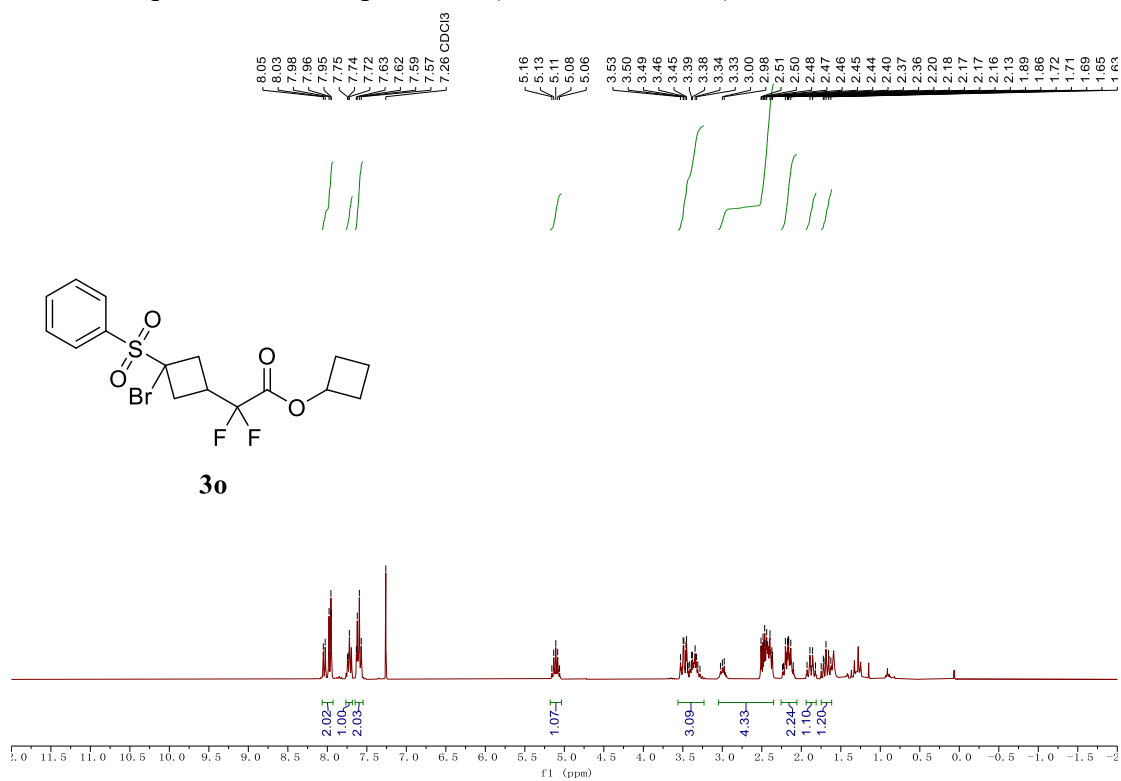

# $^{13}\text{C}$ NMR Spectrum of Compound **3o** (101 MHz, $\text{CDCl}_3$ )

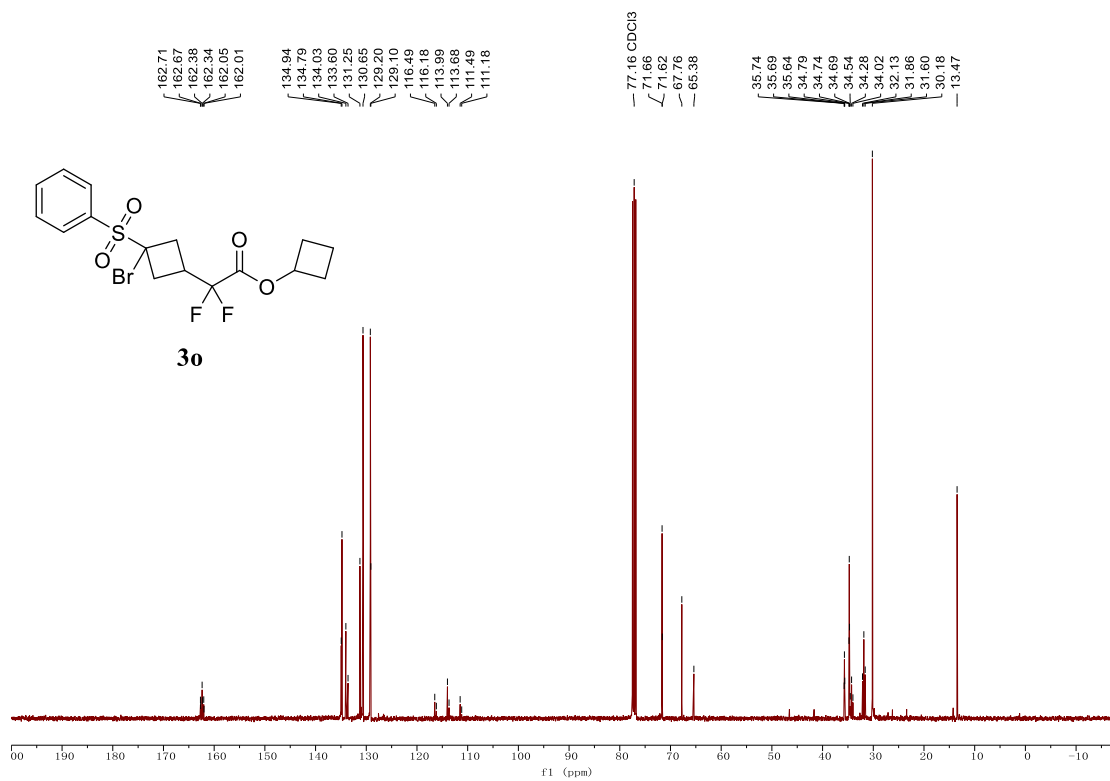

<sup>19</sup>F NMR Spectrum of Compound **3o** (282 MHz, CDCl<sub>3</sub>)

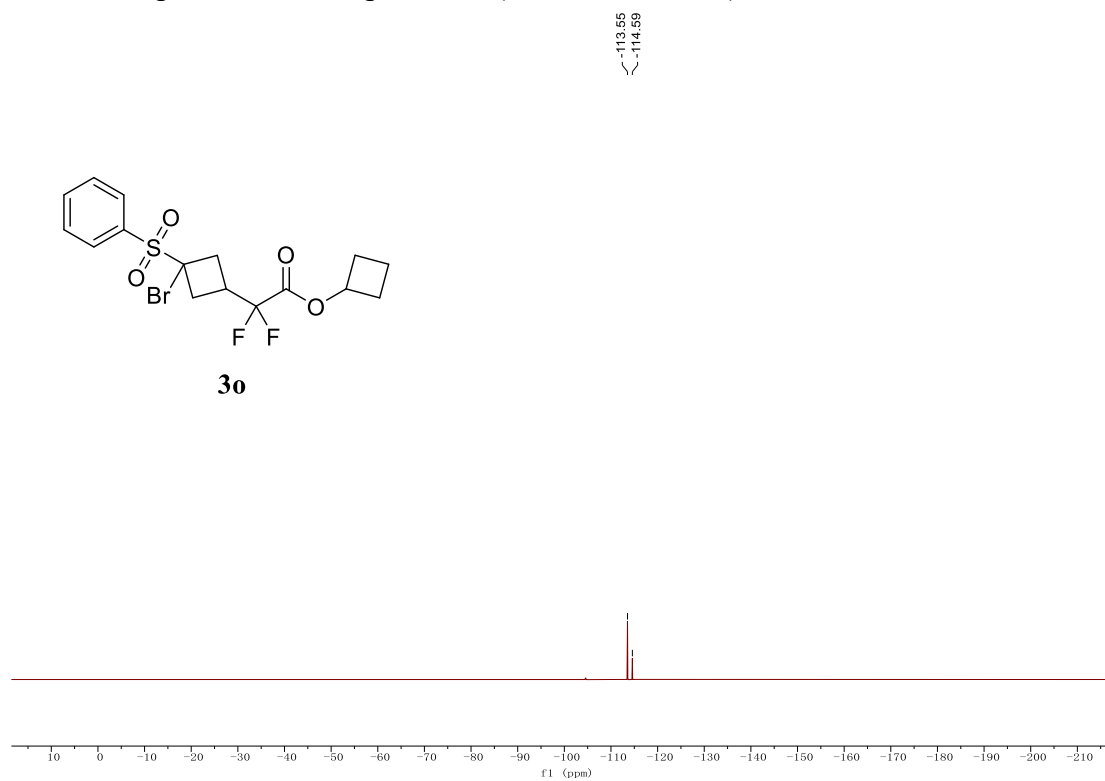

<sup>1</sup>H NMR Spectrum of Compound **3p** (300 MHz, CDCl<sub>3</sub>)

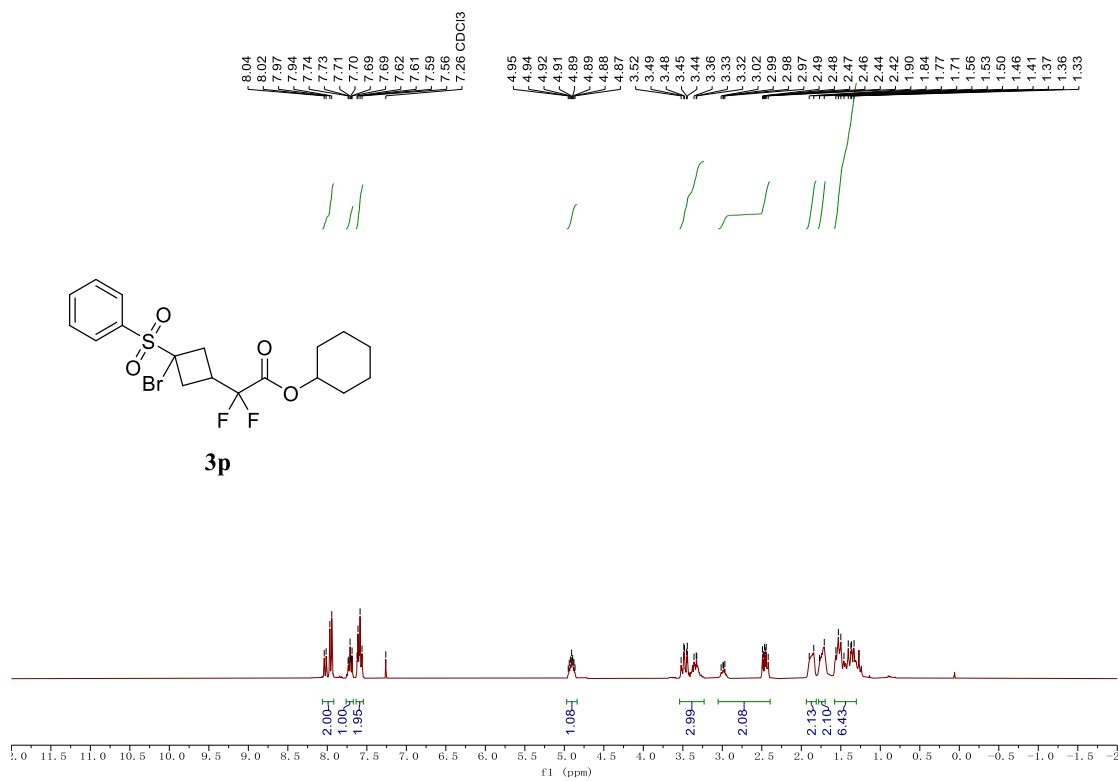

### <sup>13</sup>C NMR Spectrum of Compound **3p** (101 MHz, CDCl<sub>3</sub>)

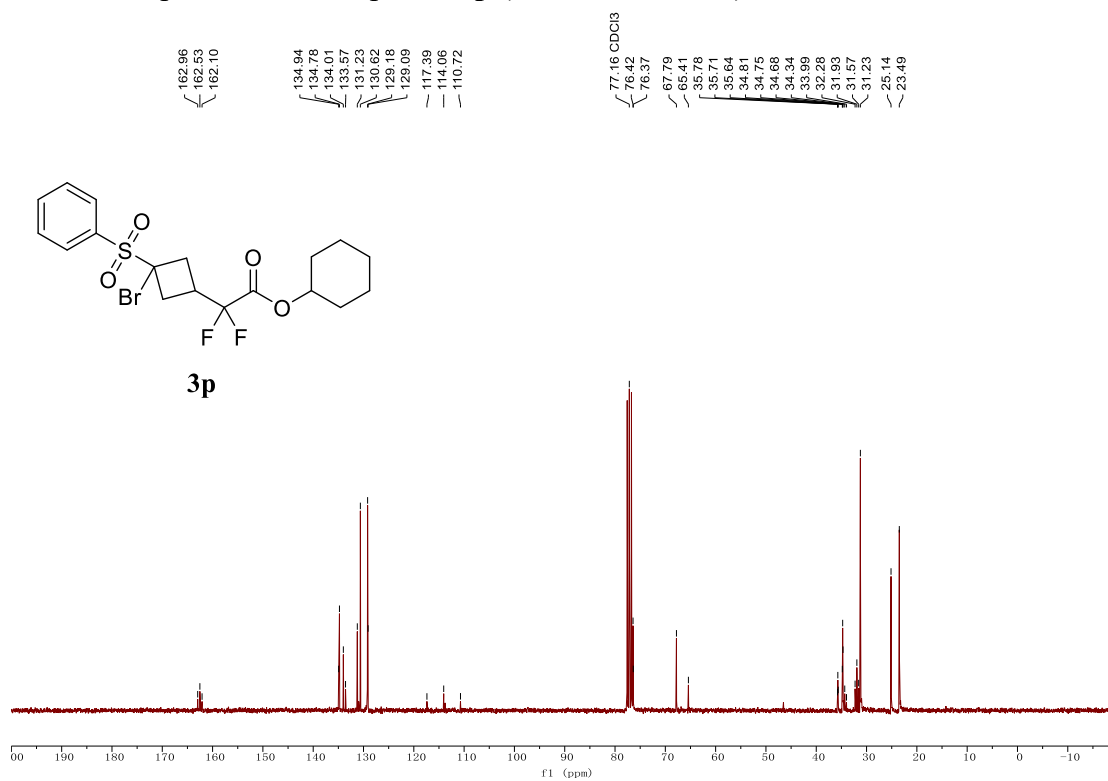

### <sup>19</sup>F NMR Spectrum of Compound **3p** (282 MHz, CDCl<sub>3</sub>)

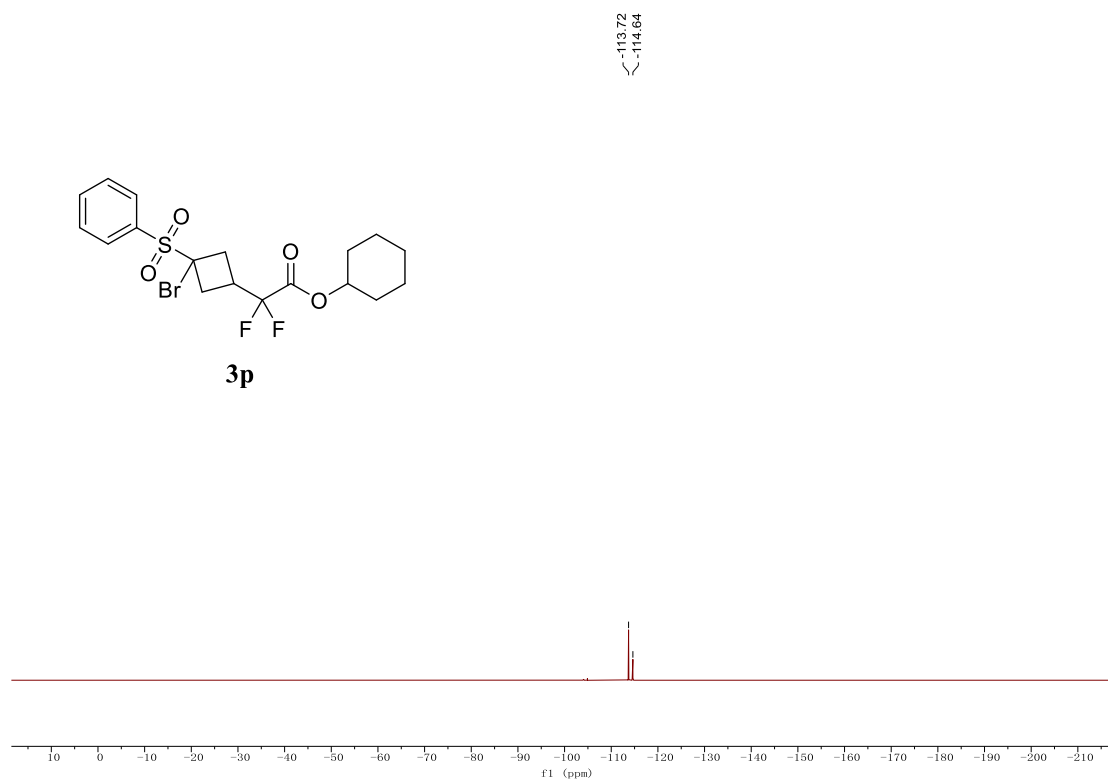

# <sup>1</sup>H NMR Spectrum of Compound **3q** (300 MHz, CDCl<sub>3</sub>)

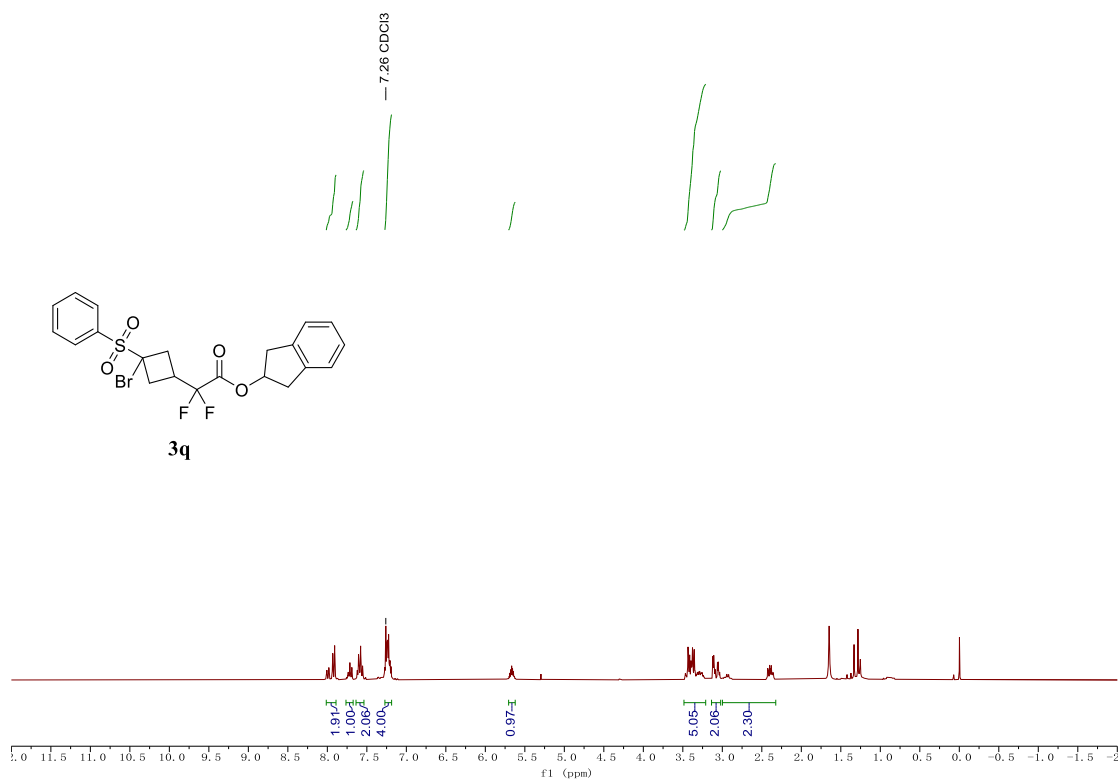

# <sup>13</sup>C NMR Spectrum of Compound **3q** (75 MHz, CDCl<sub>3</sub>)

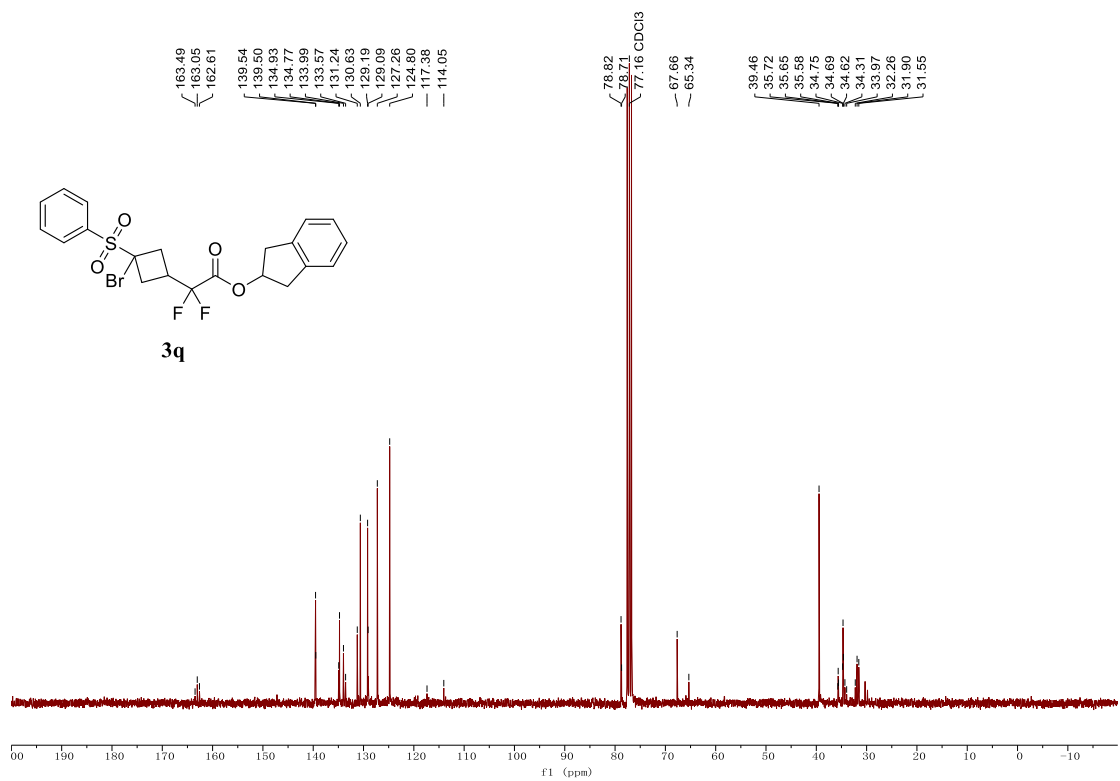



<sup>19</sup>F NMR Spectrum of Compound **3q** (282 MHz, CDCl<sub>3</sub>)

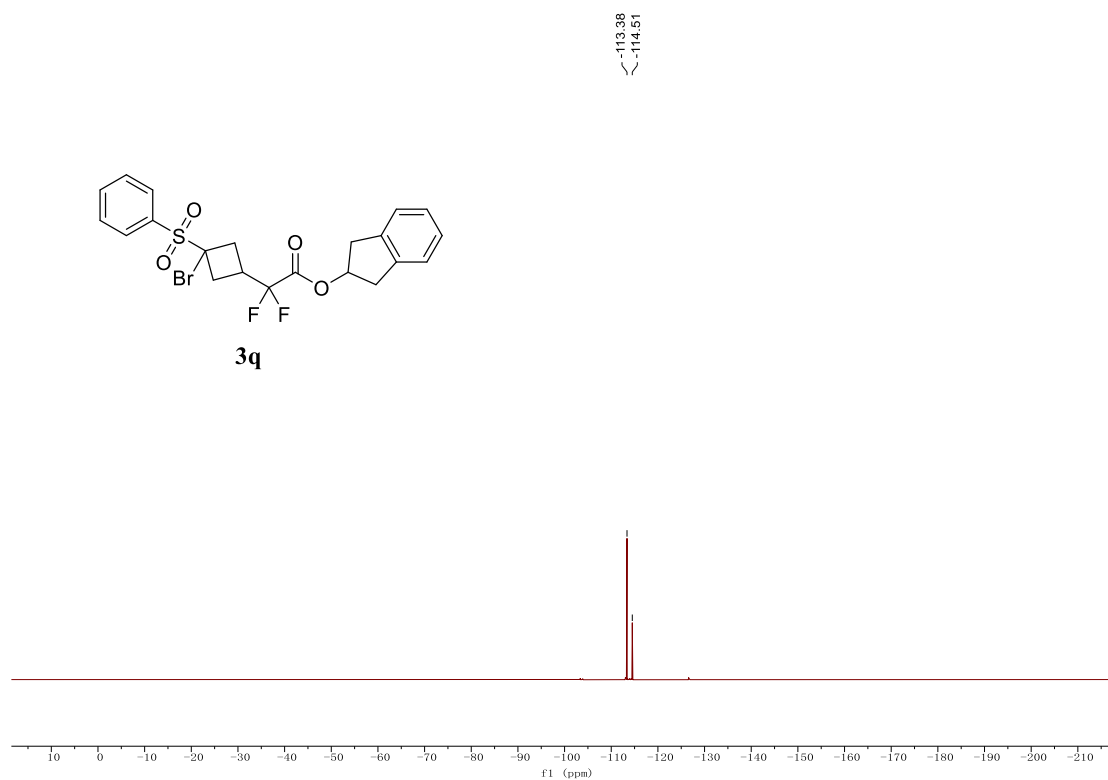

<sup>1</sup>H NMR Spectrum of Compound **3r** (300 MHz, CDCl<sub>3</sub>)

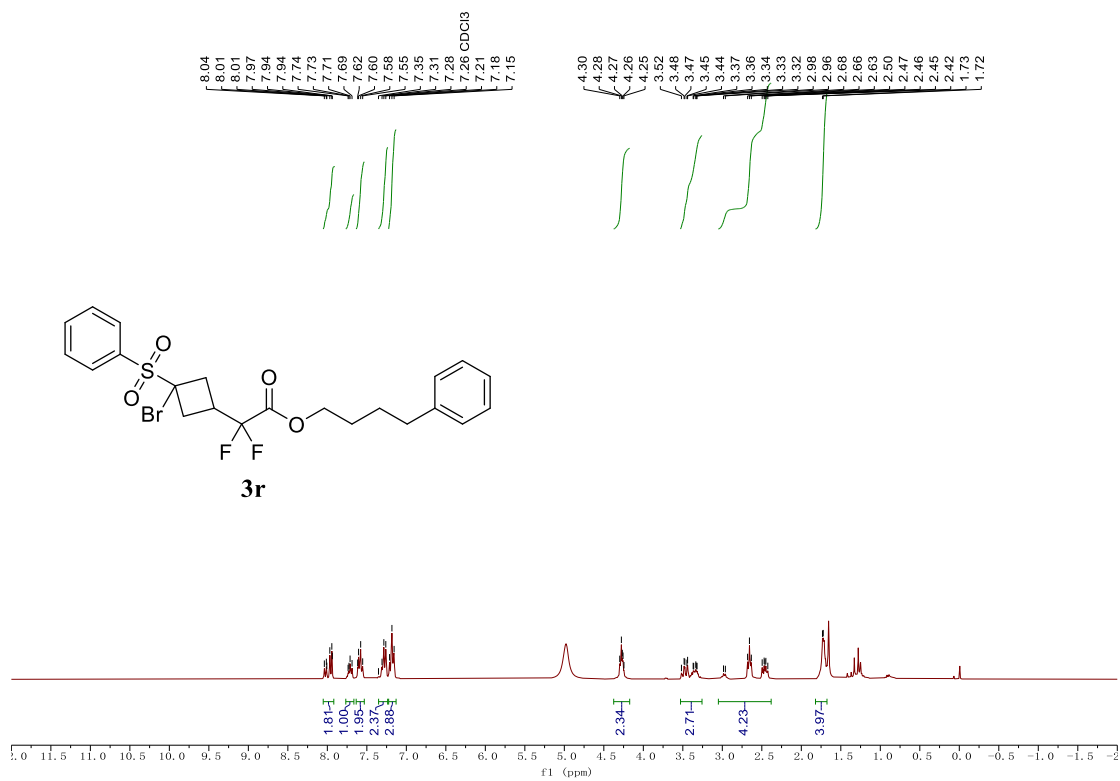

### <sup>13</sup>C NMR Spectrum of Compound **3r** (75 MHz, CDCl<sub>3</sub>)

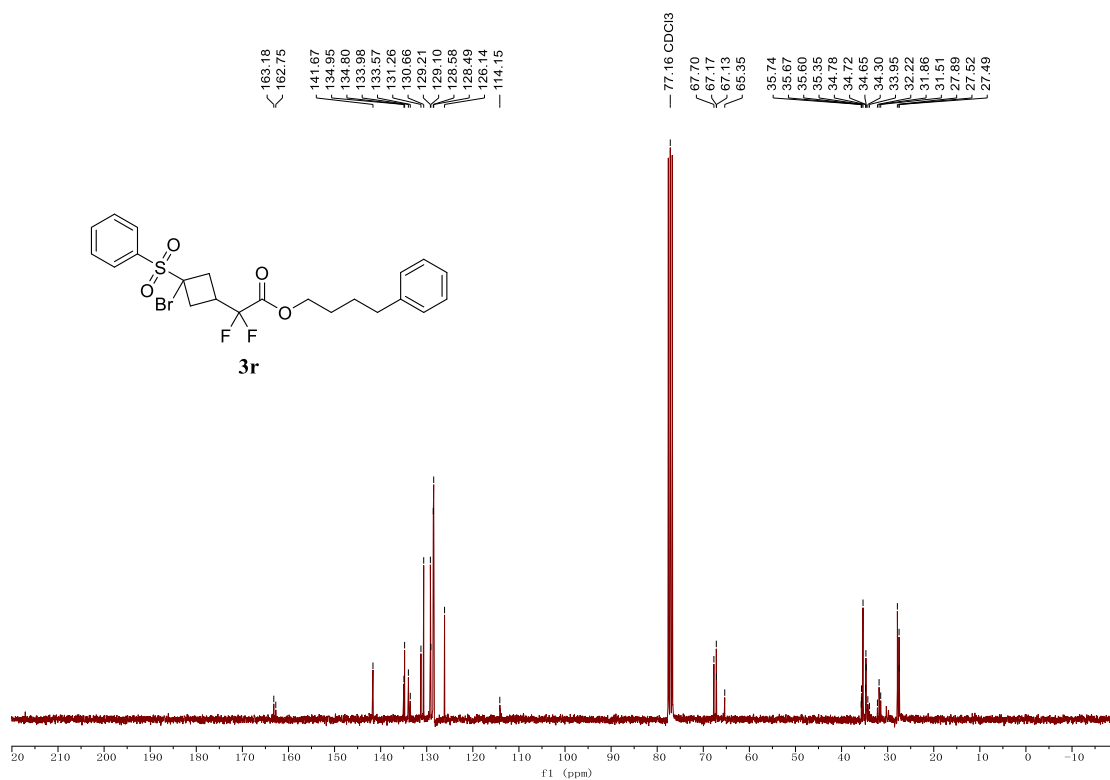

### <sup>19</sup>F NMR Spectrum of Compound **3r** (282 MHz, CDCl<sub>3</sub>)

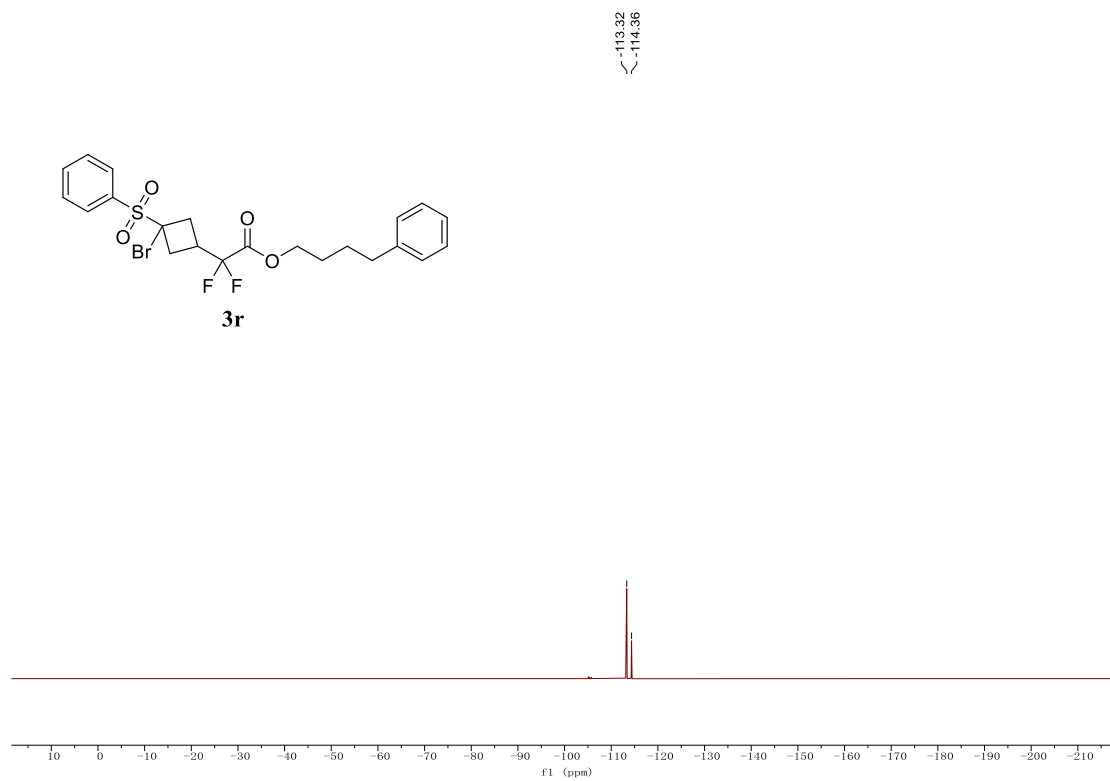

# $^1\text{H}$ NMR Spectrum of Compound **3s** (300 MHz, $\text{CDCl}_3$ )

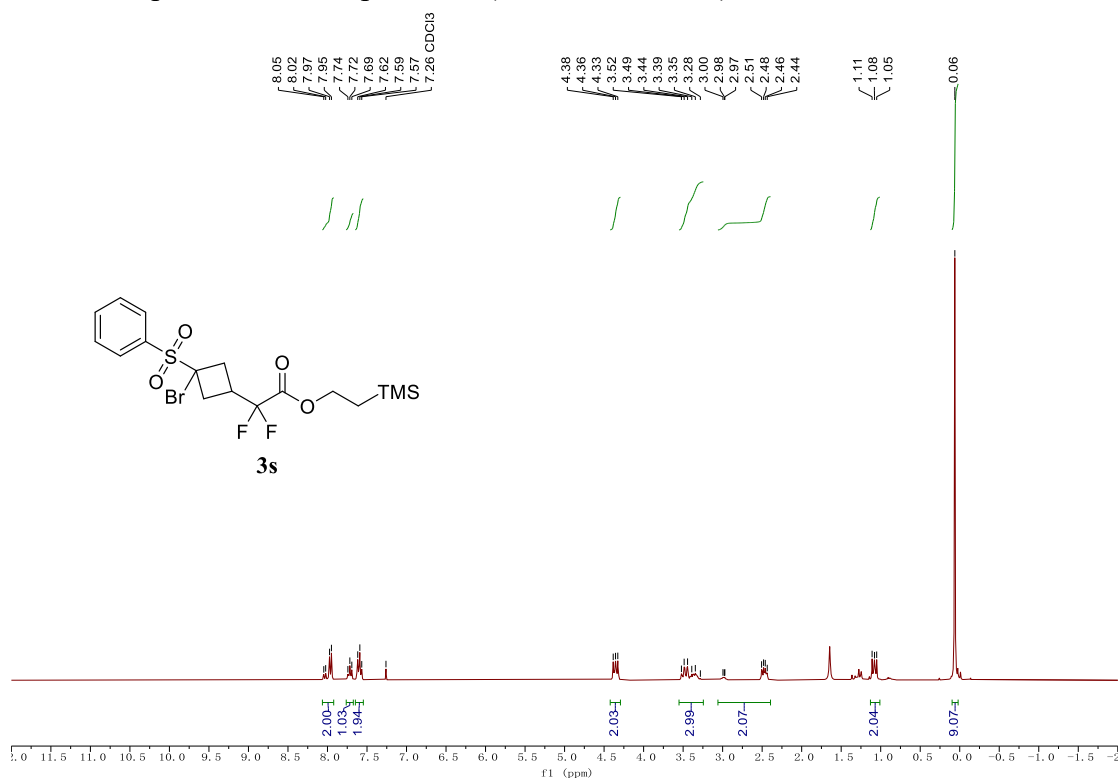

# $^{13}\text{C}$ NMR Spectrum of Compound **3s** (75 MHz, $\text{CDCl}_3$ )

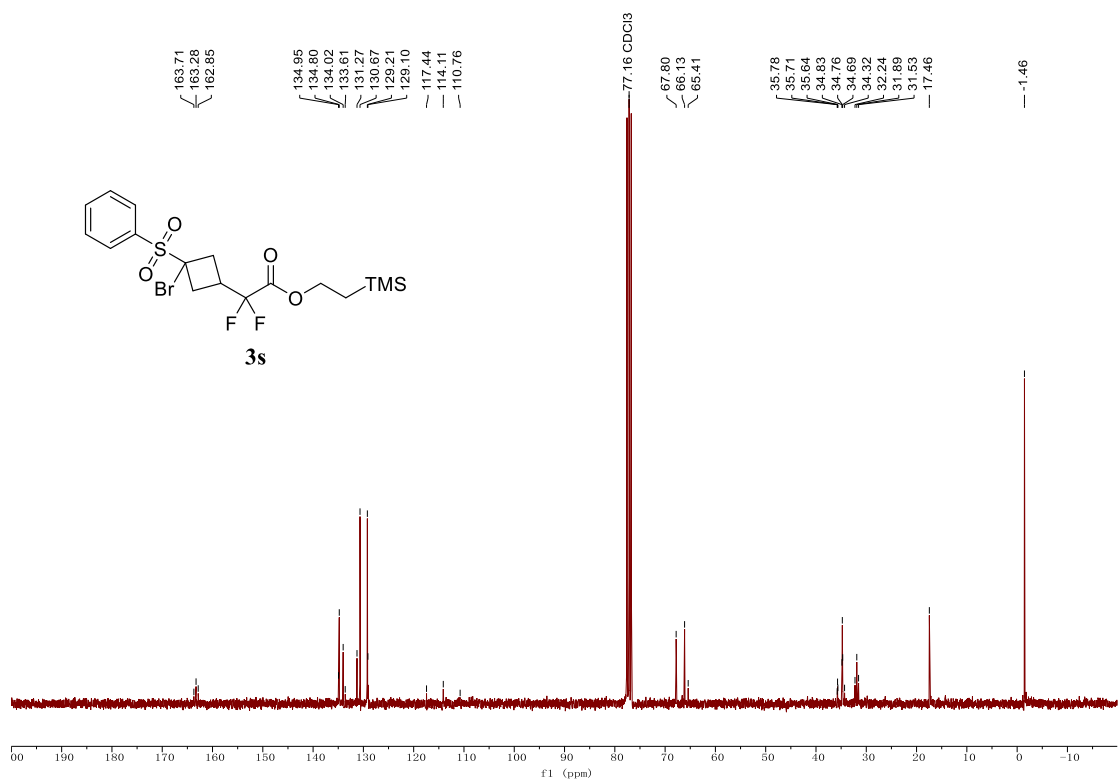

<sup>19</sup>F NMR Spectrum of Compound **3s** (282 MHz, CDCl<sub>3</sub>)

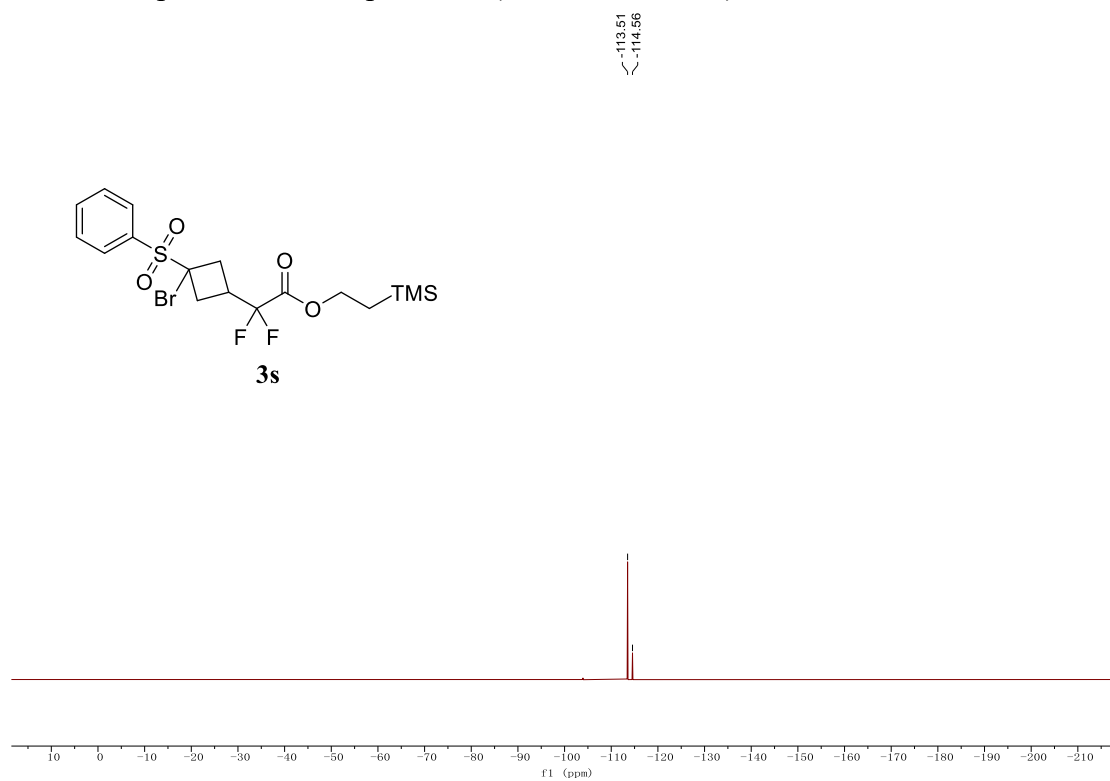

<sup>1</sup>H NMR Spectrum of Compound **3t** (300 MHz, CDCl<sub>3</sub>)

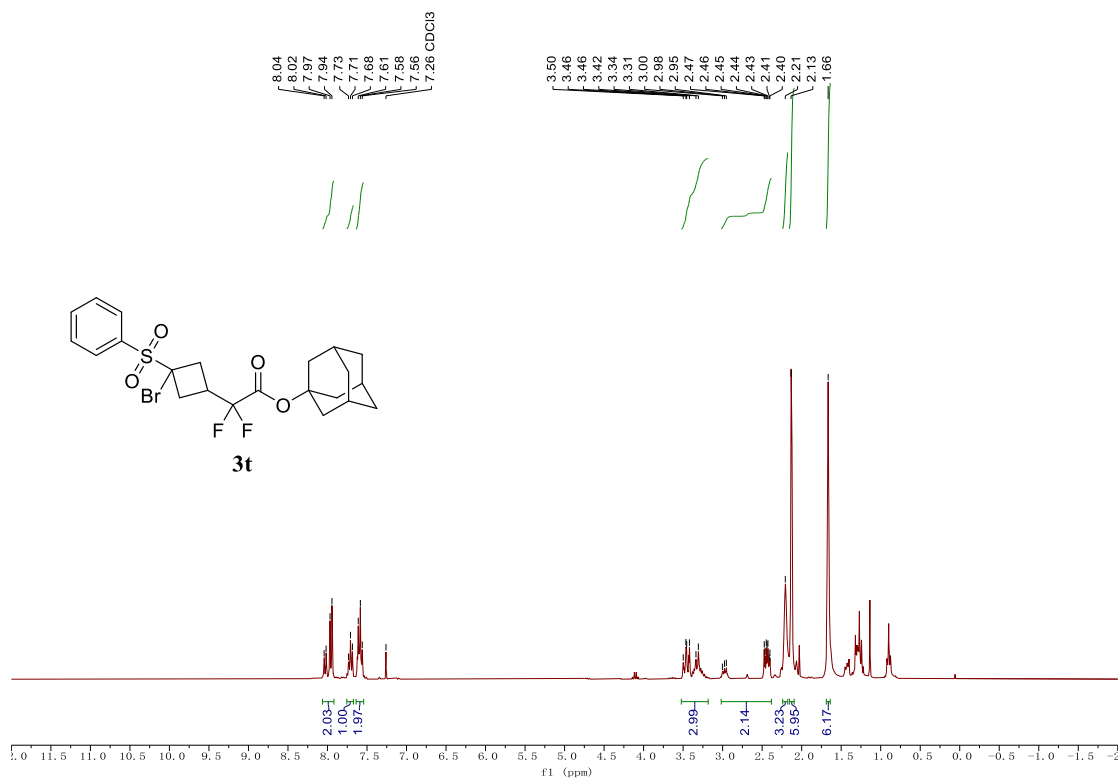

<sup>13</sup>C NMR Spectrum of Compound **3t** (75 MHz, CDCl<sub>3</sub>)

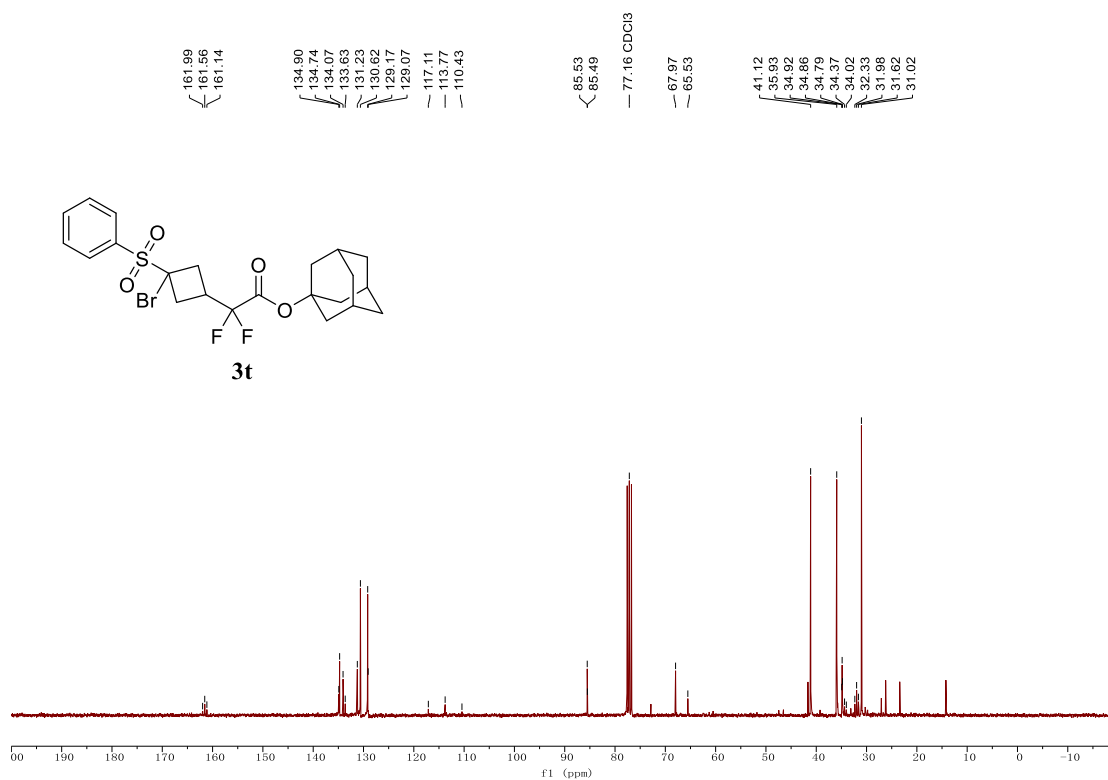

<sup>19</sup>F NMR Spectrum of Compound **3t** (282 MHz, CDCl<sub>3</sub>)

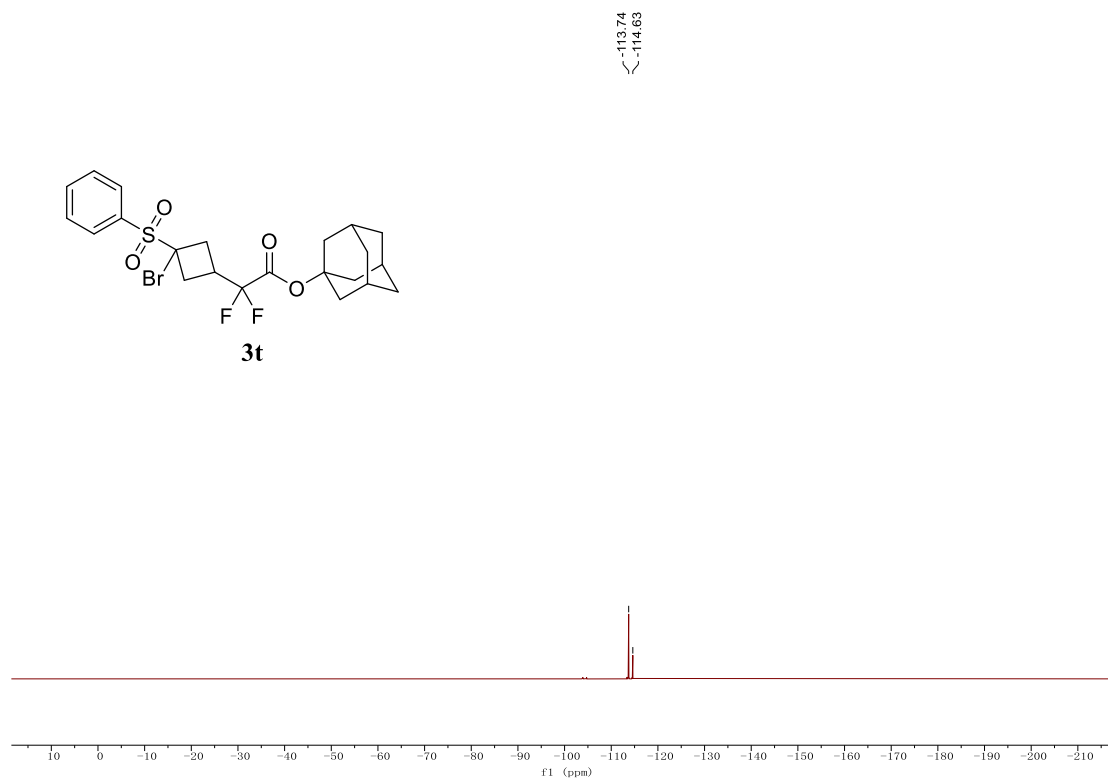

### $^1\text{H}$ NMR Spectrum of Compound **3u** (300 MHz, $\text{CDCl}_3$ )

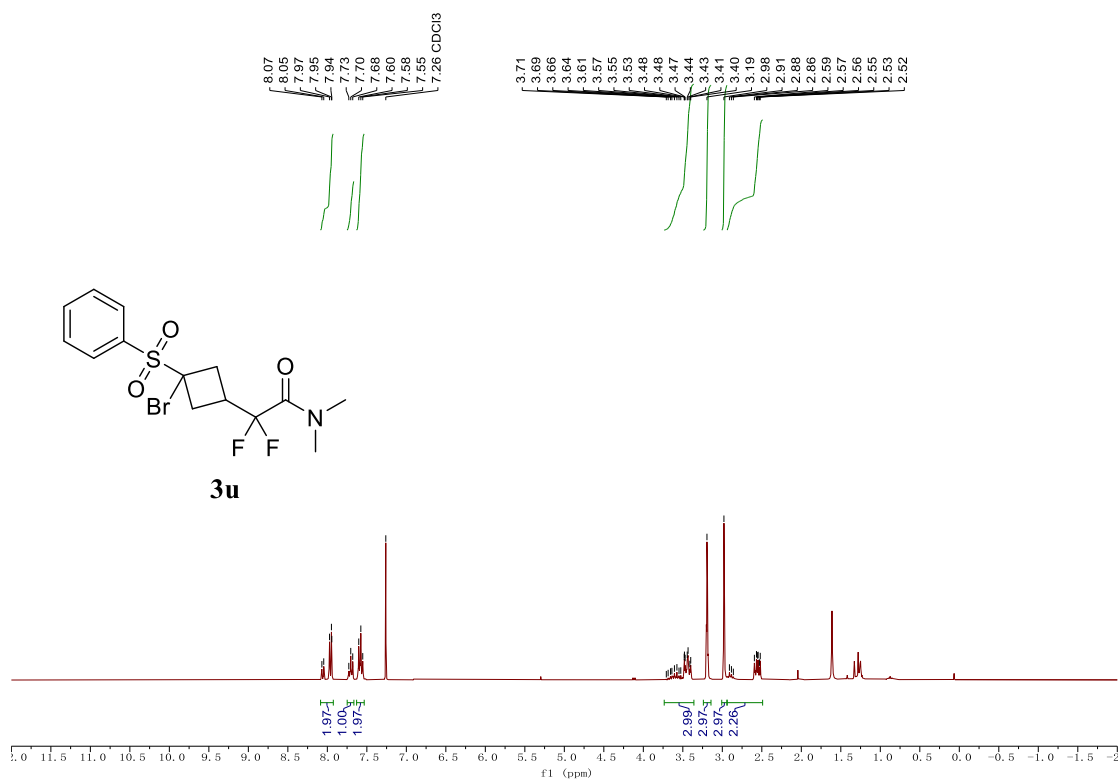

### $^{13}\text{C}$ NMR Spectrum of Compound **3u** (75 MHz, $\text{CDCl}_3$ )

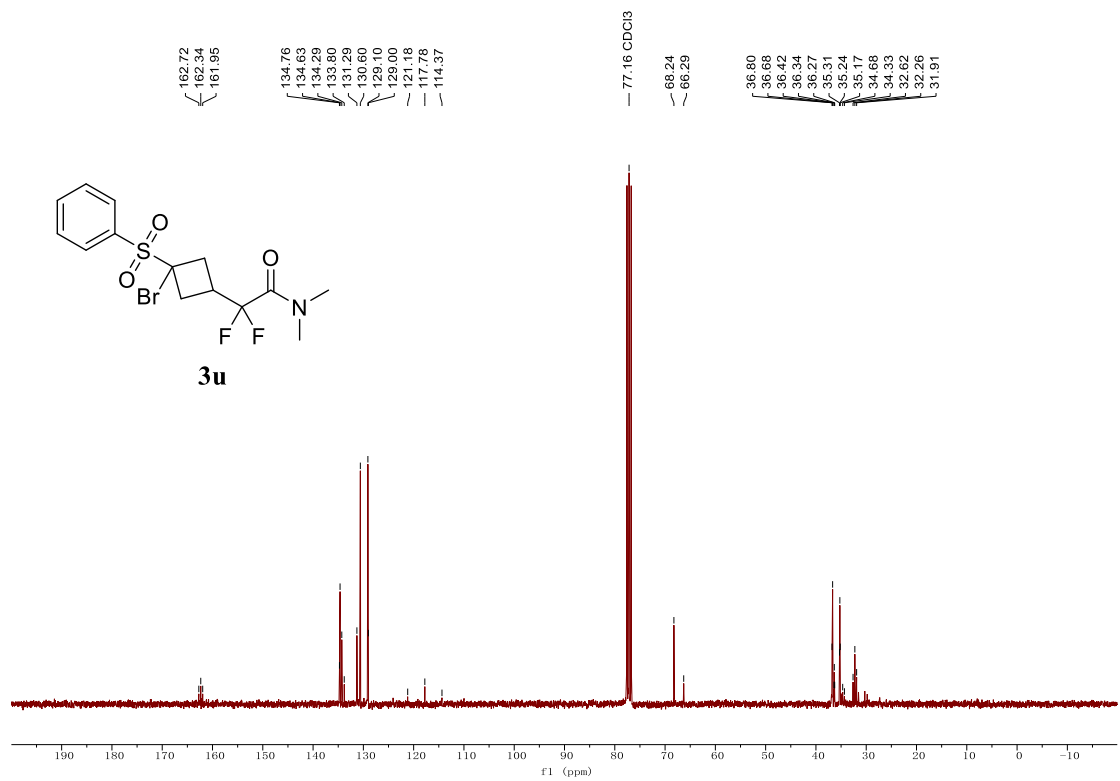

<sup>19</sup>F NMR Spectrum of Compound **3u** (282 MHz, CDCl<sub>3</sub>)

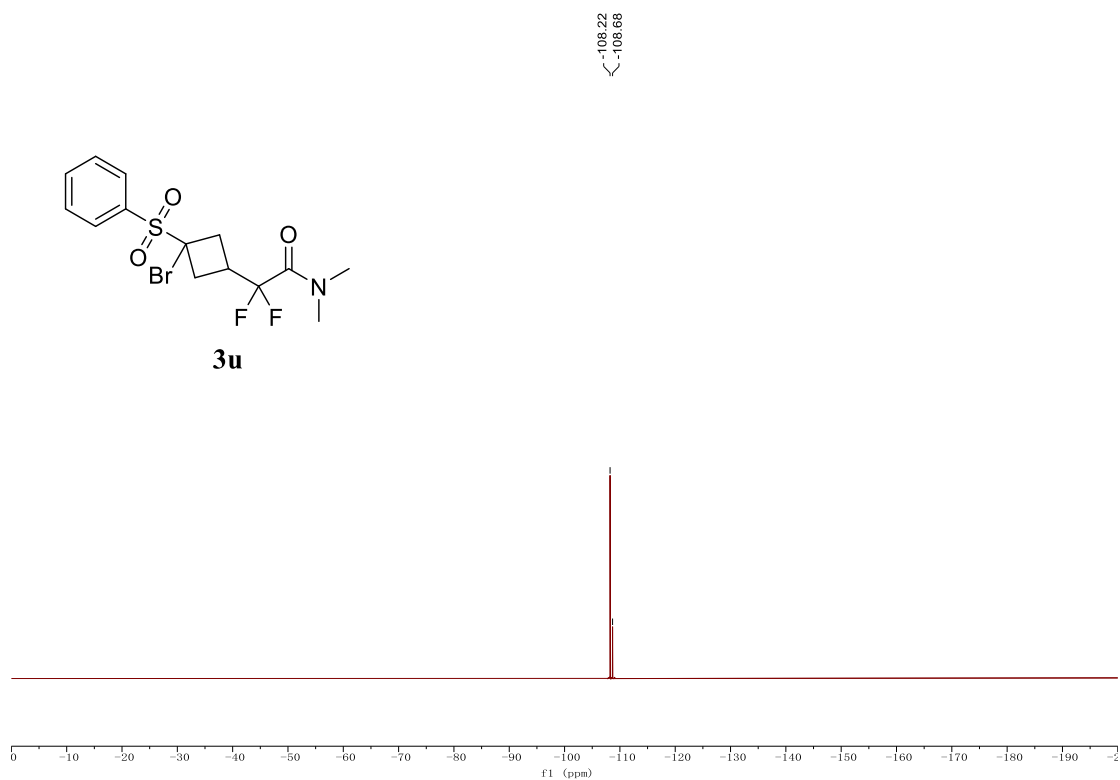

<sup>1</sup>H NMR Spectrum of Compound **3v** (300 MHz, CDCl<sub>3</sub>)

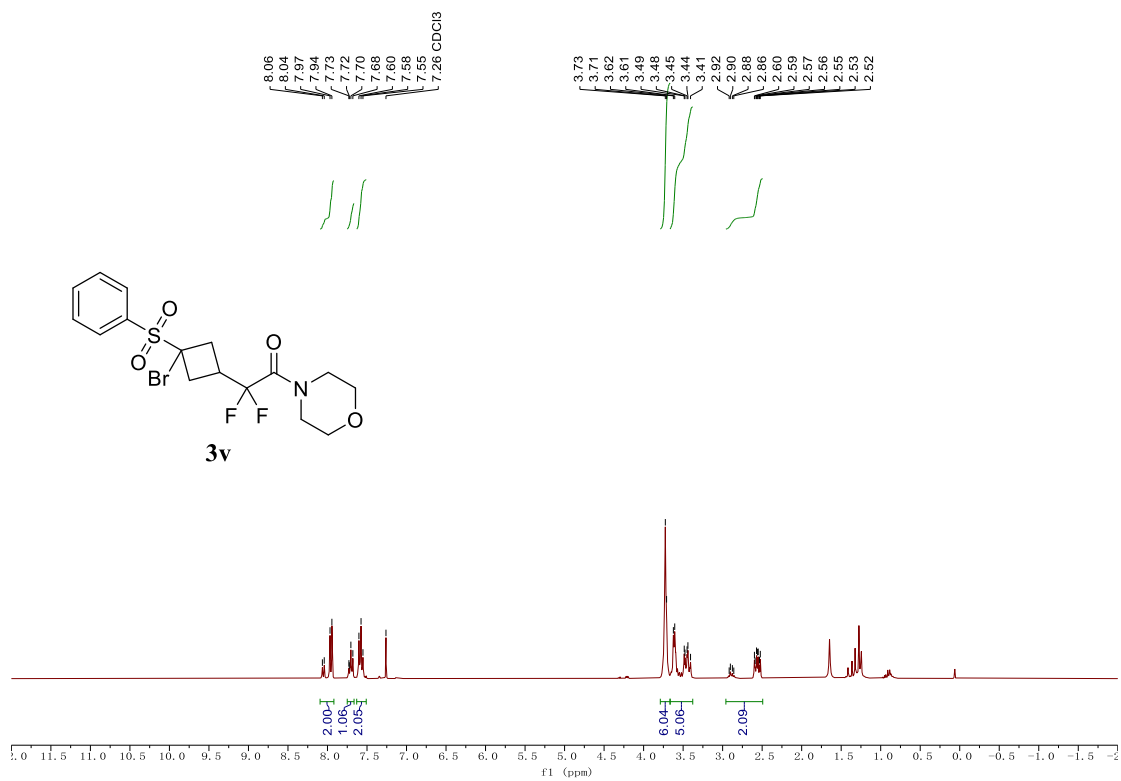

### $^{13}\text{C}$ NMR Spectrum of Compound **3v** (101 MHz, $\text{CDCl}_3$ )

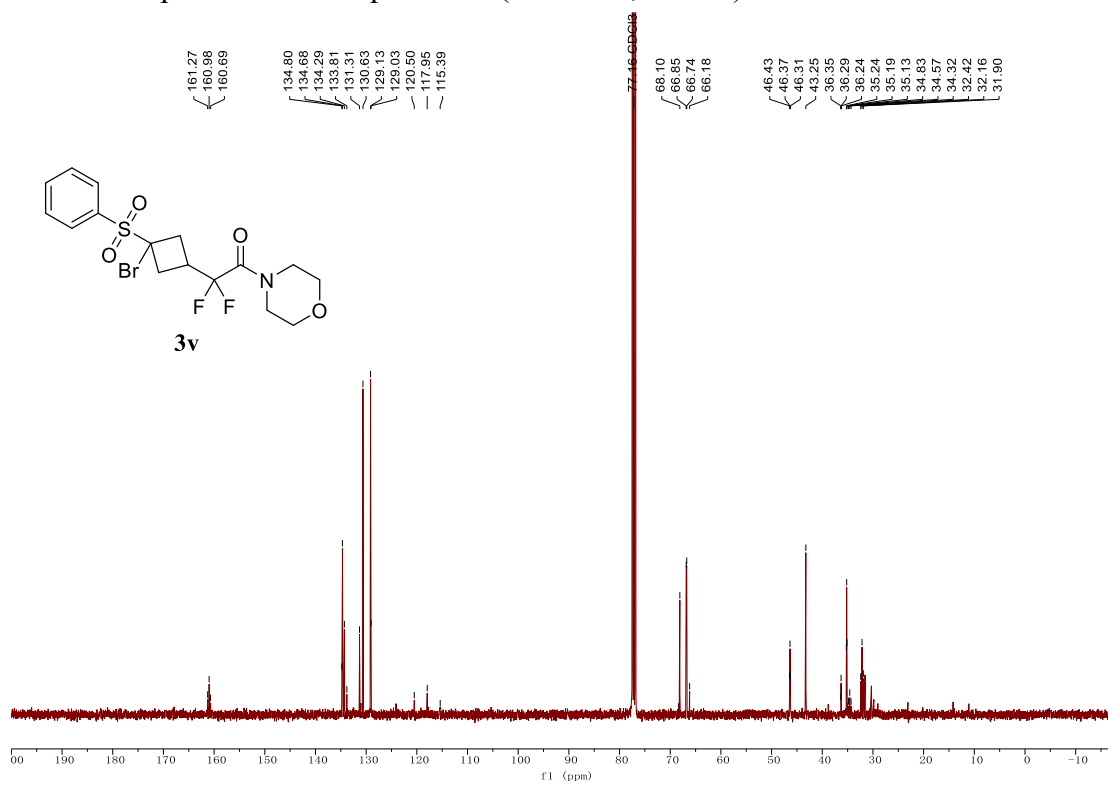

### $^{19}\text{F}$ NMR Spectrum of Compound **3v** (282 MHz, $\text{CDCl}_3$ )

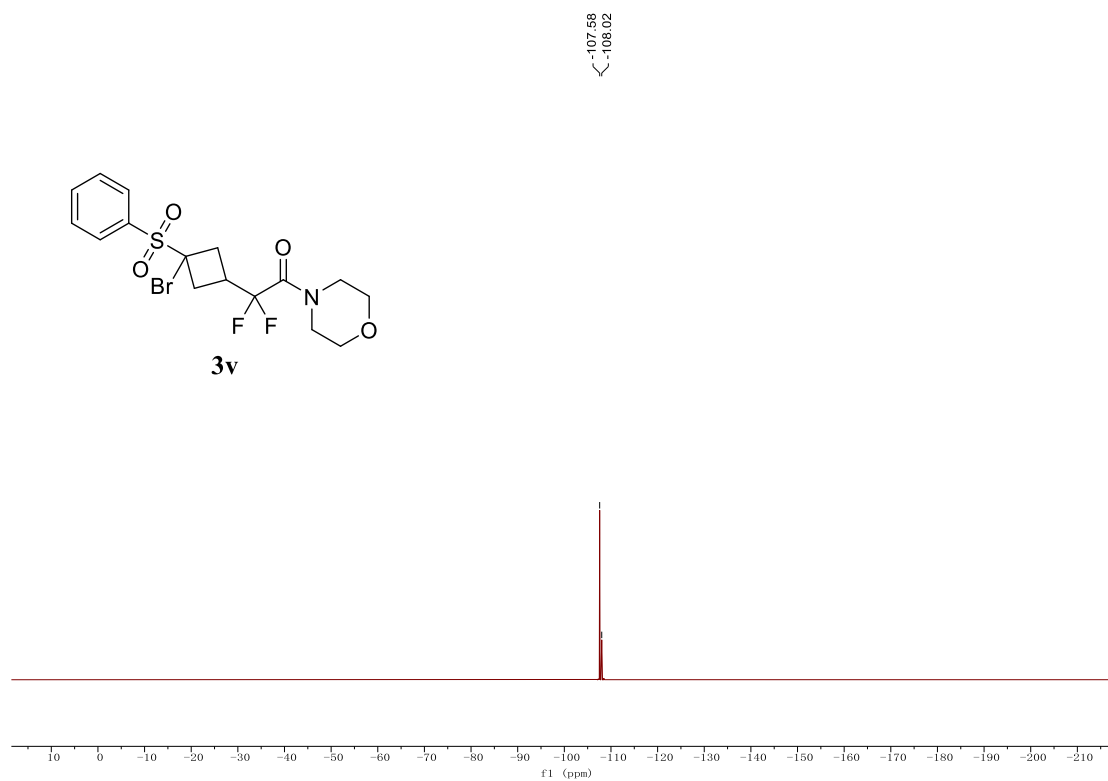



<sup>1</sup>H NMR Spectrum of Compound **3w** (300 MHz, CDCl<sub>3</sub>)

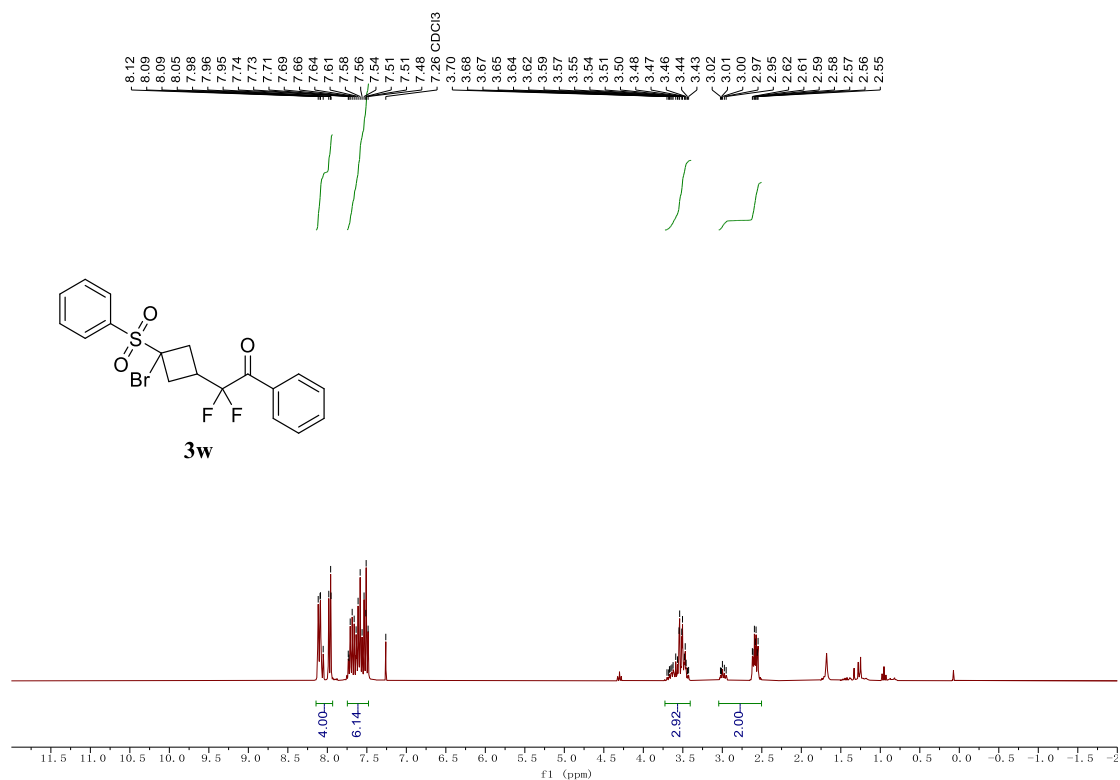

<sup>13</sup>C NMR Spectrum of Compound **3w** (75 MHz, CDCl<sub>3</sub>)

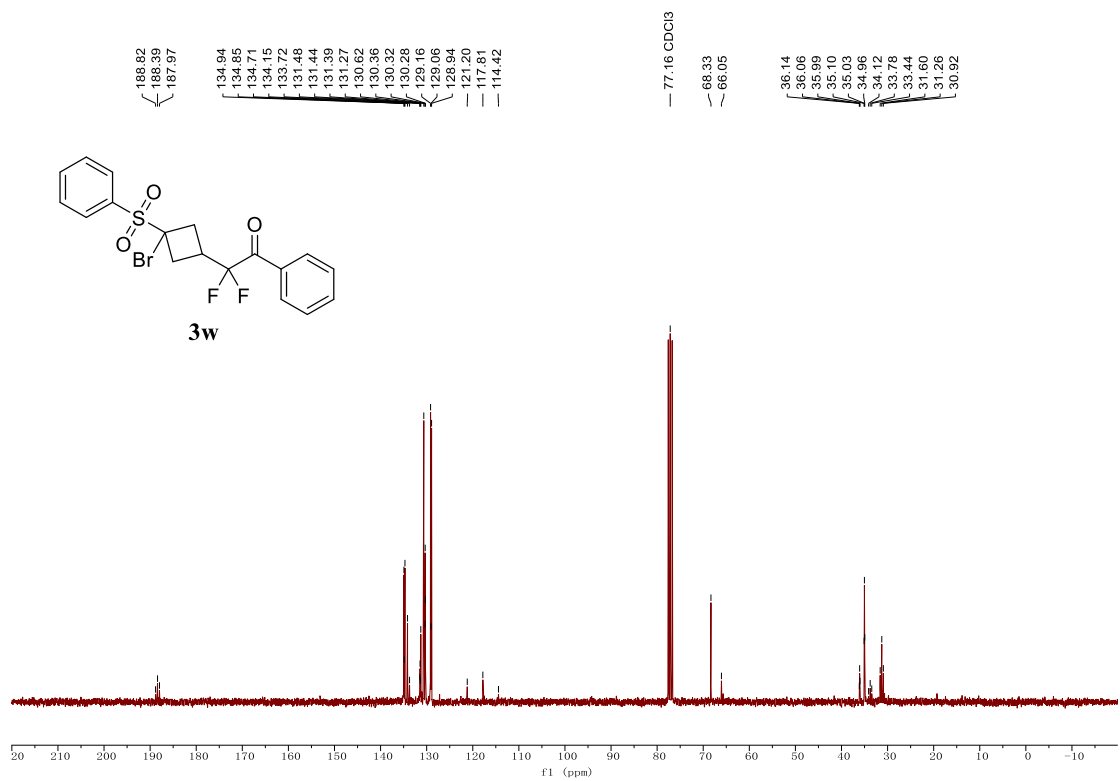

<sup>19</sup>F NMR Spectrum of Compound **3w** (282 MHz, CDCl<sub>3</sub>)

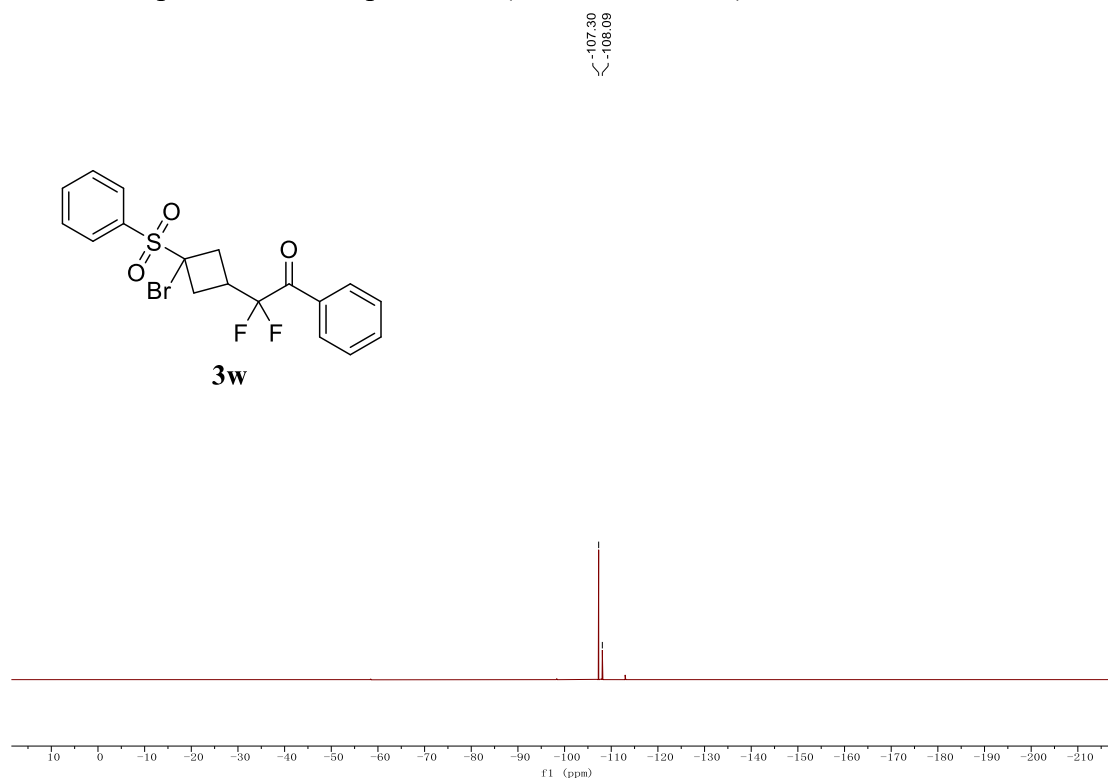

<sup>1</sup>H NMR Spectrum of Compound **4a** (isomer 1) (400 MHz, CDCl<sub>3</sub>)

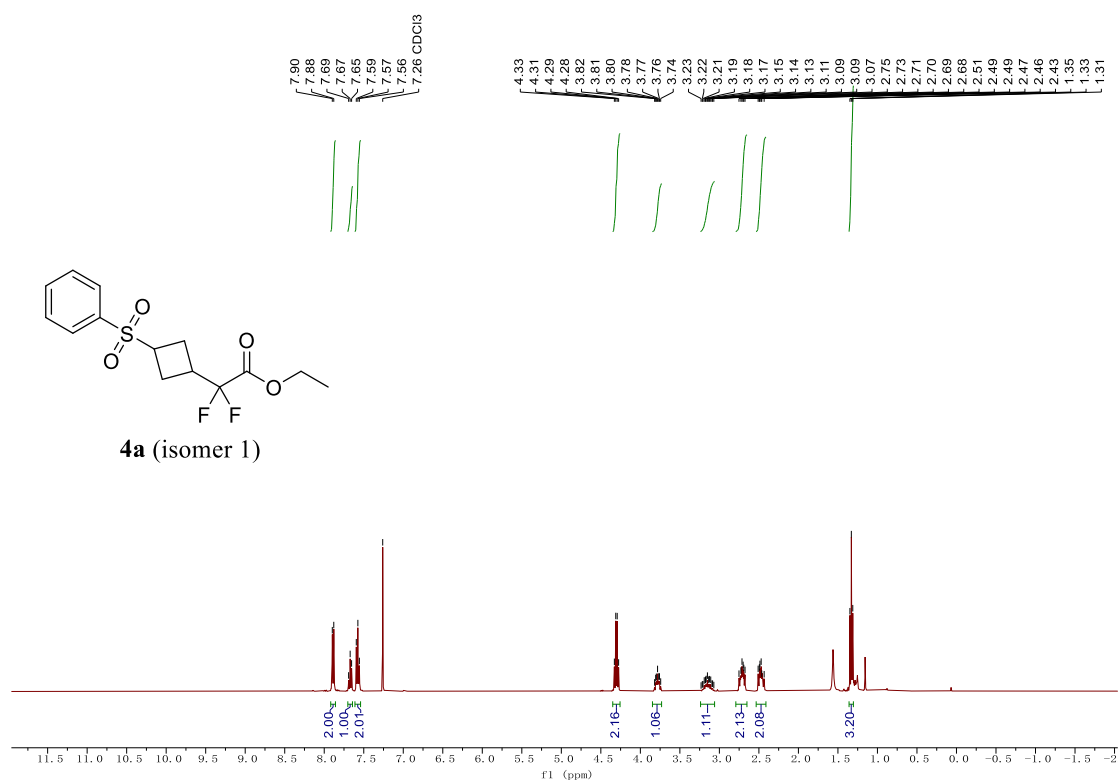

<sup>13</sup>C NMR Spectrum of Compound **4a** (isomer 1) (75 MHz, CDCl<sub>3</sub>)

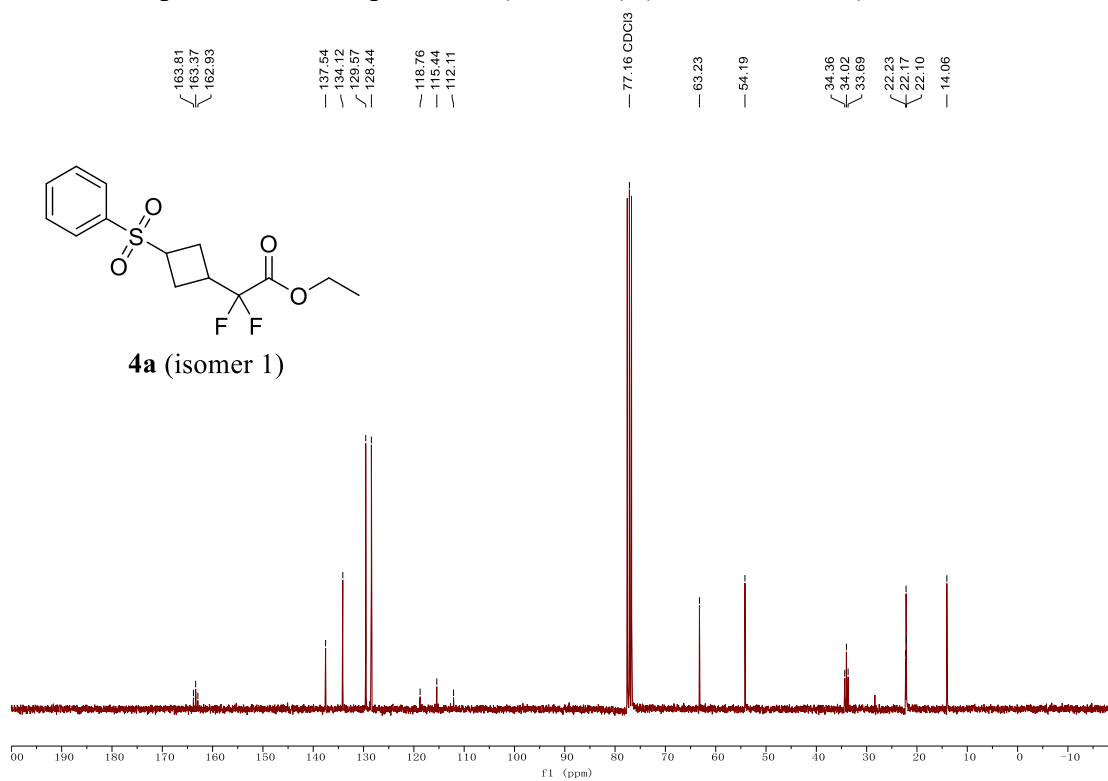

<sup>19</sup>F NMR Spectrum of Compound **4a** (isomer 1) (282 MHz, CDCl<sub>3</sub>)

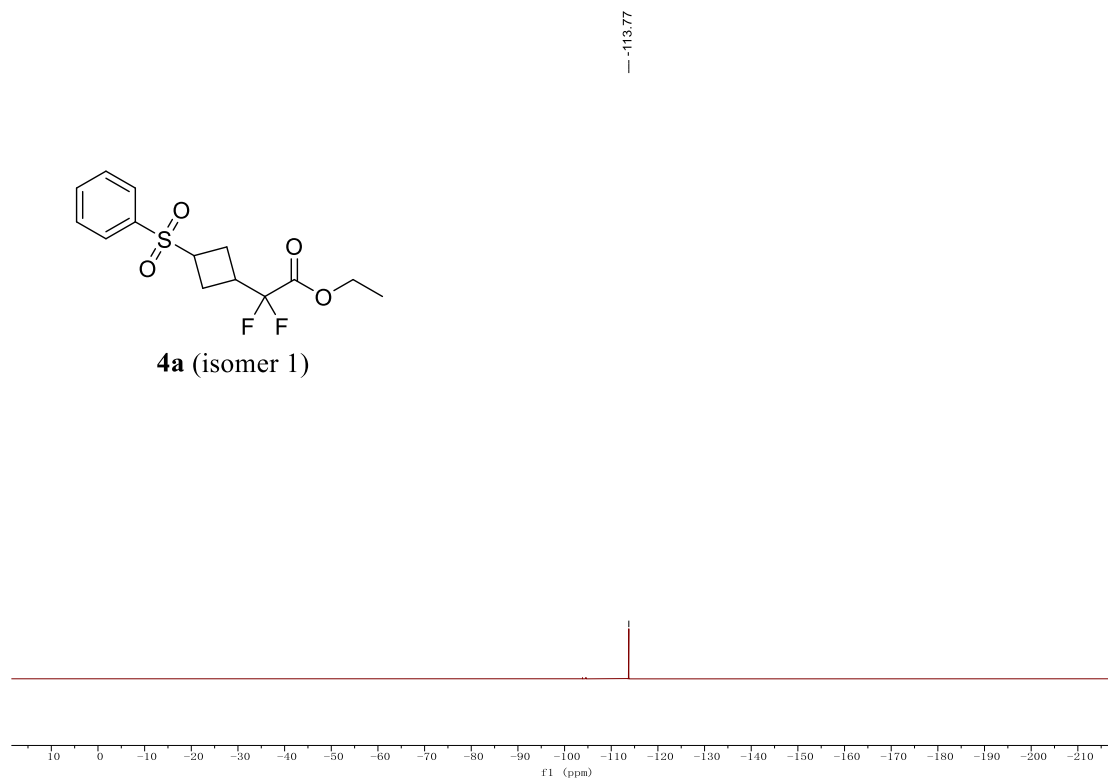

<sup>1</sup>H NMR Spectrum of Compound **4a** (isomer 2) (400 MHz, CDCl<sub>3</sub>)

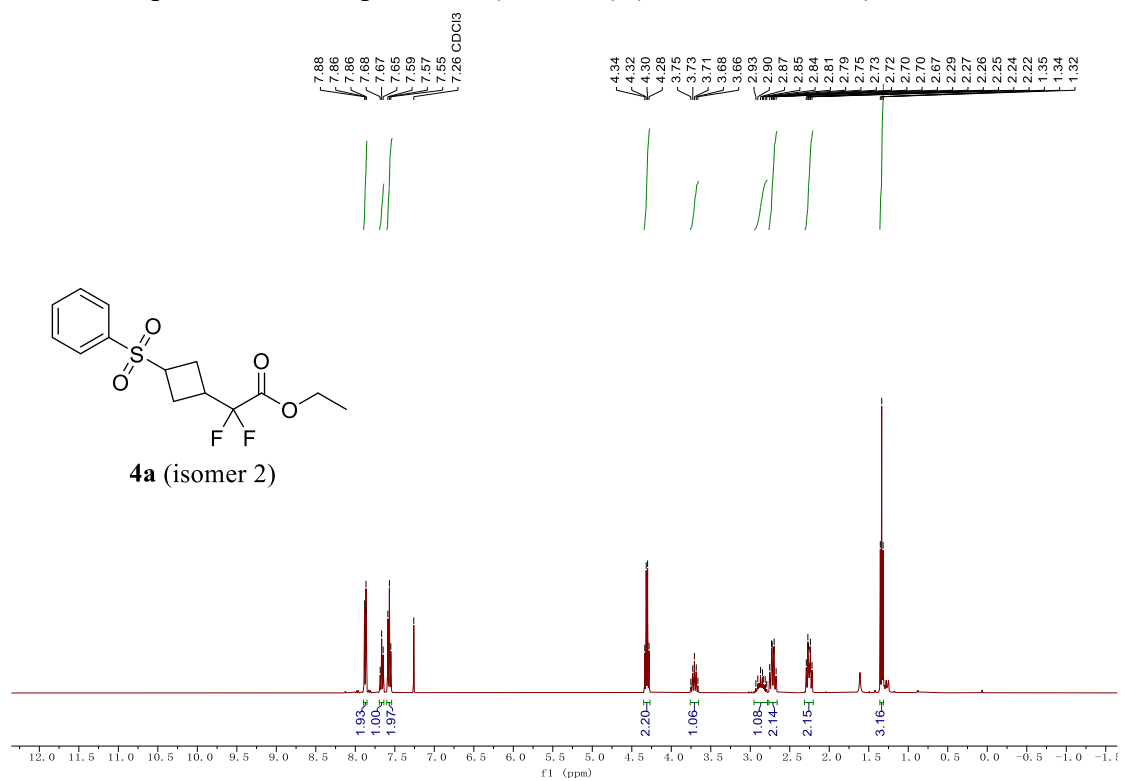

<sup>13</sup>C NMR Spectrum of Compound **4a** (isomer 2) (75 MHz, CDCl<sub>3</sub>)

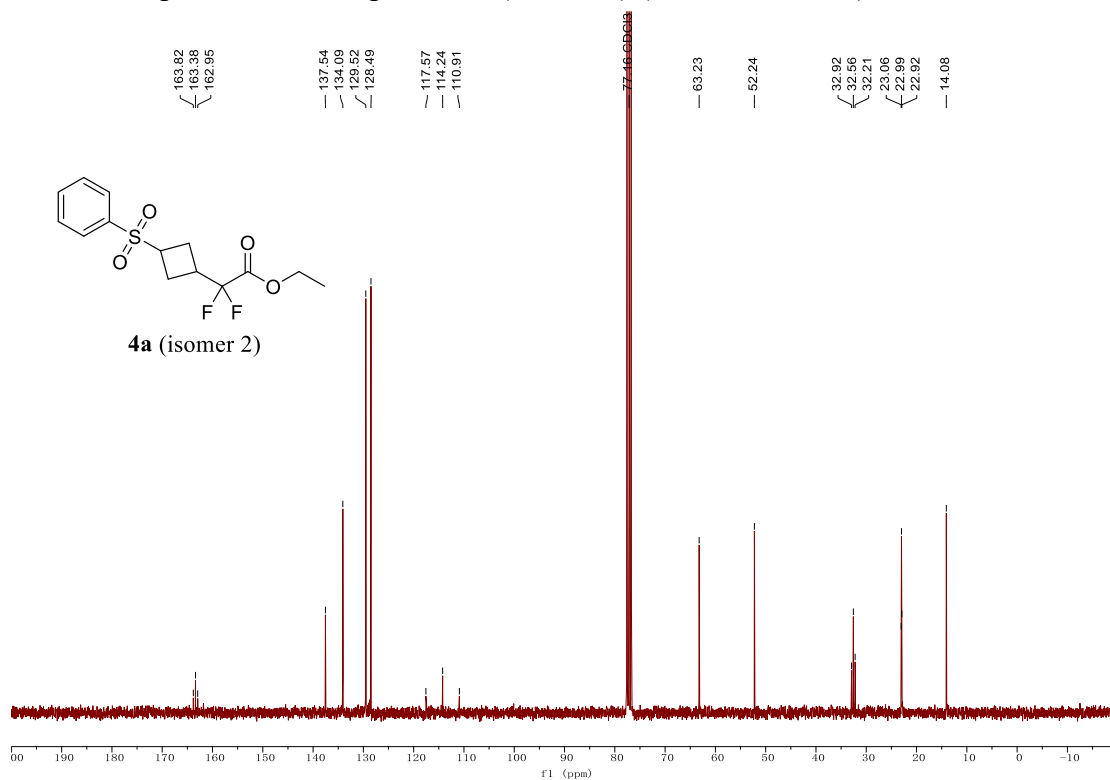

<sup>19</sup>F NMR Spectrum of Compound **4a** (isomer 2) (282 MHz, CDCl<sub>3</sub>)

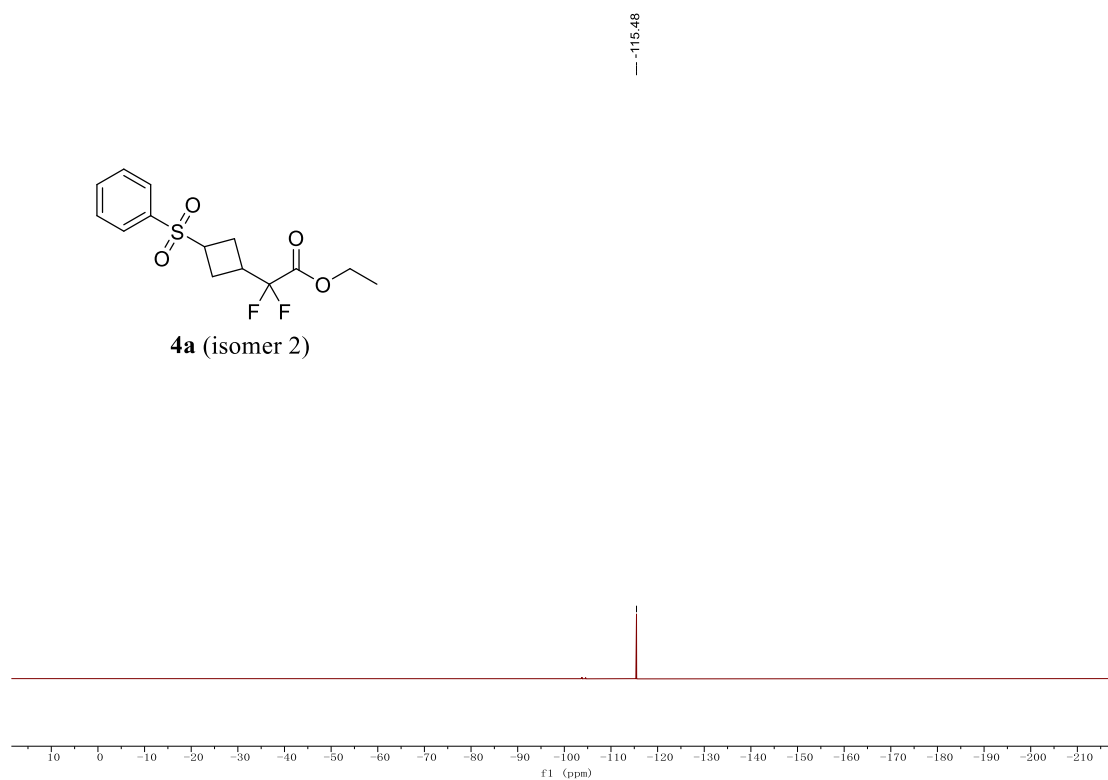

<sup>1</sup>H NMR Spectrum of Compound **4b** (300 MHz, CDCl<sub>3</sub>)

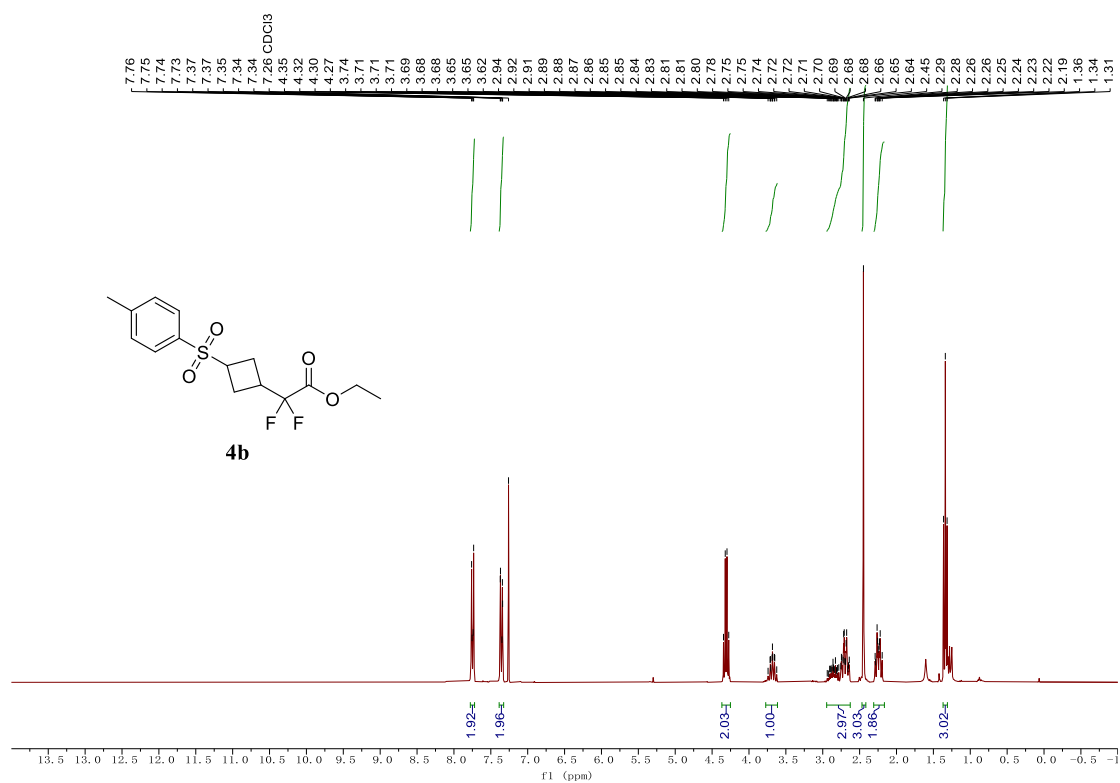

### $^{13}\text{C}$ NMR Spectrum of Compound **4b** (101 MHz, $\text{CDCl}_3$ )

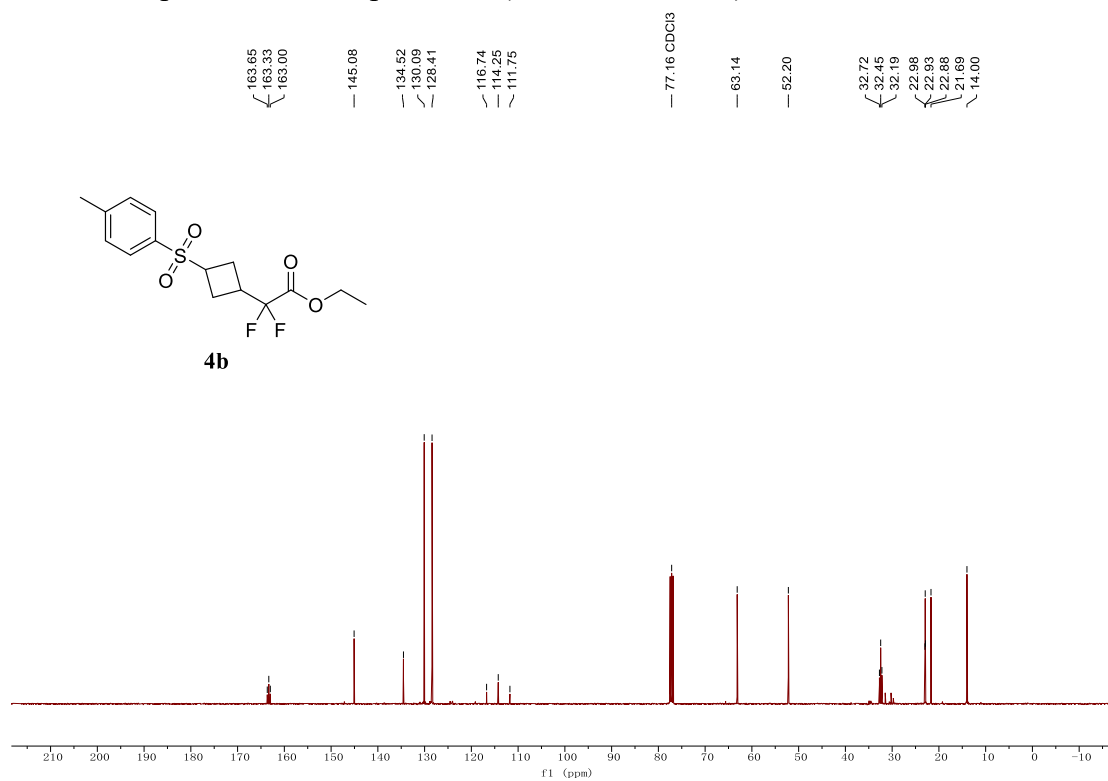

### $^{19}\text{F}$ NMR Spectrum of Compound **4b** (282 MHz, $\text{CDCl}_3$ )

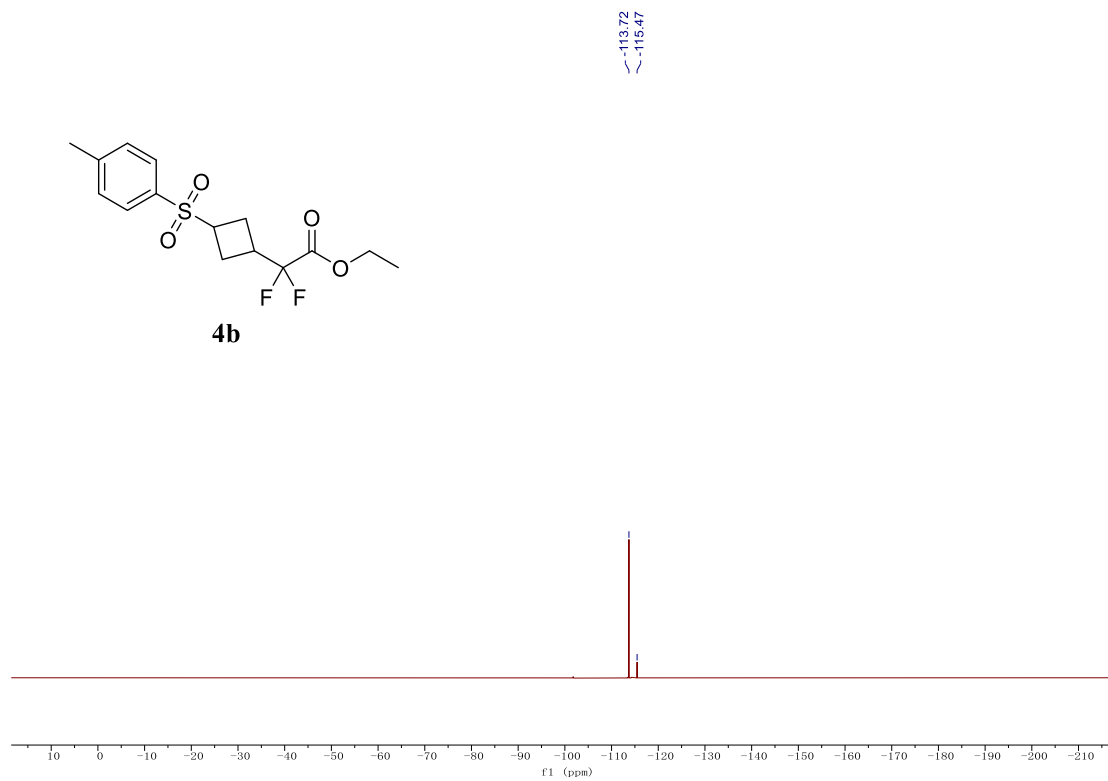

# <sup>1</sup>H NMR Spectrum of Compound 4c (300 MHz, CDCl<sub>3</sub>)

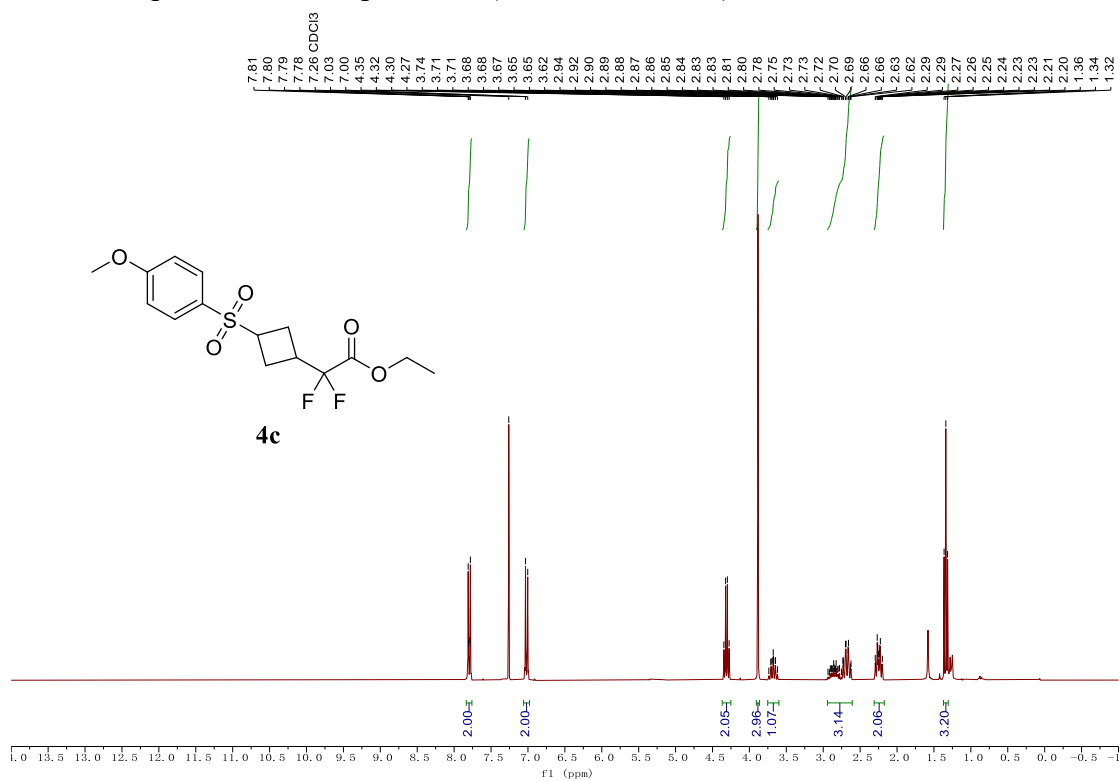

# <sup>13</sup>C NMR Spectrum of Compound 4c (101 MHz, CDCl<sub>3</sub>)

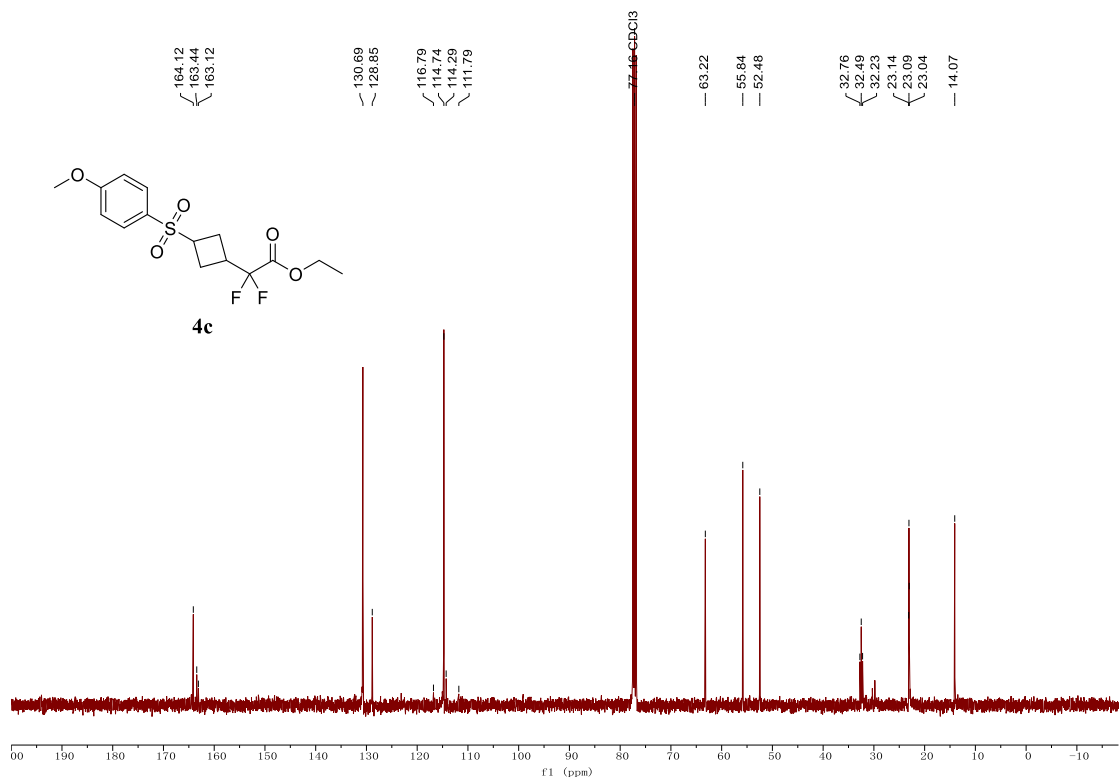

<sup>19</sup>F NMR Spectrum of Compound **4c** (282 MHz, CDCl<sub>3</sub>)

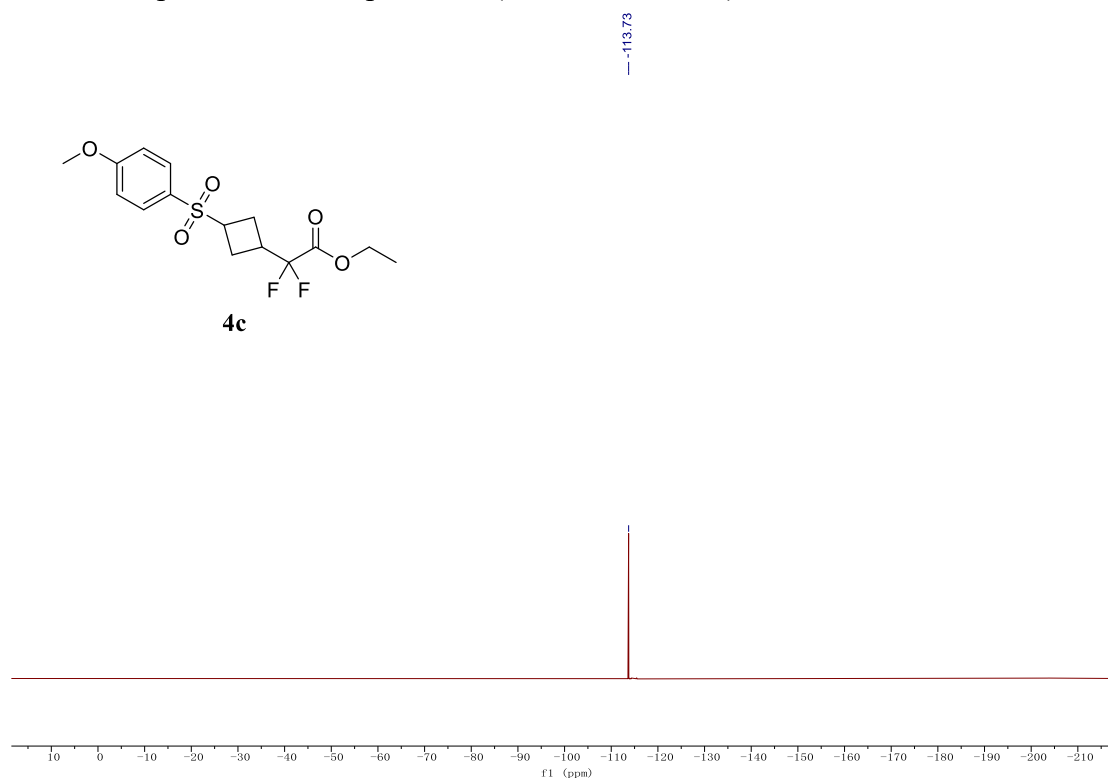

<sup>1</sup>H NMR Spectrum of Compound **4d** (300 MHz, CDCl<sub>3</sub>)

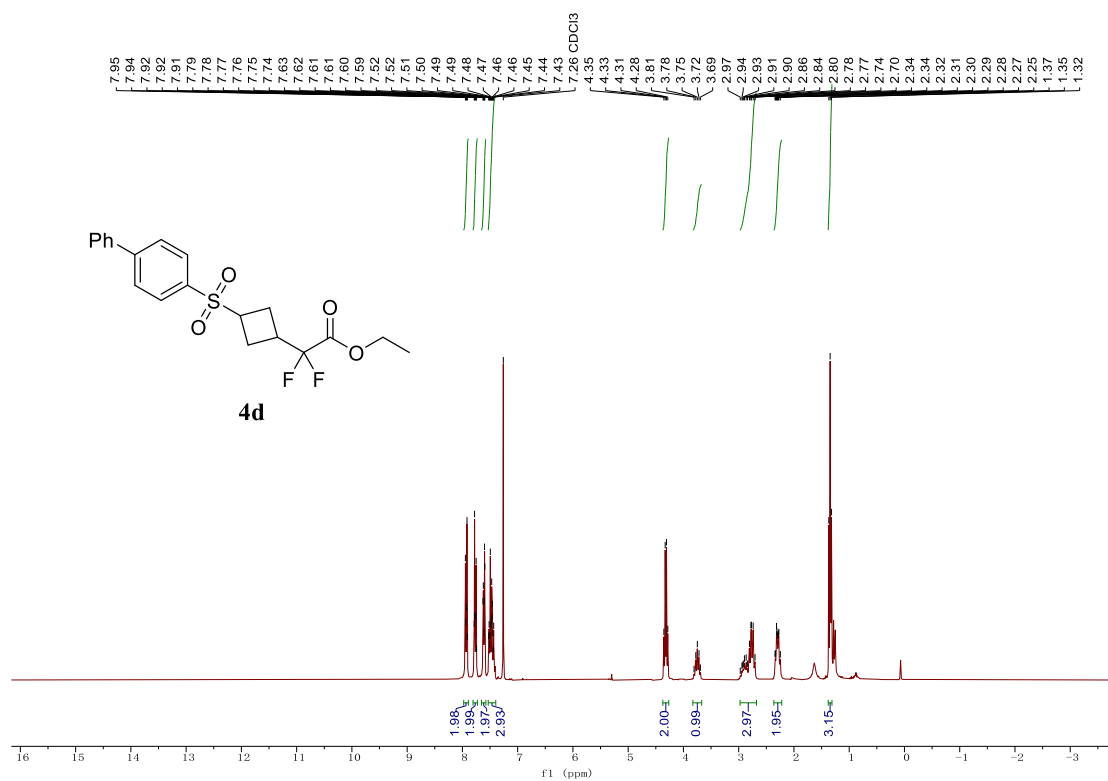



<sup>13</sup>C NMR Spectrum of Compound **4d** (101 MHz, CDCl<sub>3</sub>)

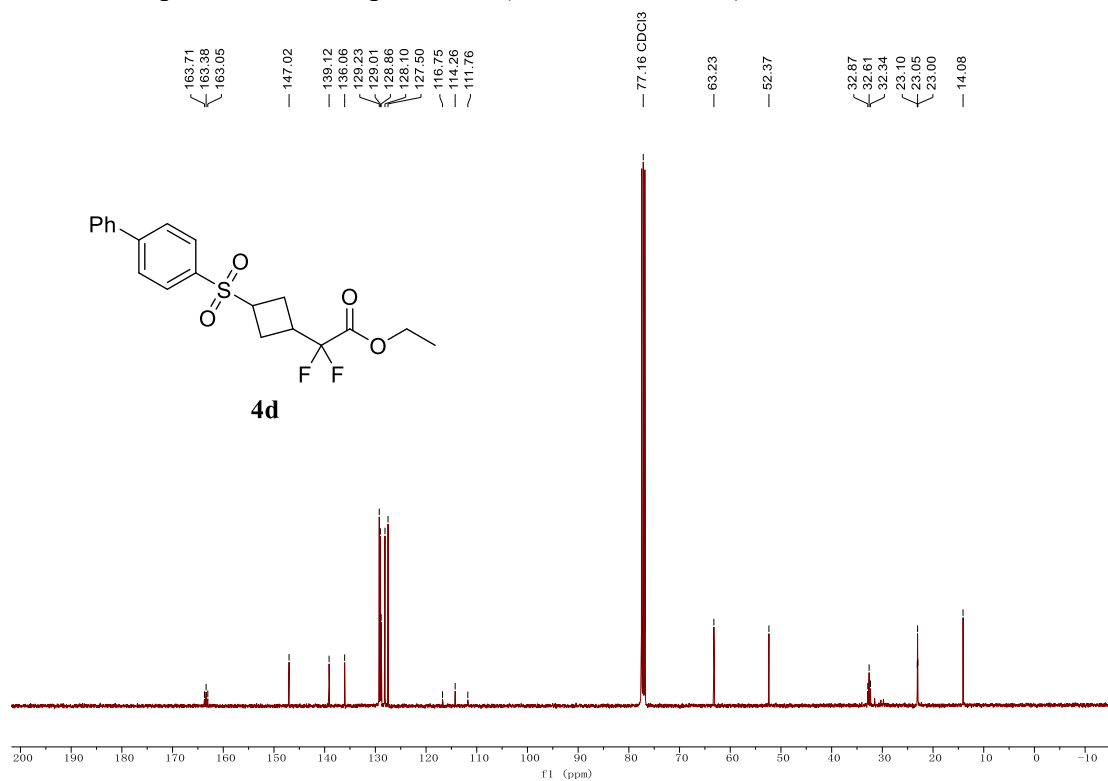

<sup>19</sup>F NMR Spectrum of Compound **4d** (282 MHz, CDCl<sub>3</sub>)

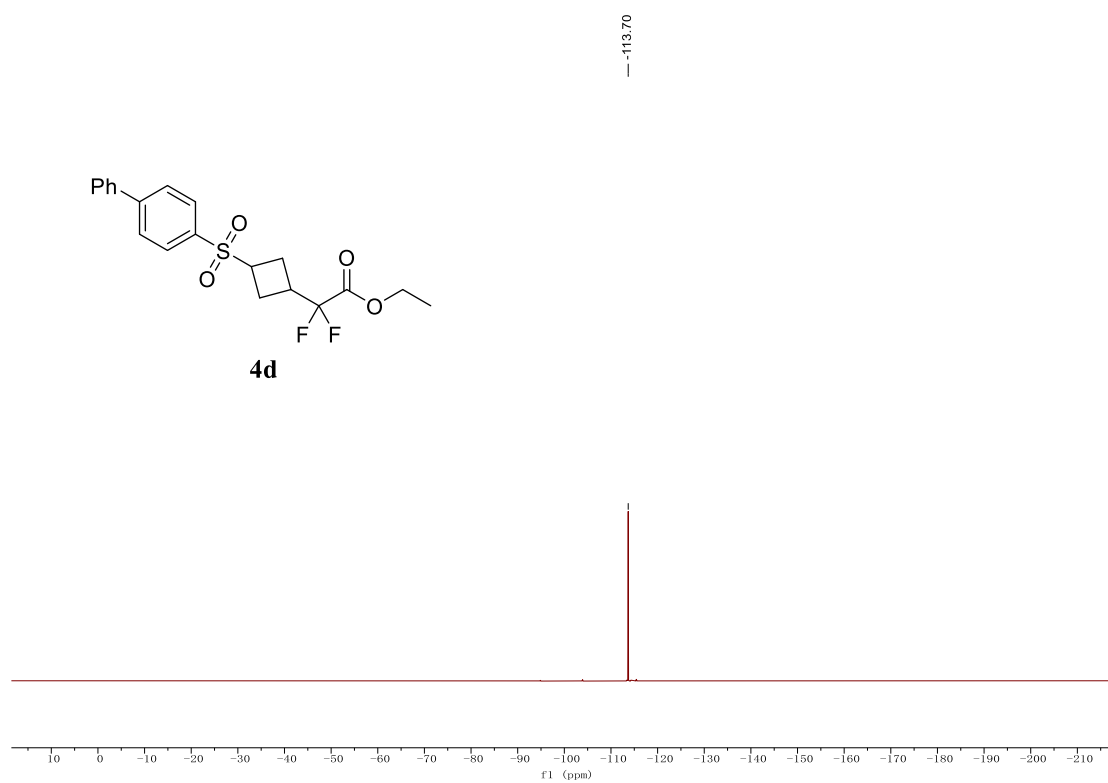

<sup>1</sup>H NMR Spectrum of Compound **4e** (300 MHz, CDCl<sub>3</sub>)

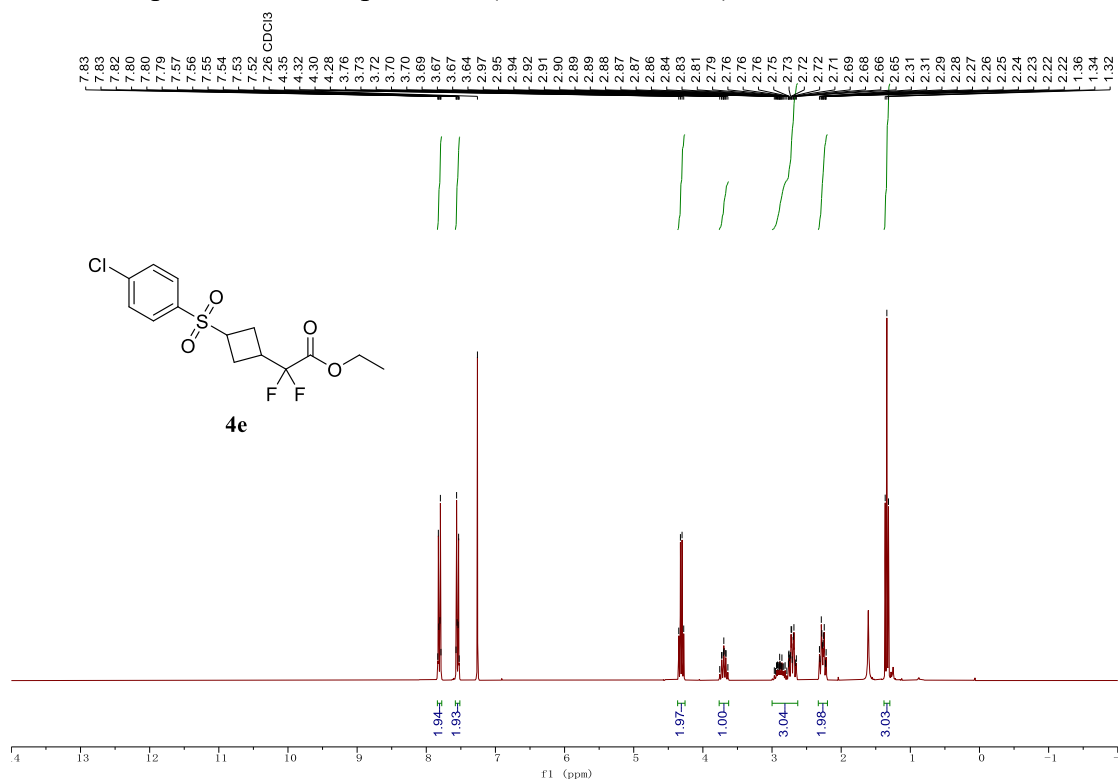

<sup>13</sup>C NMR Spectrum of Compound **4e** (75 MHz, CDCl<sub>3</sub>)

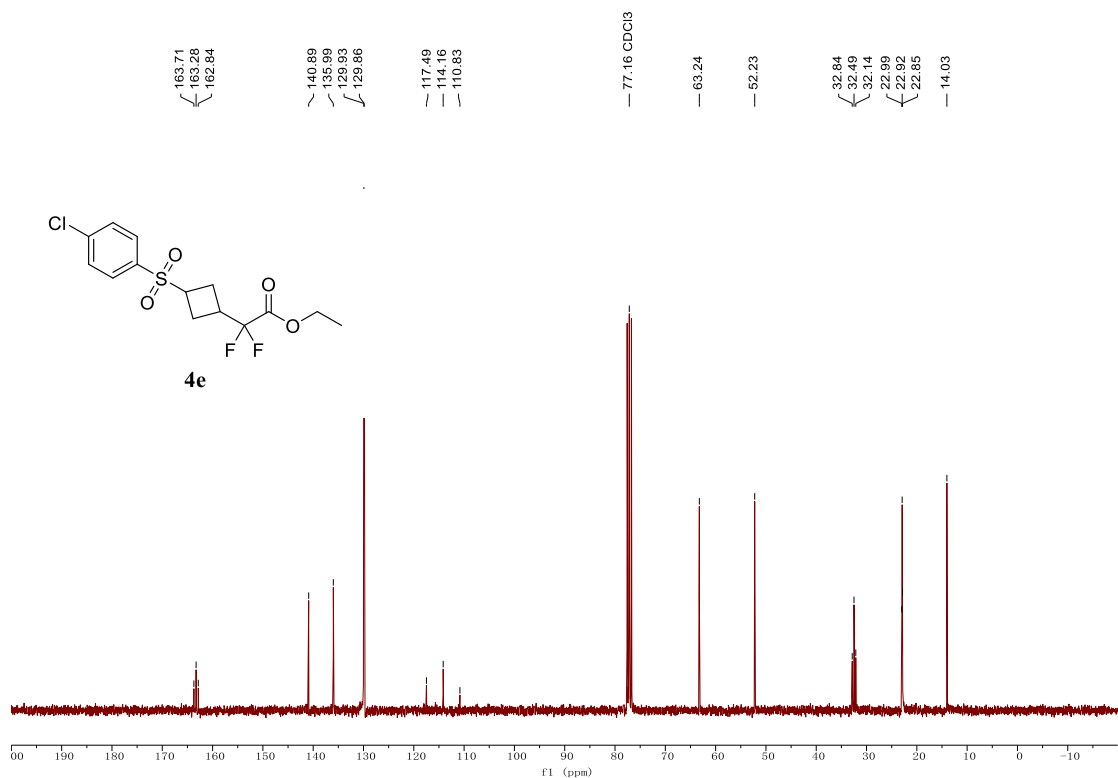

$^{19}\text{F}$  NMR Spectrum of Compound **4e** (282 MHz,  $\text{CDCl}_3$ )

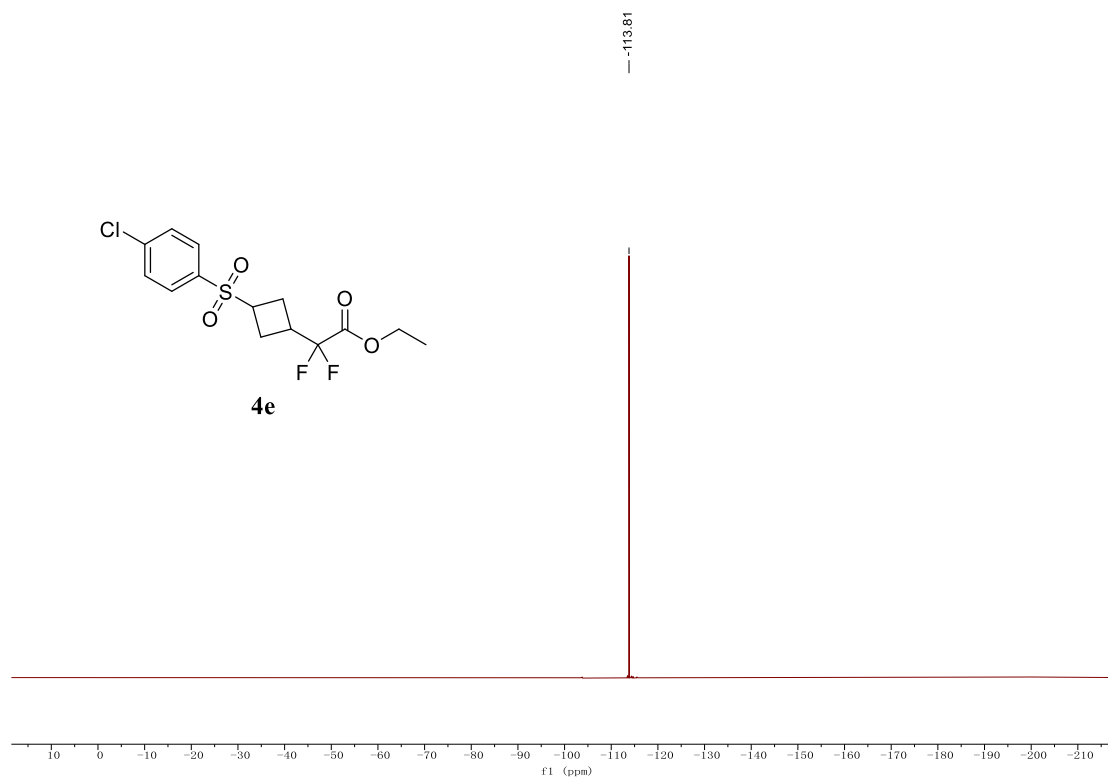

$^1\text{H}$  NMR Spectrum of Compound **4f** (300 MHz,  $\text{CDCl}_3$ )

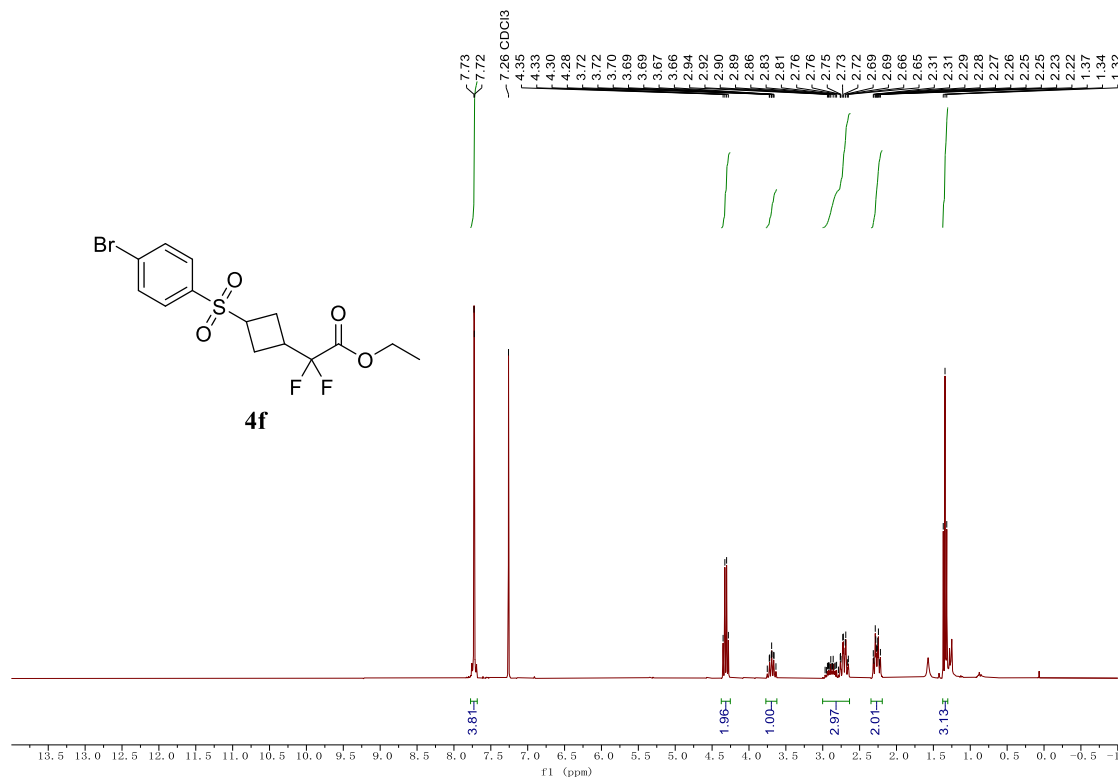

<sup>13</sup>C NMR Spectrum of Compound **4f** (75 MHz, CDCl<sub>3</sub>)

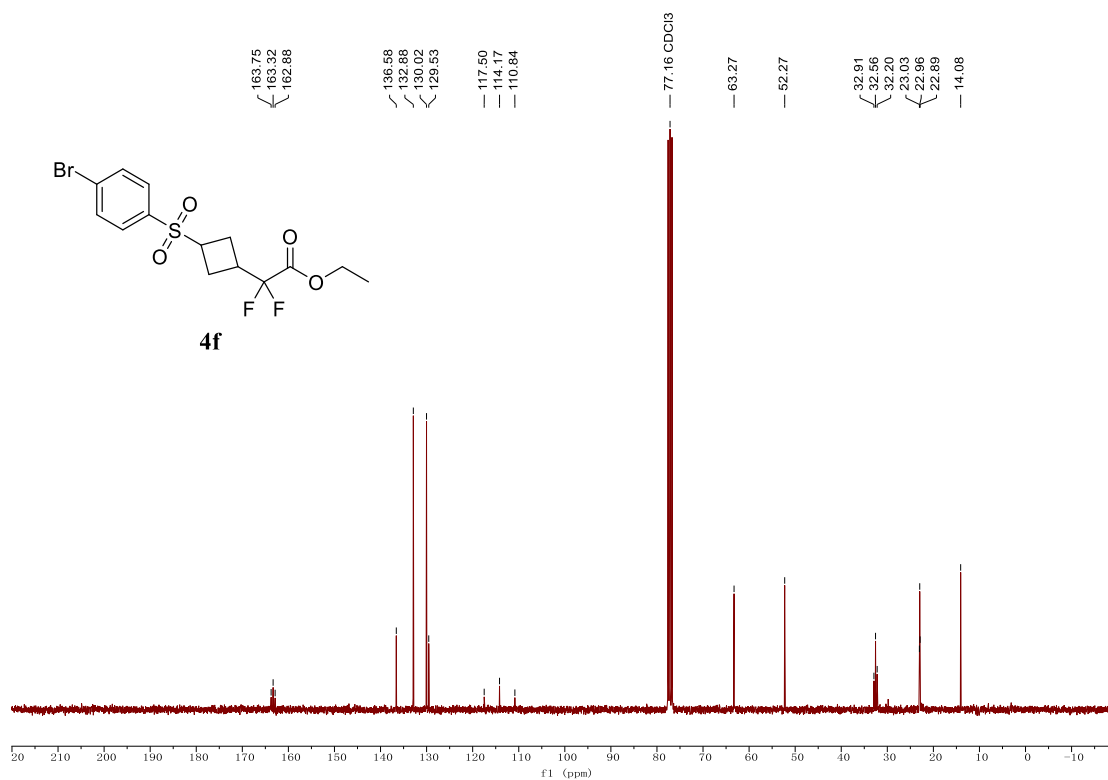

<sup>19</sup>F NMR Spectrum of Compound **4f** (282 MHz, CDCl<sub>3</sub>)

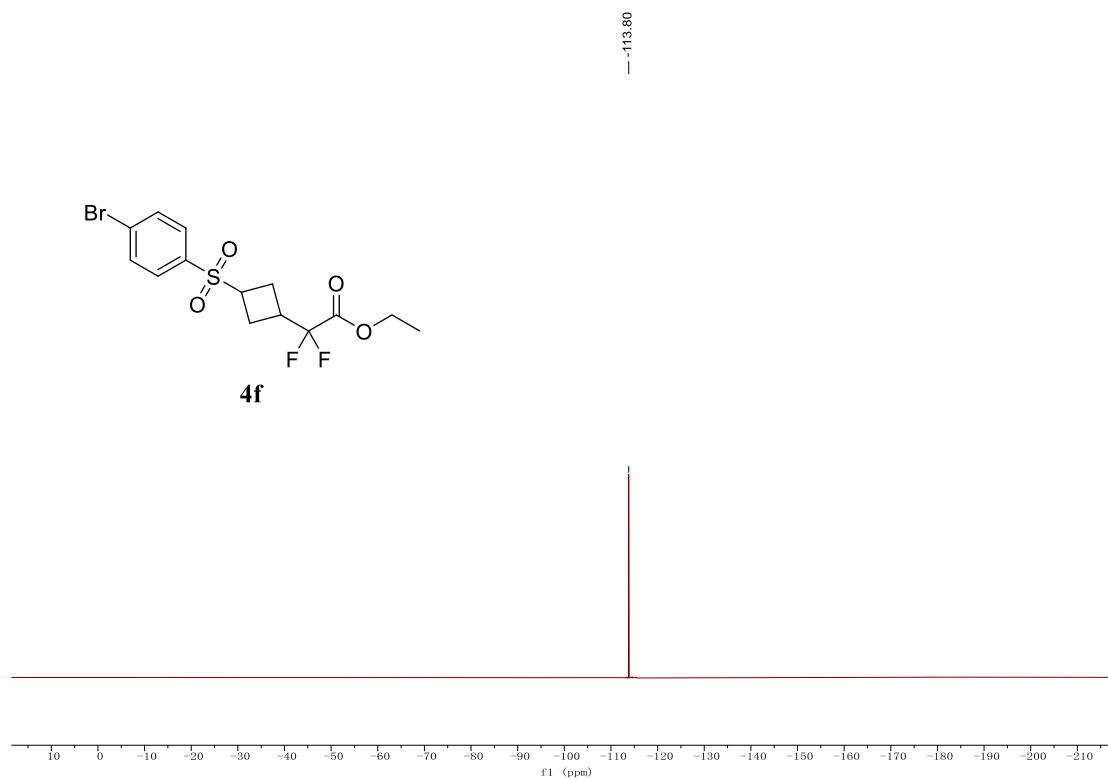

<sup>1</sup>H NMR Spectrum of Compound **4g** (300 MHz, CDCl<sub>3</sub>)

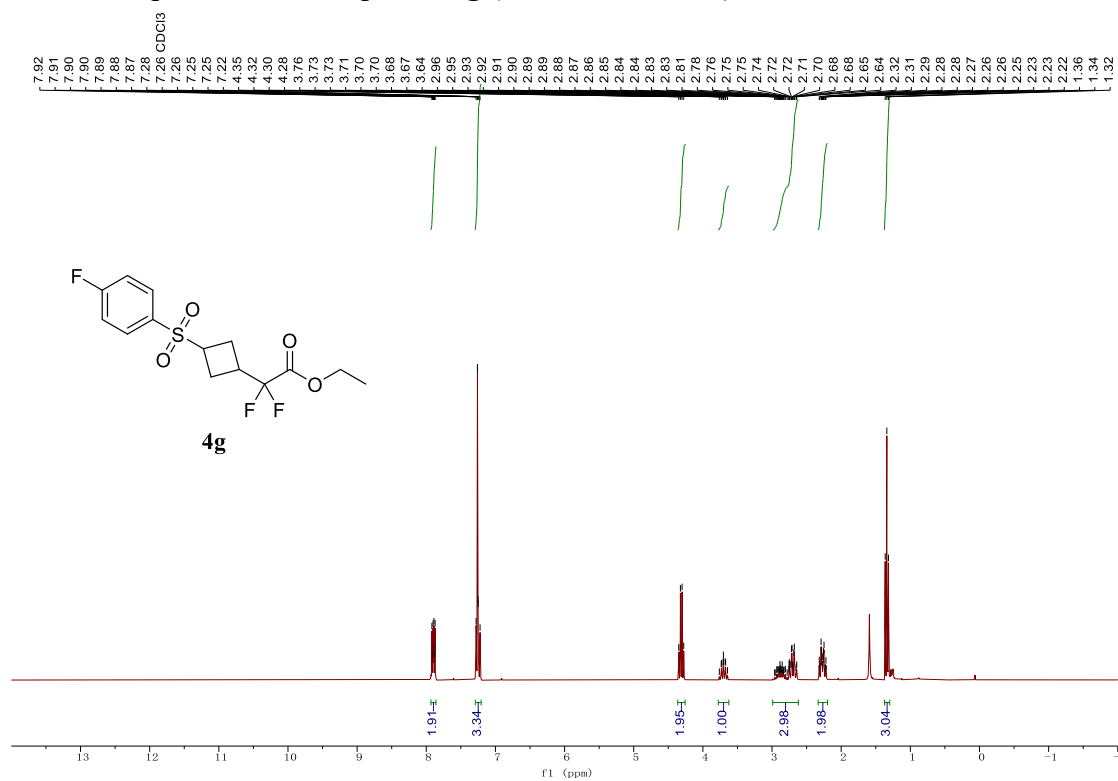

<sup>13</sup>C NMR Spectrum of Compound **4g** (75 MHz, CDCl<sub>3</sub>)

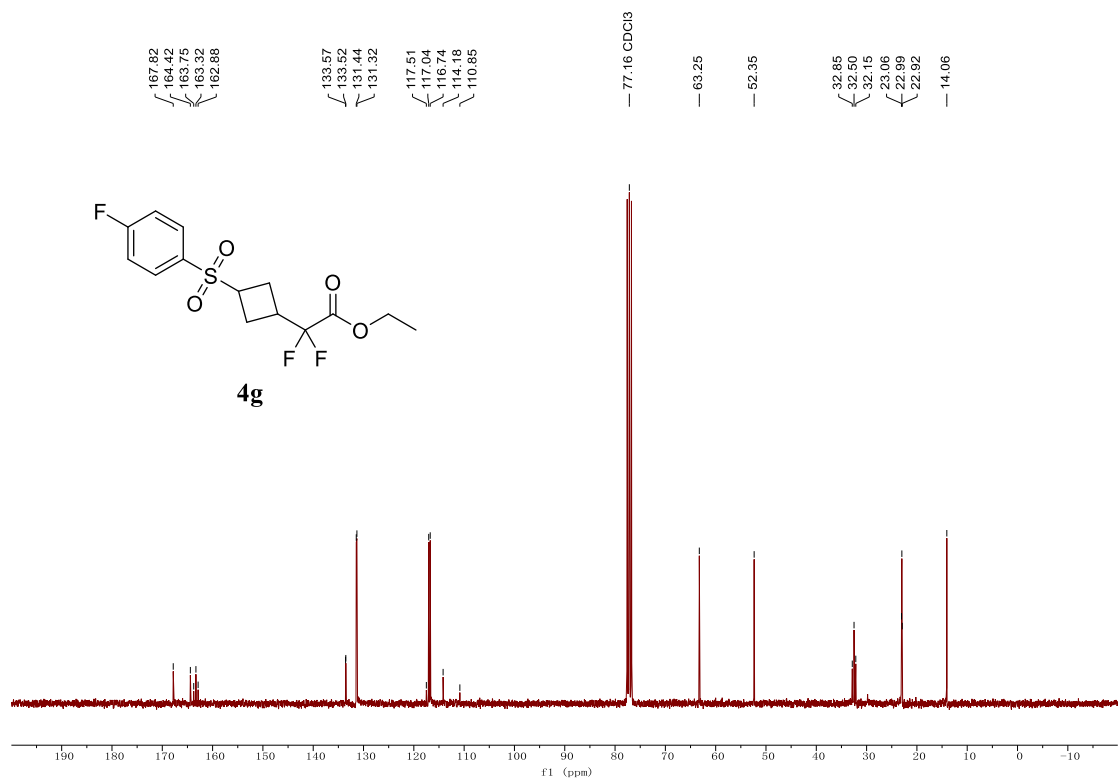

<sup>19</sup>F NMR Spectrum of Compound **4g** (282 MHz, CDCl<sub>3</sub>)

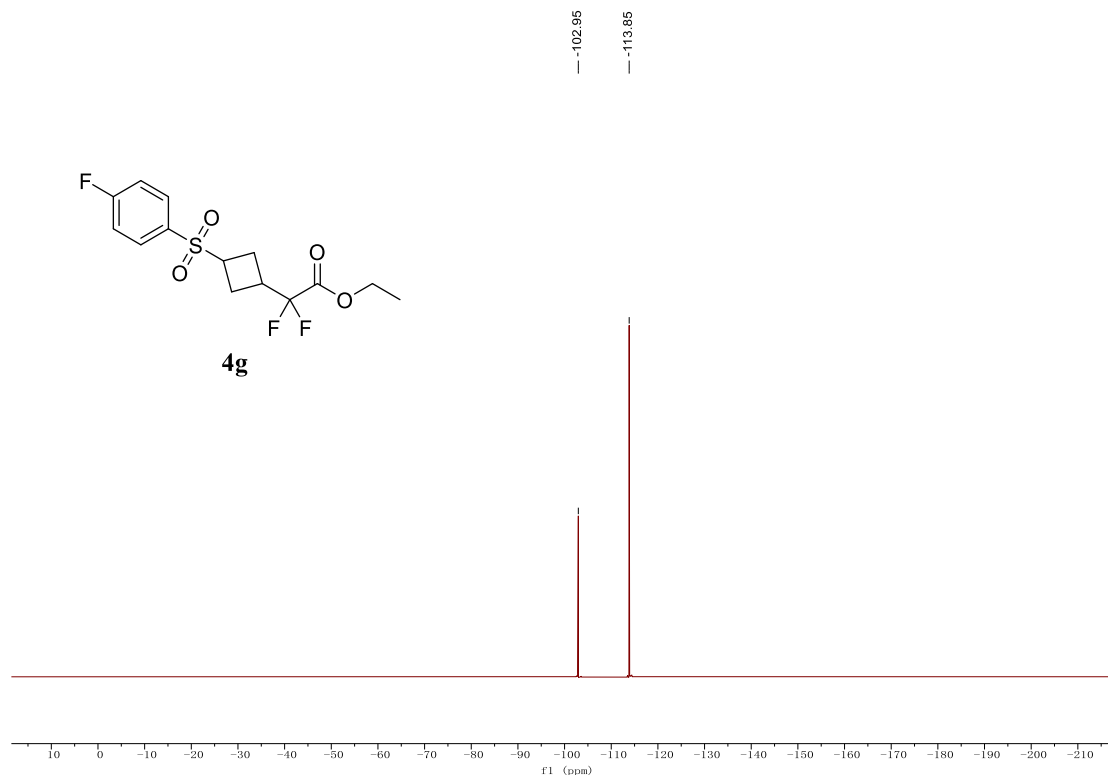

<sup>1</sup>H NMR Spectrum of Compound **4h** (300 MHz, CDCl<sub>3</sub>)

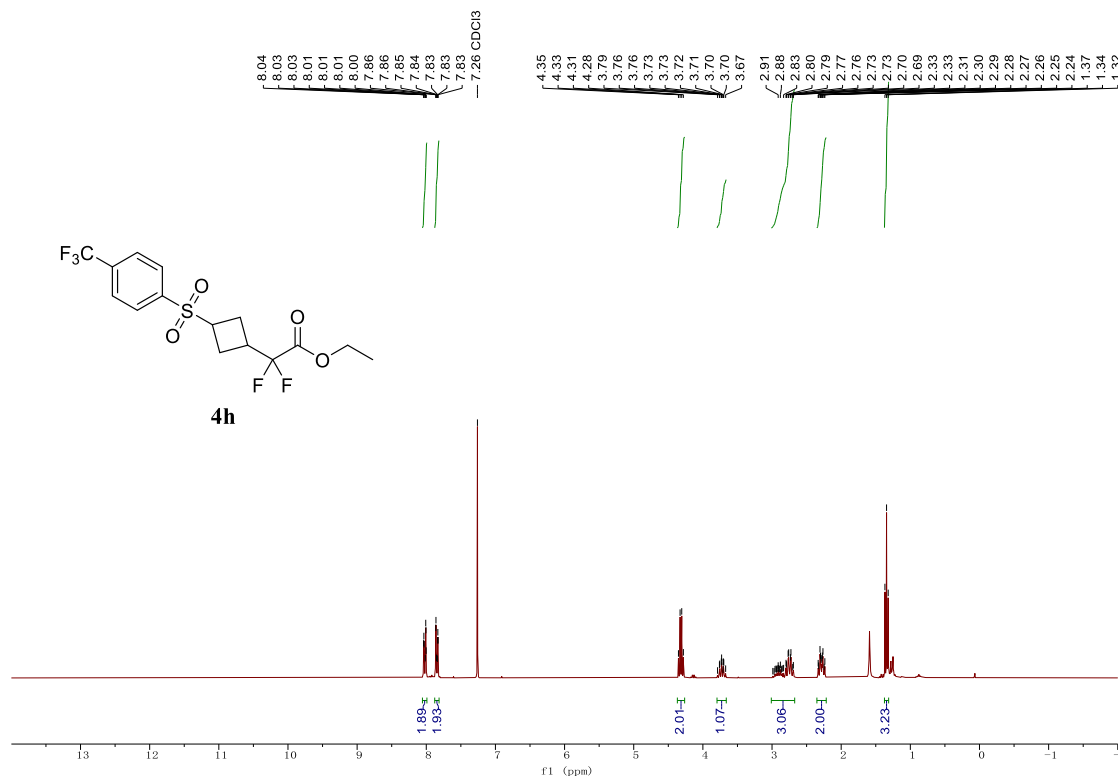

### <sup>13</sup>C NMR Spectrum of Compound **4h** (75 MHz, CDCl<sub>3</sub>)

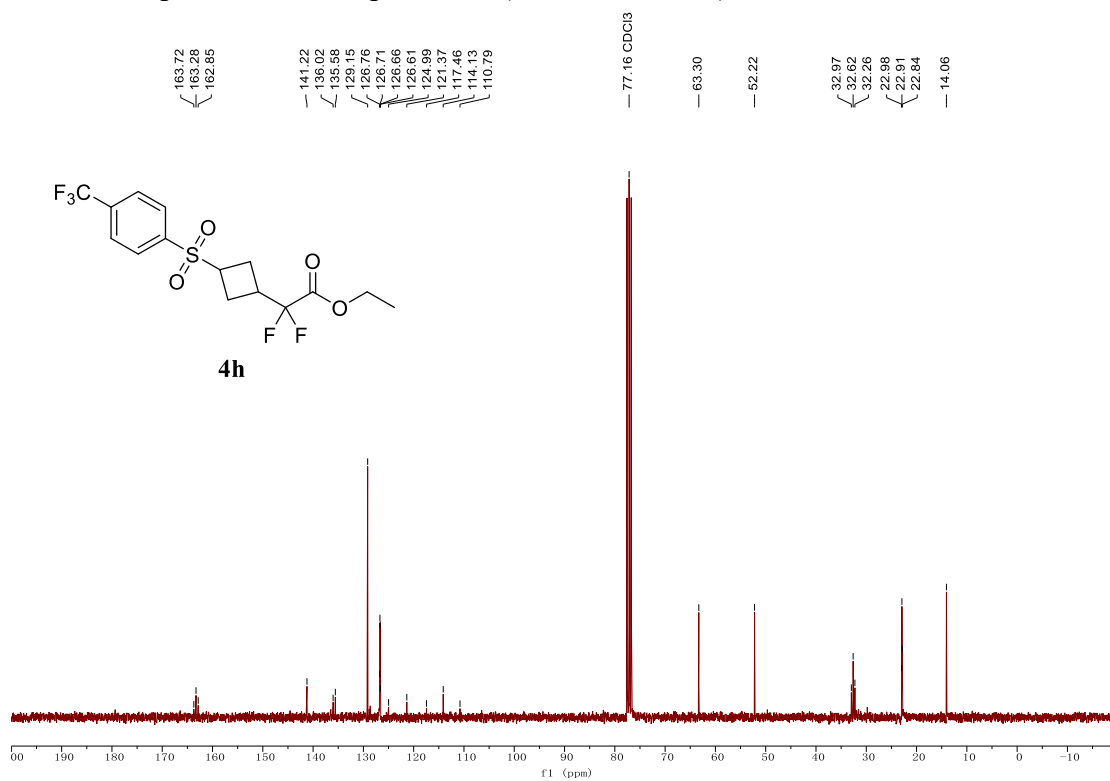

### <sup>19</sup>F NMR Spectrum of Compound **4h** (282 MHz, CDCl<sub>3</sub>)

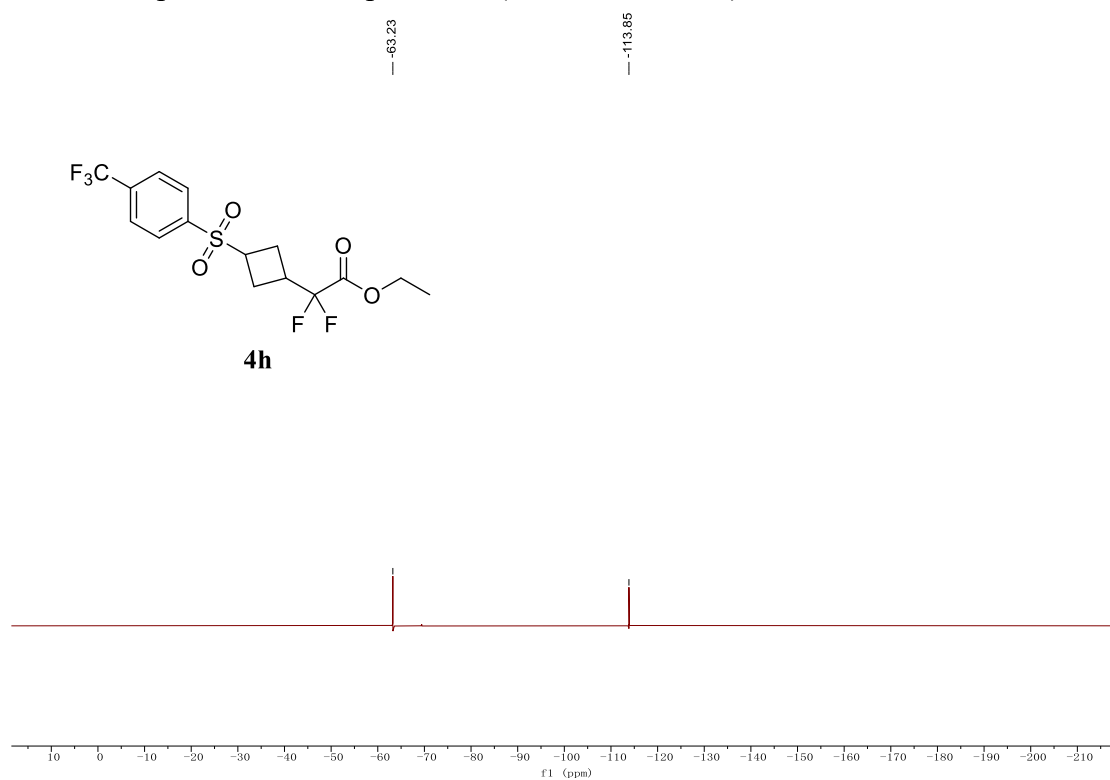

<sup>1</sup>H NMR Spectrum of Compound **4i** (300 MHz, CDCl<sub>3</sub>)

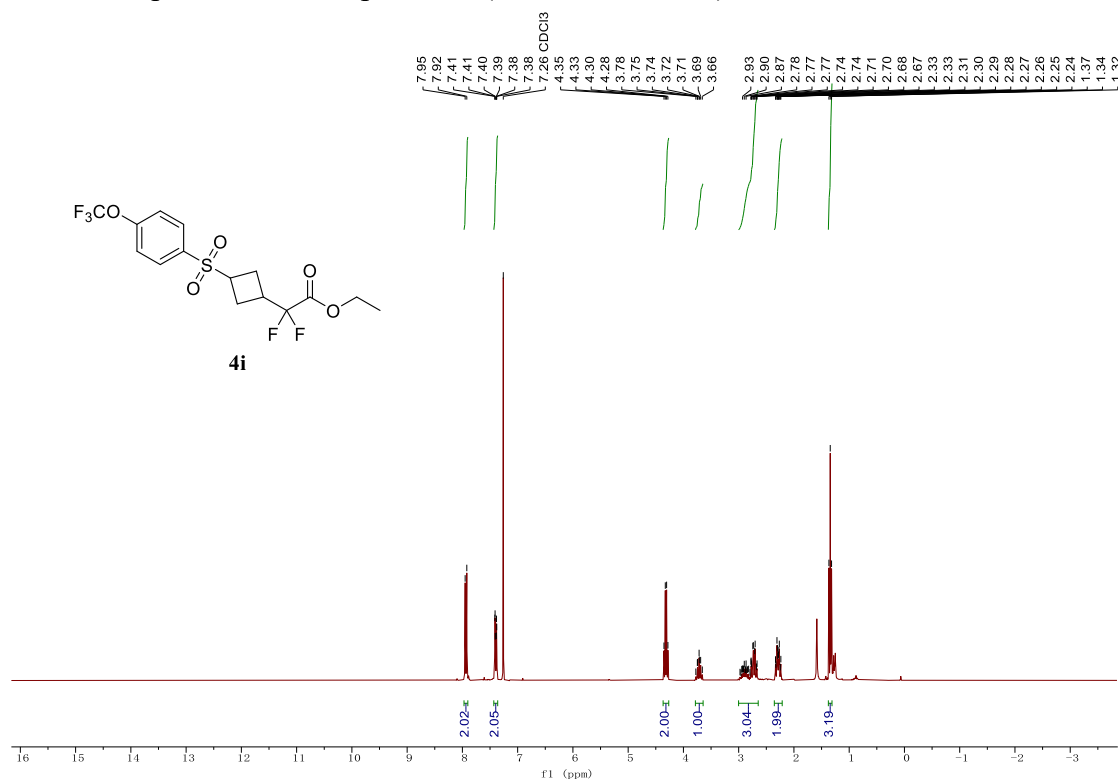

<sup>13</sup>C NMR Spectrum of Compound **4i** (75 MHz, CDCl<sub>3</sub>)

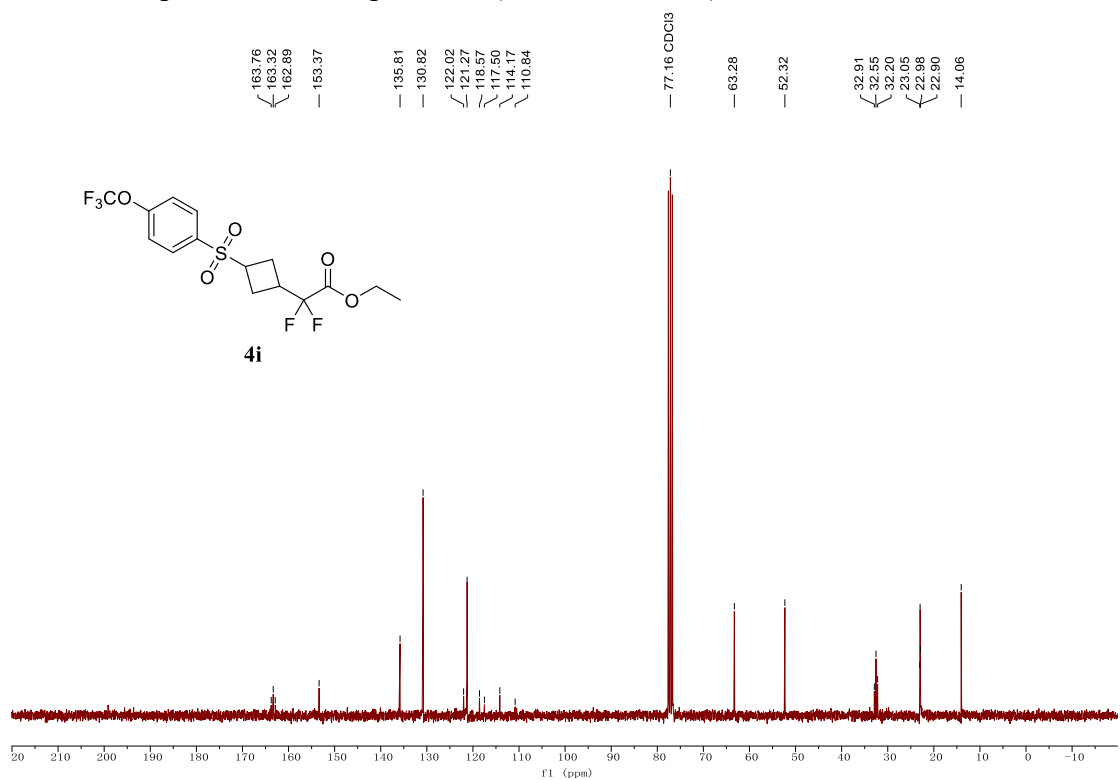



<sup>19</sup>F NMR Spectrum of Compound **4i** (282 MHz, CDCl<sub>3</sub>)

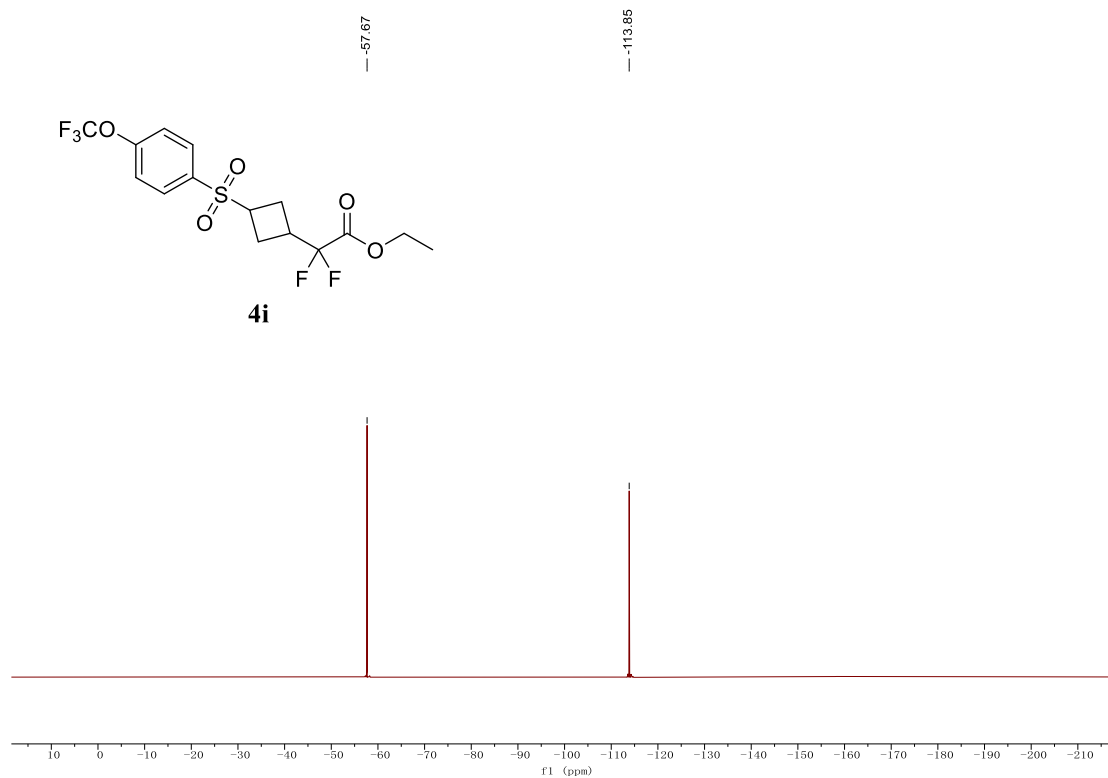

<sup>1</sup>H NMR Spectrum of Compound **4j** (300 MHz, CDCl<sub>3</sub>)

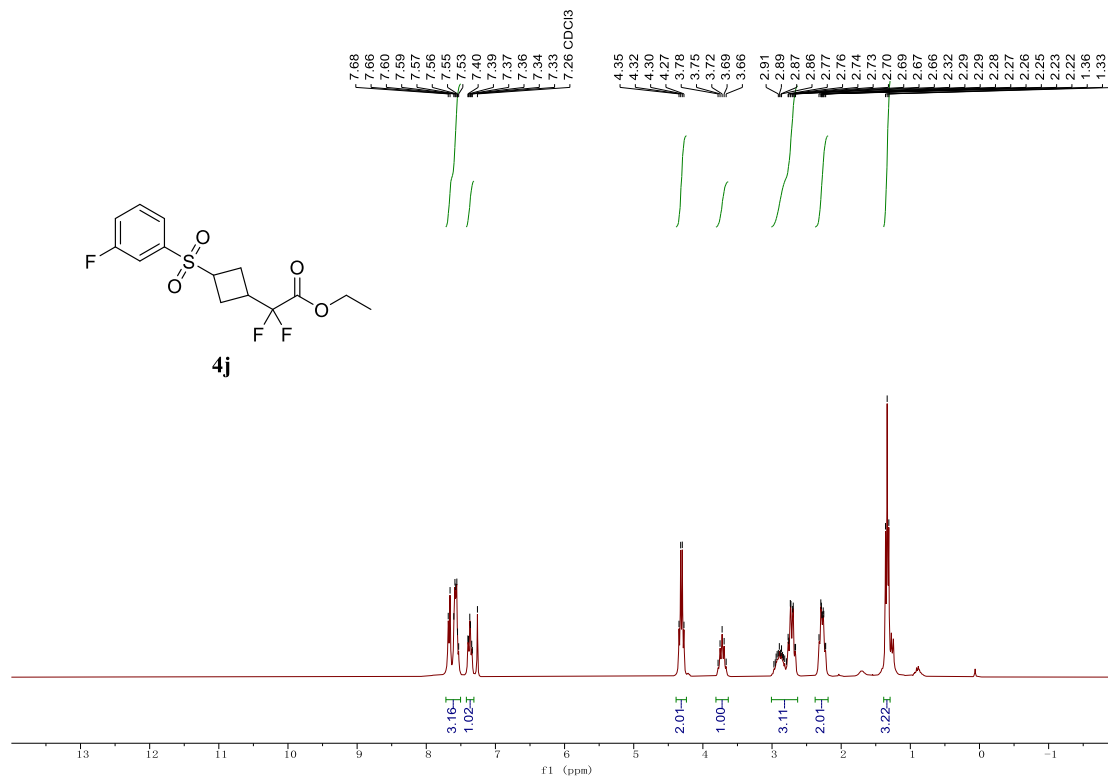

### <sup>13</sup>C NMR Spectrum of Compound **4j** (75 MHz, CDCl<sub>3</sub>)

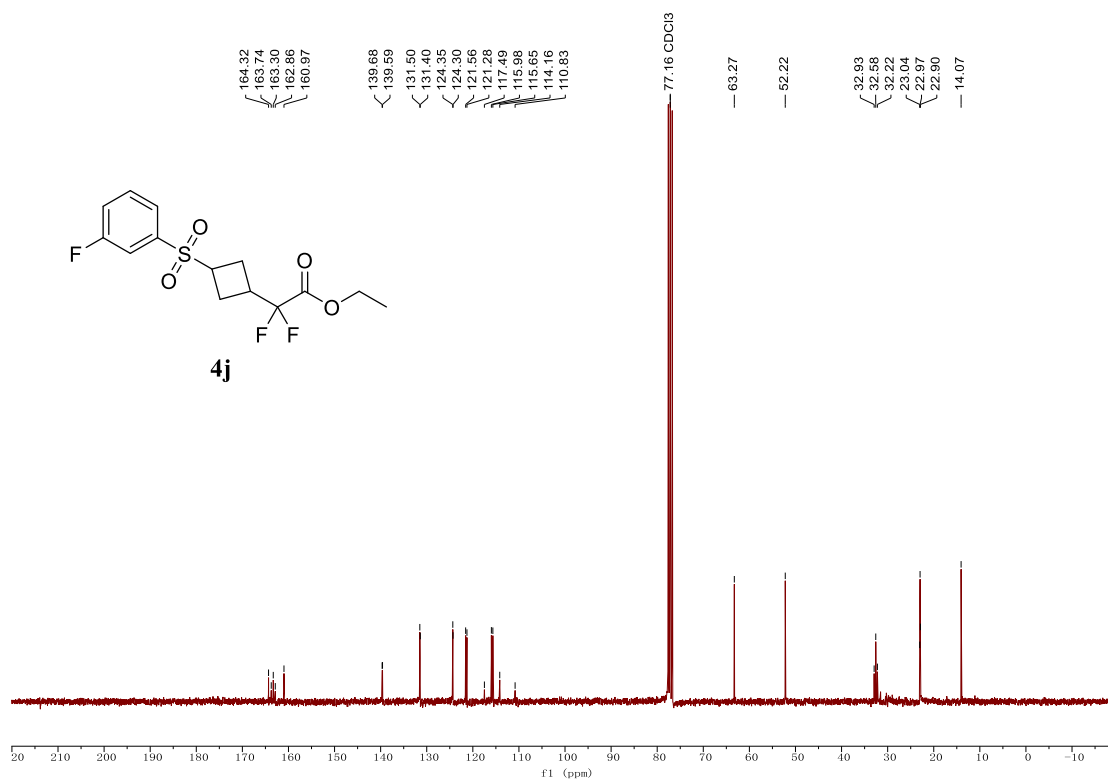

### <sup>19</sup>F NMR Spectrum of Compound **4j** (282 MHz, CDCl<sub>3</sub>)

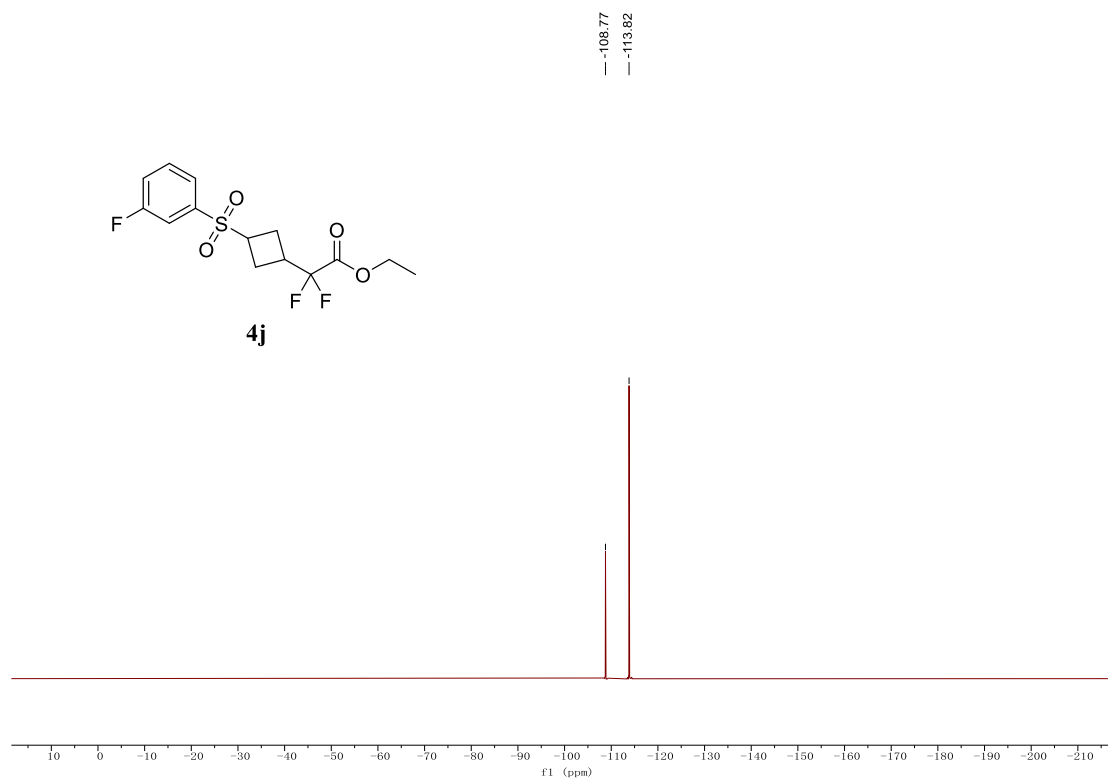

# $^1\text{H}$ NMR Spectrum of Compound **4k** (300 MHz, $\text{CDCl}_3$ )

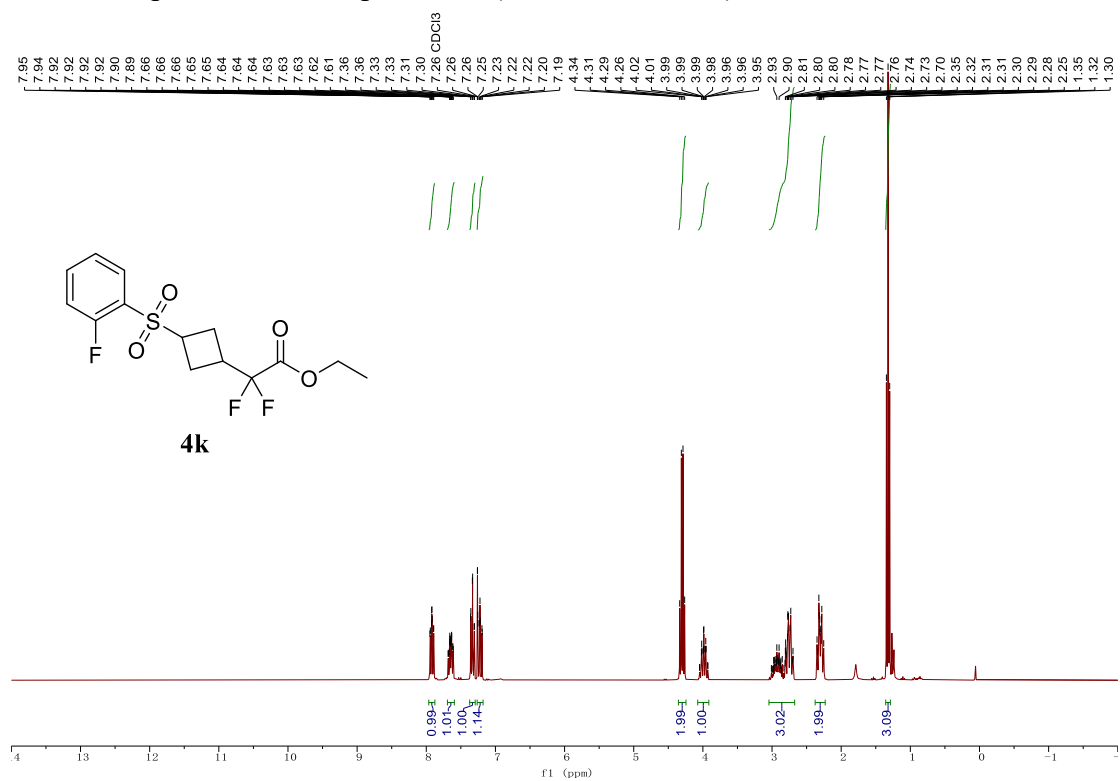

# $^{13}\text{C}$ NMR Spectrum of Compound **4k** (75 MHz, $\text{CDCl}_3$ )

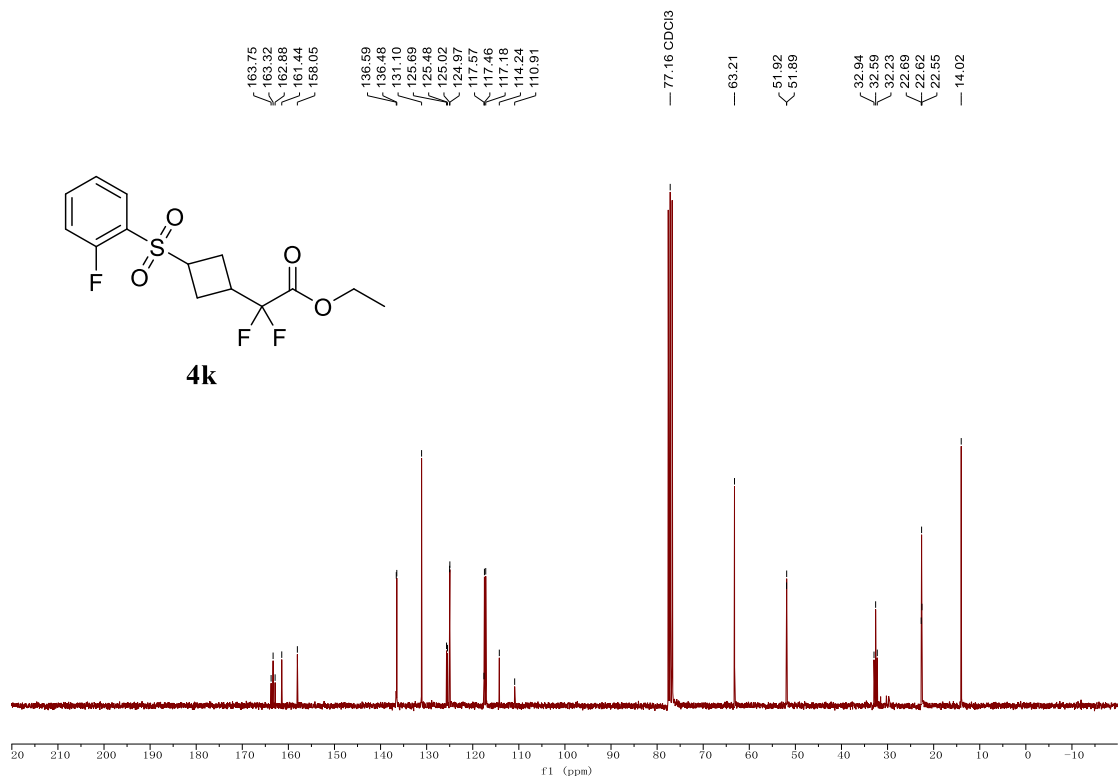

<sup>19</sup>F NMR Spectrum of Compound **4k** (282 MHz, CDCl<sub>3</sub>)

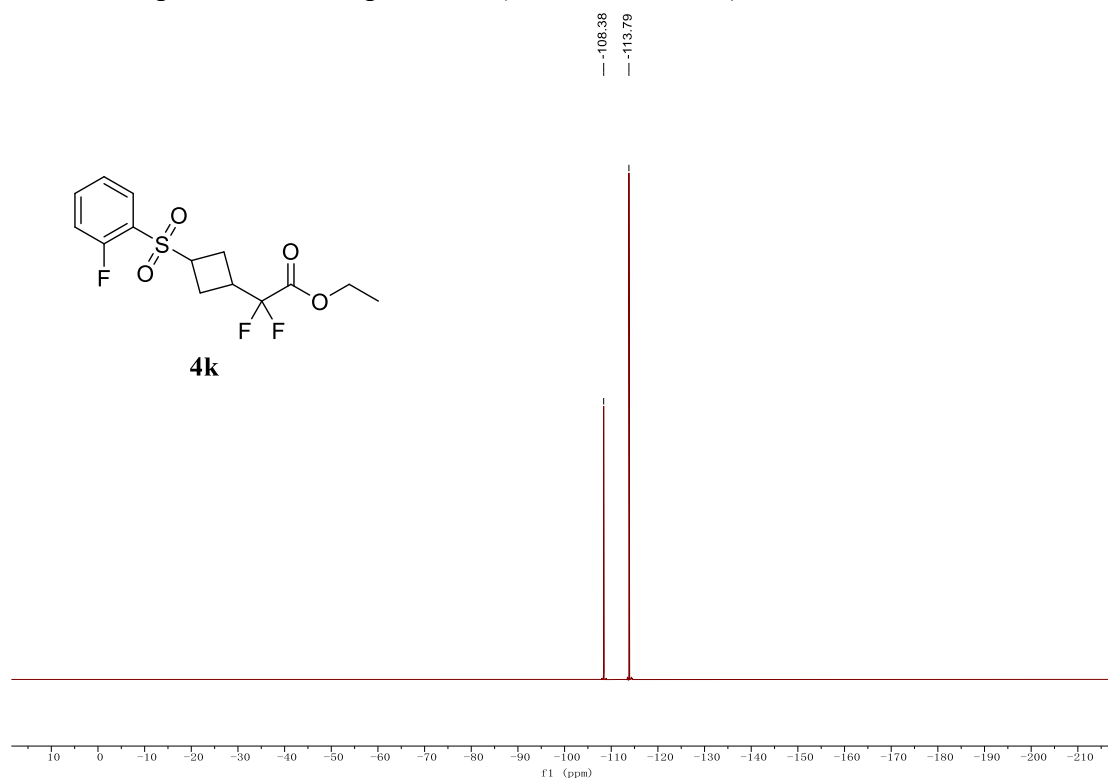

<sup>1</sup>H NMR Spectrum of Compound **4l** (300 MHz, CDCl<sub>3</sub>)

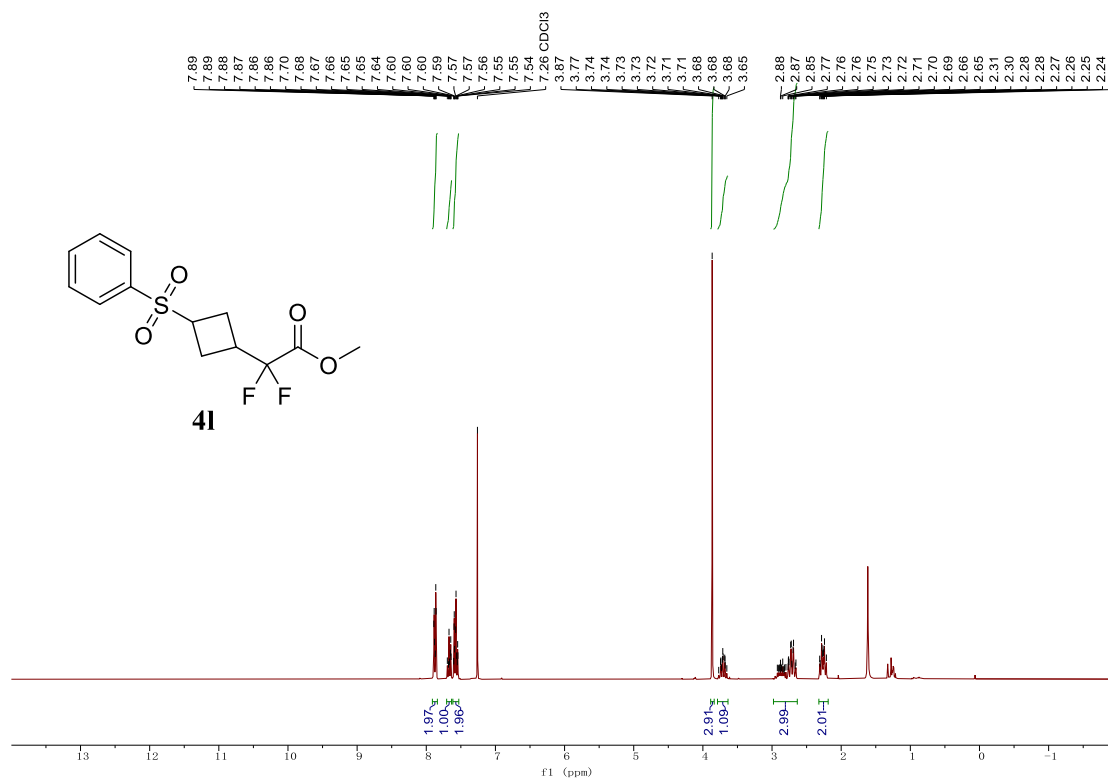

<sup>13</sup>C NMR Spectrum of Compound **4I** (101 MHz, CDCl<sub>3</sub>)

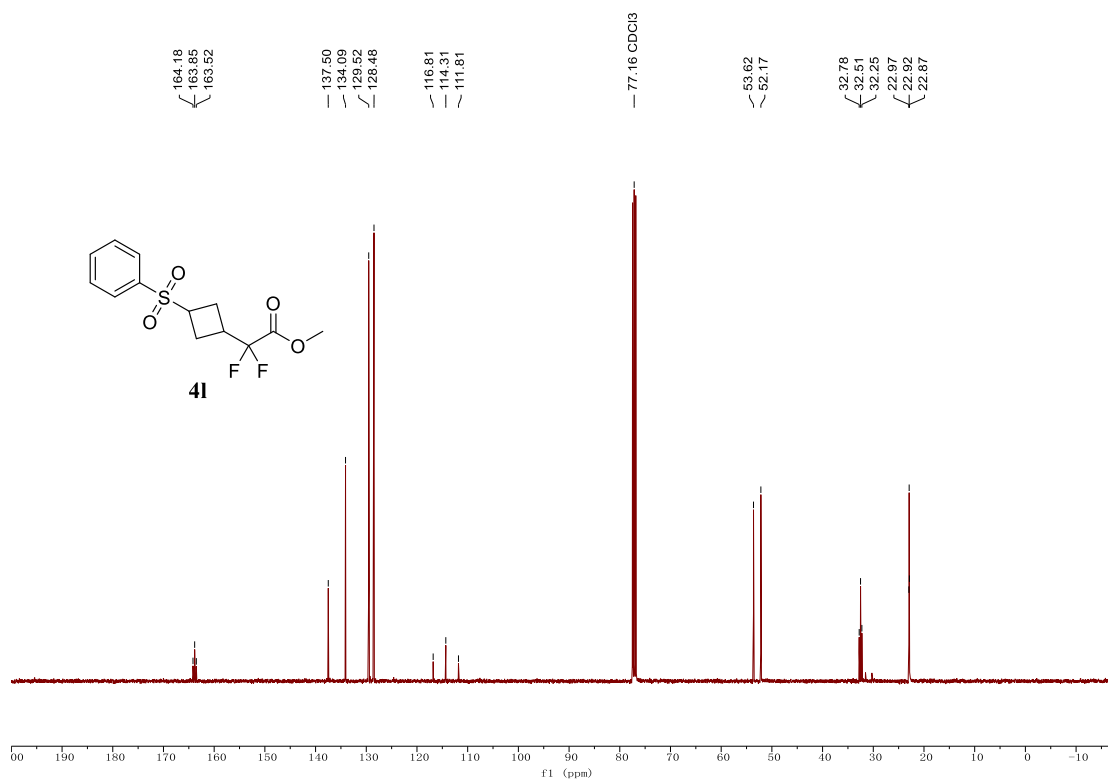

<sup>19</sup>F NMR Spectrum of Compound **4I** (282 MHz, CDCl<sub>3</sub>)

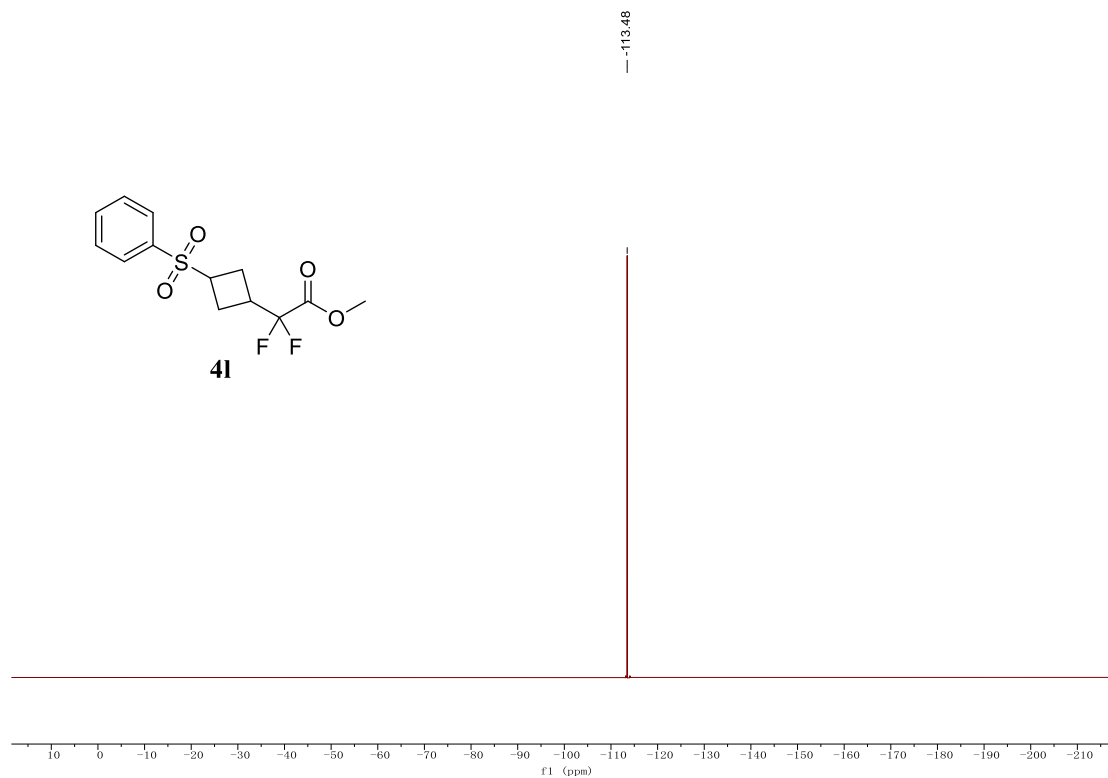

# $^1\text{H}$ NMR Spectrum of Compound **4m** (300 MHz, $\text{CDCl}_3$ )

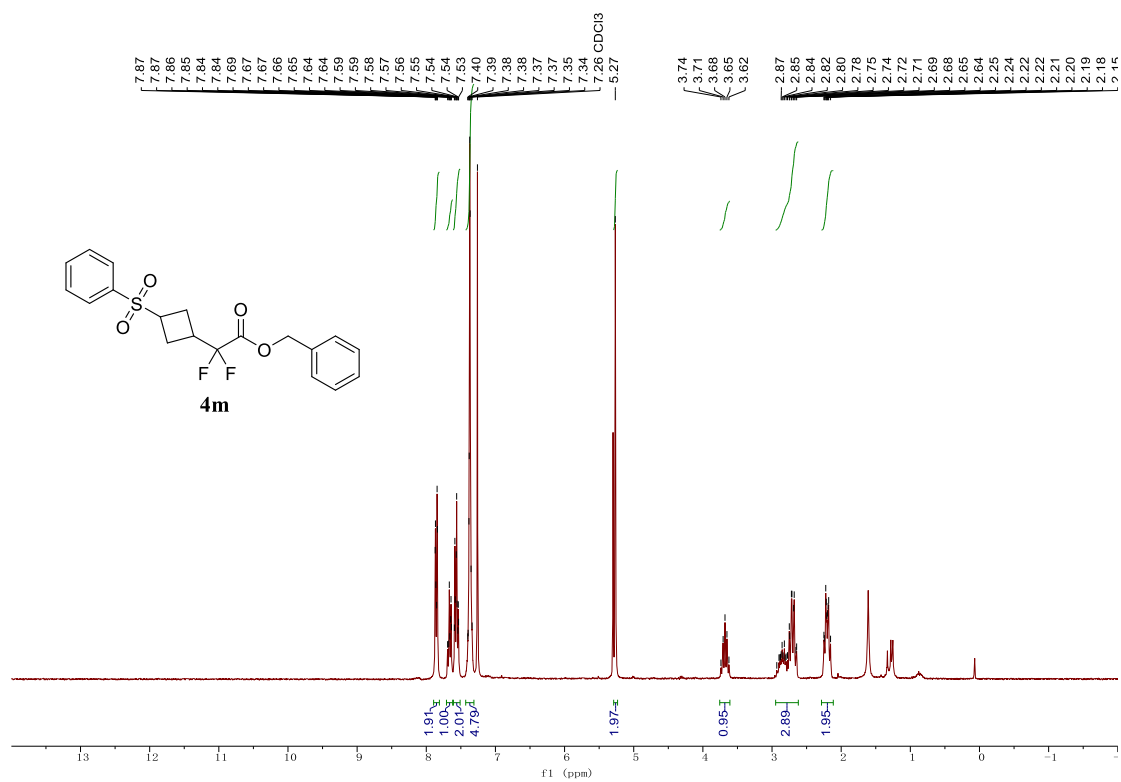

# $^{13}\text{C}$ NMR Spectrum of Compound **4m** (101 MHz, $\text{CDCl}_3$ )

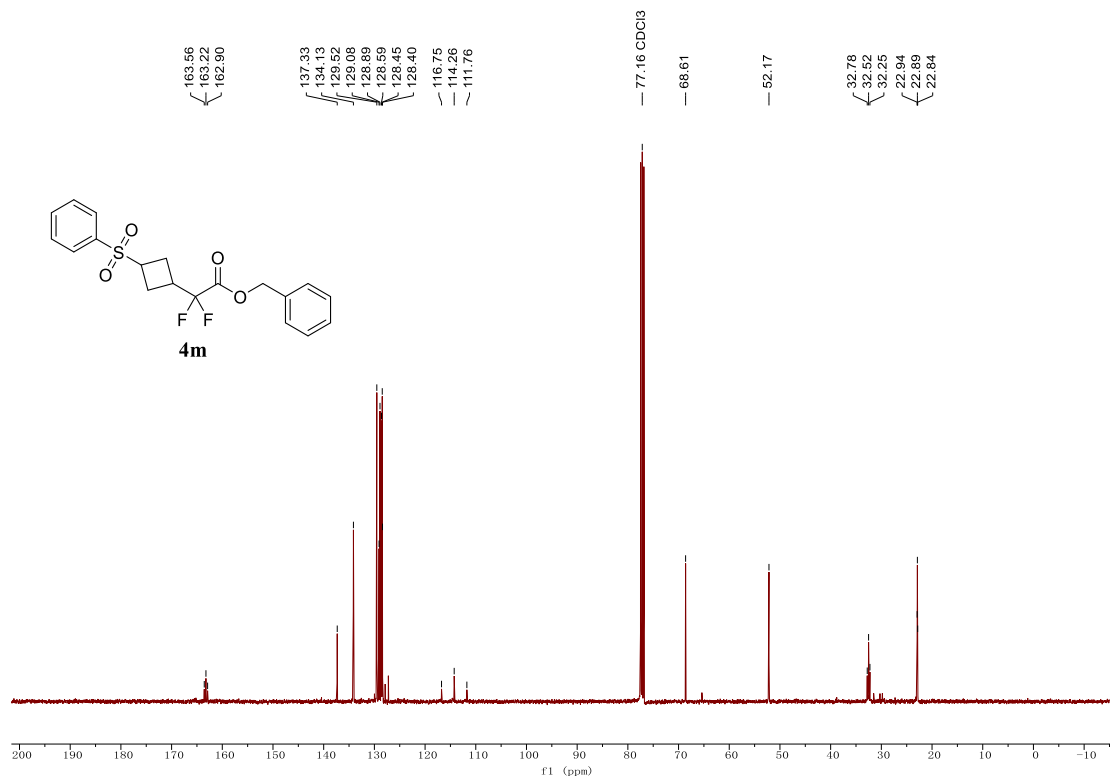

<sup>19</sup>F NMR Spectrum of Compound **4m** (282 MHz, CDCl<sub>3</sub>)

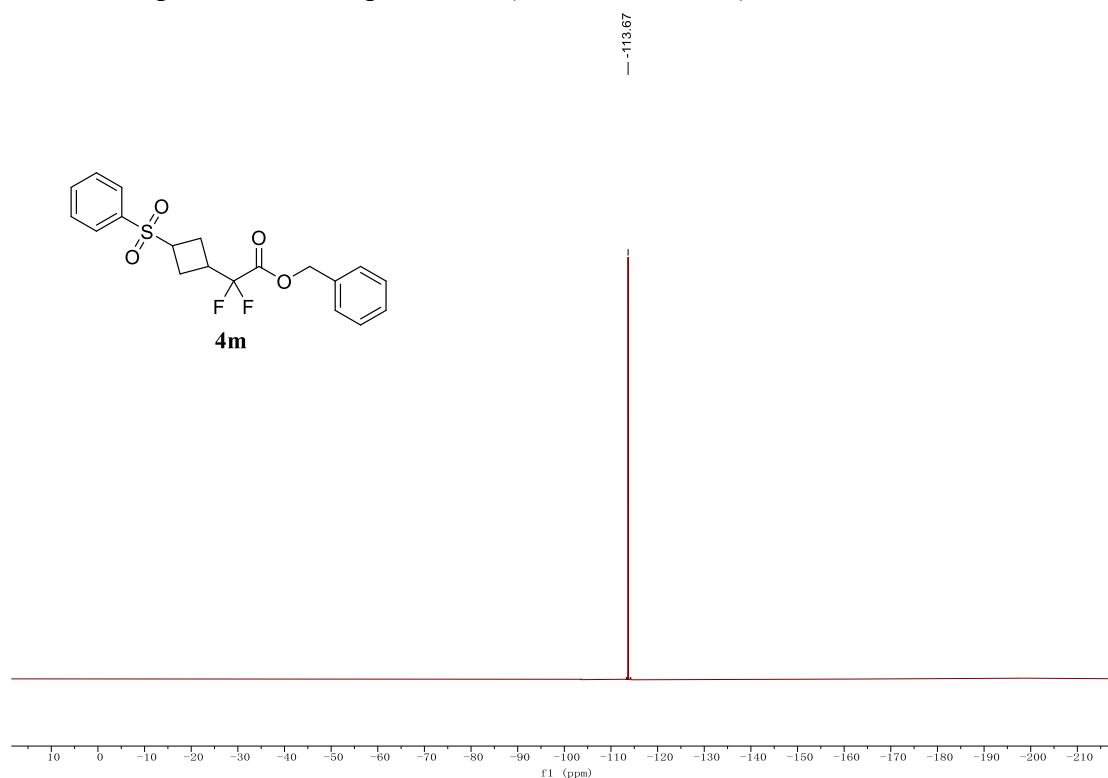

<sup>1</sup>H NMR Spectrum of Compound **4n** (300 MHz, CDCl<sub>3</sub>)

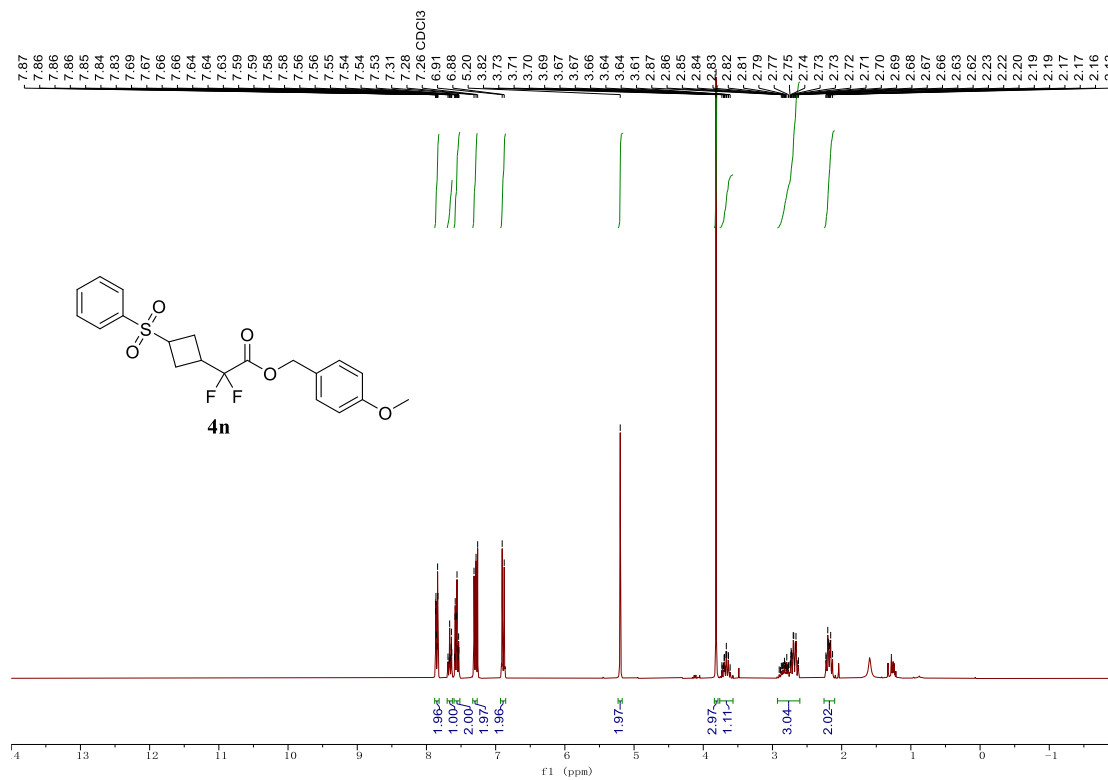

<sup>13</sup>C NMR Spectrum of Compound **4n** (75 MHz, CDCl<sub>3</sub>)

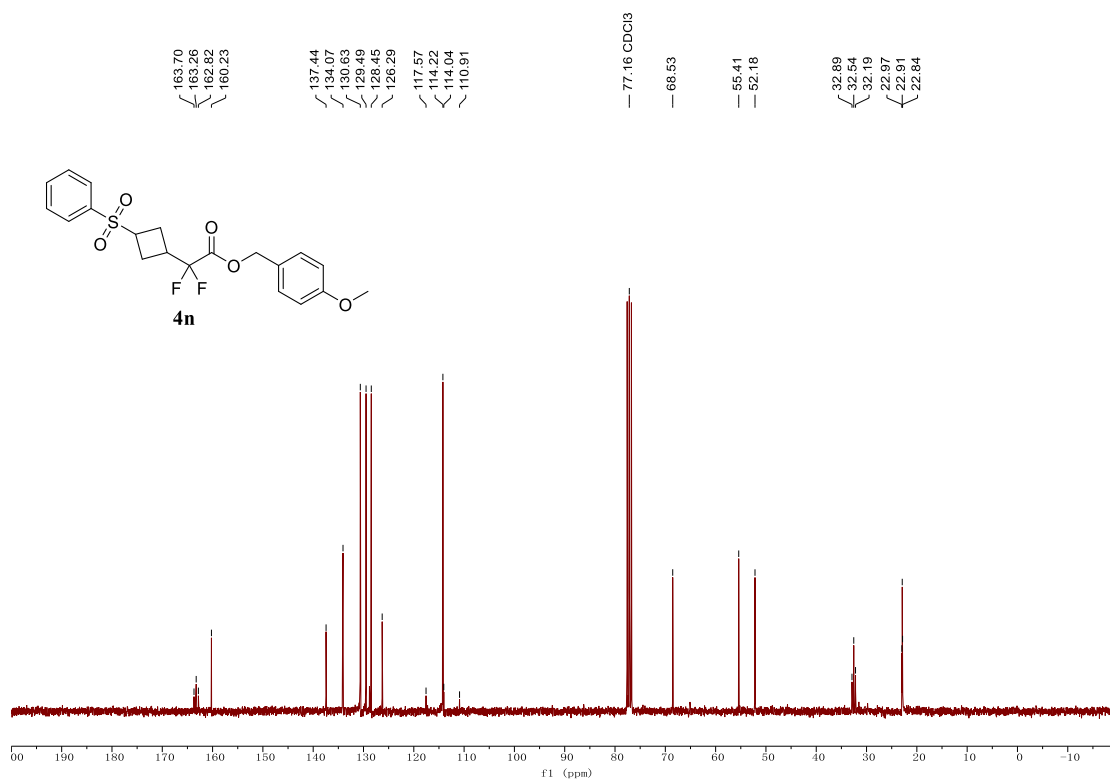

<sup>19</sup>F NMR Spectrum of Compound **4n** (282 MHz, CDCl<sub>3</sub>)

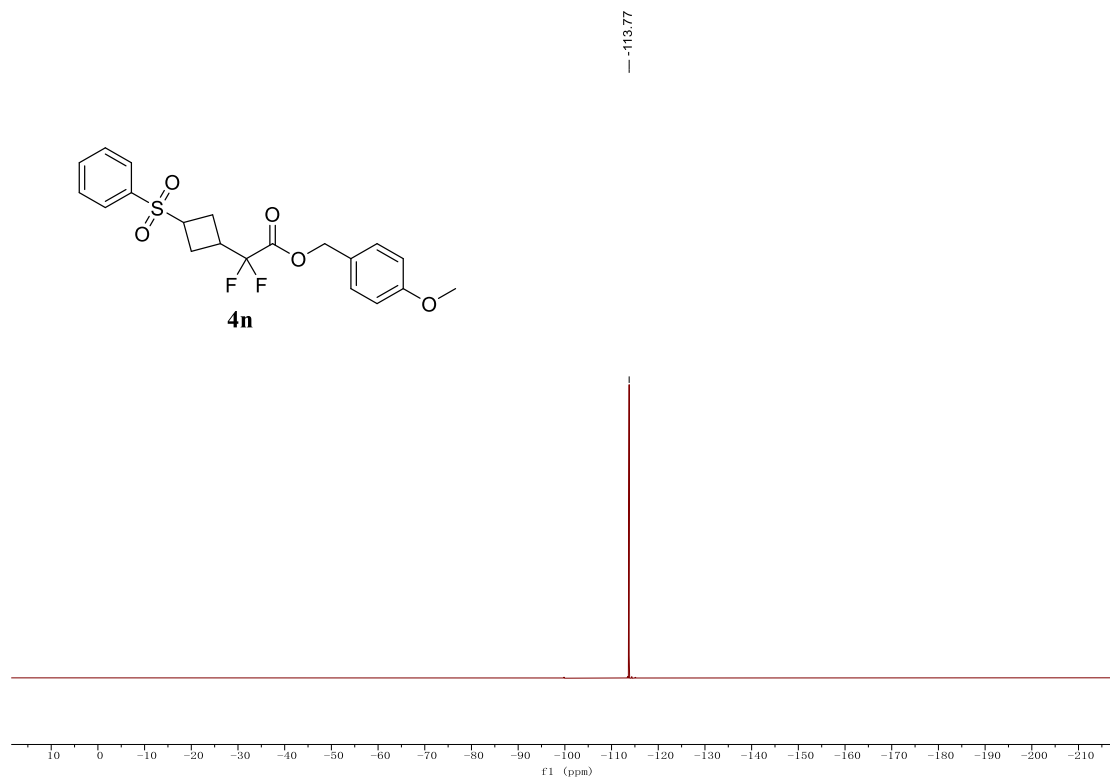



# <sup>1</sup>H NMR Spectrum of Compound **4o** (300 MHz, CDCl<sub>3</sub>)

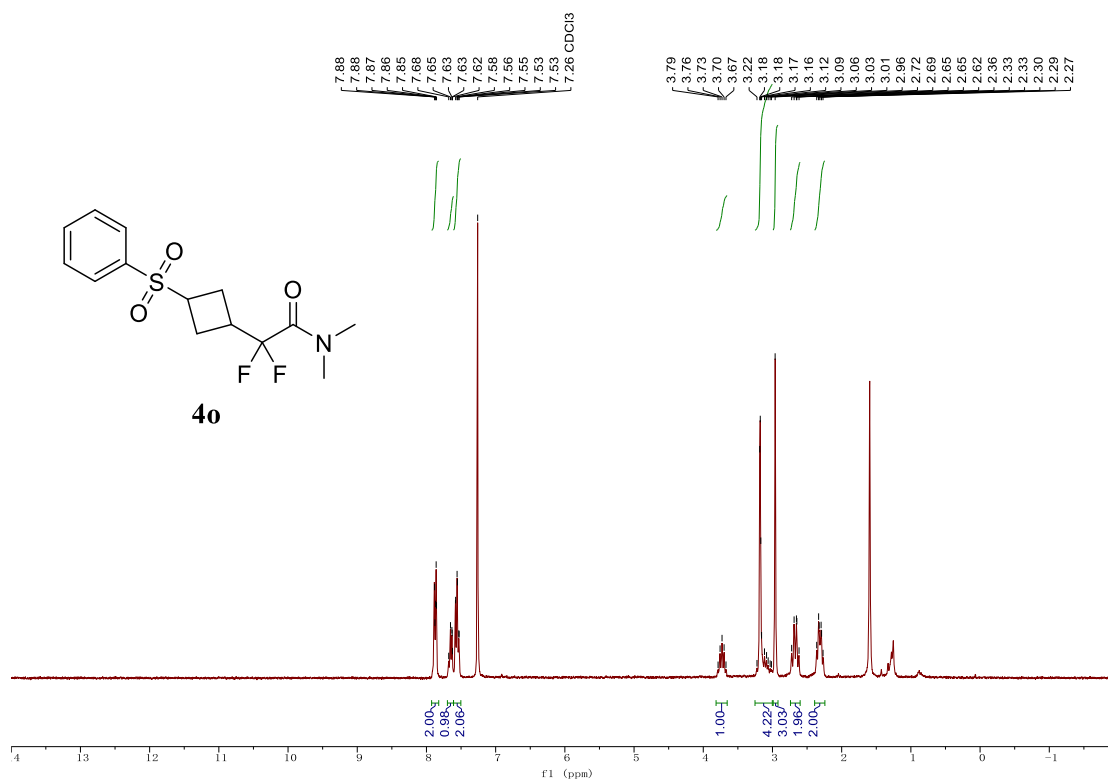

# <sup>13</sup>C NMR Spectrum of Compound **4o** (75 MHz, CDCl<sub>3</sub>)

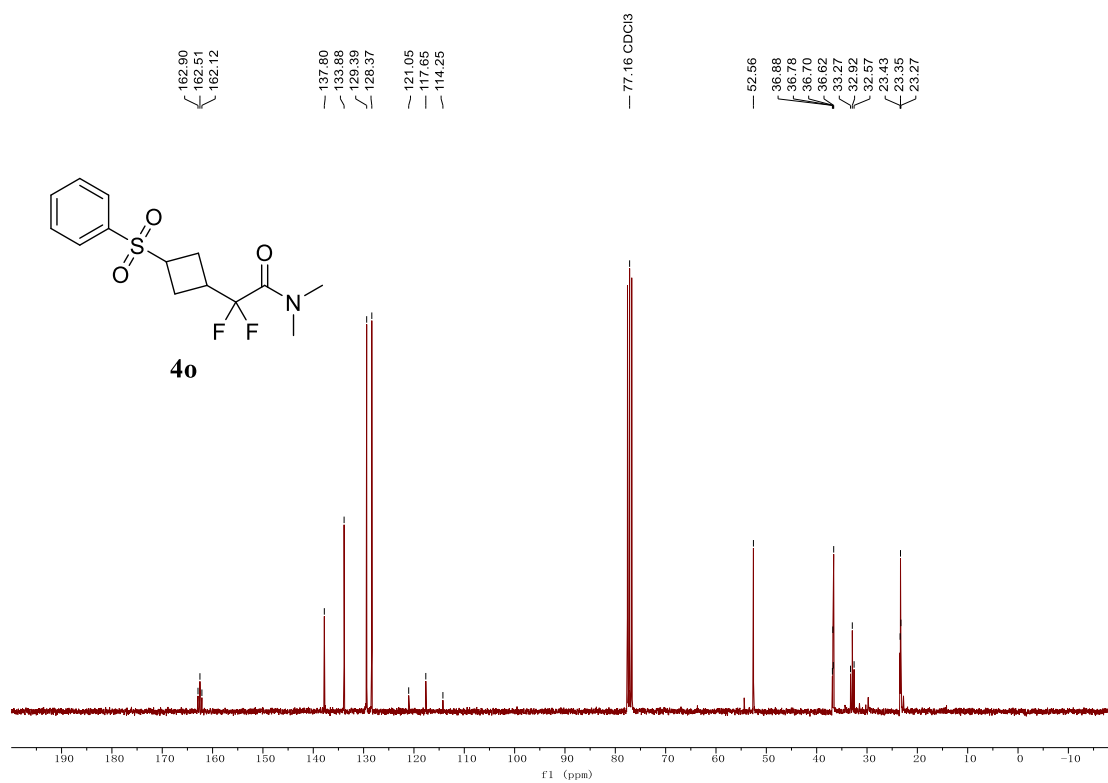

<sup>19</sup>F NMR Spectrum of Compound **4o** (282 MHz, CDCl<sub>3</sub>)

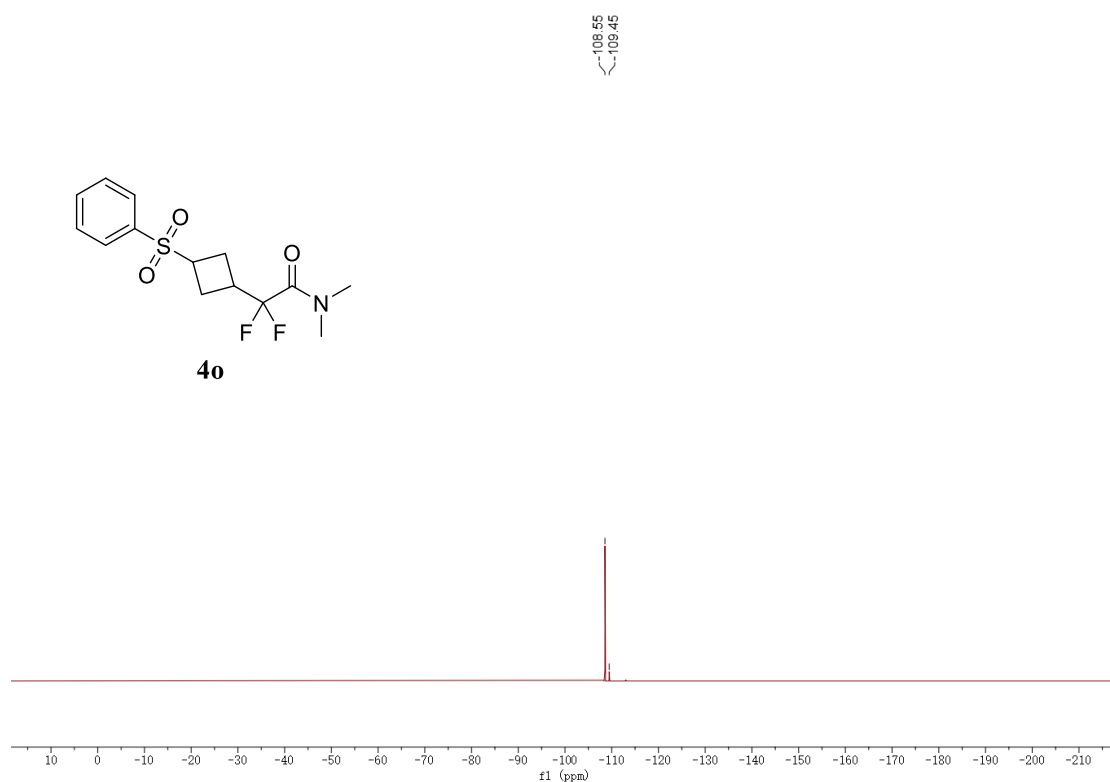

<sup>1</sup>H NMR Spectrum of Compound **4p** (300 MHz, CDCl<sub>3</sub>)

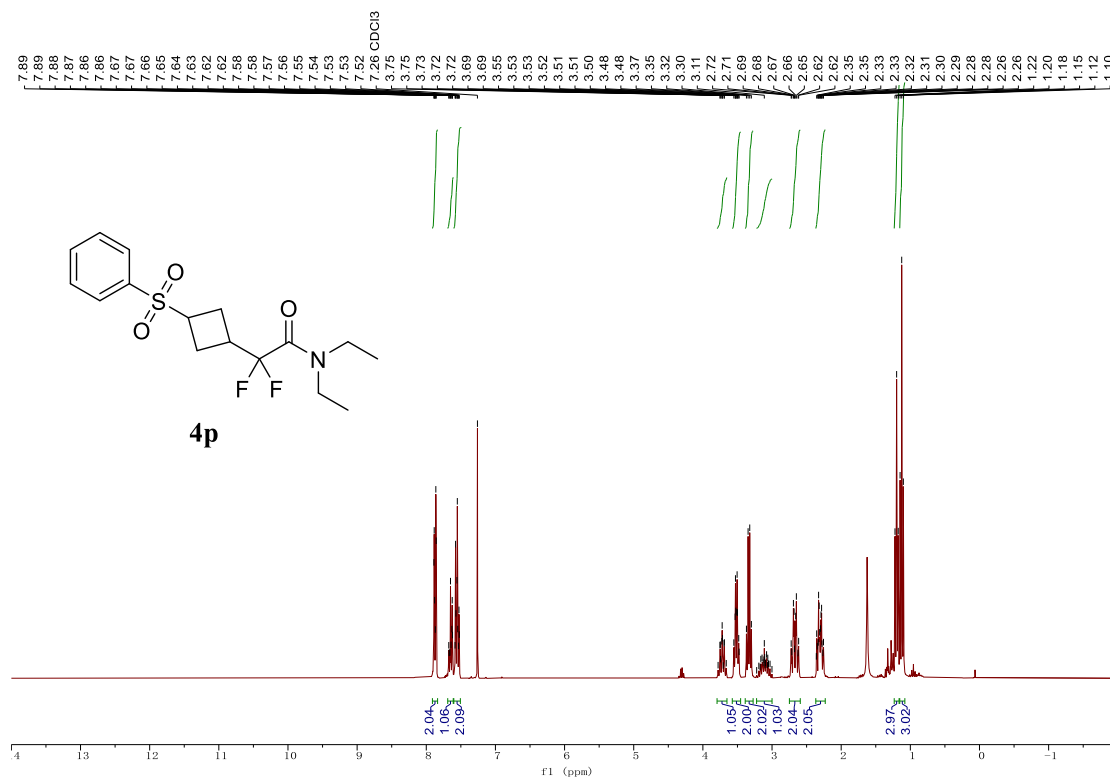

### <sup>13</sup>C NMR Spectrum of Compound **4p** (75 MHz, CDCl<sub>3</sub>)

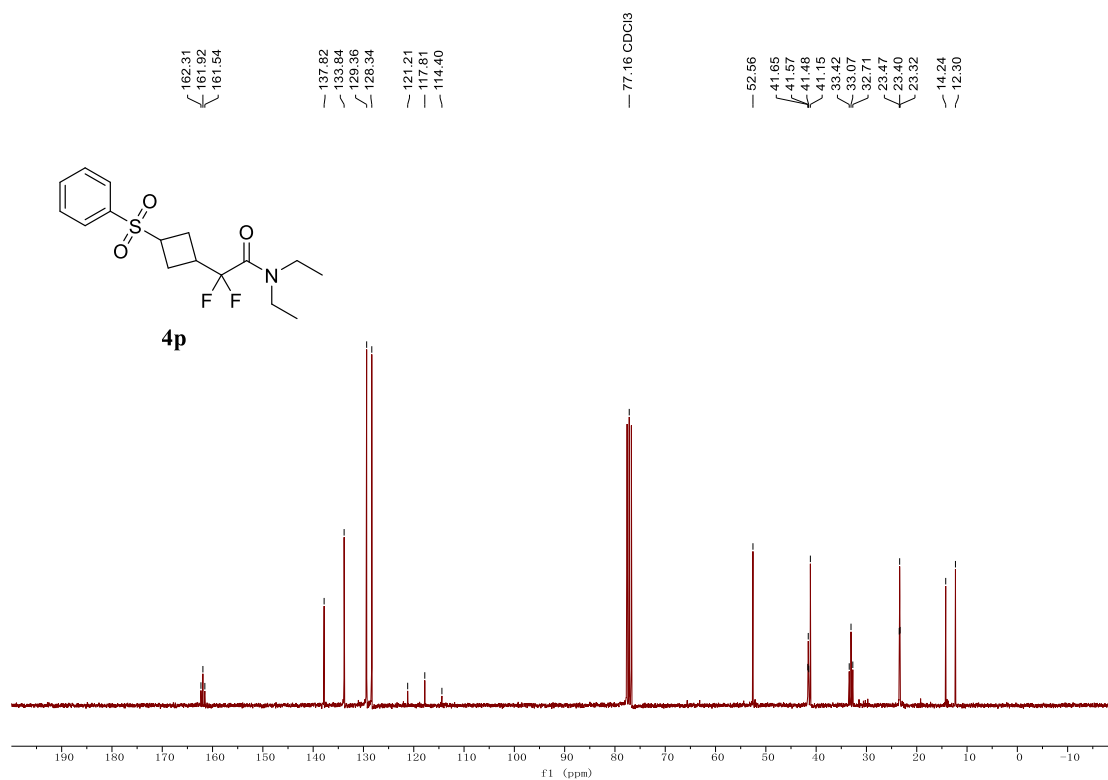

### <sup>19</sup>F NMR Spectrum of Compound **4p** (282 MHz, CDCl<sub>3</sub>)

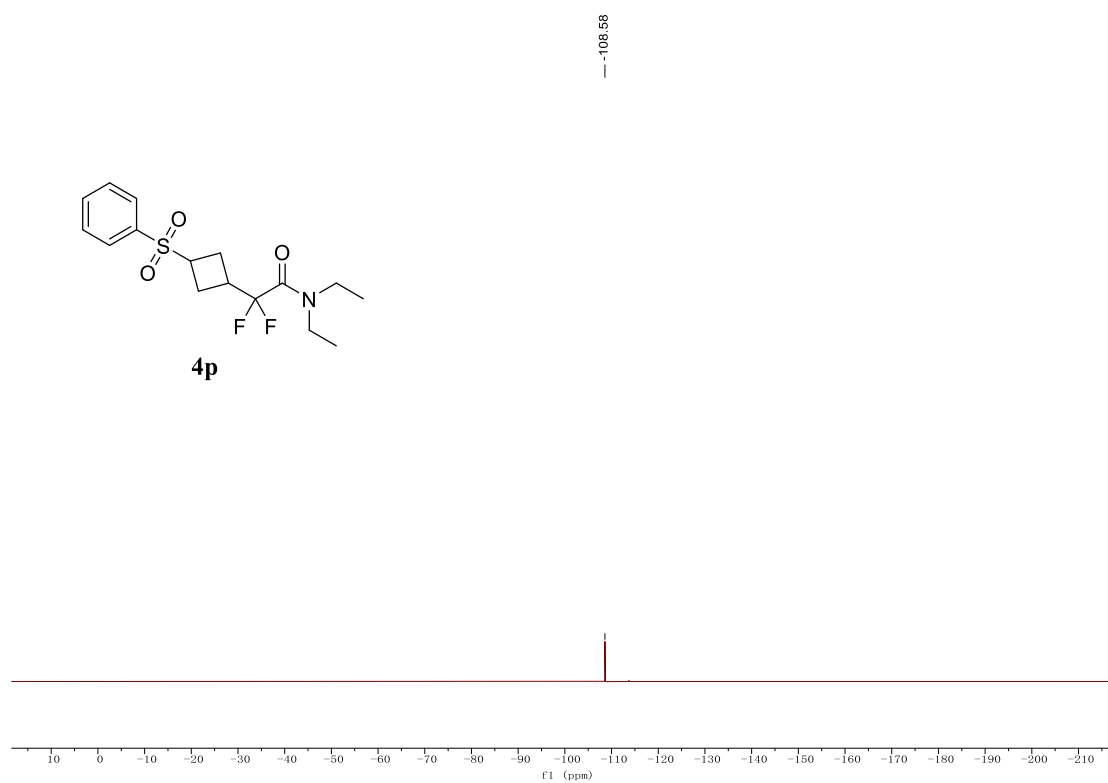

# <sup>1</sup>H NMR Spectrum of Compound **4q** (300 MHz, CDCl<sub>3</sub>)

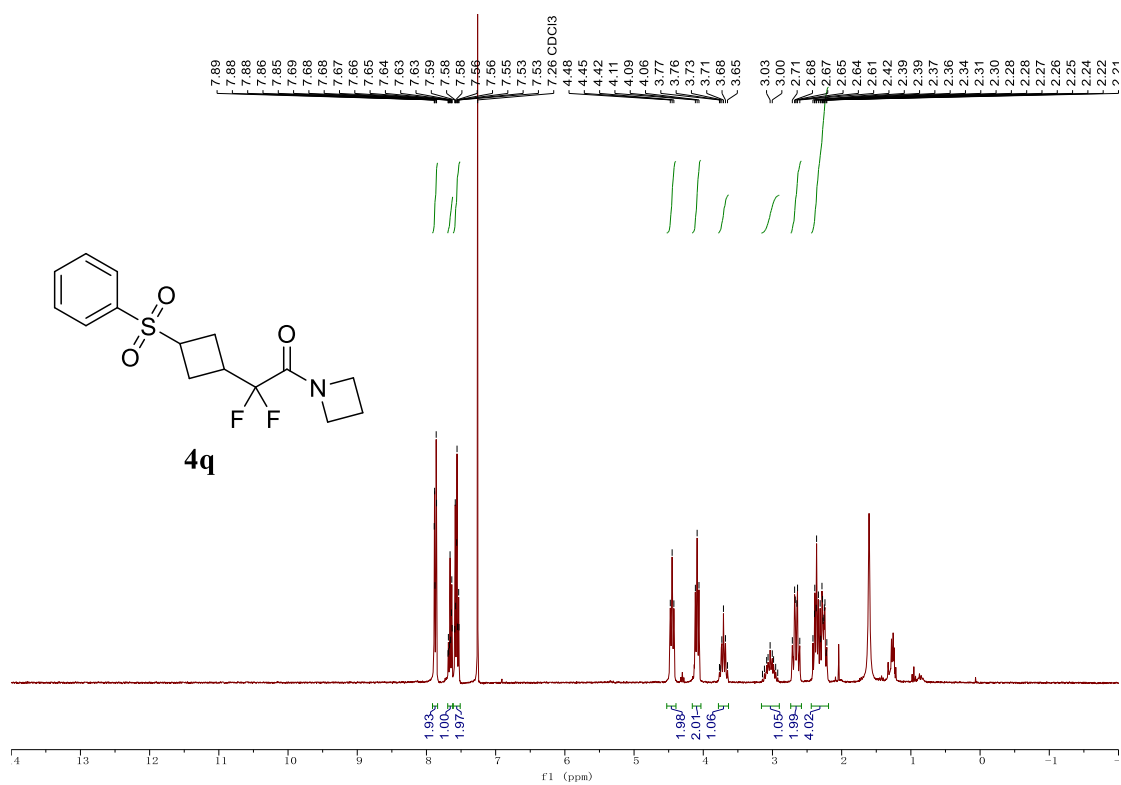

# <sup>13</sup>C NMR Spectrum of Compound **4q** (101 MHz, CDCl<sub>3</sub>)

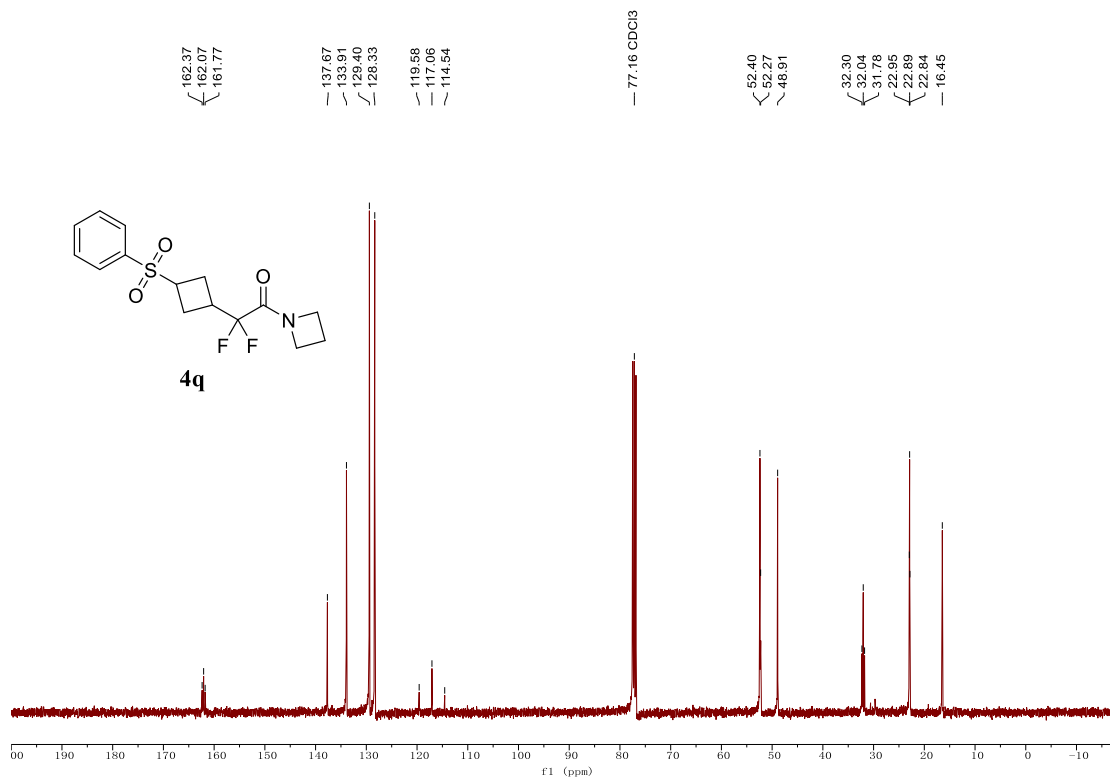

<sup>19</sup>F NMR Spectrum of Compound **4q** (282 MHz, CDCl<sub>3</sub>)

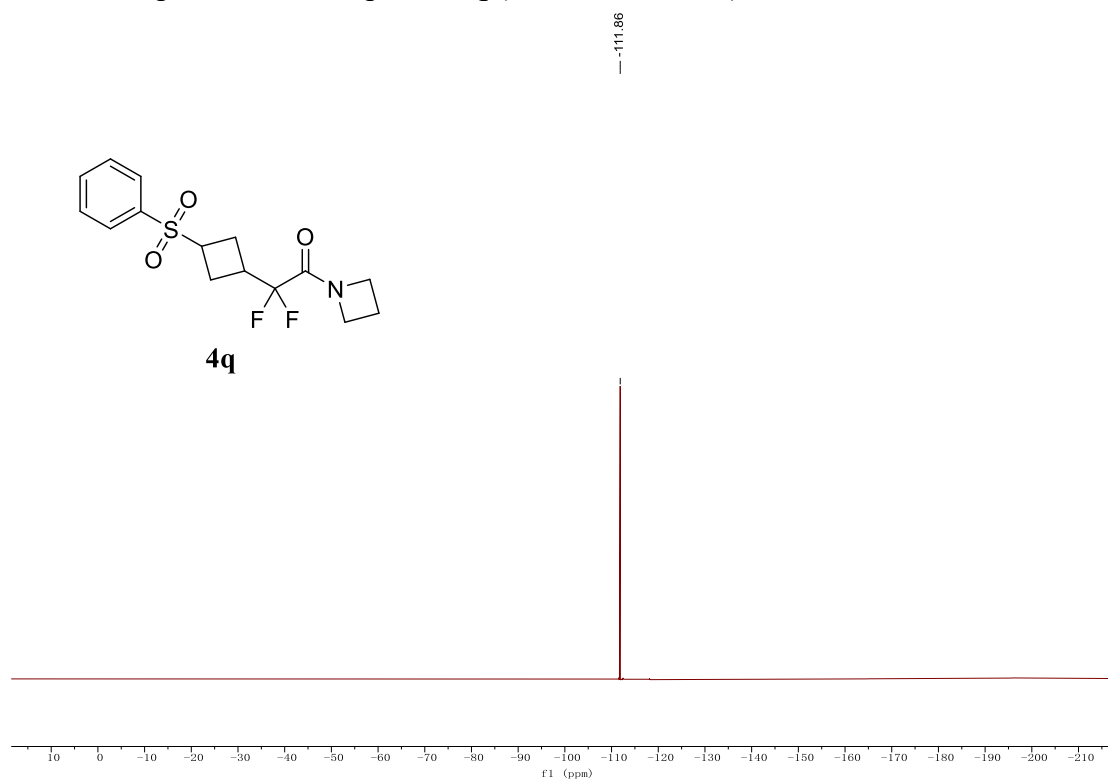

<sup>1</sup>H NMR Spectrum of Compound **4r** (300 MHz, CDCl<sub>3</sub>)

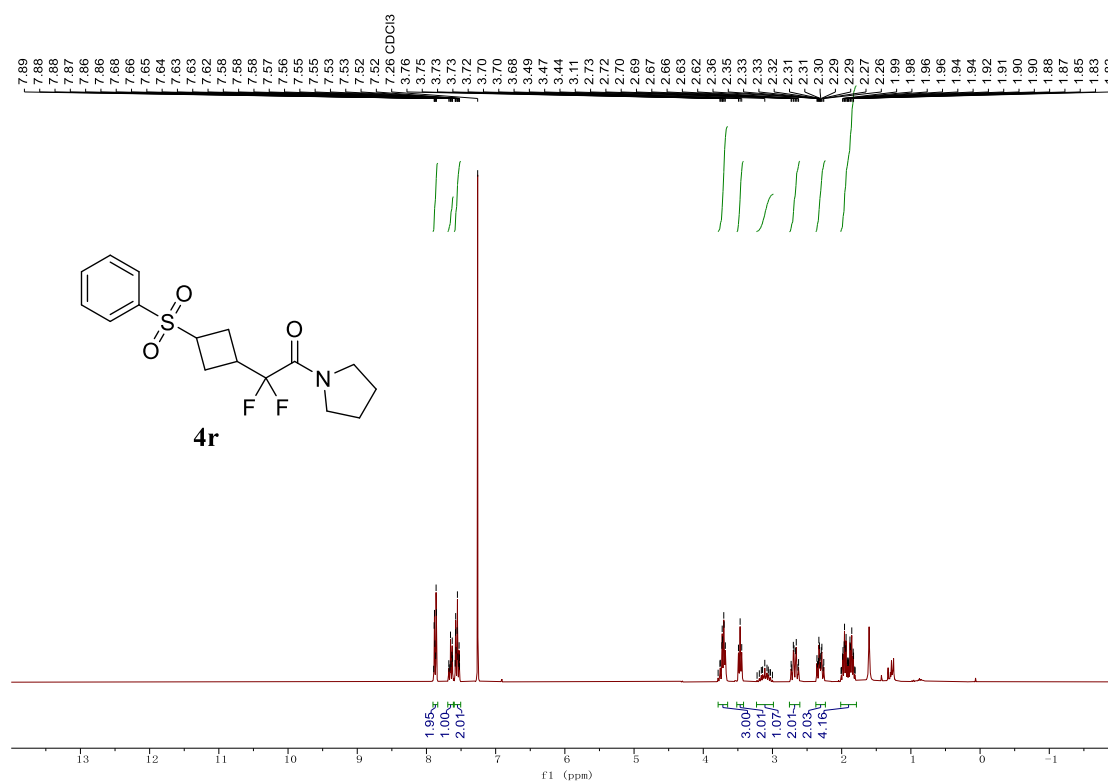

<sup>13</sup>C NMR Spectrum of Compound **4r** (101 MHz, CDCl<sub>3</sub>)

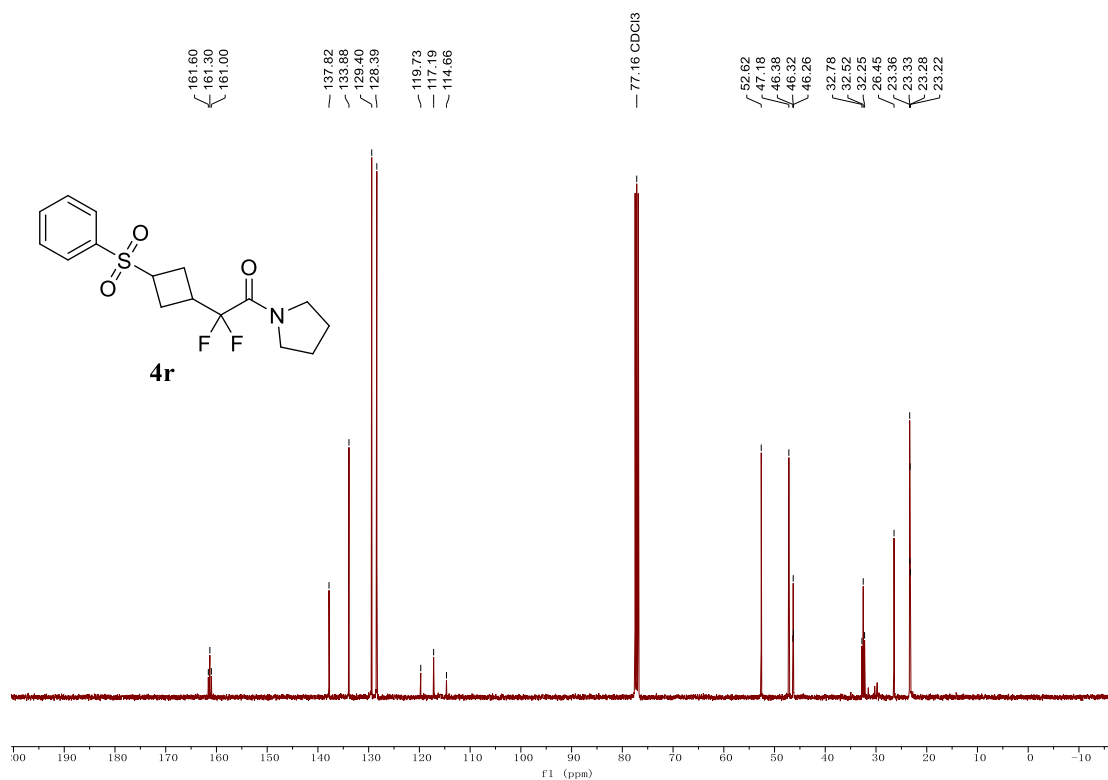

<sup>19</sup>F NMR Spectrum of Compound **4r** (282 MHz, CDCl<sub>3</sub>)

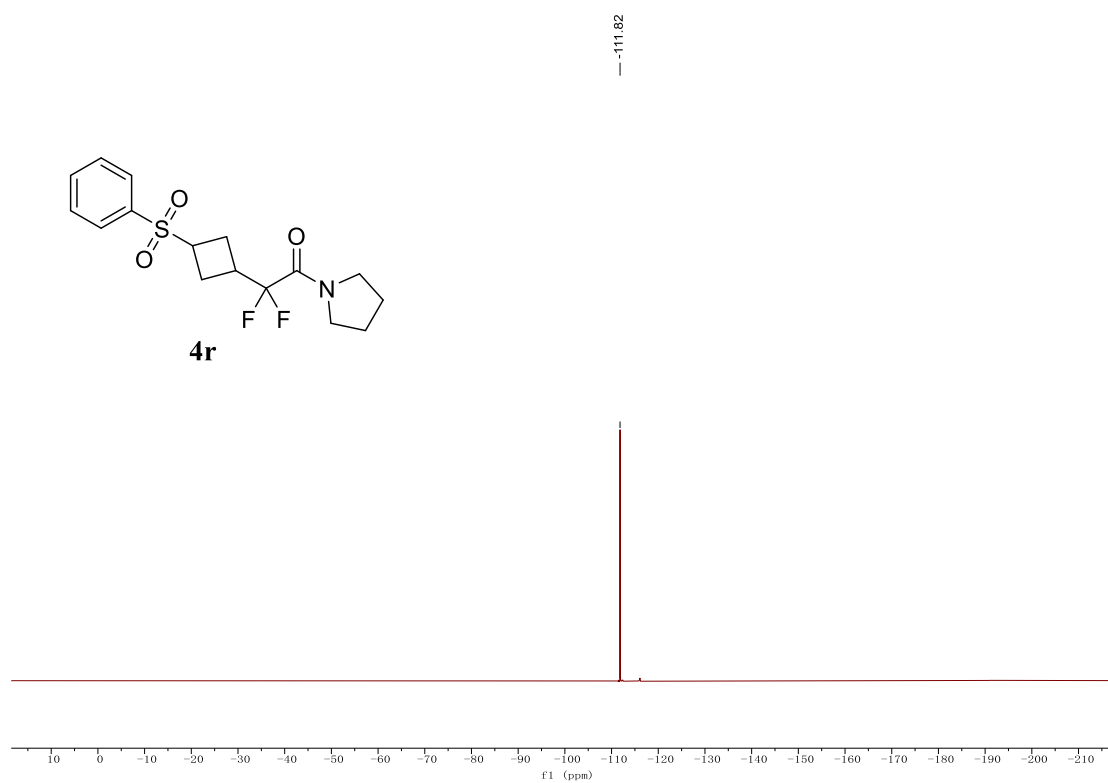

# <sup>1</sup>H NMR Spectrum of Compound 4s (300 MHz, CDCl<sub>3</sub>)

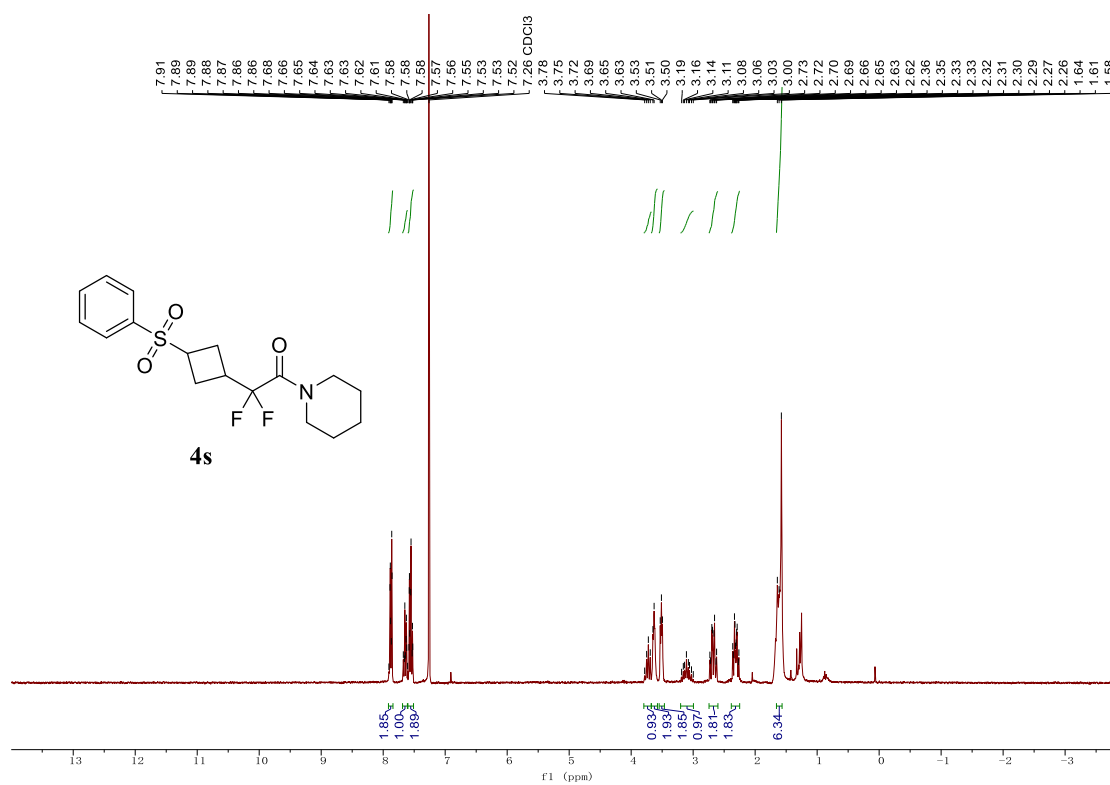

# <sup>13</sup>C NMR Spectrum of Compound 4s (75 MHz, CDCl<sub>3</sub>)

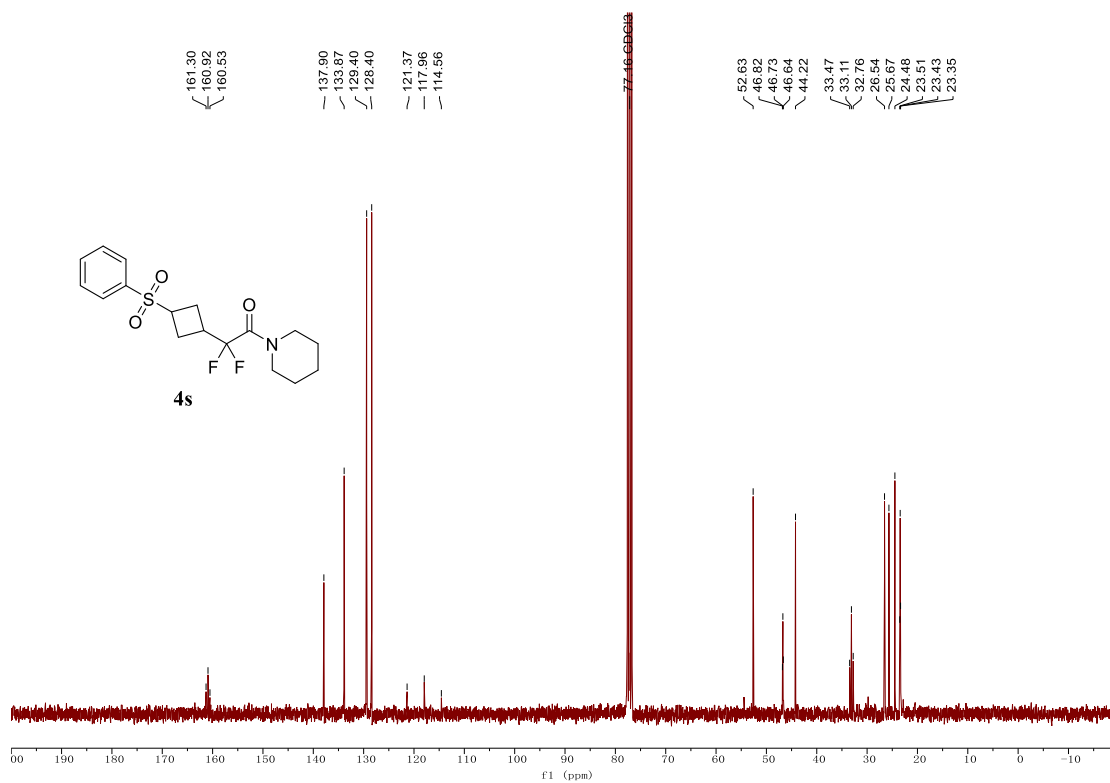

# <sup>19</sup>F NMR Spectrum of Compound **4s** (282 MHz, CDCl<sub>3</sub>)

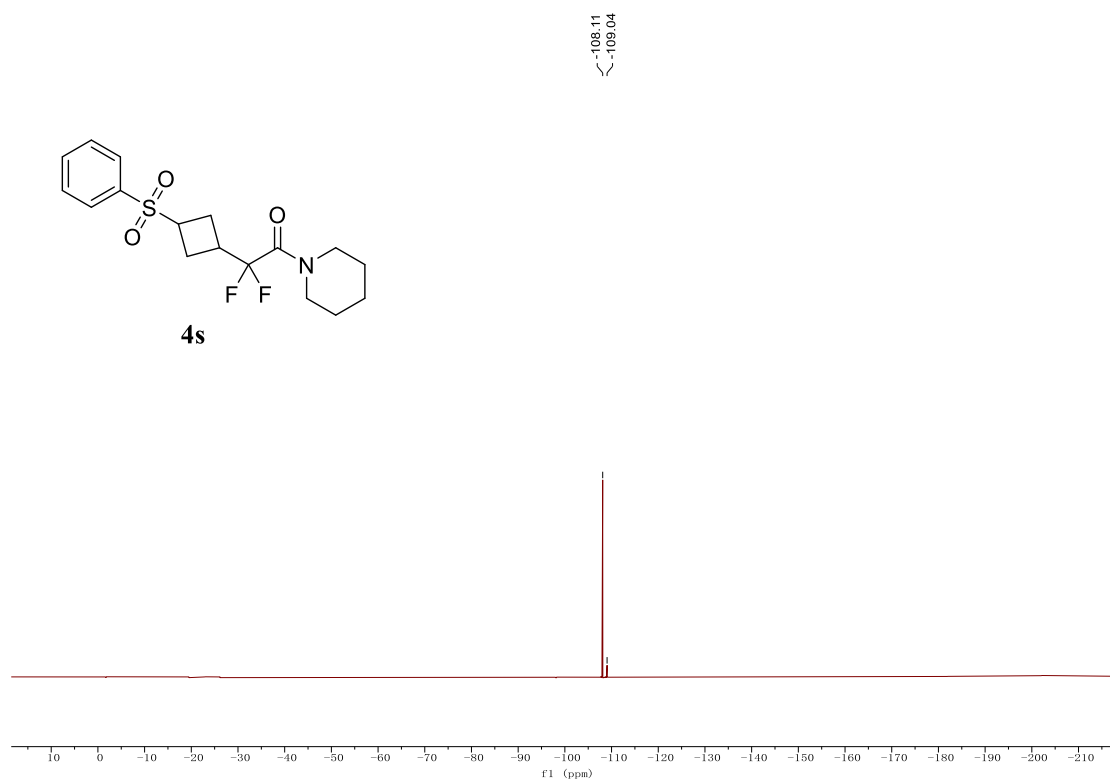

# <sup>1</sup>H NMR Spectrum of Compound **4t** (400 MHz, CDCl<sub>3</sub>)

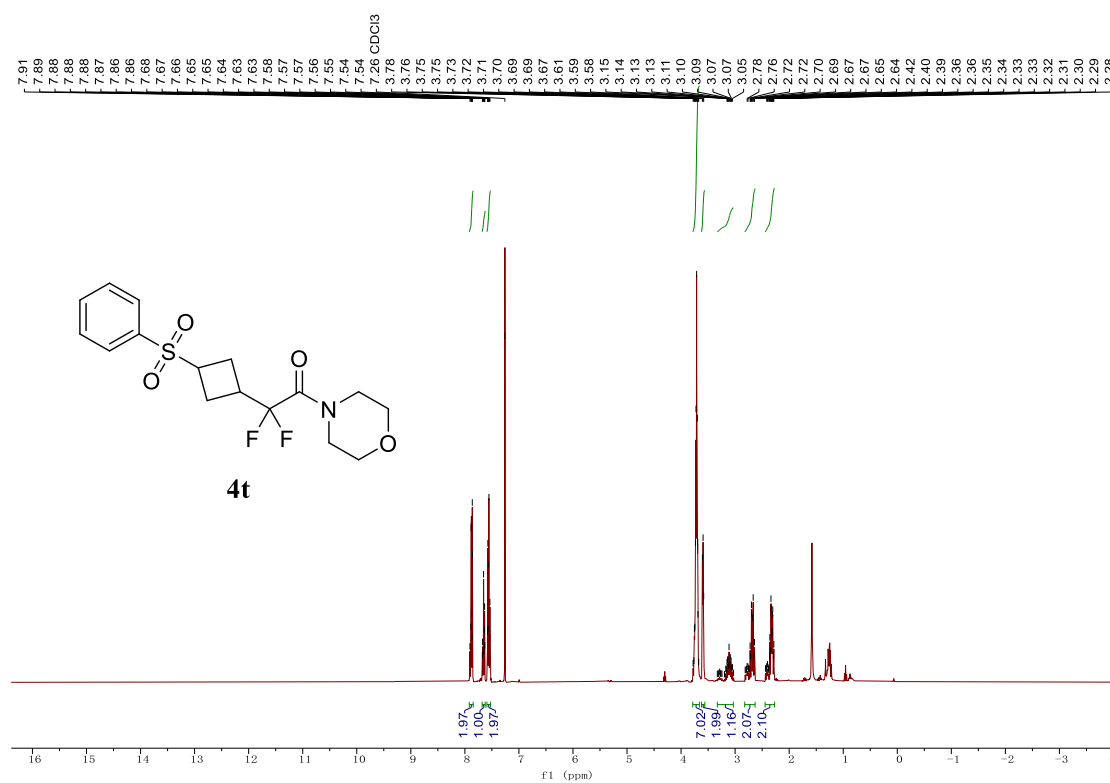



<sup>13</sup>C NMR Spectrum of Compound **4t** (75 MHz, CDCl<sub>3</sub>)

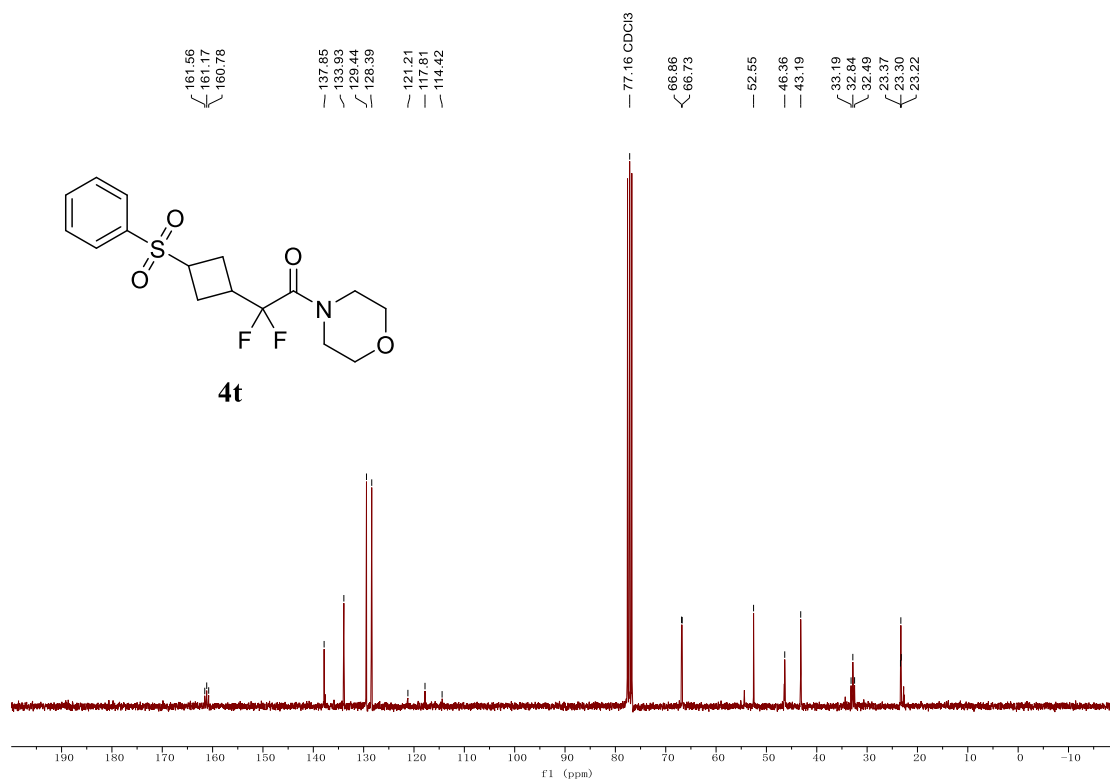

<sup>19</sup>F NMR Spectrum of Compound **4t** (282 MHz, CDCl<sub>3</sub>)

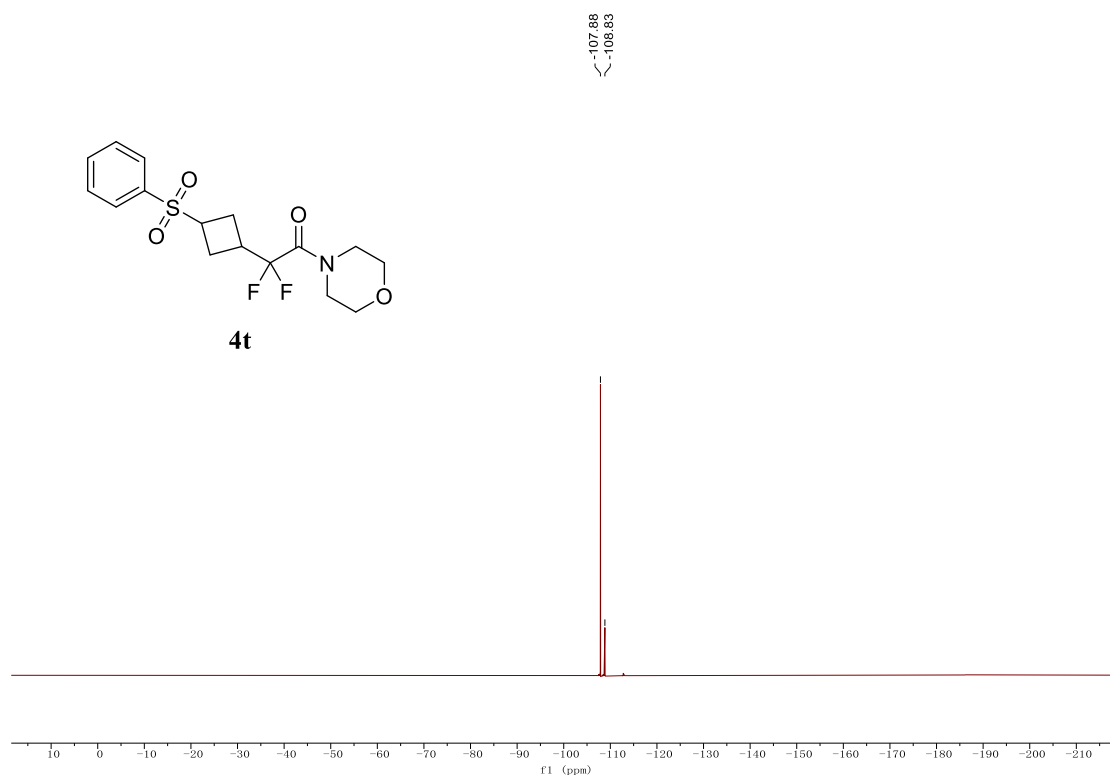

<sup>1</sup>H NMR Spectrum of Compound **4u** (300 MHz, CDCl<sub>3</sub>)

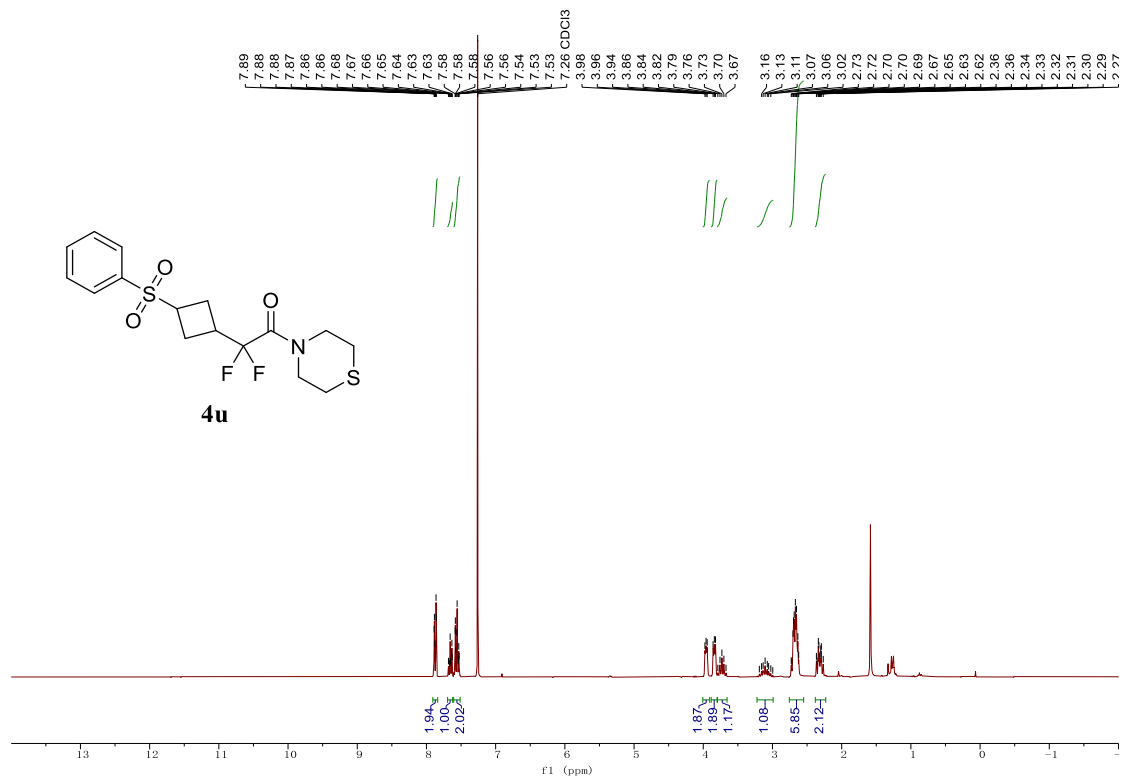

<sup>13</sup>C NMR Spectrum of Compound **4u** (101 MHz, CDCl<sub>3</sub>)

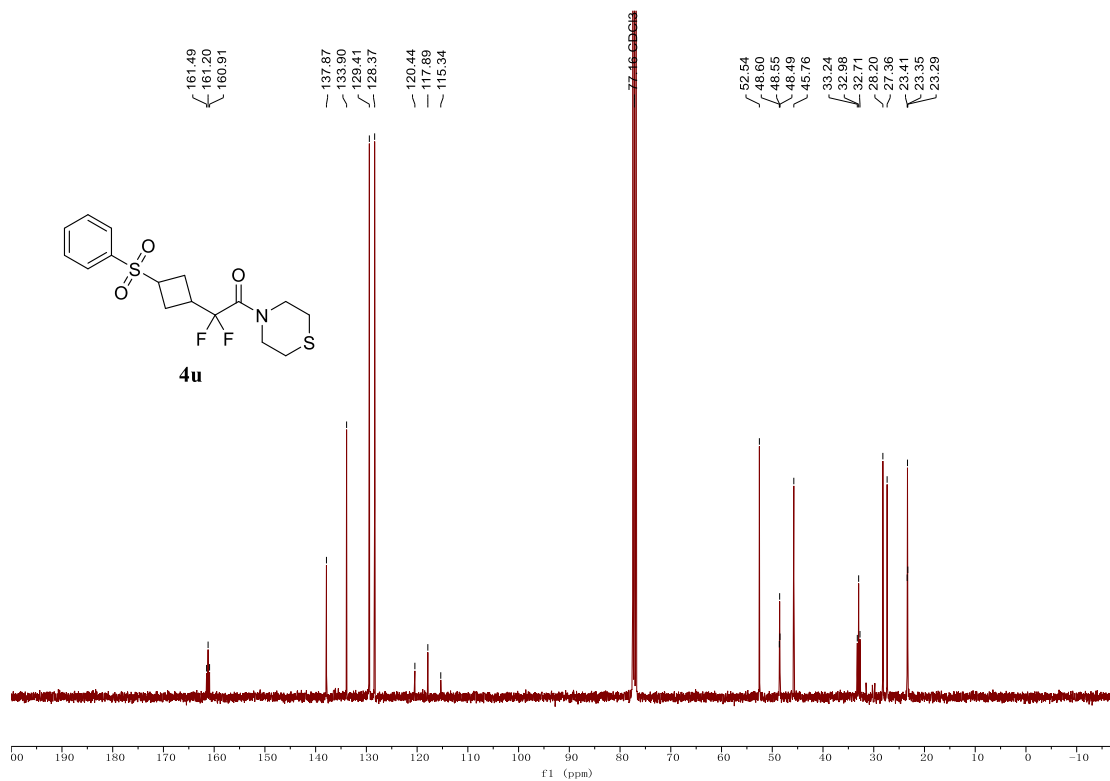

<sup>19</sup>F NMR Spectrum of Compound **4u** (282 MHz, CDCl<sub>3</sub>)

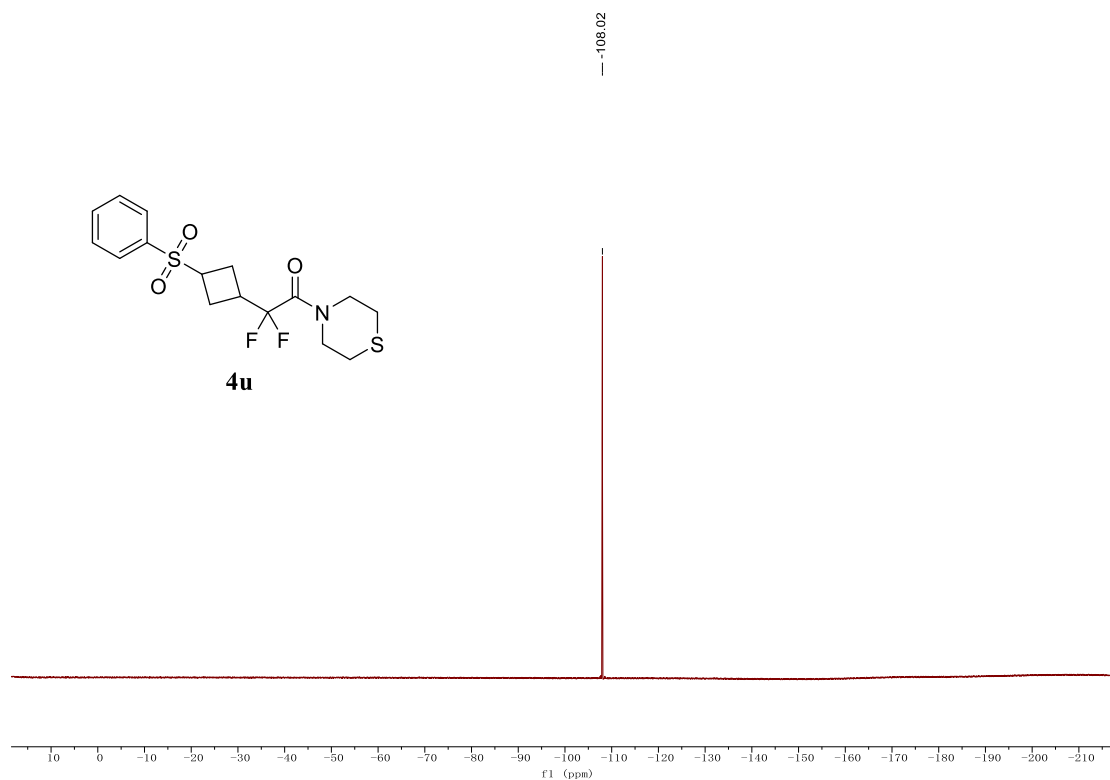

<sup>1</sup>H NMR Spectrum of Compound **4v** (300 MHz, CDCl<sub>3</sub>)

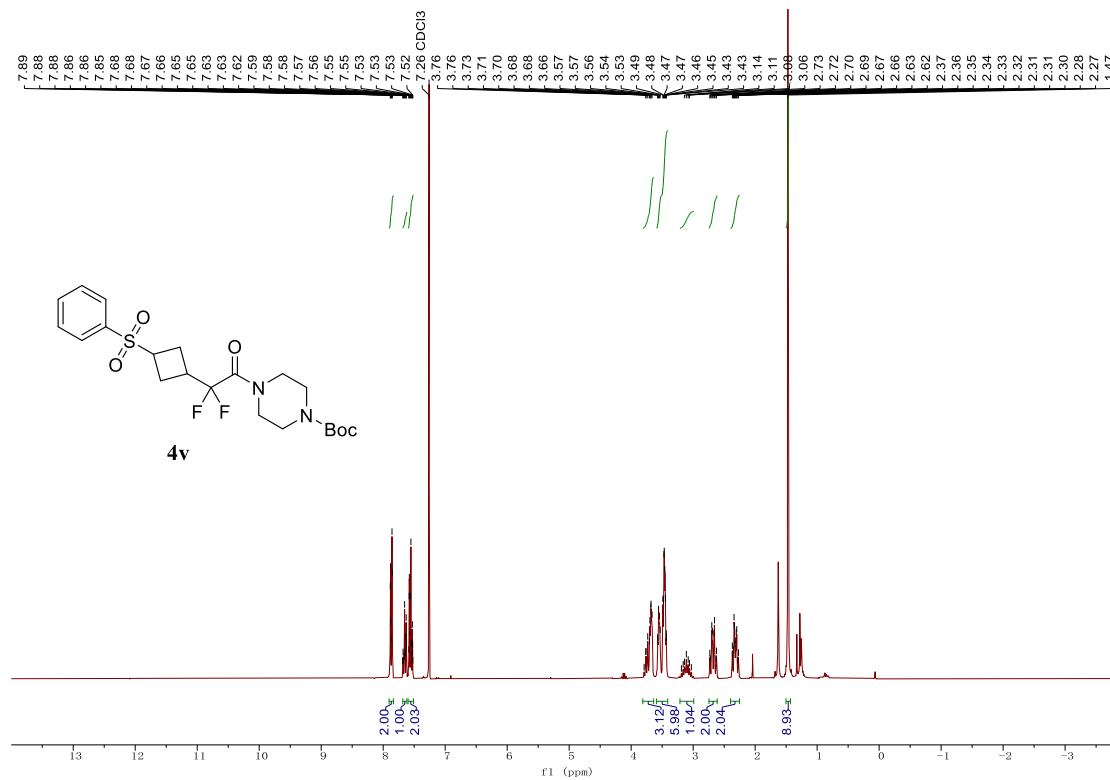

### <sup>13</sup>C NMR Spectrum of Compound **4v** (75 MHz, CDCl<sub>3</sub>)

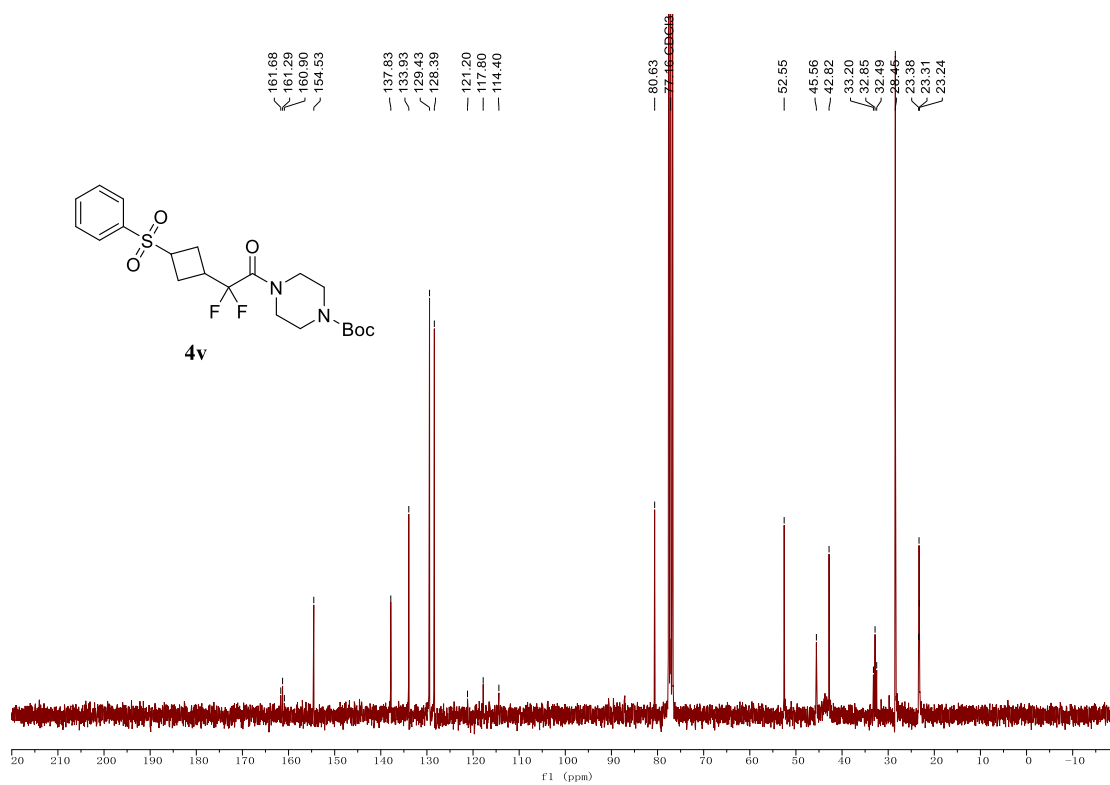

### <sup>19</sup>F NMR Spectrum of Compound **4v** (282 MHz, CDCl<sub>3</sub>)

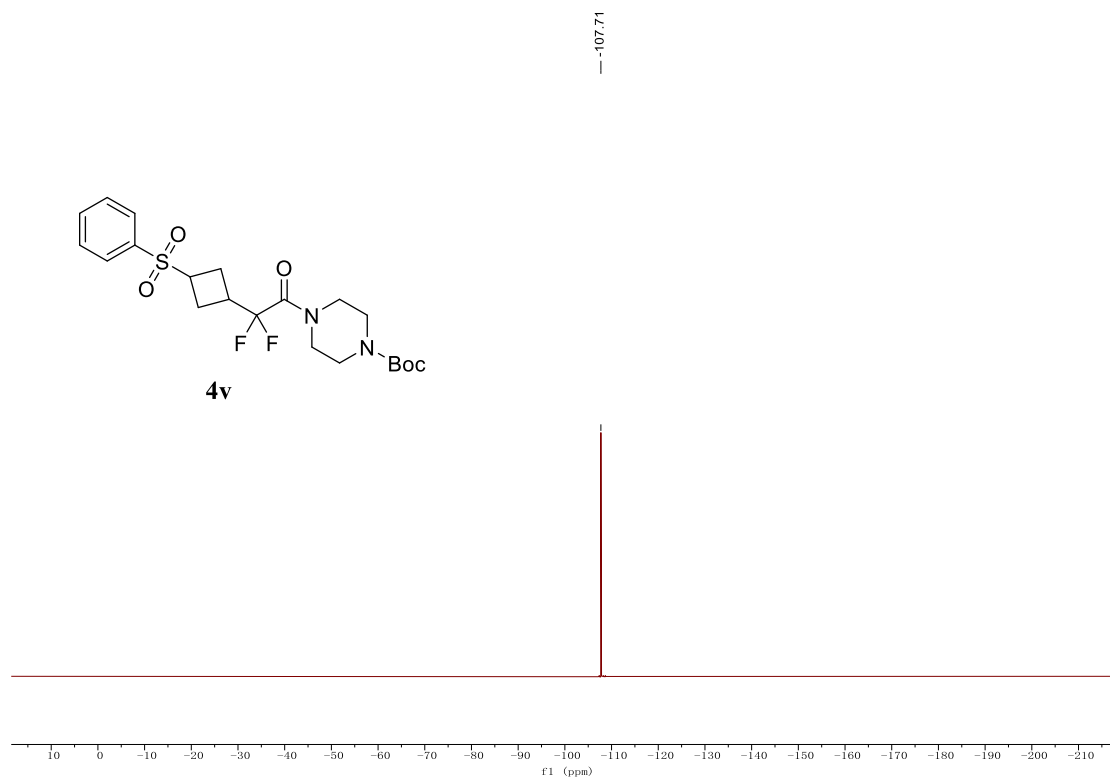

# <sup>1</sup>H NMR Spectrum of Compound 4w (300 MHz, CDCl<sub>3</sub>)

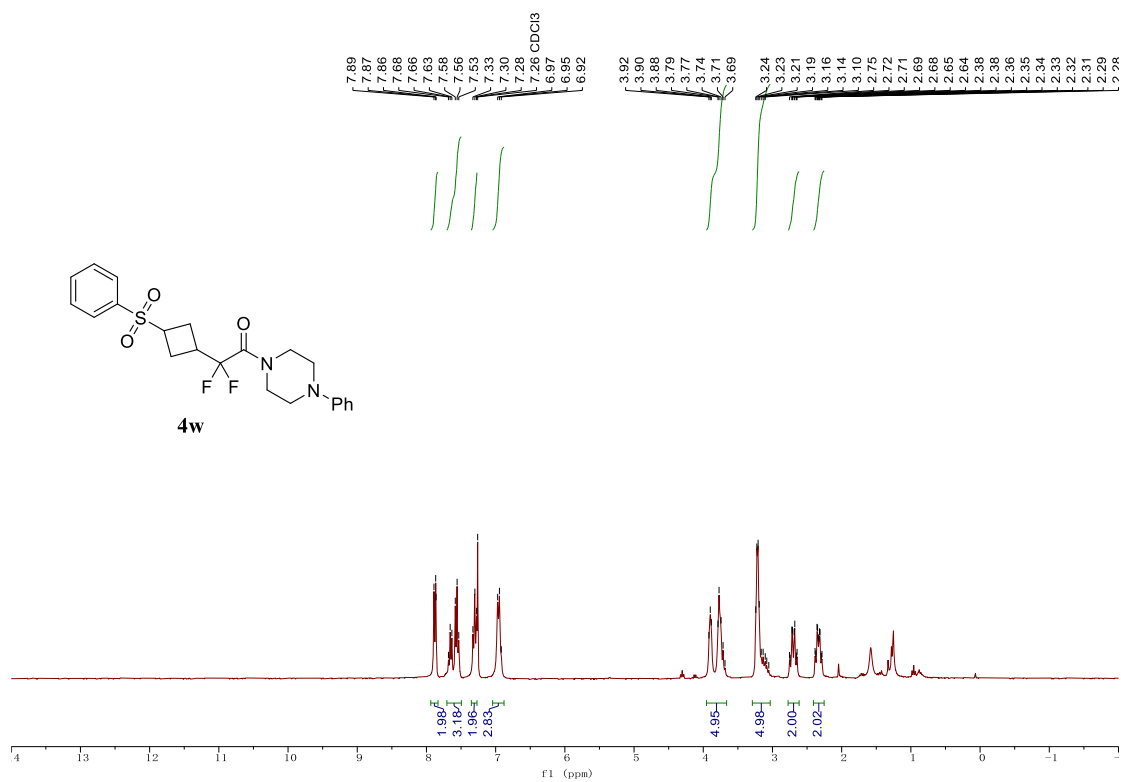

# <sup>13</sup>C NMR Spectrum of Compound 4w (101 MHz, CDCl<sub>3</sub>)

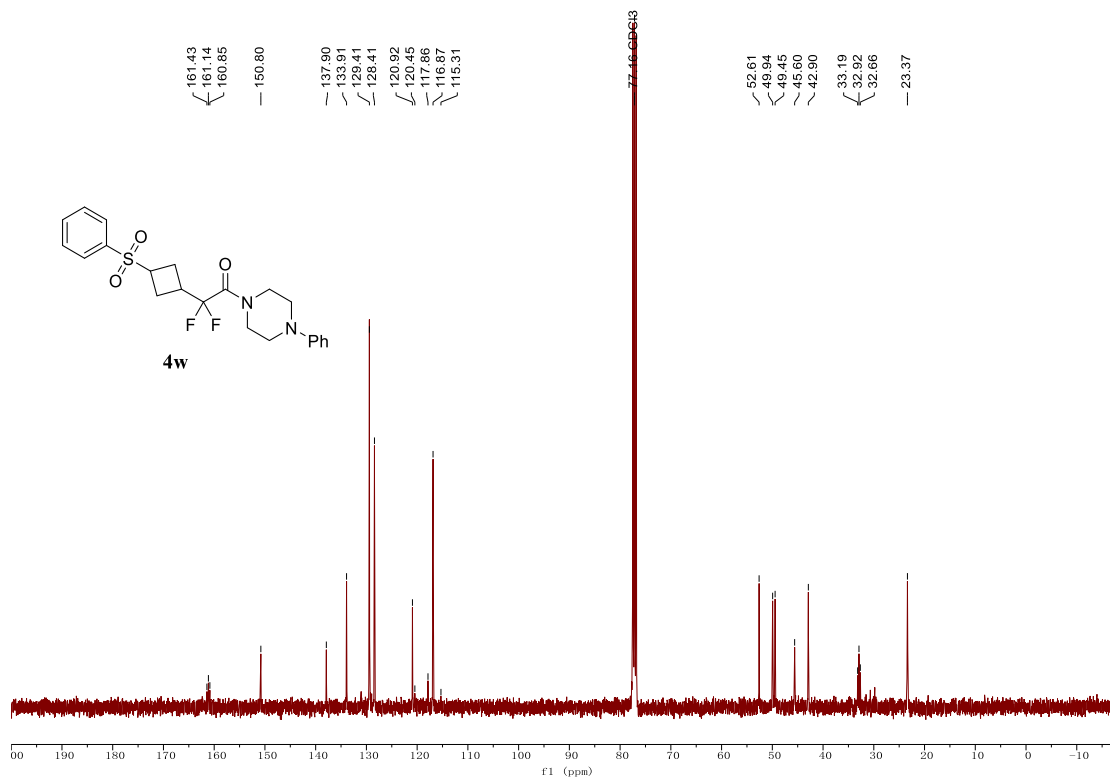

<sup>19</sup>F NMR Spectrum of Compound **4w** (282 MHz, CDCl<sub>3</sub>)

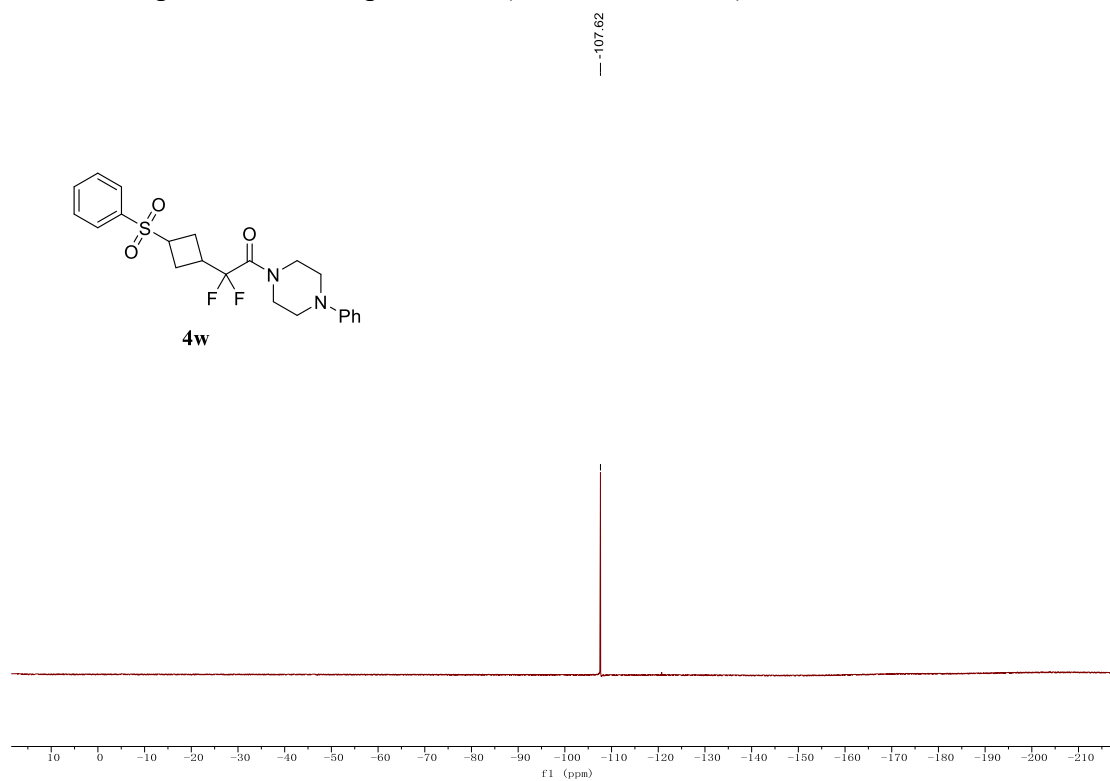

<sup>1</sup>H NMR Spectrum of Compound **4x** (300 MHz, CDCl<sub>3</sub>)

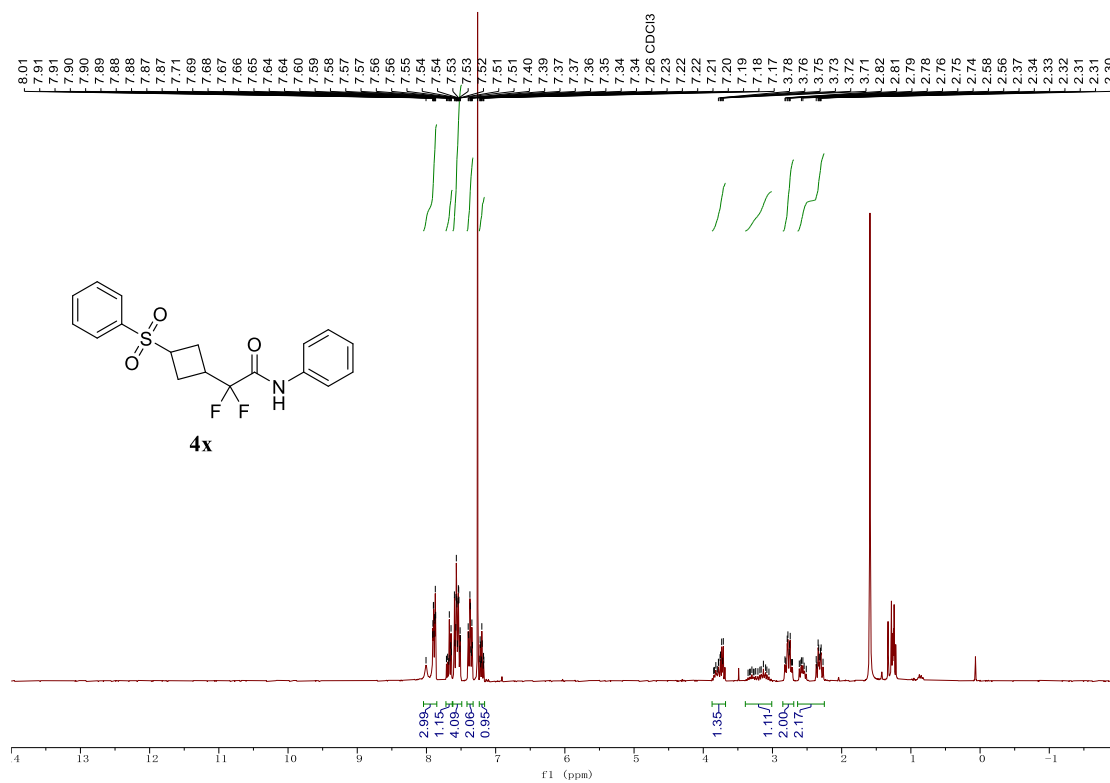

<sup>13</sup>C NMR Spectrum of Compound **4x** (101 MHz, Acetone-*d*<sub>6</sub>)

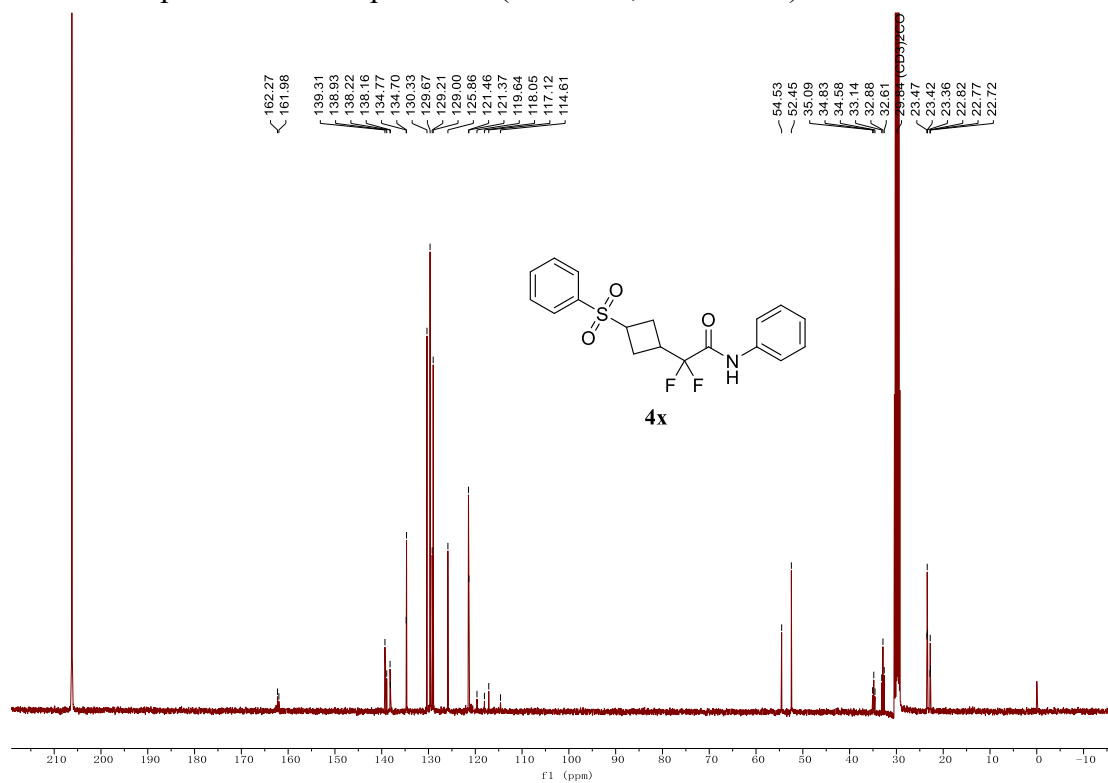

<sup>19</sup>F NMR Spectrum of Compound **4x** (282 MHz, CDCl<sub>3</sub>)

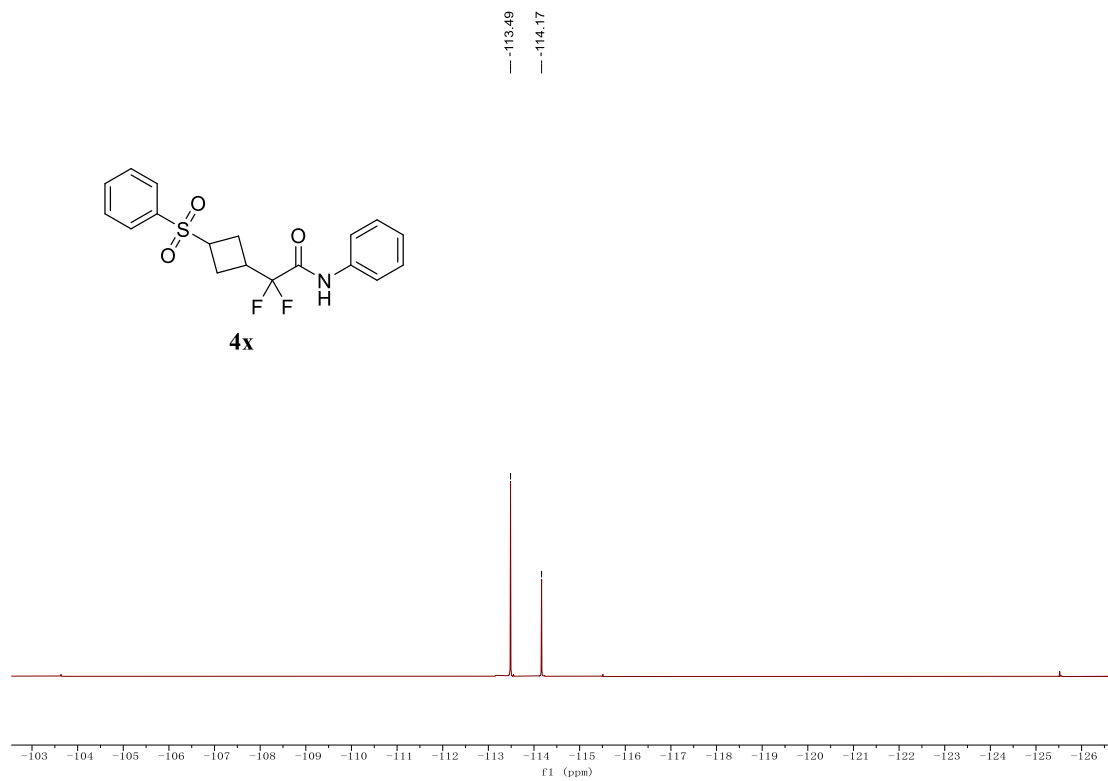

# <sup>1</sup>H NMR Spectrum of Compound 4y (300 MHz, CDCl<sub>3</sub>)

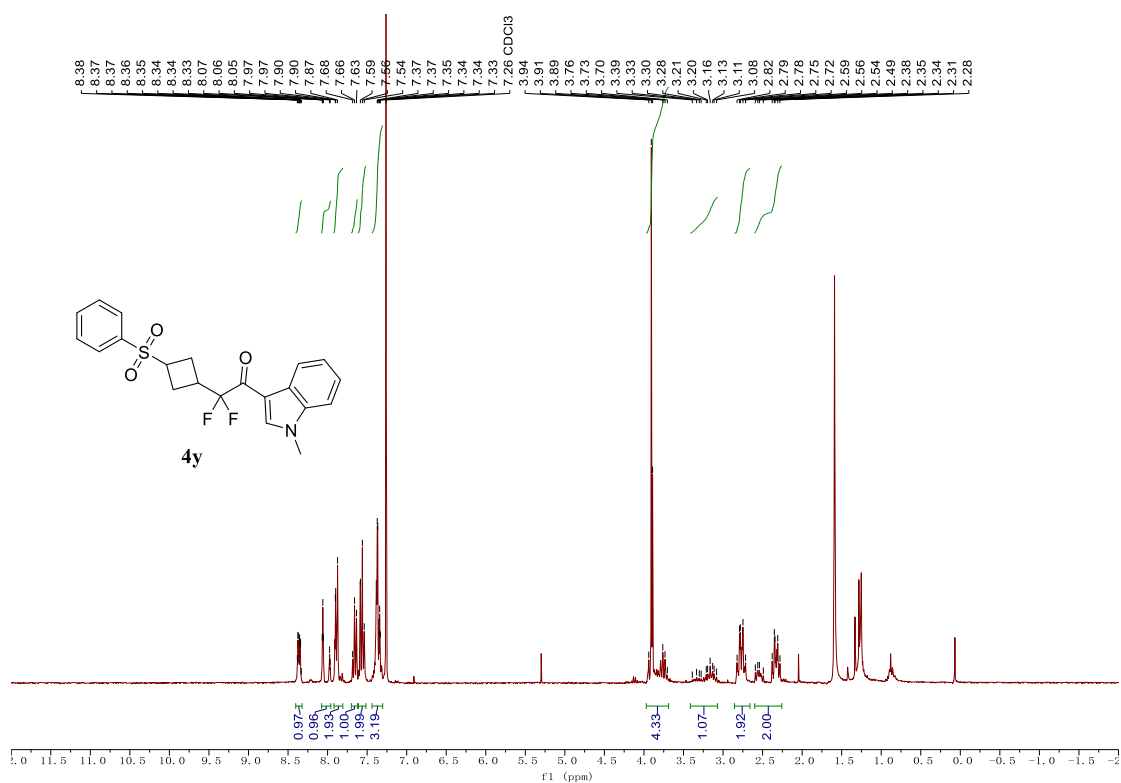

# <sup>13</sup>C NMR Spectrum of Compound 4y (101 MHz, CDCl<sub>3</sub>)

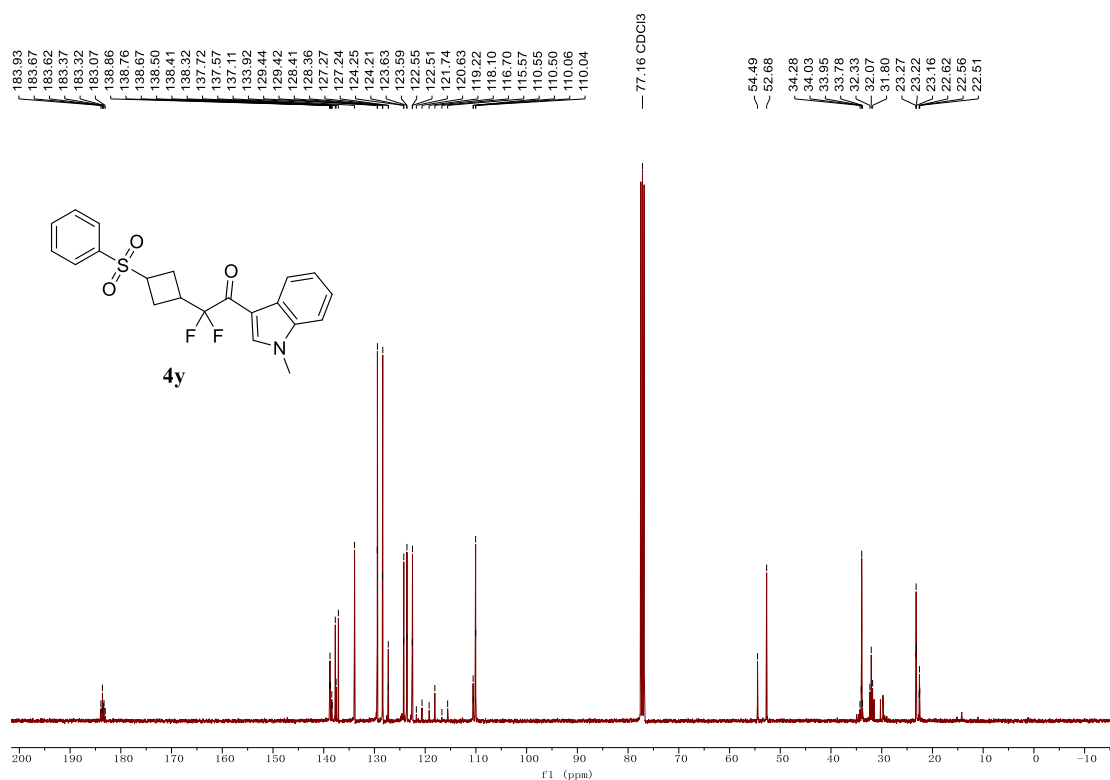



<sup>19</sup>F NMR Spectrum of Compound **4y** (282 MHz, CDCl<sub>3</sub>)

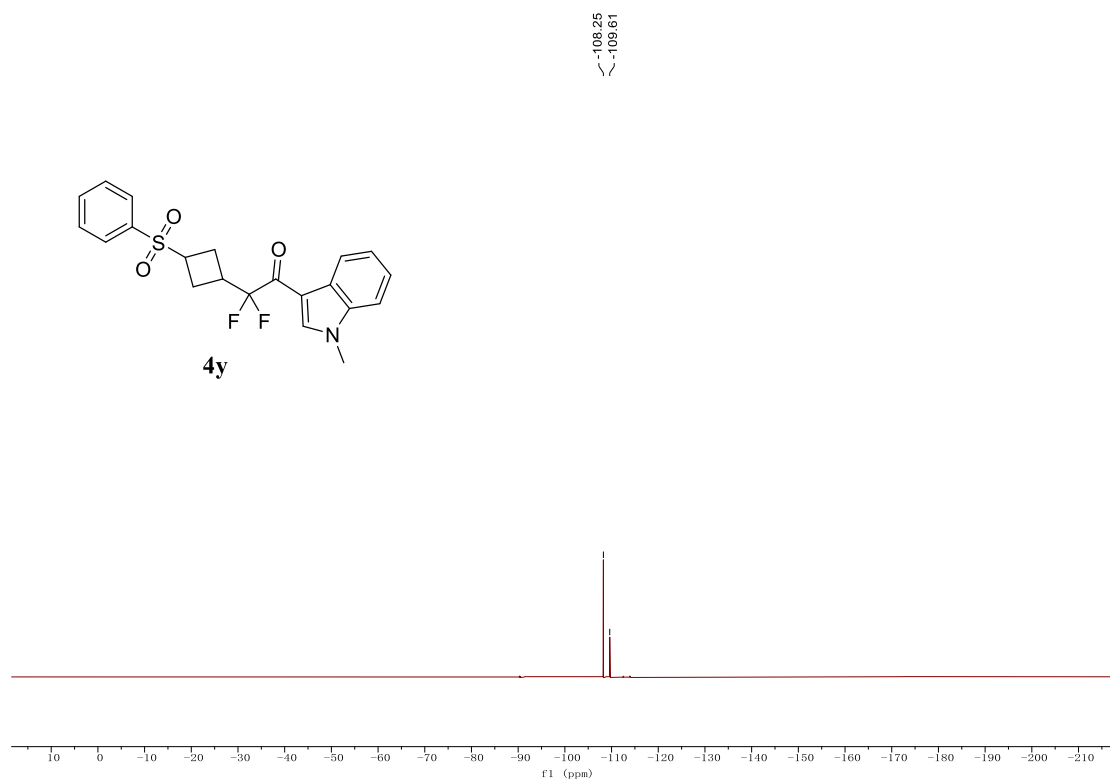

<sup>1</sup>H NMR Spectrum of Compound **4z** (300 MHz, CDCl<sub>3</sub>)

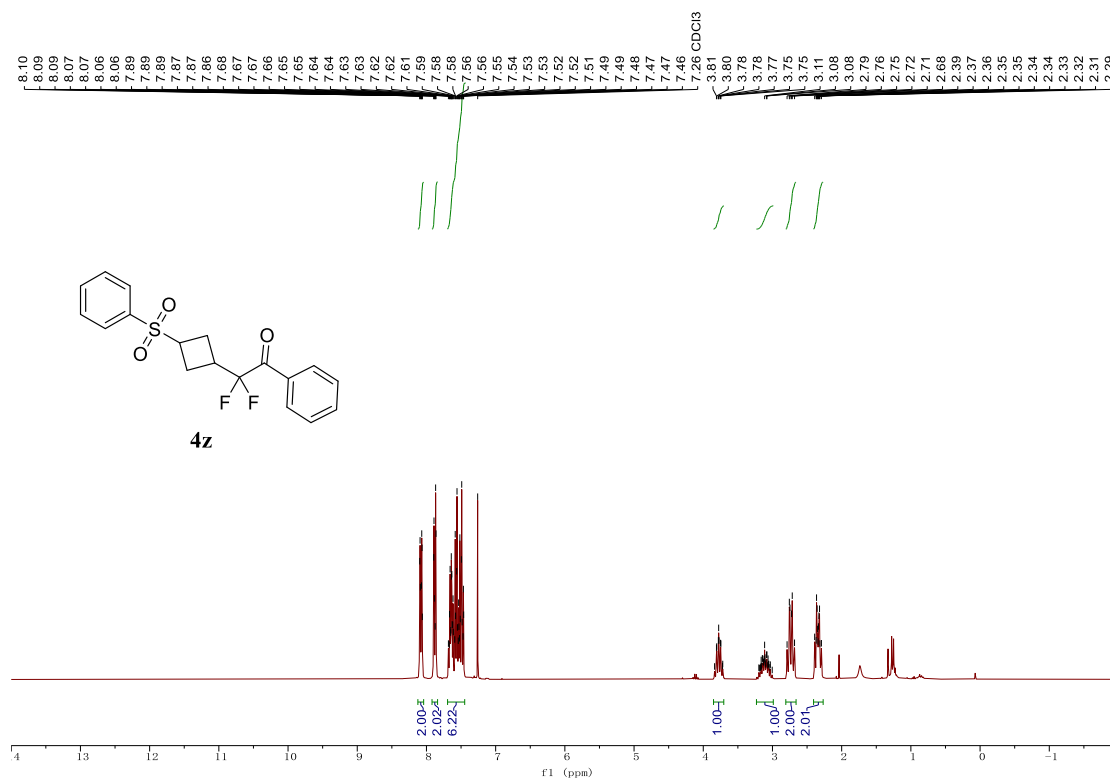

### $^{13}\text{C}$ NMR Spectrum of Compound **4z** (75 MHz, $\text{CDCl}_3$ )

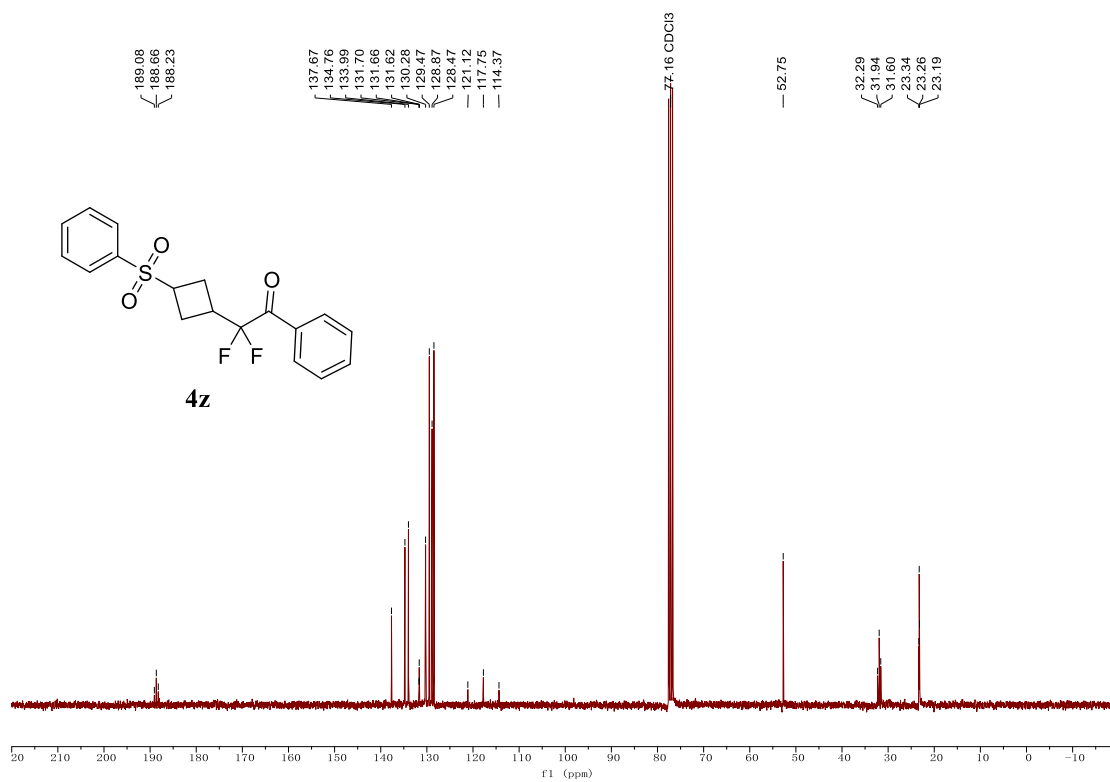

### $^{19}\text{F}$ NMR Spectrum of Compound **4z** (282 MHz, $\text{CDCl}_3$ )

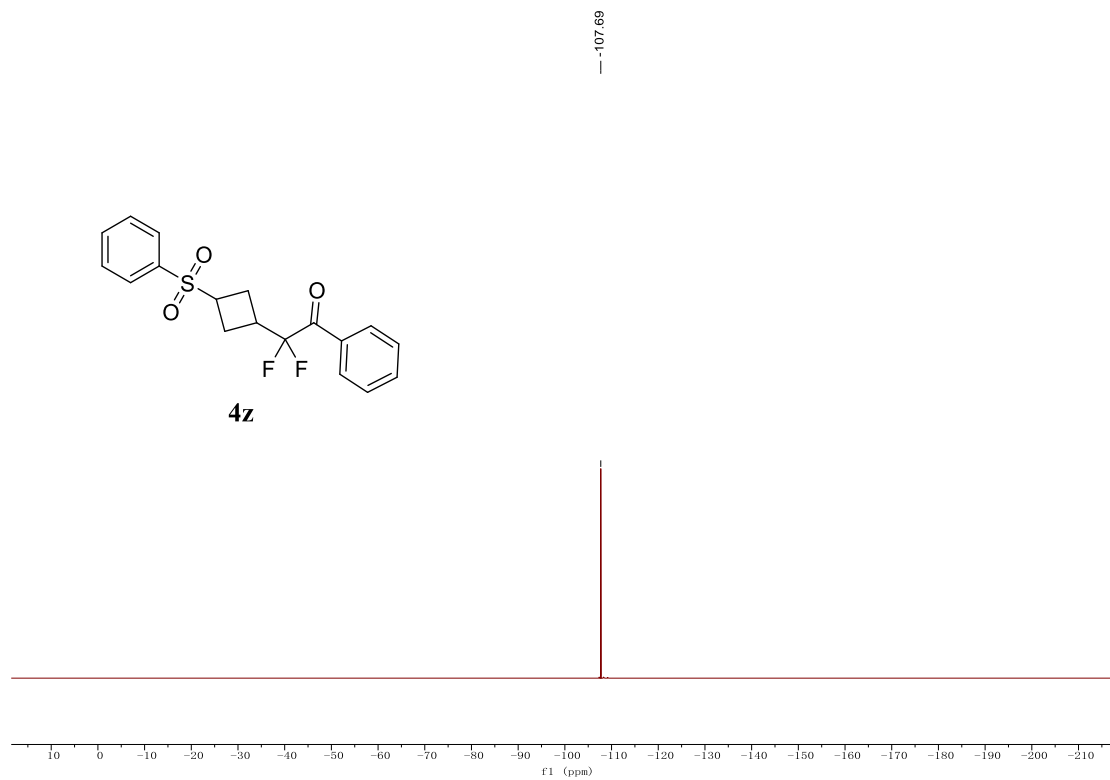

# <sup>1</sup>H NMR Spectrum of Compound **4aa** (300 MHz, CDCl<sub>3</sub>)

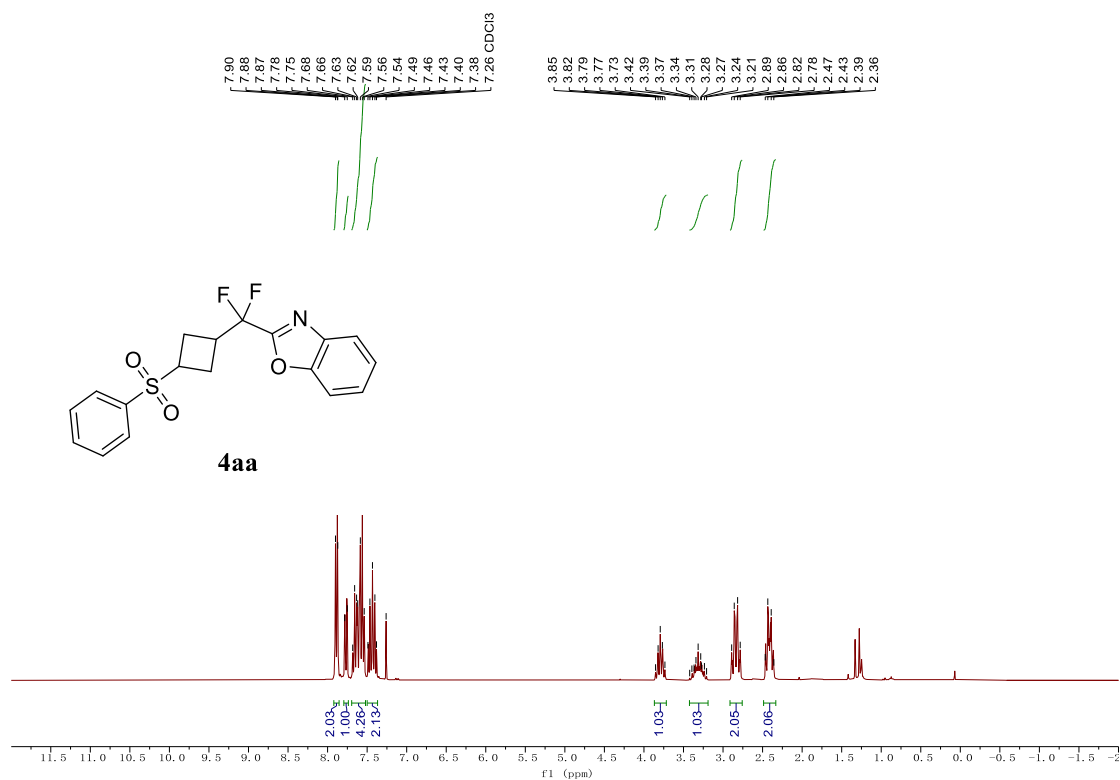

# <sup>13</sup>C NMR Spectrum of Compound **4aa** (101 MHz, CDCl<sub>3</sub>)

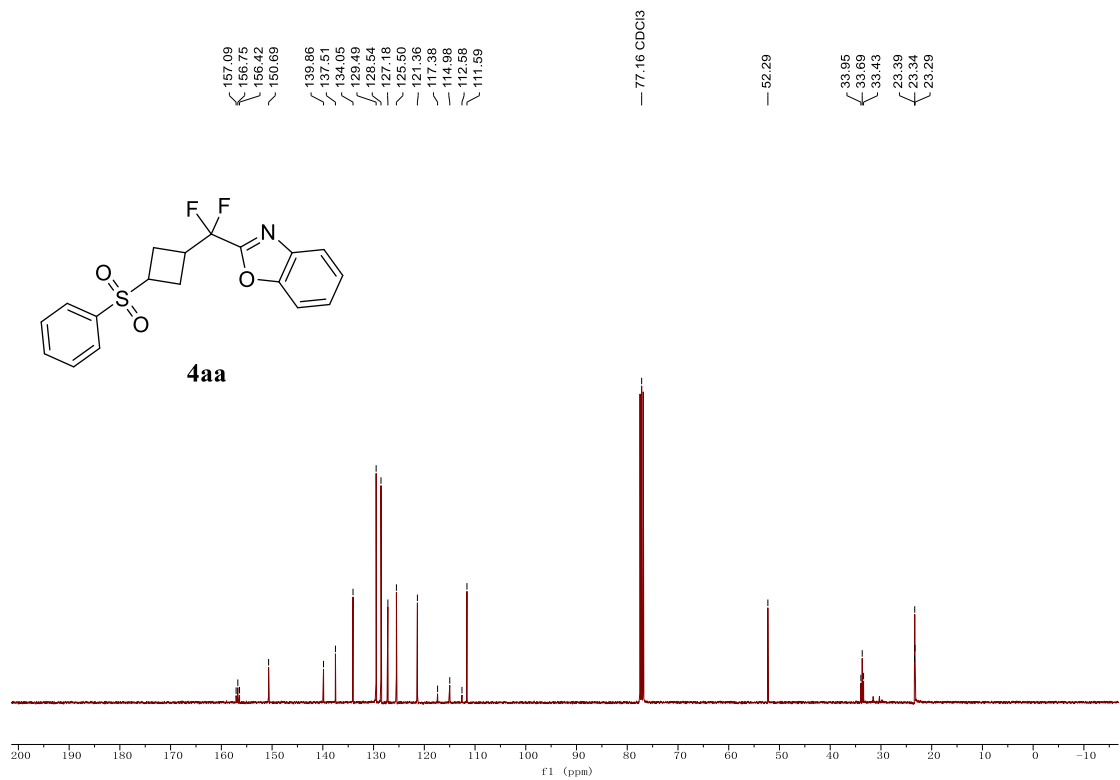

<sup>19</sup>F NMR Spectrum of Compound **4aa** (282 MHz, CDCl<sub>3</sub>)

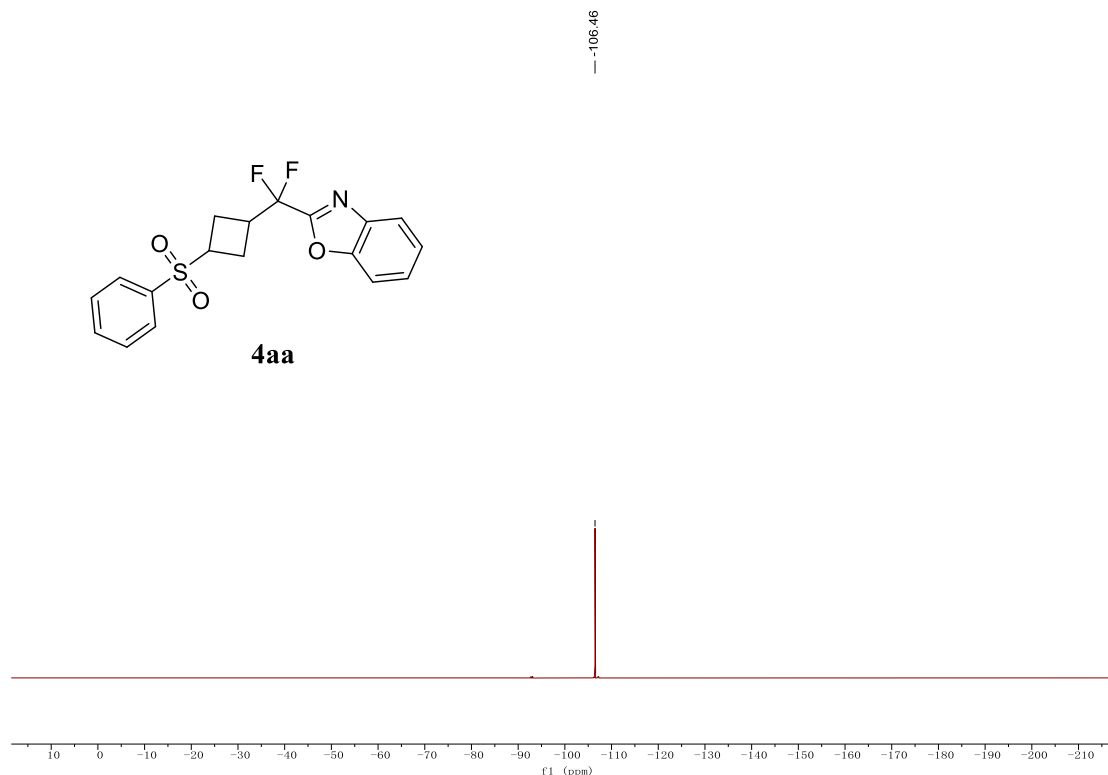

<sup>1</sup>H NMR Spectrum of Compound **4ab** (300 MHz, CDCl<sub>3</sub>)

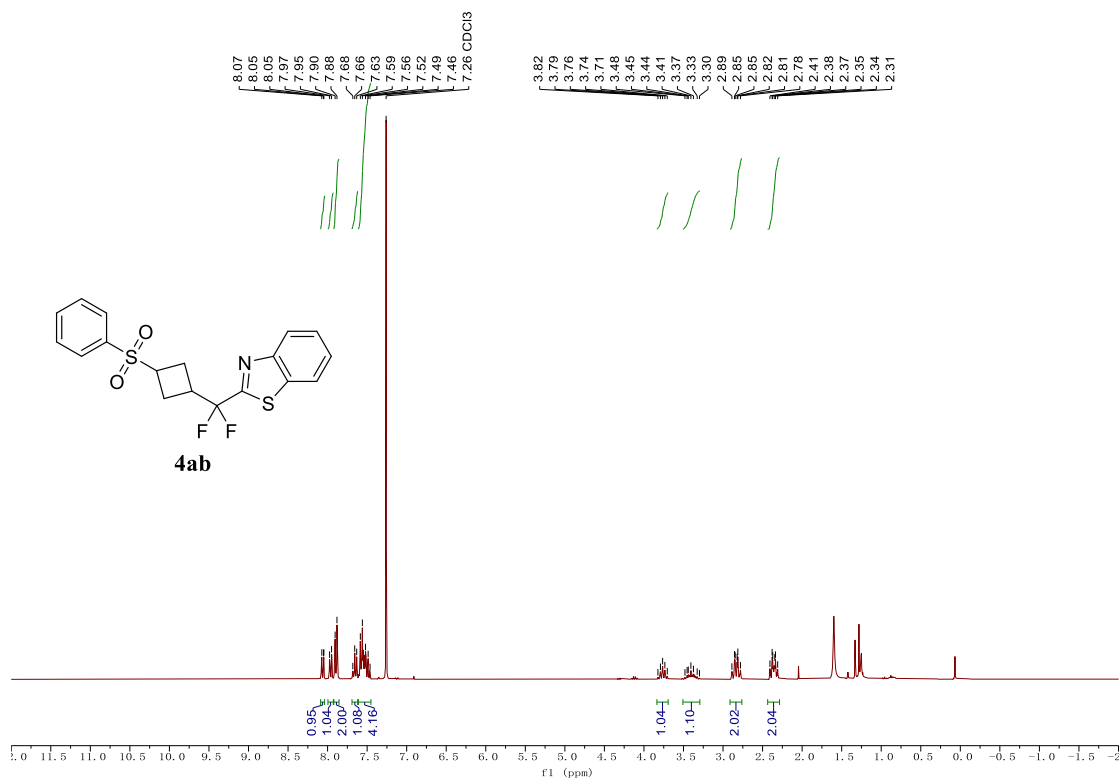

<sup>13</sup>C NMR Spectrum of Compound **4ab** (75 MHz, CDCl<sub>3</sub>)

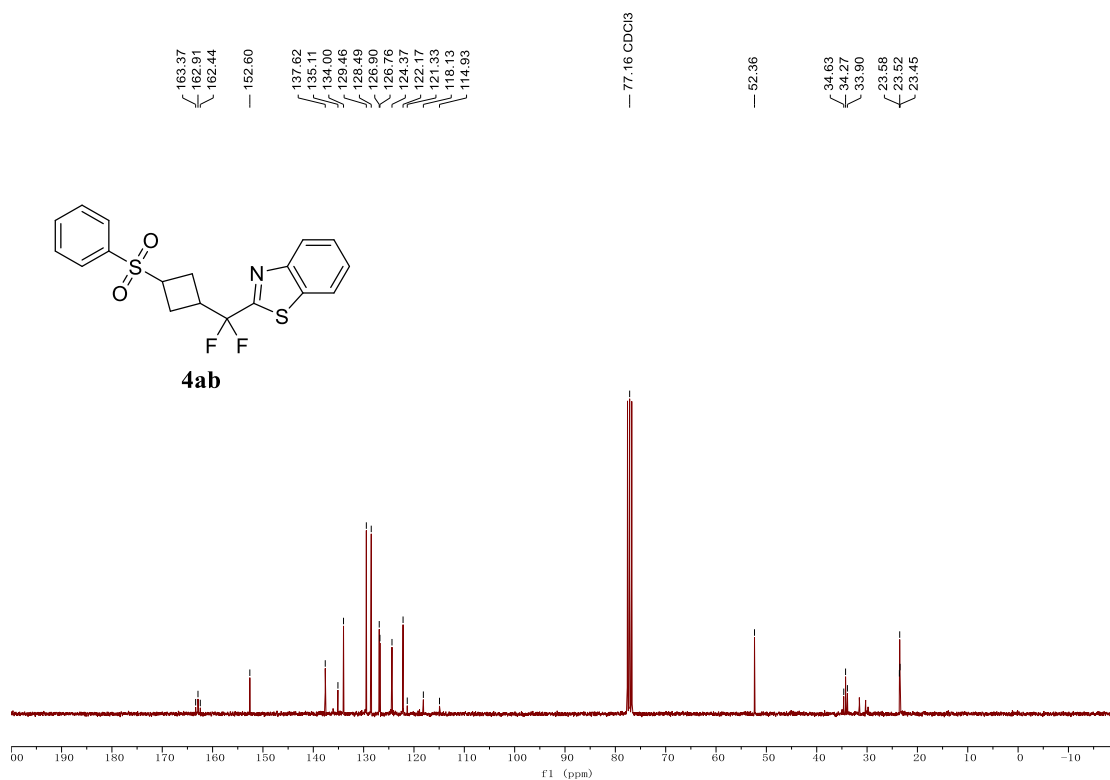

<sup>19</sup>F NMR Spectrum of Compound **4ab** (282 MHz, CDCl<sub>3</sub>)

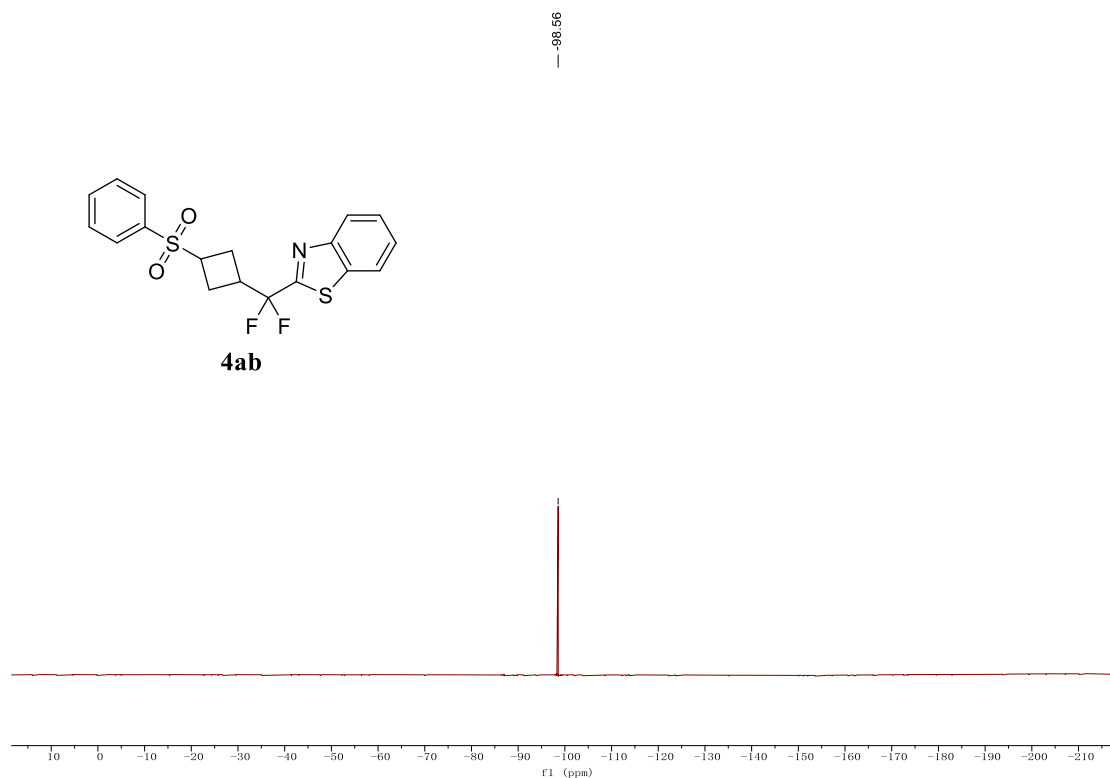

# <sup>1</sup>H NMR Spectrum of Compound **4ac** (300 MHz, CDCl<sub>3</sub>)

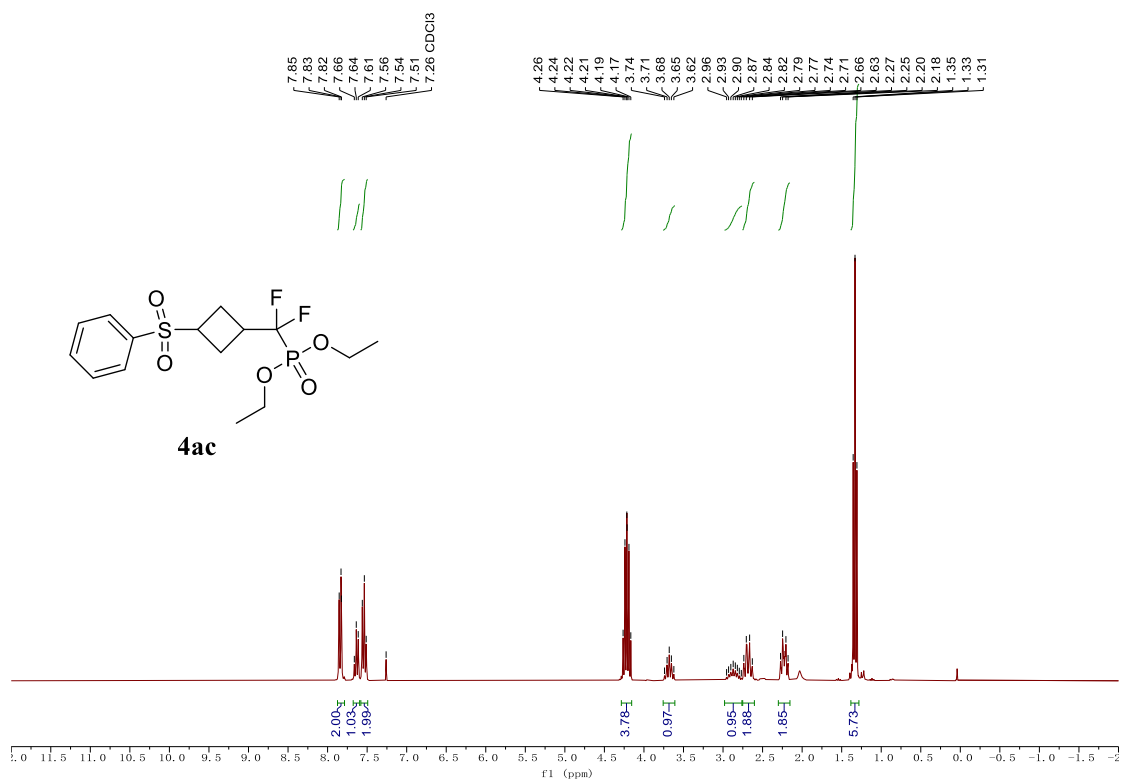

# <sup>13</sup>C NMR Spectrum of Compound **4ac** (101 MHz, CDCl<sub>3</sub>)

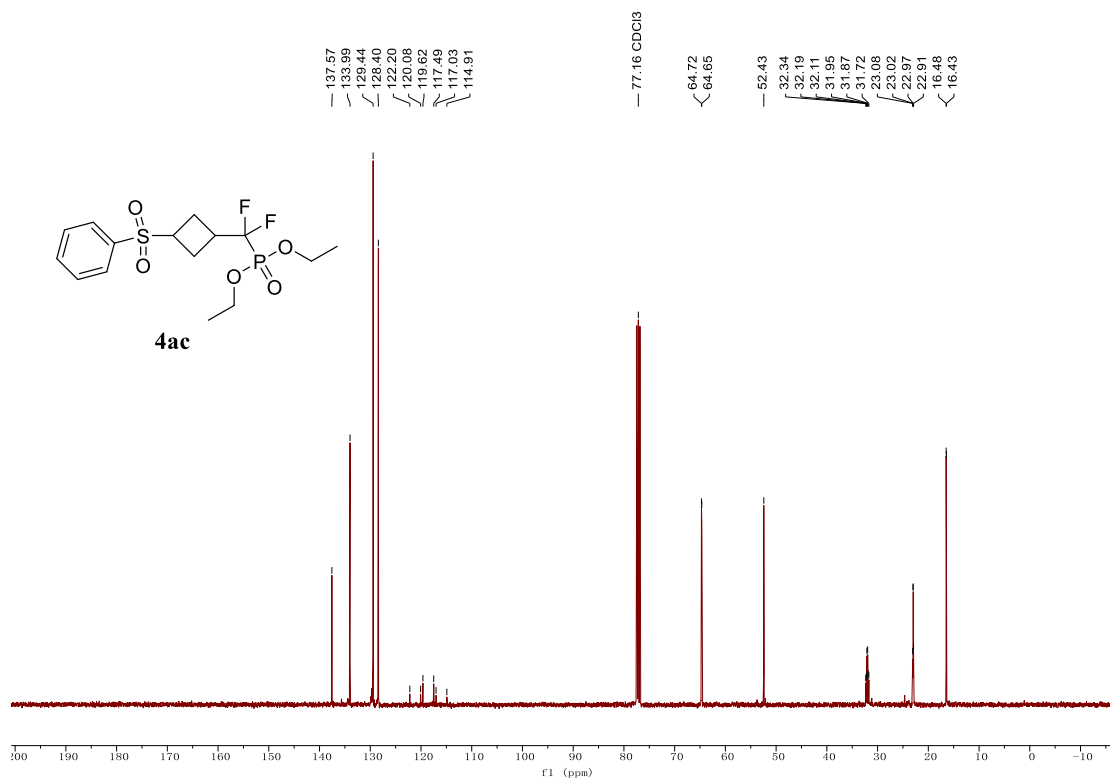

<sup>19</sup>F NMR Spectrum of Compound **4ac** (282 MHz, CDCl<sub>3</sub>)

← -119.97  
← -120.36

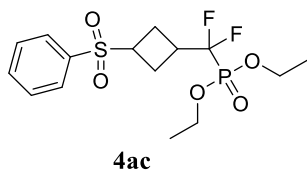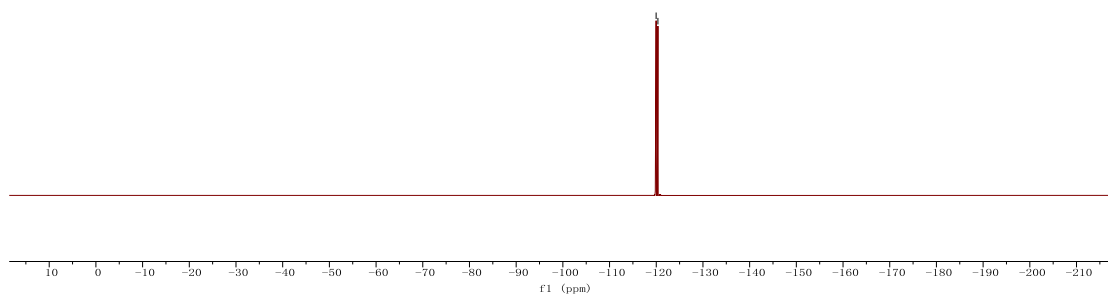

<sup>1</sup>H NMR Spectrum of Compound **4ad** (isomer 1) (300 MHz, CDCl<sub>3</sub>)

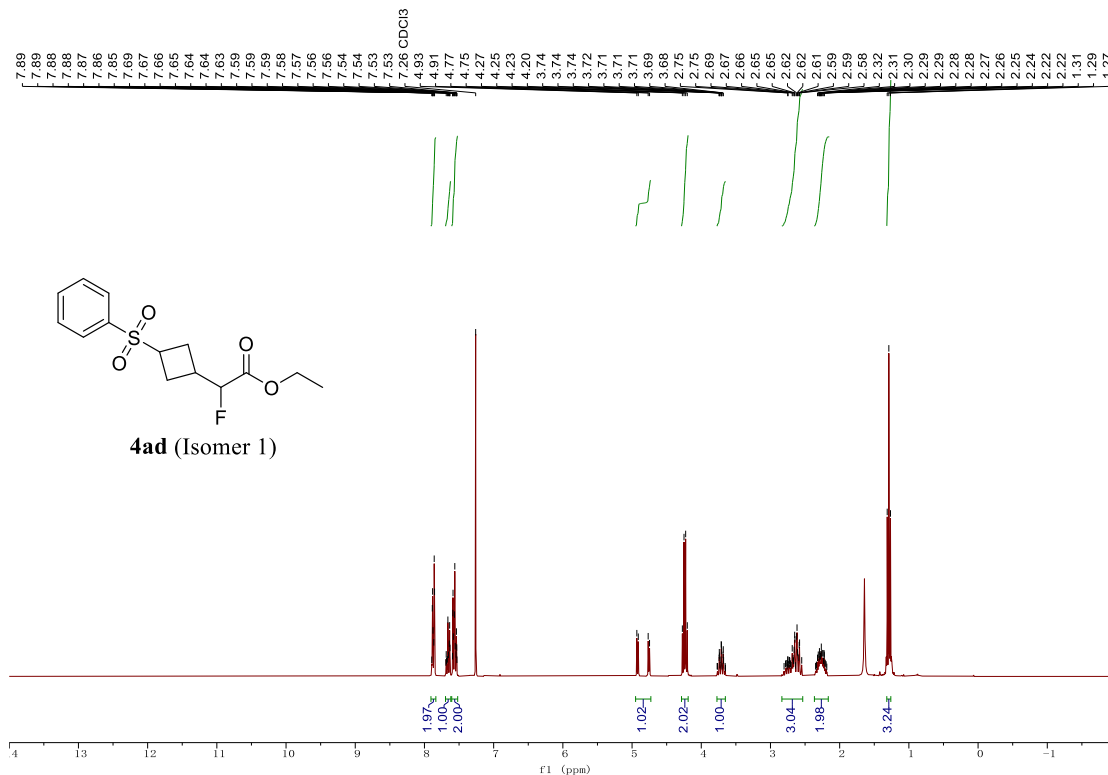

<sup>13</sup>C NMR Spectrum of Compound **4ad** (isomer 1) (75 MHz, CDCl<sub>3</sub>)

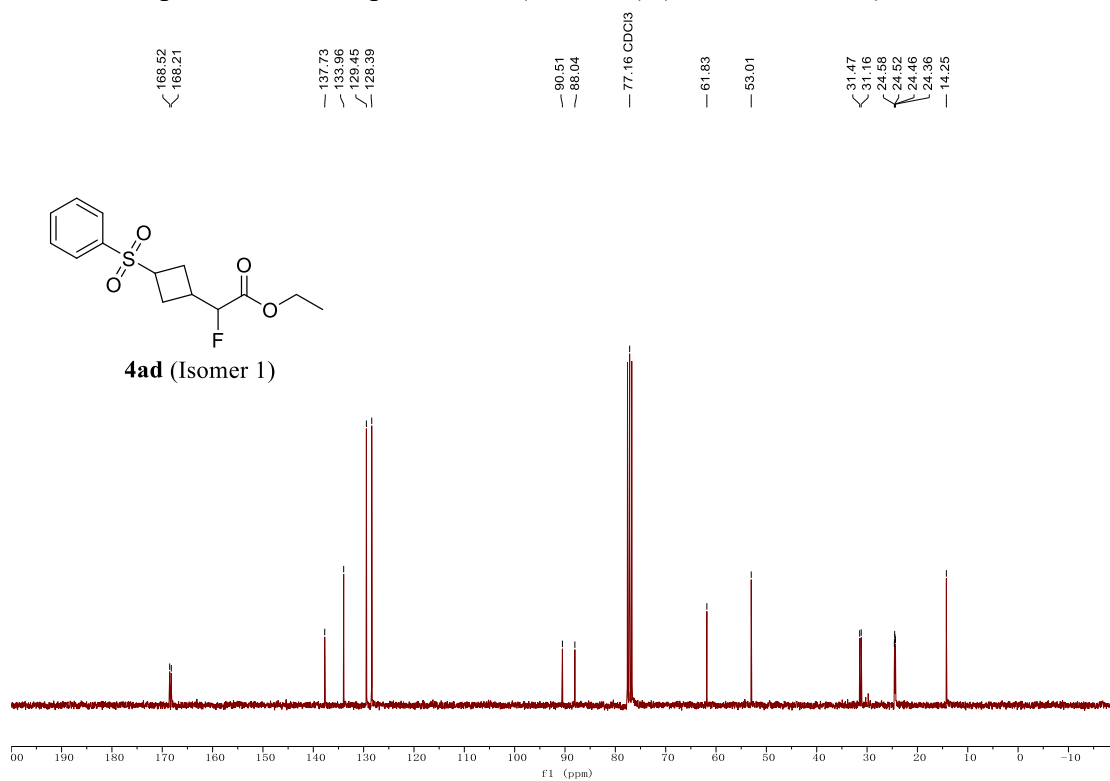

<sup>19</sup>F NMR Spectrum of Compound **4ad** (isomer 1) (282 MHz, CDCl<sub>3</sub>)

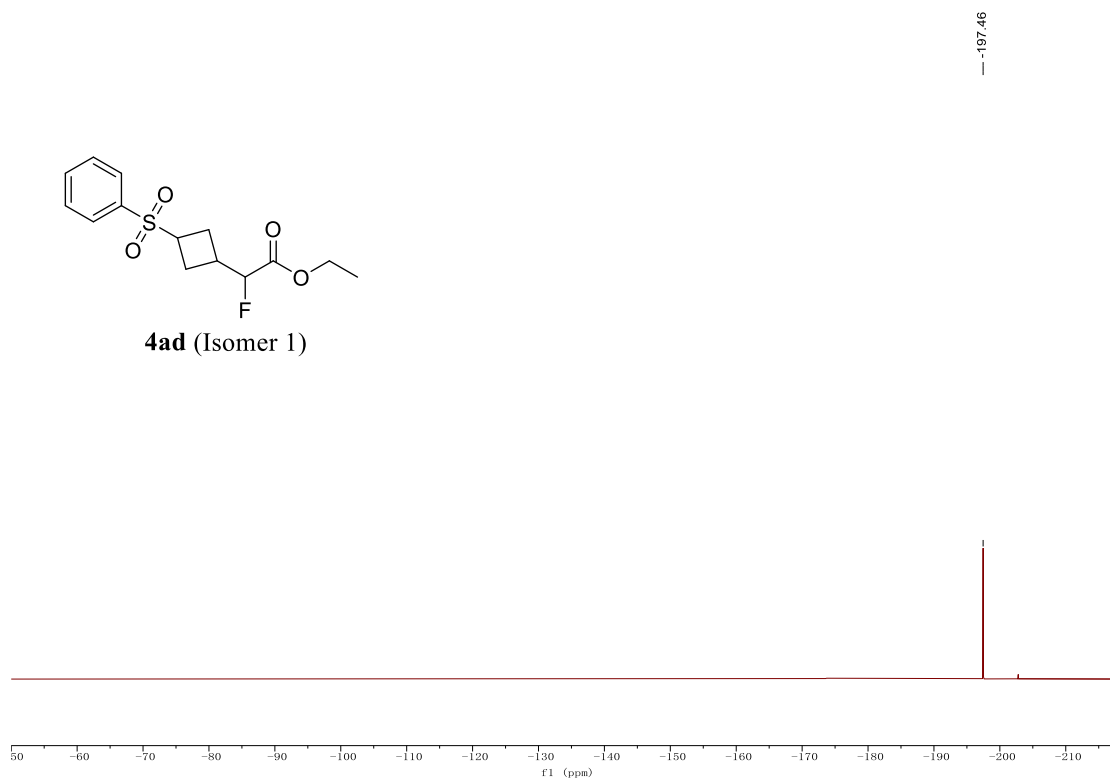



$^1\text{H}$  NMR Spectrum of Compound **4ad** (isomer 2) (300 MHz,  $\text{CDCl}_3$ )

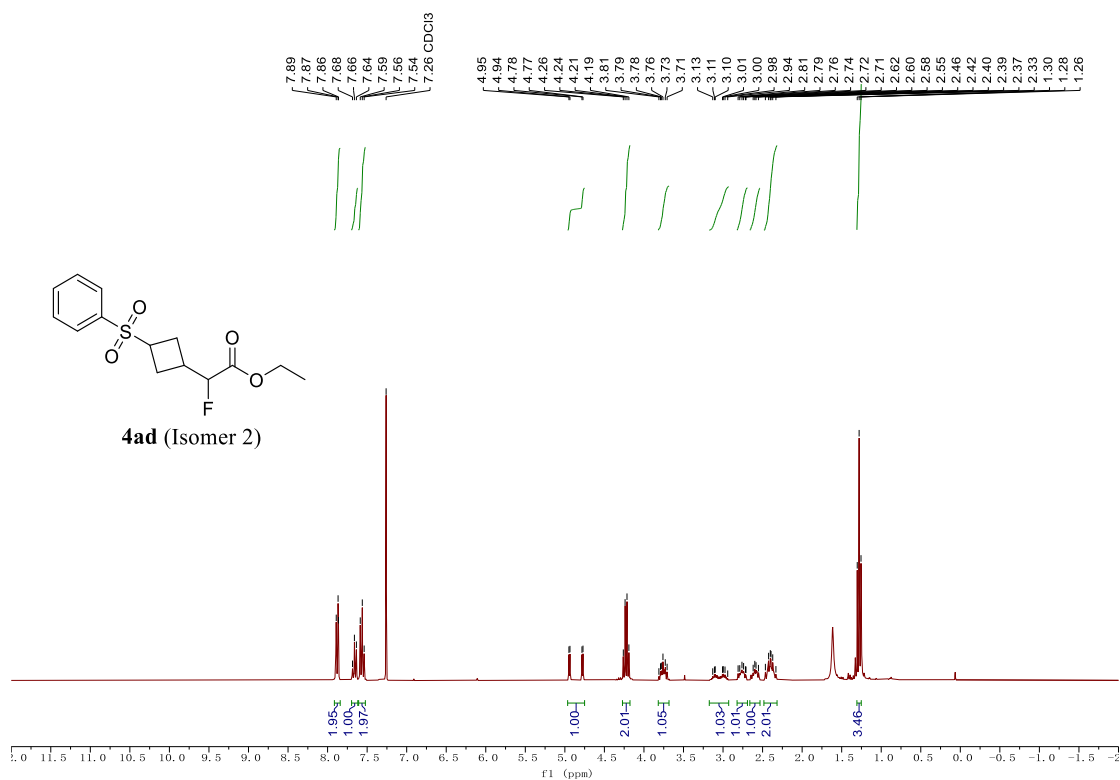

$^{13}\text{C}$  NMR Spectrum of Compound **4ad** (isomer 2) (75 MHz,  $\text{CDCl}_3$ )

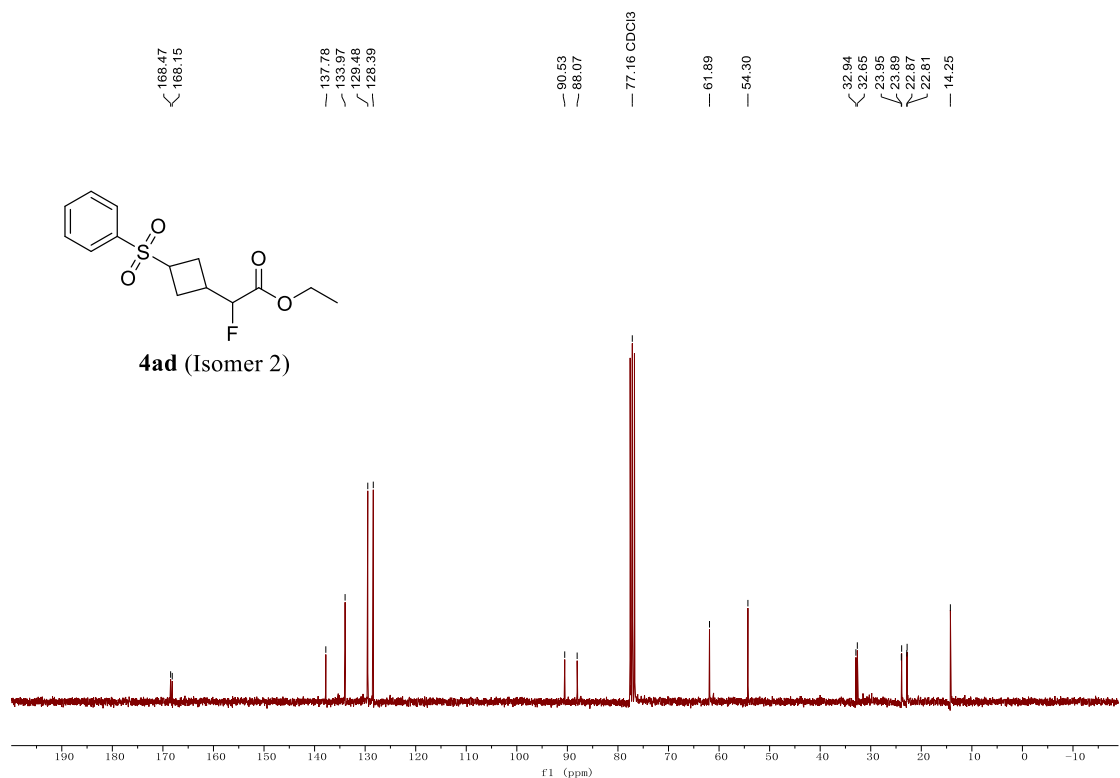

<sup>19</sup>F NMR Spectrum of Compound **4ad** (isomer 2) (282 MHz, CDCl<sub>3</sub>)

-202.80

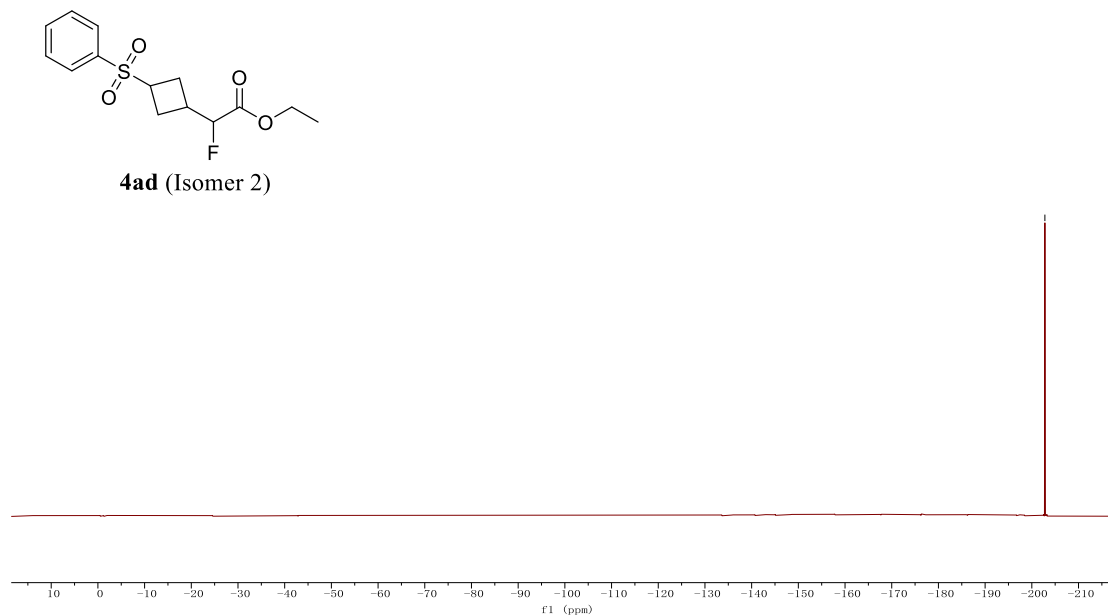

<sup>1</sup>H NMR Spectrum of Compound **4ae** (300 MHz, CDCl<sub>3</sub>)

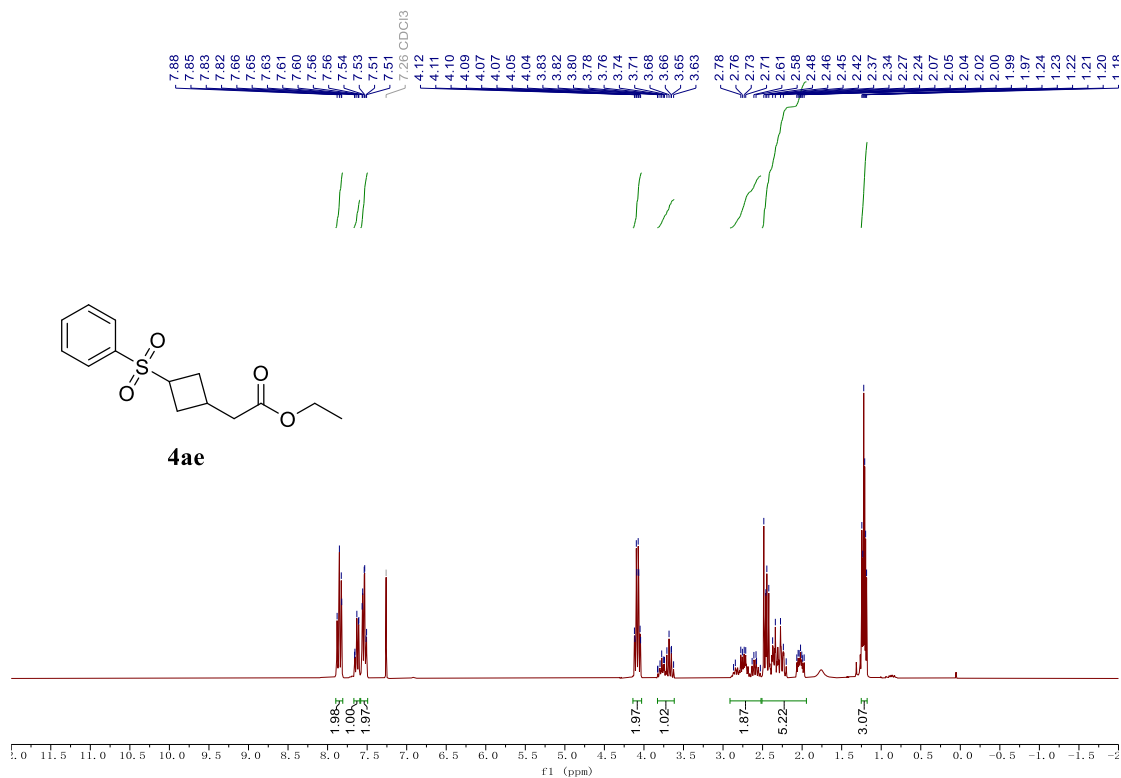

<sup>13</sup>C NMR Spectrum of Compound **4ae** (75 MHz, CDCl<sub>3</sub>)

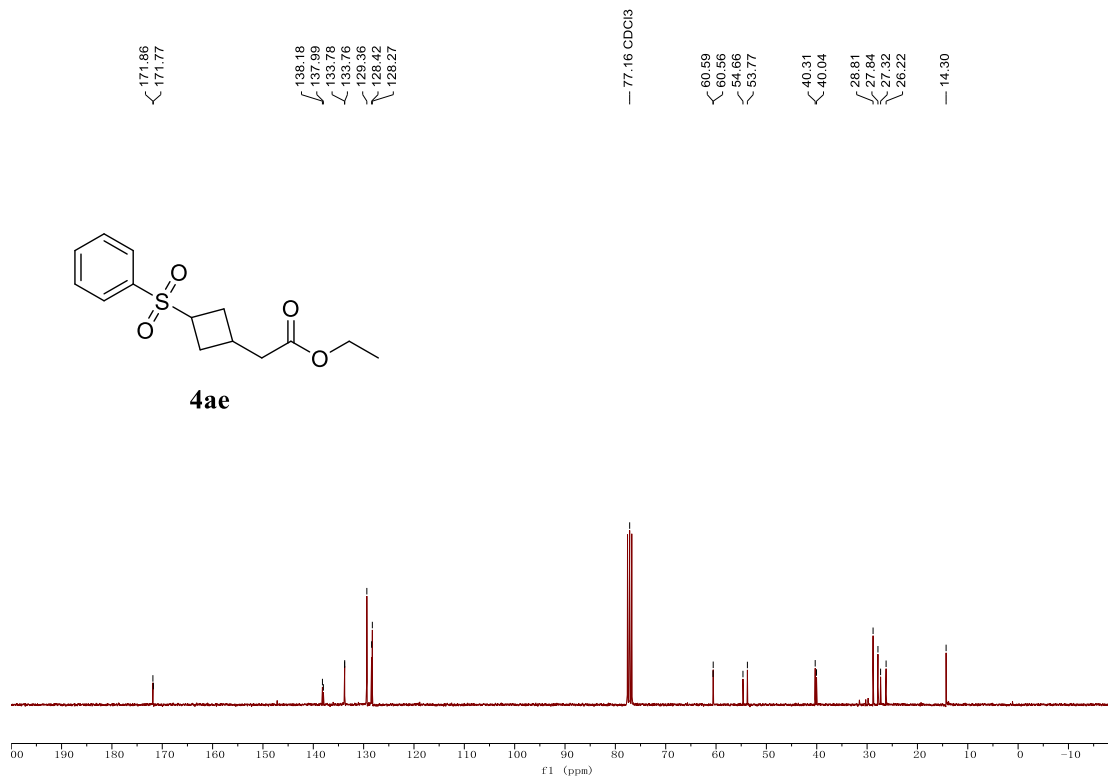

<sup>1</sup>H NMR Spectrum of Compound **5a** (300 MHz, CDCl<sub>3</sub>)

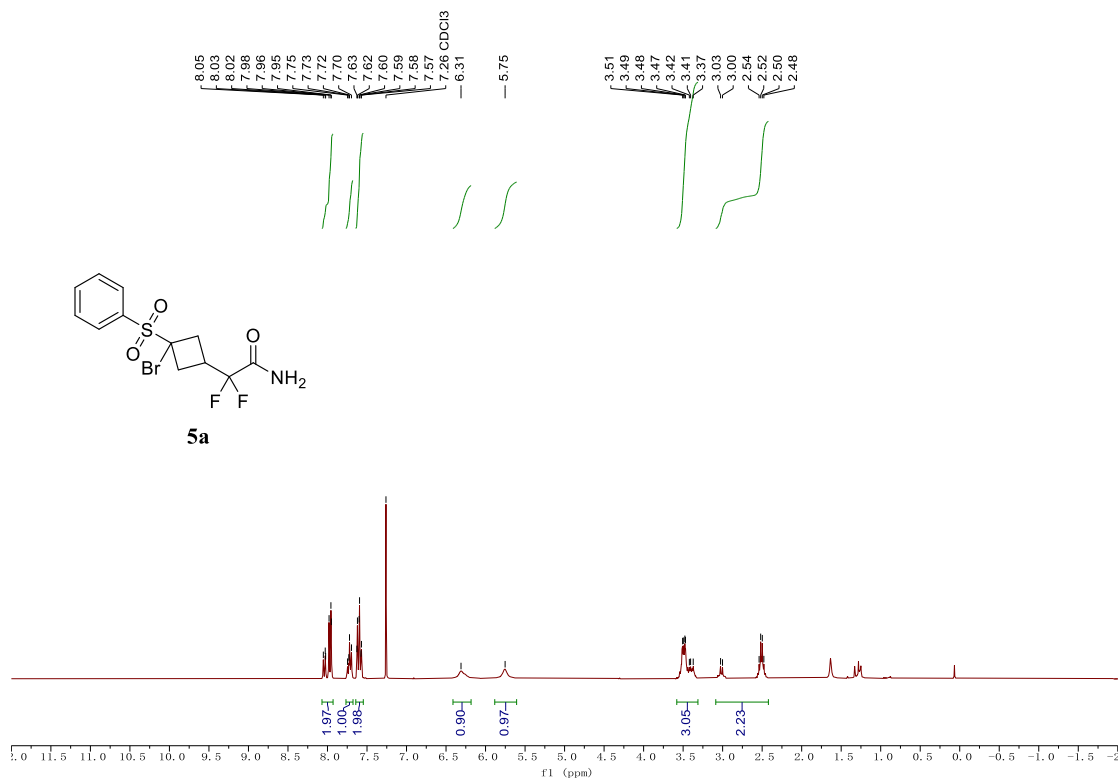

### $^{13}\text{C}$ NMR Spectrum of Compound **5a** (75 MHz, $\text{CDCl}_3$ )

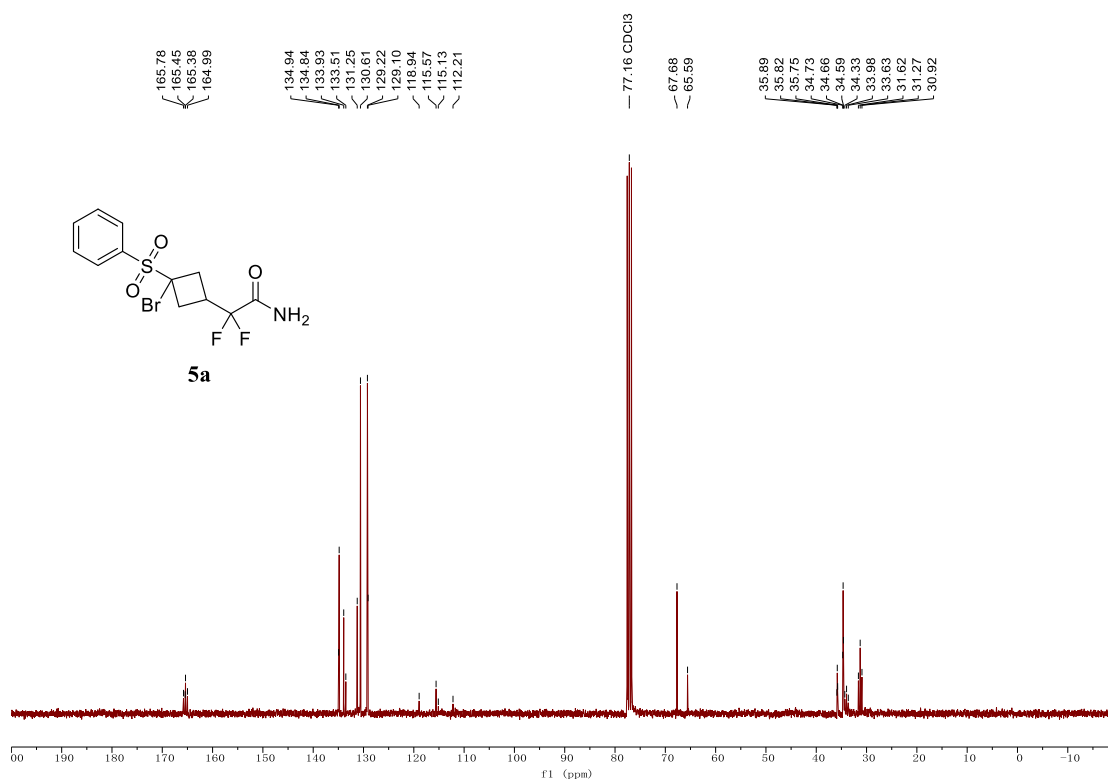

### $^{19}\text{F}$ NMR Spectrum of Compound **5a** (282 MHz, $\text{CDCl}_3$ )

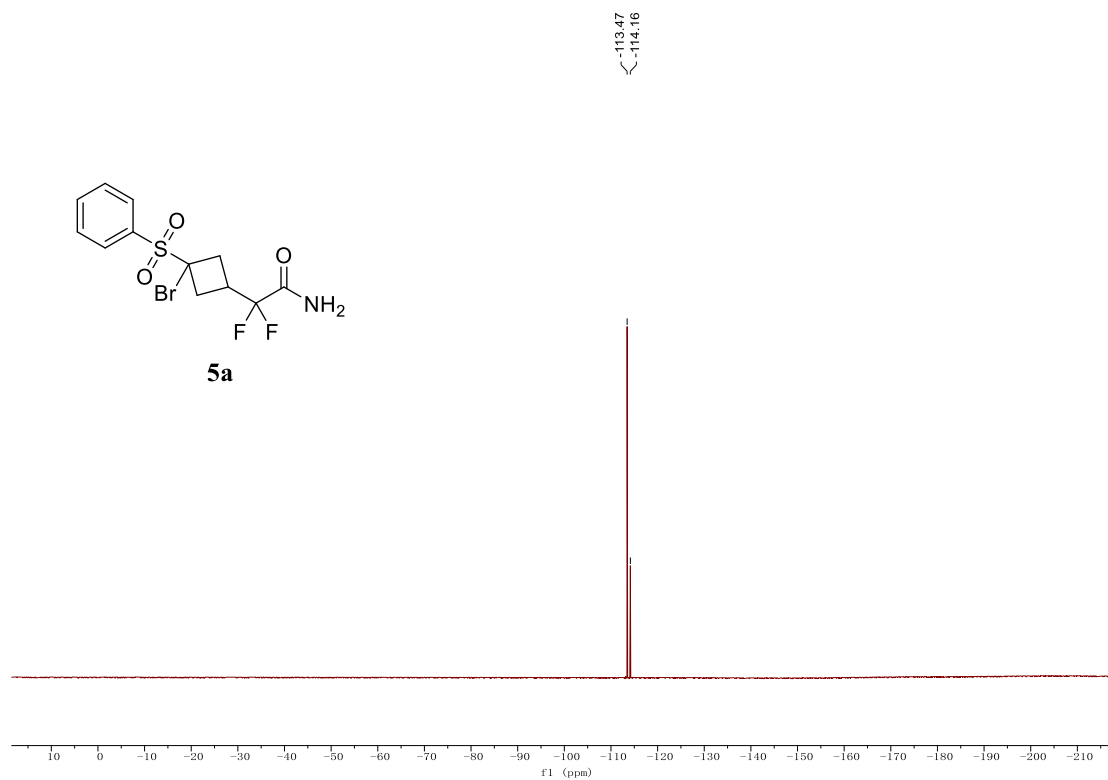

<sup>1</sup>H NMR Spectrum of Compound **5b** (300 MHz, CDCl<sub>3</sub>)

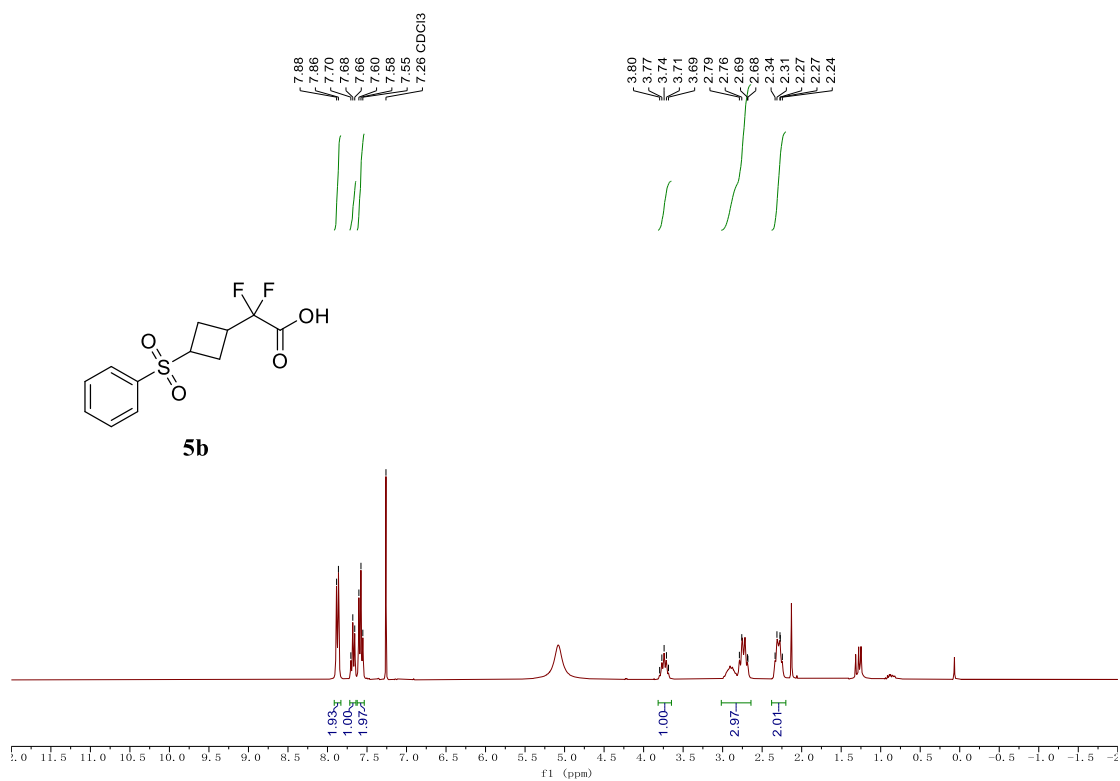

<sup>13</sup>C NMR Spectrum of Compound **5b** (101 MHz, Acetone-*d*<sub>6</sub>)

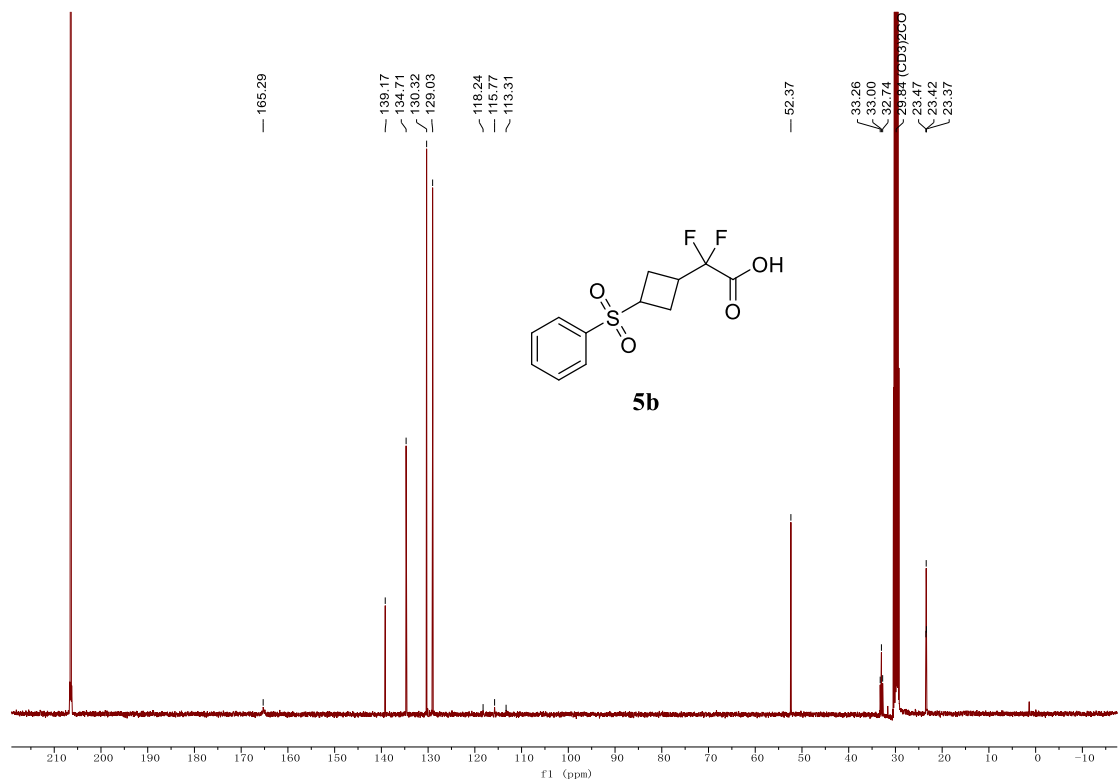

<sup>19</sup>F NMR Spectrum of Compound **5b** (282 MHz, CDCl<sub>3</sub>)

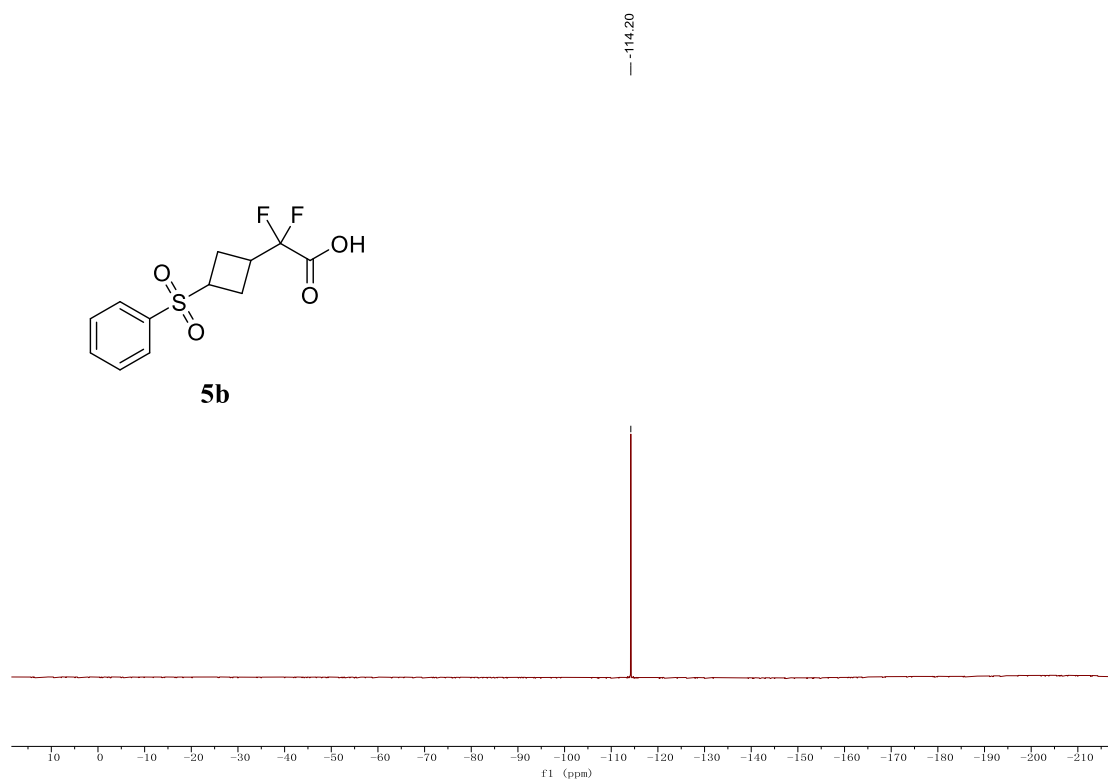

<sup>1</sup>H NMR Spectrum of Compound **5c** (300 MHz, CDCl<sub>3</sub>)

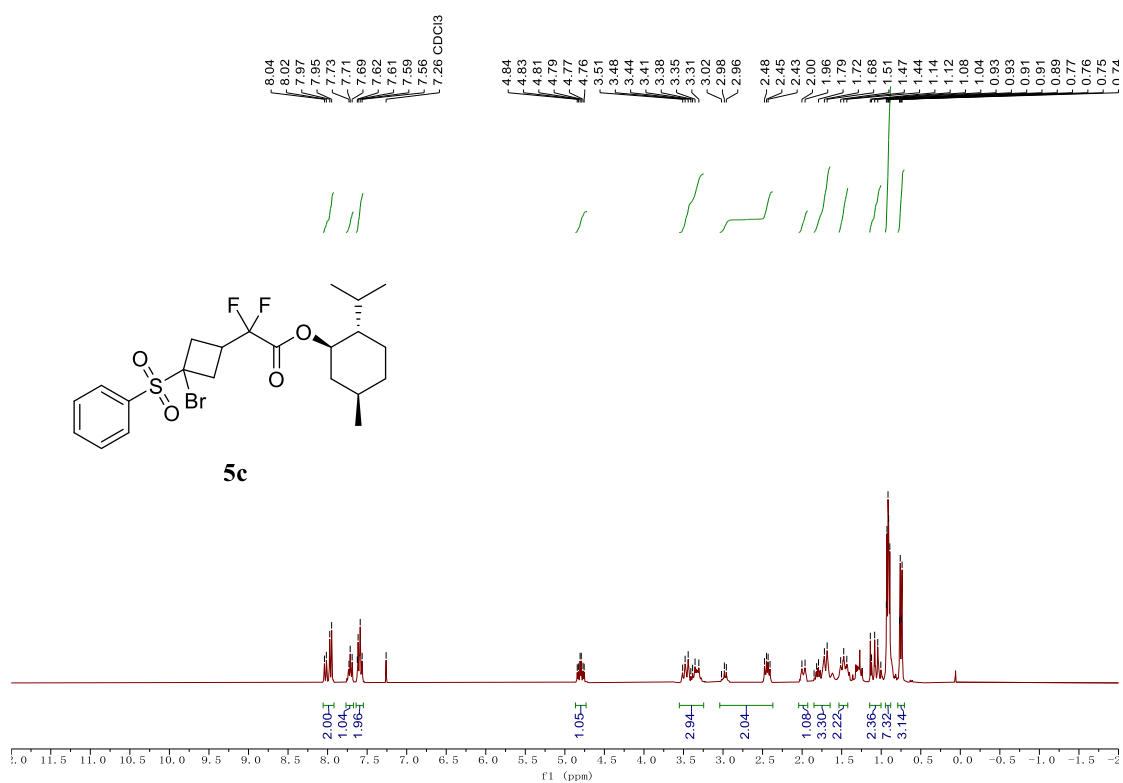

### $^{13}\text{C}$ NMR Spectrum of Compound **5c** (75 MHz, $\text{CDCl}_3$ )

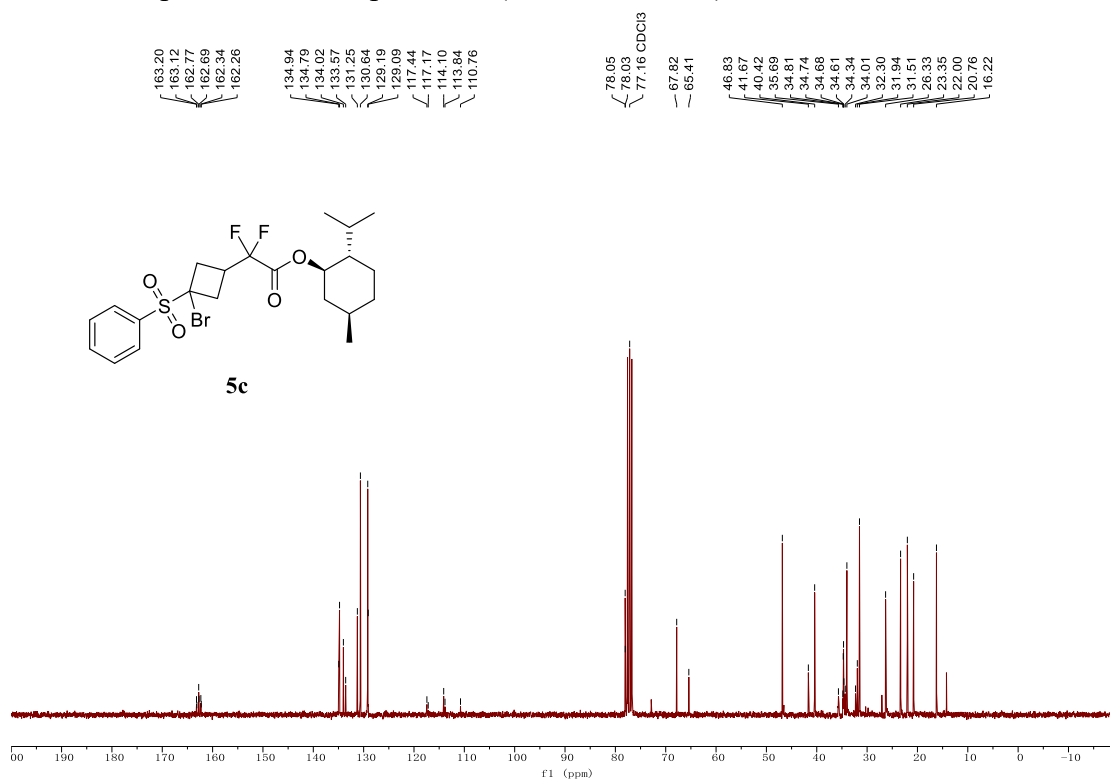

### $^{19}\text{F}$ NMR Spectrum of Compound **5c** (282 MHz, $\text{CDCl}_3$ )

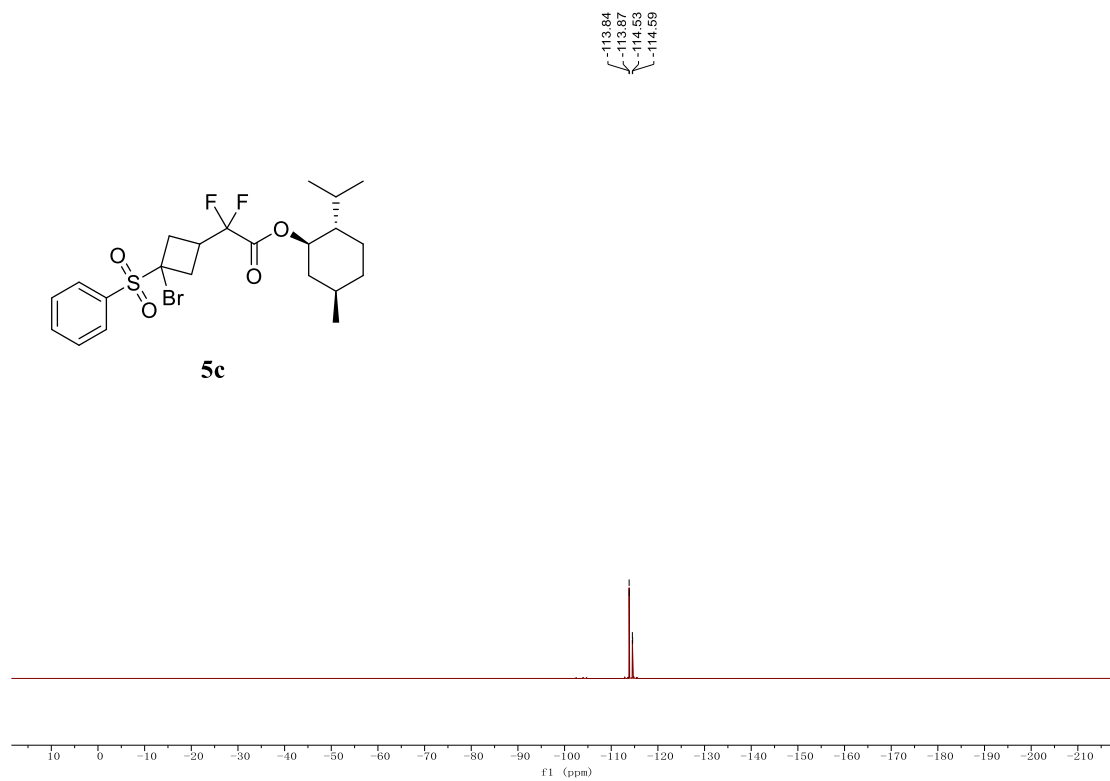

<sup>1</sup>H NMR Spectrum of Compound **5d** (300 MHz, CDCl<sub>3</sub>)

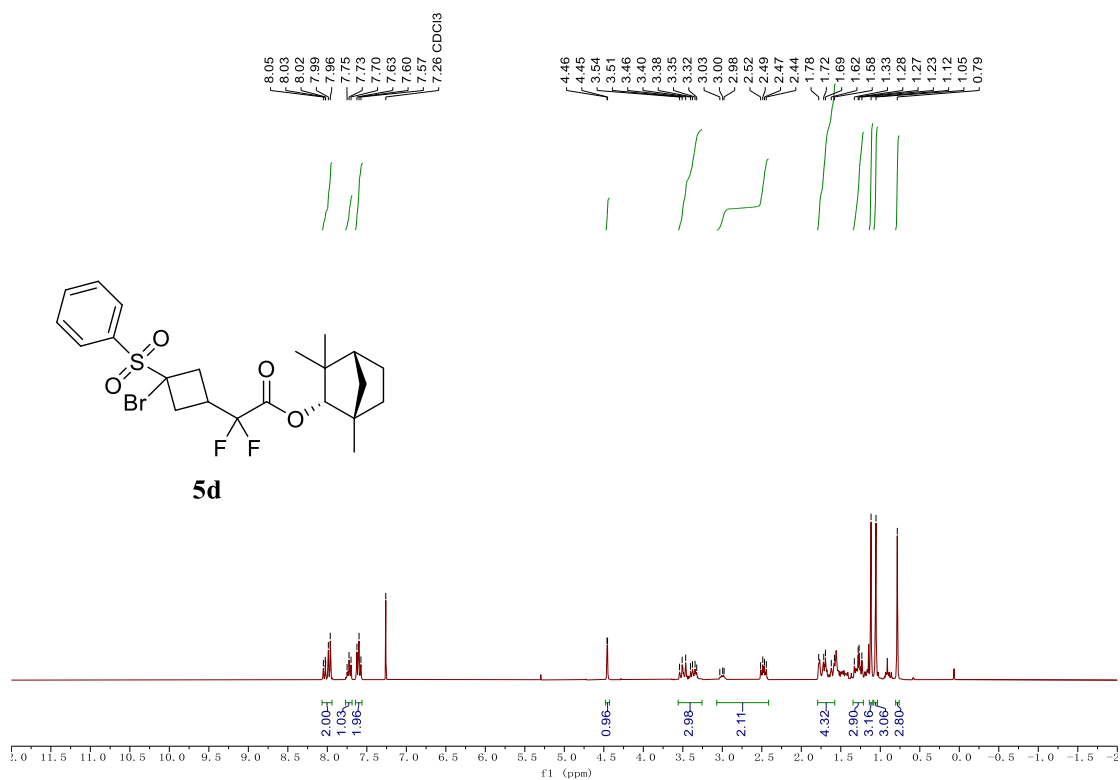

<sup>13</sup>C NMR Spectrum of Compound **5d** (75 MHz, CDCl<sub>3</sub>)

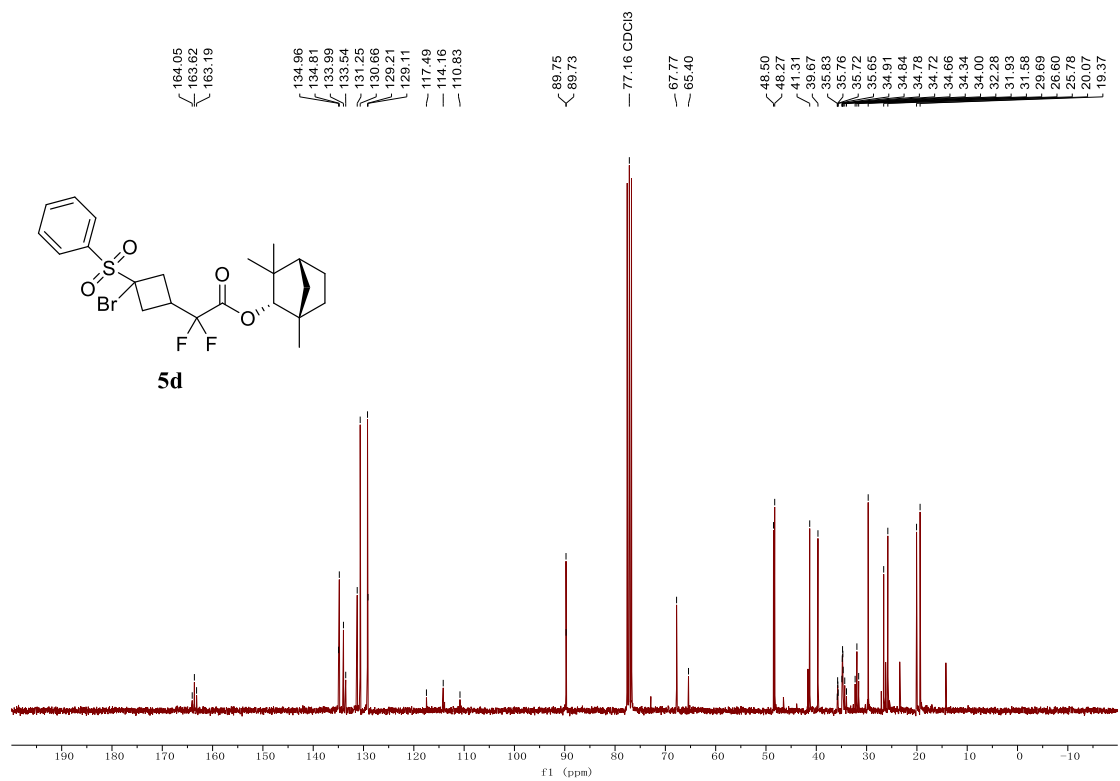





### <sup>13</sup>C NMR Spectrum of Compound **5e** (75 MHz, CDCl<sub>3</sub>)

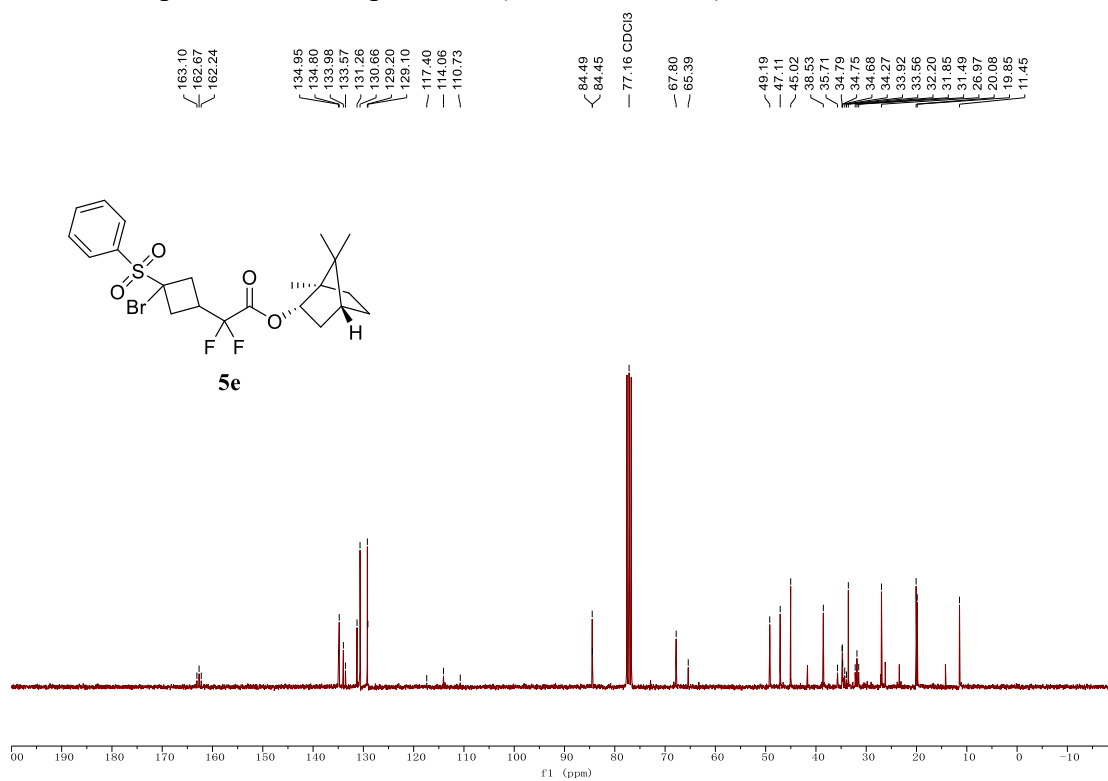

### <sup>19</sup>F NMR Spectrum of Compound **5e** (282 MHz, CDCl<sub>3</sub>)

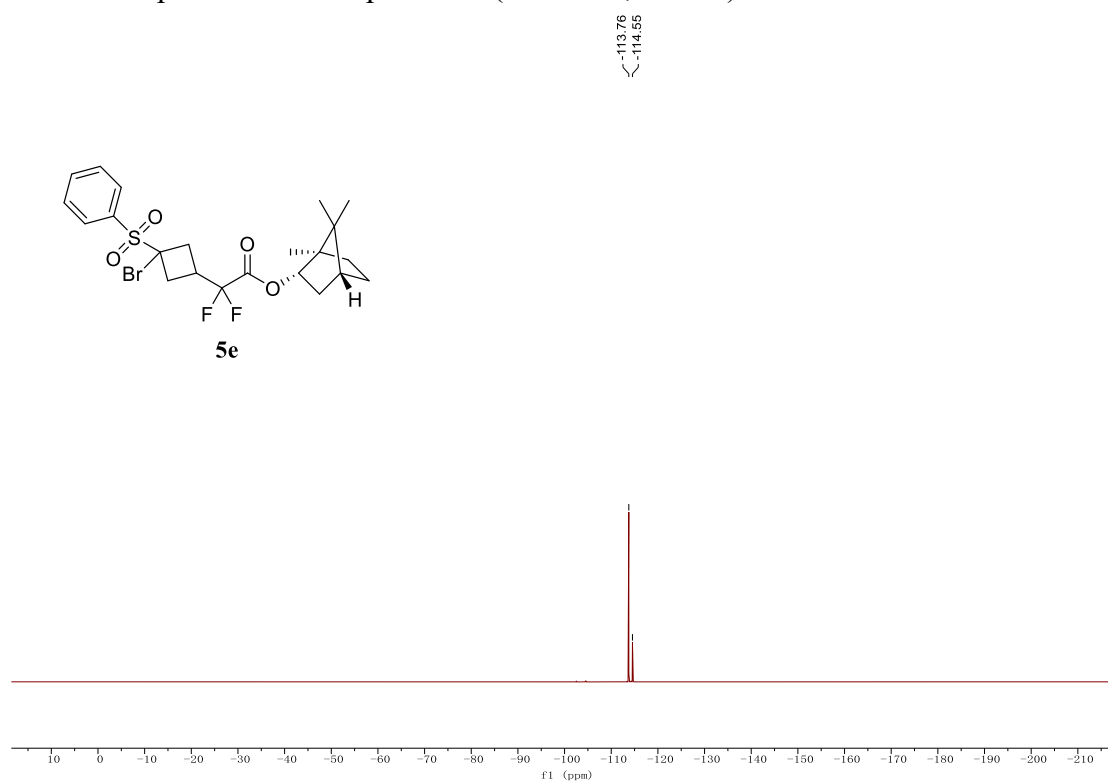

# <sup>1</sup>H NMR Spectrum of Compound **5f** (300 MHz, CDCl<sub>3</sub>)

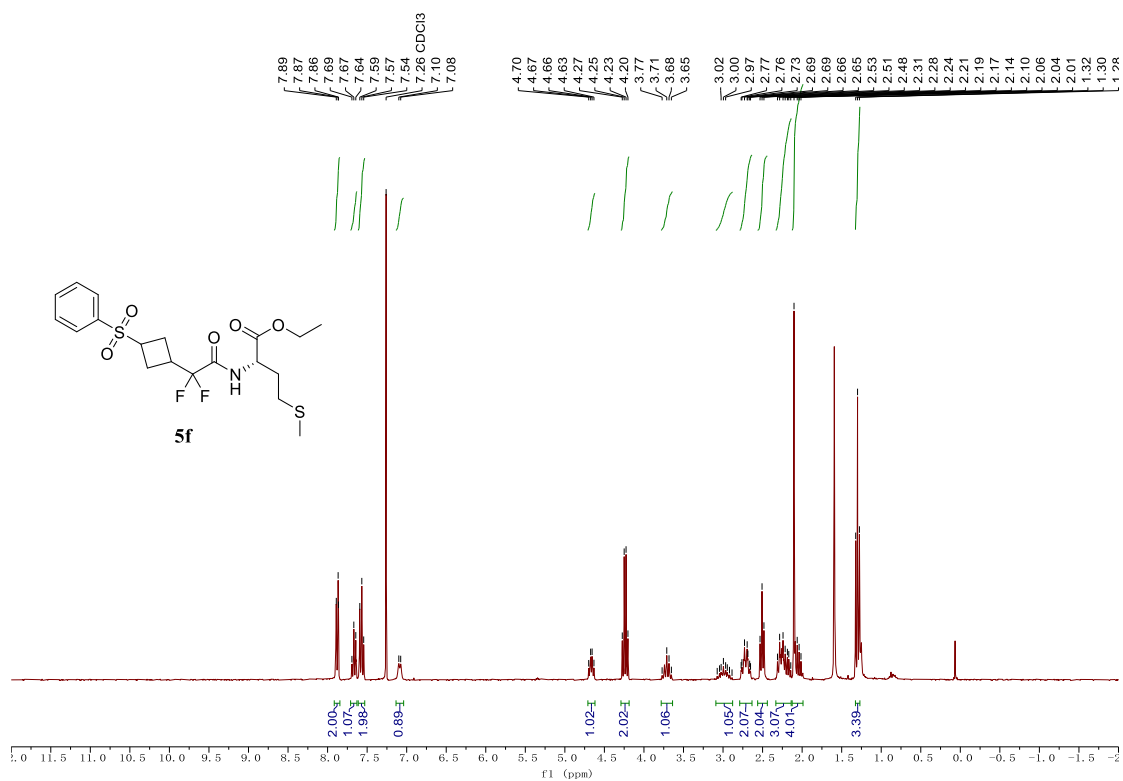

# <sup>13</sup>C NMR Spectrum of Compound **5f** (75 MHz, CDCl<sub>3</sub>)

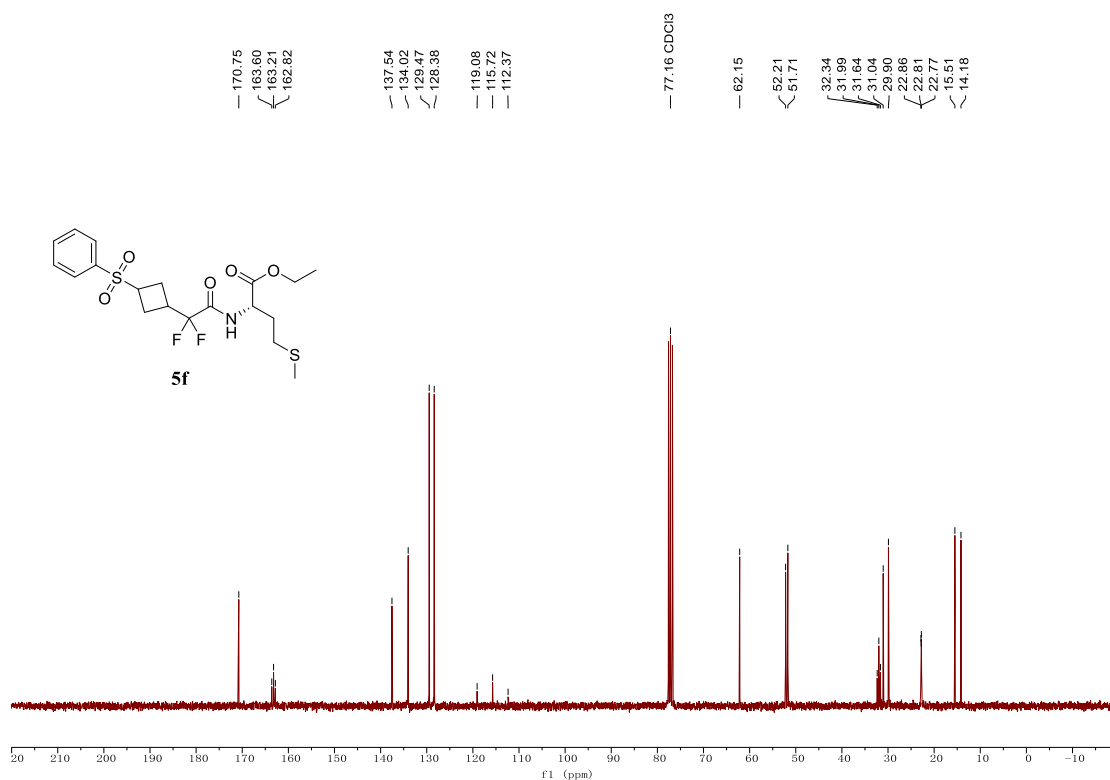

<sup>19</sup>F NMR Spectrum of Compound **5f** (282 MHz, CDCl<sub>3</sub>)

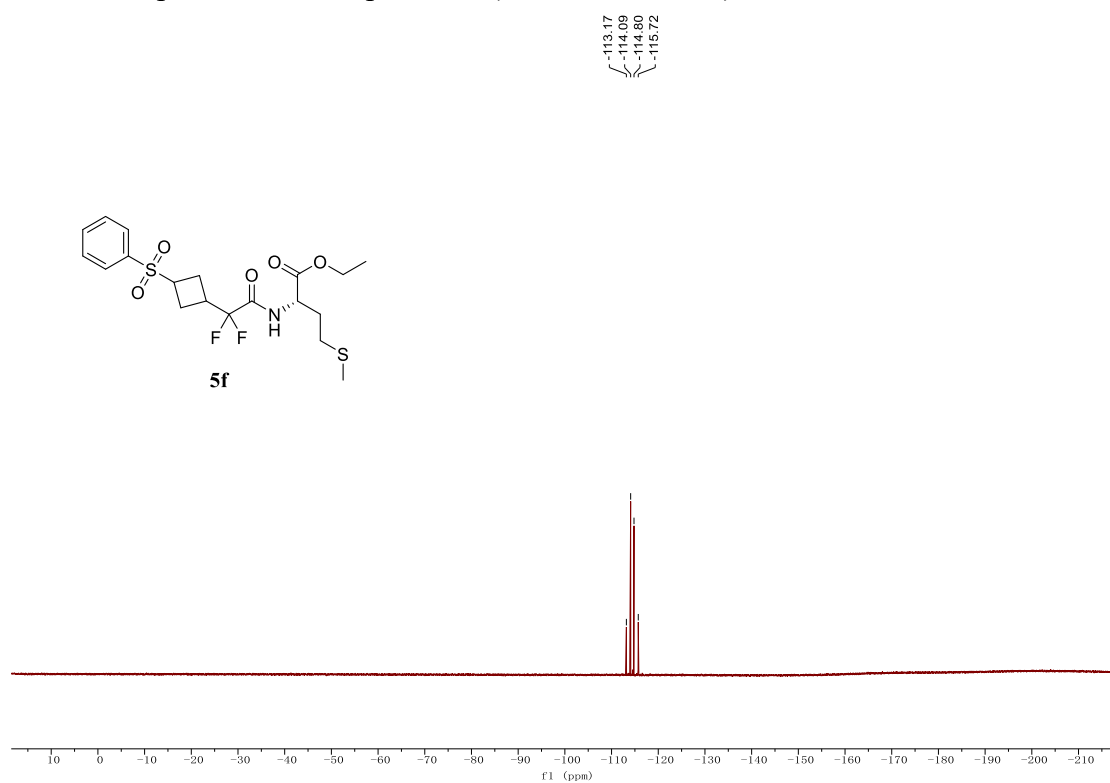

<sup>1</sup>H NMR Spectrum of Compound **5g** (300 MHz, CDCl<sub>3</sub>)

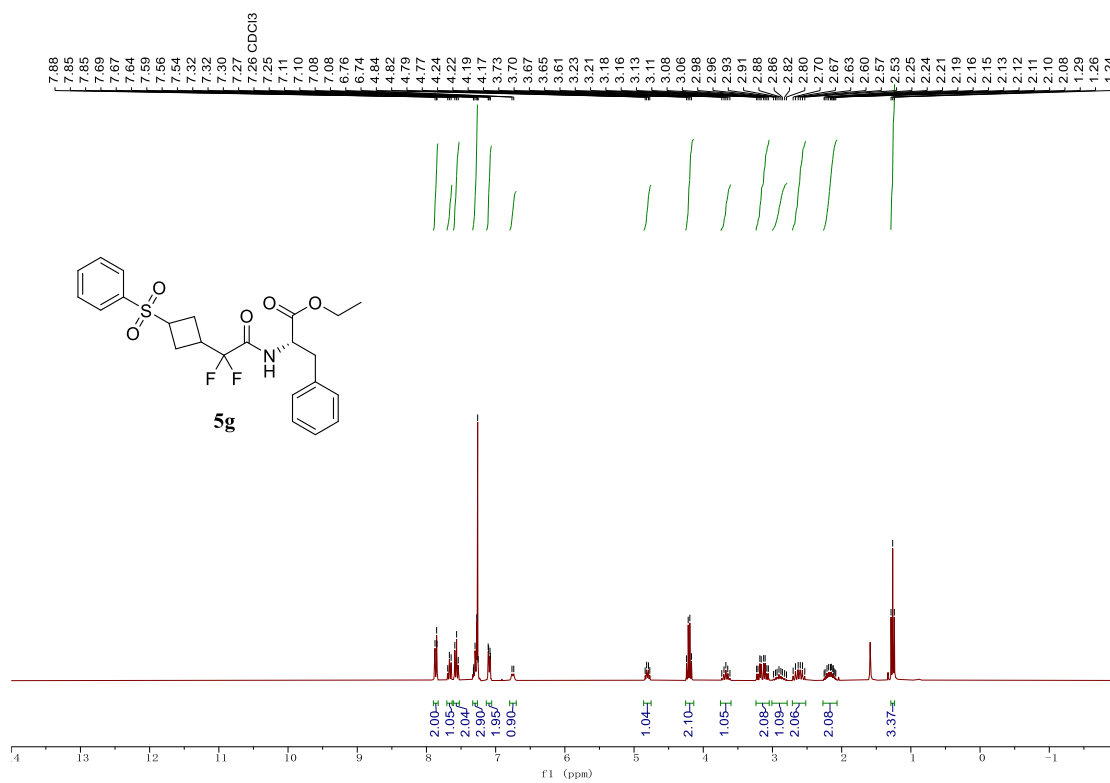

### <sup>13</sup>C NMR Spectrum of Compound **5g** (75 MHz, CDCl<sub>3</sub>)

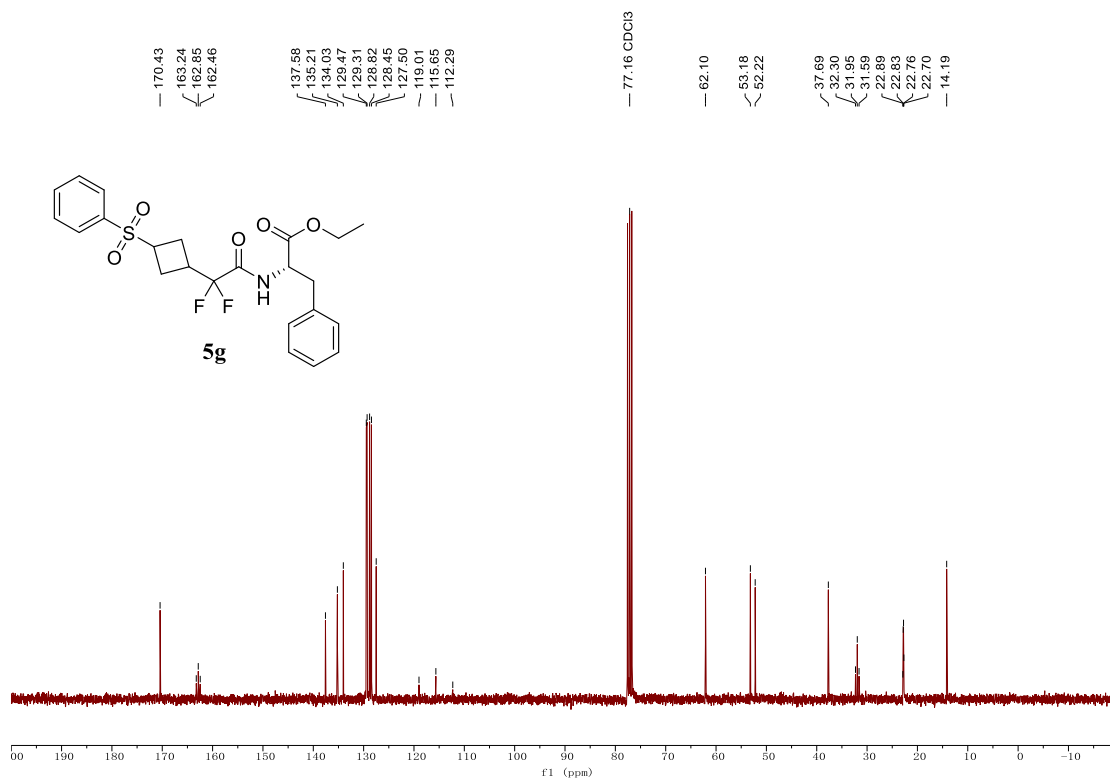

### <sup>19</sup>F NMR Spectrum of Compound **5g** (282 MHz, CDCl<sub>3</sub>)

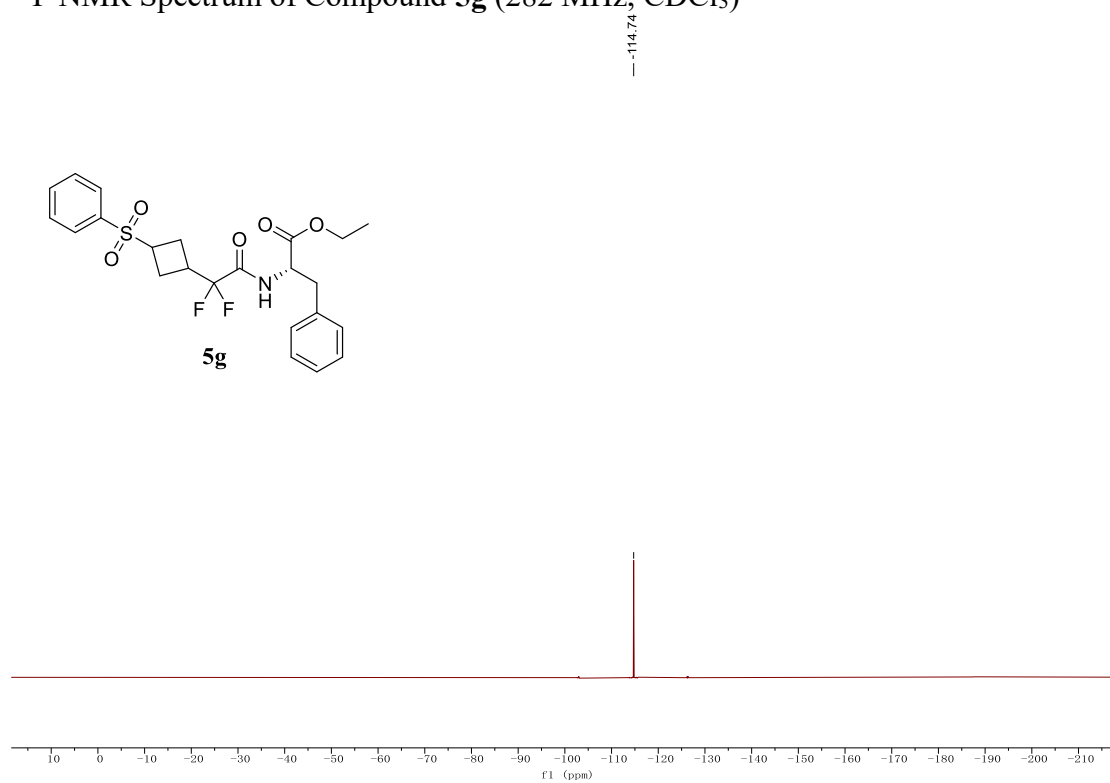

<sup>1</sup>H NMR Spectrum of Compound **5h** (300 MHz, CDCl<sub>3</sub>)

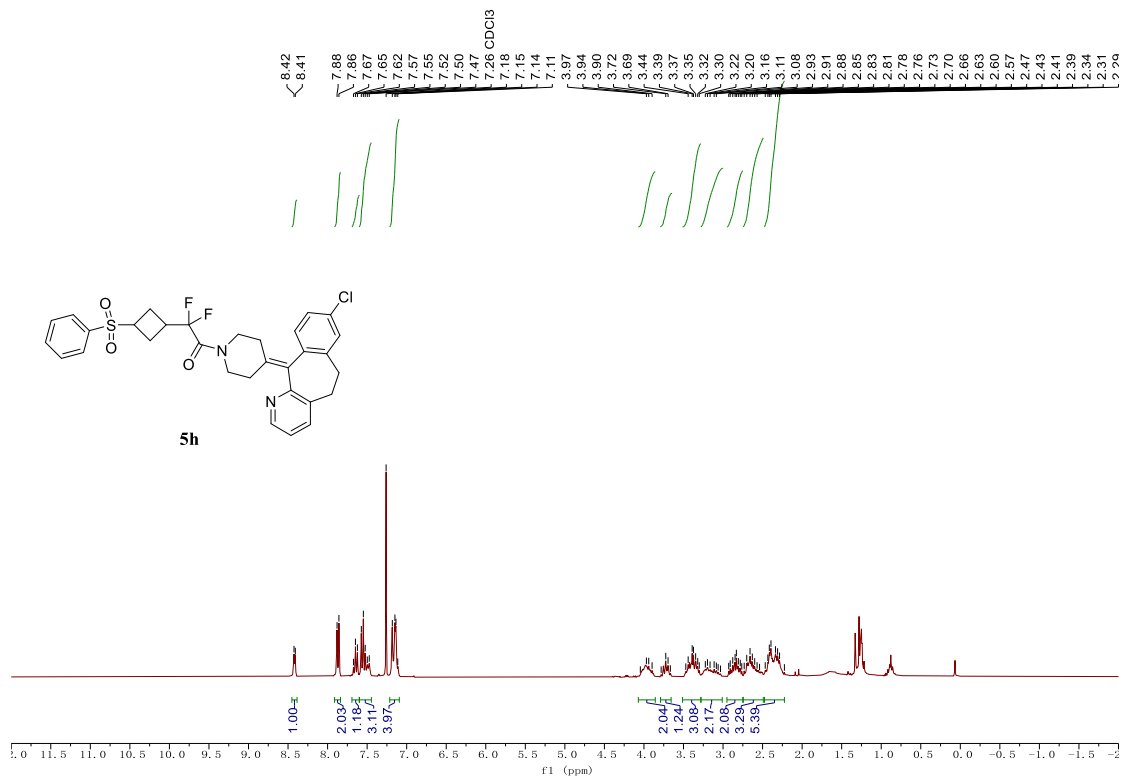

<sup>13</sup>C NMR Spectrum of Compound **5h** (101 MHz, CDCl<sub>3</sub>)

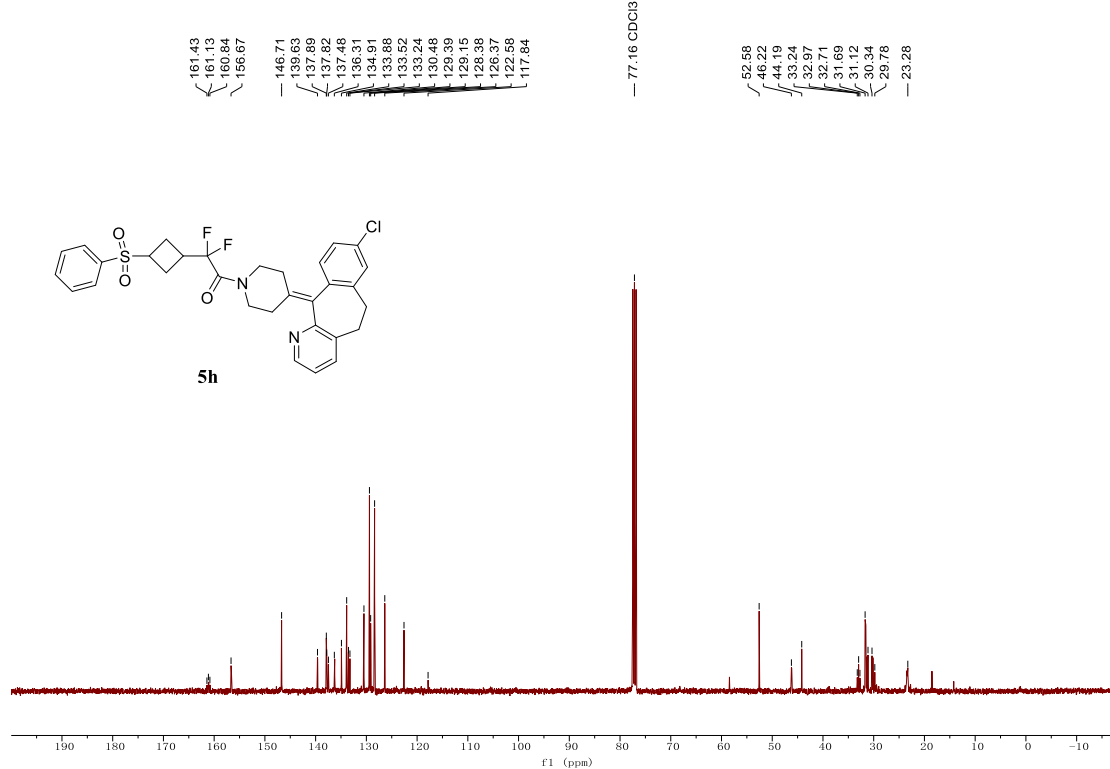

<sup>19</sup>F NMR Spectrum of Compound **5h** (282 MHz, CDCl<sub>3</sub>)

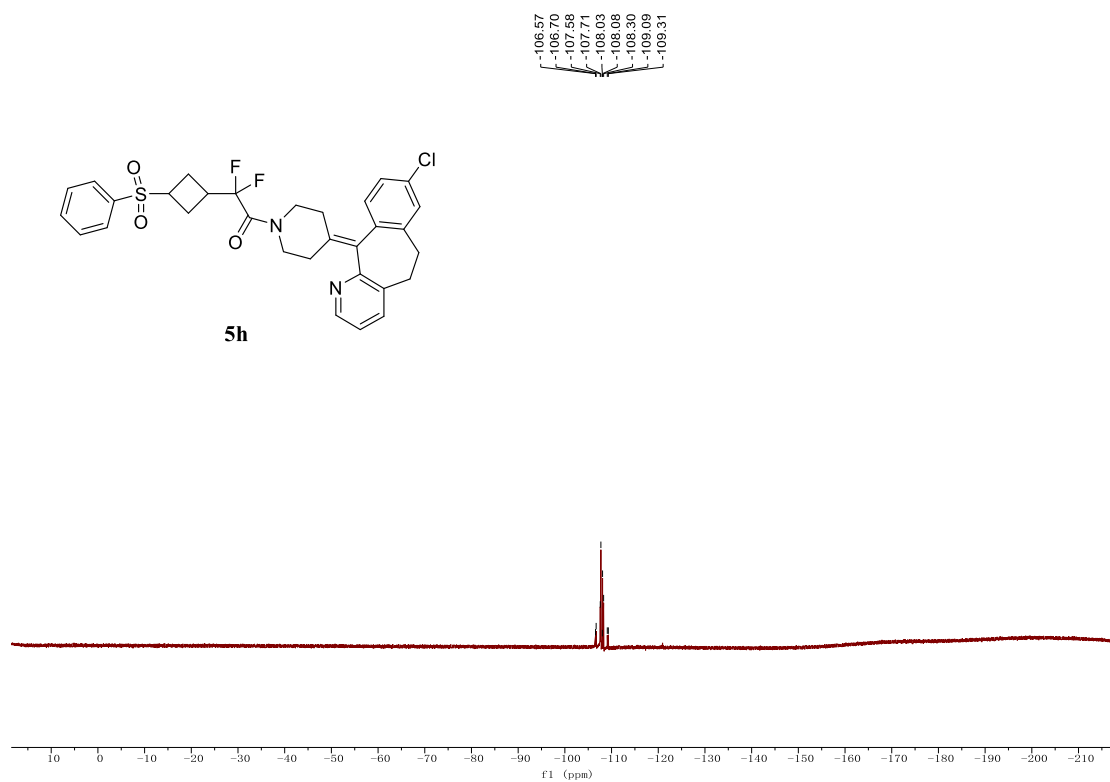

<sup>1</sup>H NMR Spectrum of Compound **5j** (300 MHz, CDCl<sub>3</sub>)

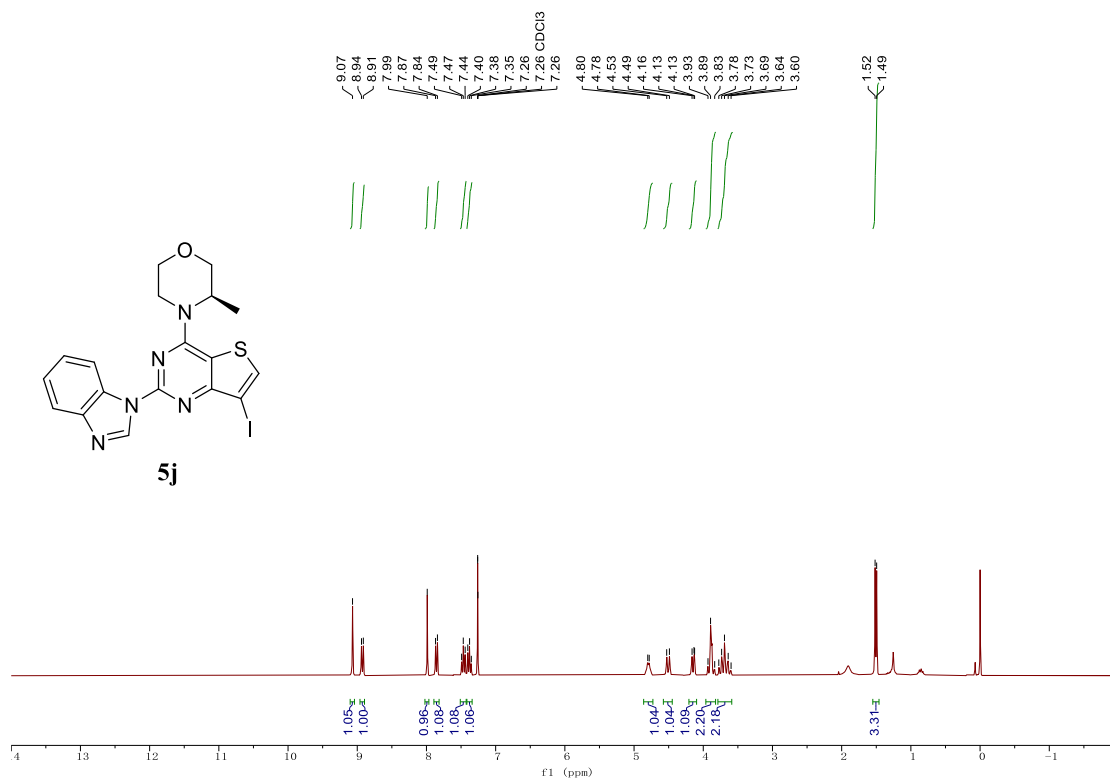

<sup>1</sup>H NMR Spectrum of Compound **5k** (400 MHz, CDCl<sub>3</sub>)

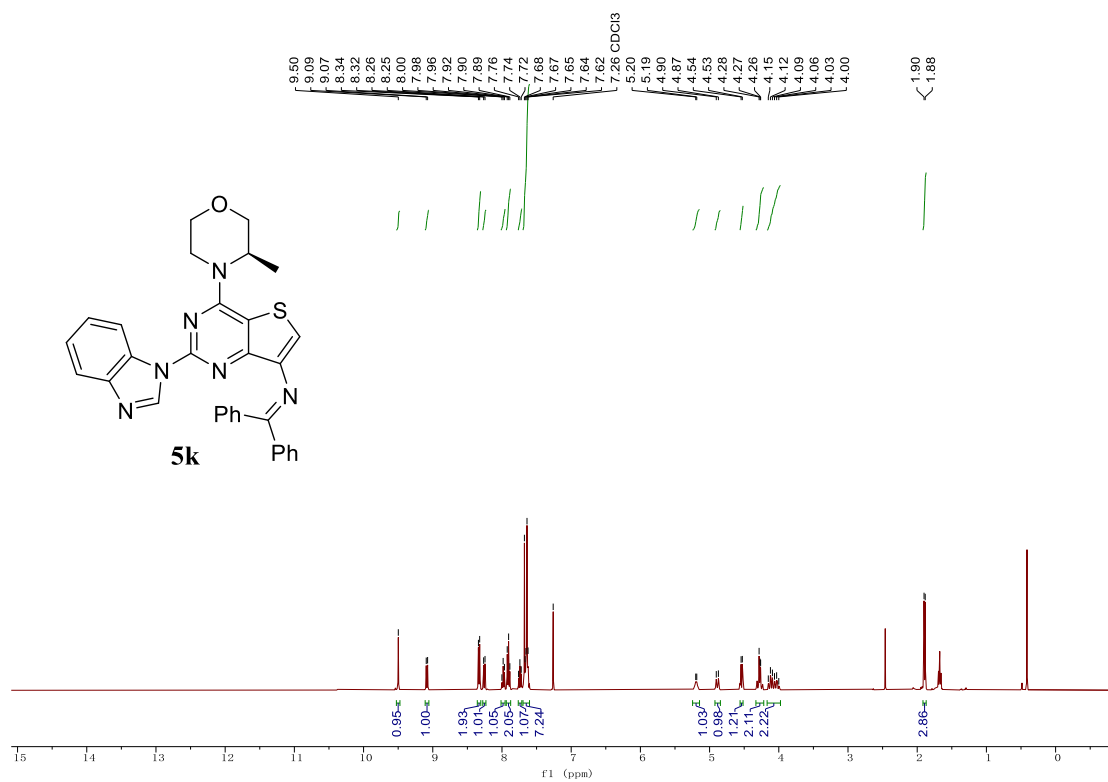

<sup>1</sup>H NMR Spectrum of Compound **5l** (300 MHz, DMSO-d<sub>6</sub>)

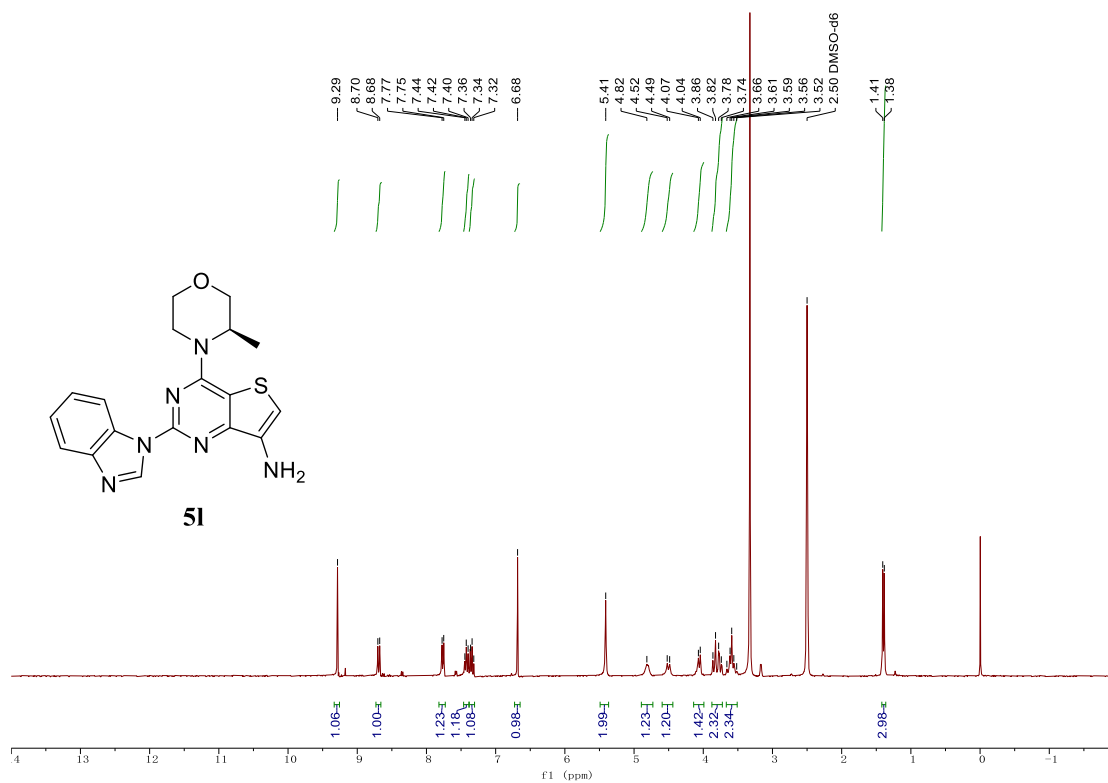



<sup>1</sup>H NMR Spectrum of Compound **5m** (300 MHz, CDCl<sub>3</sub>)

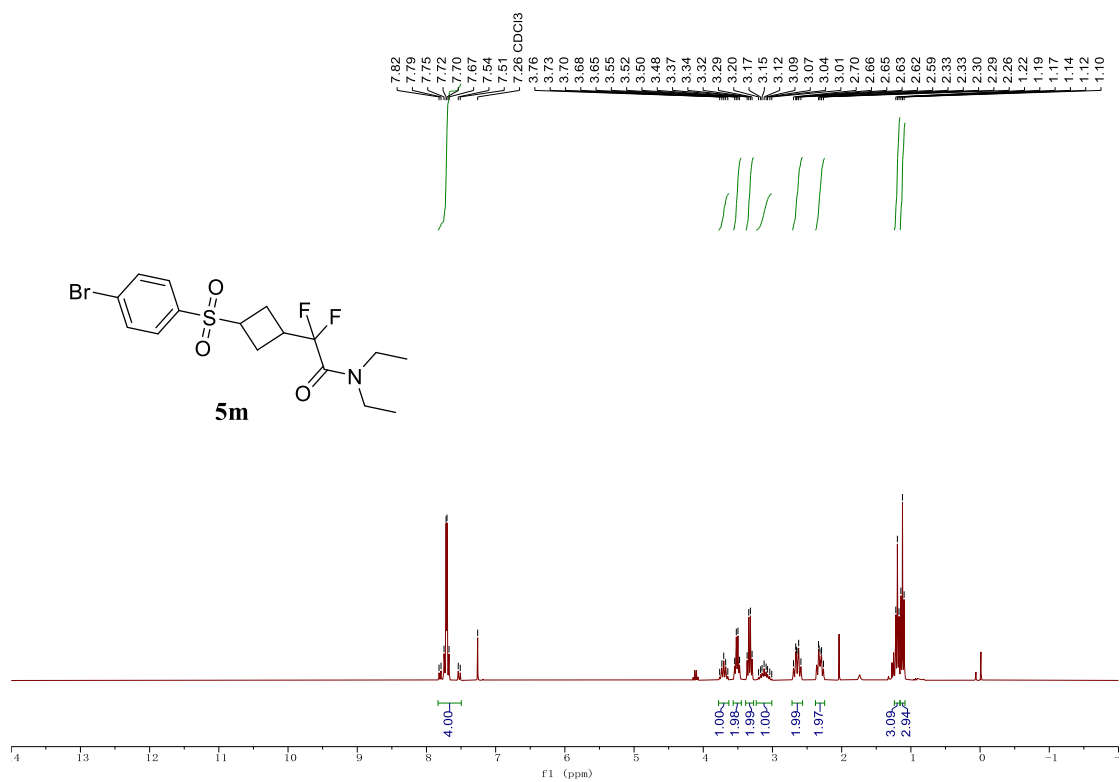

<sup>19</sup>F NMR Spectrum of Compound **5m** (282 MHz, CDCl<sub>3</sub>)

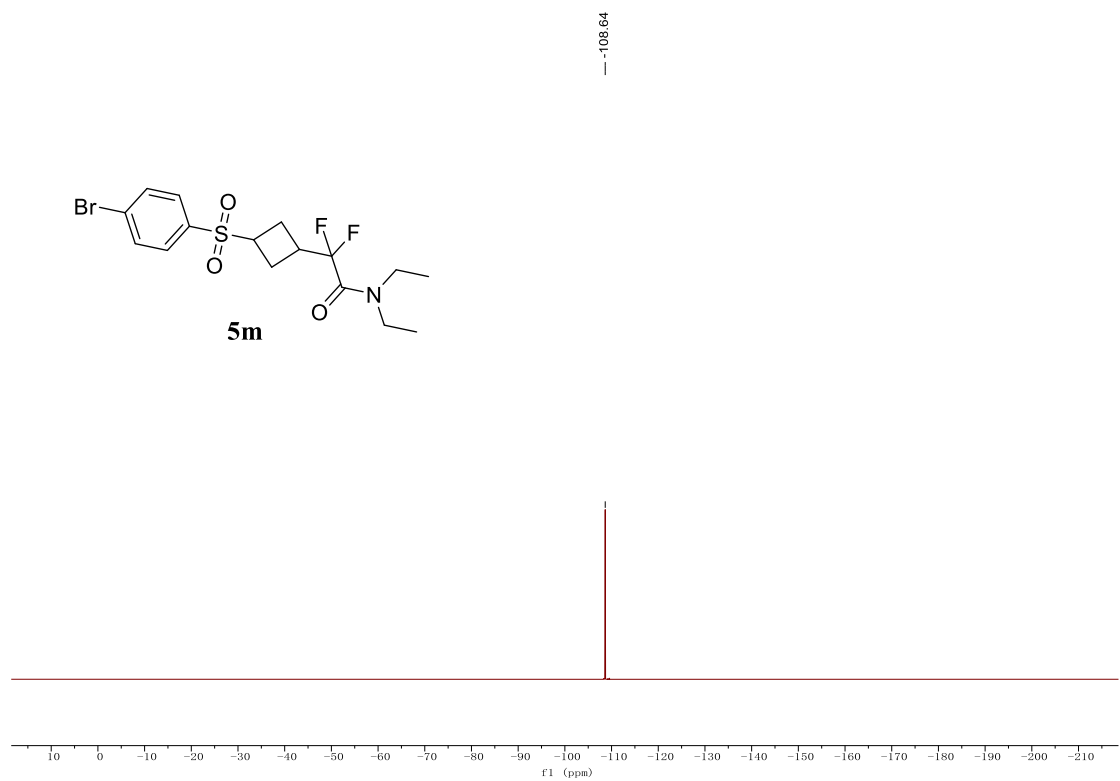



<sup>19</sup>F NMR Spectrum of Compound **5n** (282 MHz, CDCl<sub>3</sub>)

-108.48

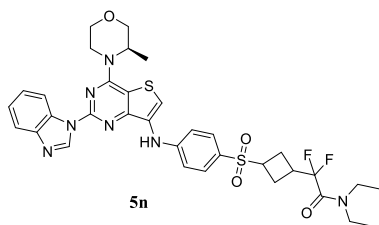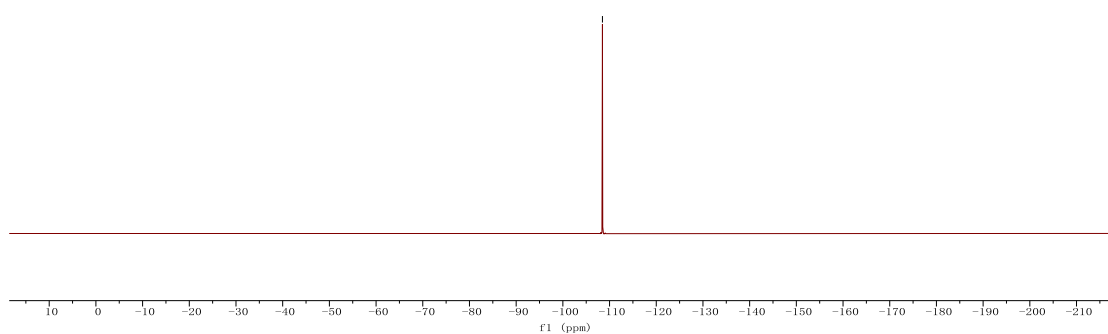

Supplement: d4gc00703d1.pdf [file d4gc00703d1.pdf]
